# Supplementary material for: Enantioenriched α-substituted glutamates/pyroglutamates via enantioselective cyclopropenimine-catalyzed Michael addition of amino ester imines
Source: publisher site journal article supplement (doi:10.3762/bjoc.17.134), 2021-08-17
Supplement: Additional file 1 [file 1860-5397-17-134-S1.pdf]

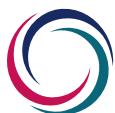

## Supporting Information

for

### **Enantioenriched $\alpha$ -substituted glutamates/pyroglutamates via enantioselective cyclopropenimine-catalyzed Michael addition of amino ester imines**

Zara M. Seibel, Jeffrey S. Bandar and Tristan H. Lambert

*Beilstein J. Org. Chem.* **2021**, *17*, 2077–2084. [doi:10.3762/bjoc.17.134](https://doi.org/10.3762/bjoc.17.134)

### **Experimental details, characterization data, spectra, and HPLC traces**

**General information:** Organic solutions were concentrated using a Büchi rotary evaporator. Commercial reagents were used as provided. Flash column chromatography was performed employing 32–63  $\mu\text{m}$  silica gel (Dynamic Adsorbents Inc). Thin-layer chromatography (TLC) was performed on silica gel 60 F254 plates (EMD).

$^1\text{H}$  and  $^{13}\text{C}$  NMR were recorded in  $\text{CDCl}_3$  on Bruker DRX-400 spectrometers. Data for  $^1\text{H}$  NMR are reported as follows: chemical shift ( $\delta$  ppm), multiplicity (s = singlet, brs = broad singlet, d = doublet, t = triplet, q = quartet, m = multiplet), coupling constant (Hz), integration, and assignment. Data for  $^{13}\text{C}$  NMR are reported in terms of chemical shift. Low- resolution mass spectra (LRMS) were acquired on a JEOL JMS-LCmate liquid chromatography mass spectrometer system using  $\text{CI}^+$  ionization technique.

### **Synthesis of cycloadducts and lactams:**

A vial was charged with cyclopropenimine catalyst (0.1–0.2 equiv) and then imine (0.2 mmol, 1 equiv), ether (0.8 mL, 0.25 M), and methyl acrylate (0.054 mL, 0.6 mmol, 3 equiv) were added. The vial was capped and sealed with parafilm and then stirred for 16–48 hours at room temperature. At that time the mixture was concentrated and the residue was dissolved in a mixture of 2 mL THF and 2 mL 0.5 M aqueous citric acid. After stirring for one hour the mixture was diluted with water (20 mL) and extracted twice with ether ( $2 \times 20$  mL). The ether layers were combined, dried, and concentrated to furnish the crude cycloadduct, which was purified by silica gel chromatography. Meanwhile, potassium carbonate (414 mg, 3 mmol, 30 equiv) was added to the aqueous layer noted above and the mixture was stirred for 3 hours before being extracted with DCM ( $3 \times 20$  mL). The combined organic layers were dried and concentrated. After purification by silica gel chromatography the pure lactams were isolated. Enantiomeric excess was determined

by HPLC analysis of either the imine or lactam products, or by  $^1\text{H}$  NMR analysis of the lactam in the presence of europium(III) tris[3-(heptafluoropropylhydroxymethylene)-*d*-camphorate] as a chiral shift reagent.

Procedure for determination of enantiomeric excess via use of chiral shift reagent  $\text{Eu}(\text{hfc})_3$ : Prior to use,  $\text{CDCl}_3$  was dried with sodium sulfate and filtered through a silica plug. 0.5–2 mg of the lactam was dissolved in 0.6 mL  $\text{CDCl}_3$  under Ar. Approximately 5 mg of  $\text{Eu}(\text{hfc})_3$  was added as a solution in  $\text{CDCl}_3$  (this solution was around 50 mg/mL and was filtered through a syringe filter to remove insoluble paramagnetic impurities). A  $^1\text{H}$  NMR spectrum was obtained. If the peaks were not sufficiently separated, more  $\text{Eu}(\text{hfc})_3$  was added until separation was sufficient.

Enantiomeric excess was determined by comparison of the methyl ester peaks, which were shifted downfield and cleanly separated. NMR spectra are provided of both the racemic mixture and chiral substrate; however, the peaks are not always at the exact same chemical shift due to slightly differing ratios of substrate to  $\text{Eu}(\text{hfc})_3$ .

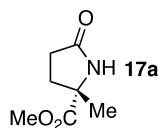

**Methyl 2-methyl-5-oxopyrrolidine-2-carboxylate (17a):** Prepared as described in the general procedure and isolated in 73% yield as a clear oil.  $^1\text{H}$  NMR (400 MHz,  $\text{CDCl}_3$ ): 5.9 (br s, 1H, NH), 3.76 (s, 3H,  $\text{CO}_2\text{CH}_3$ ), 2.50–2.57 (m, 1H, alkylH), 2.41 (t,  $J = 7.6$  Hz, 2H,  $\text{C}(\text{O})\text{CH}_2$ ), 1.99–2.07 (m, 1H, alkylH), 1.52 (s, 3H,  $\text{CCH}_3$ ).  $^{13}\text{C}$  NMR (101 MHz,  $\text{CDCl}_3$ )  $\delta$  176.62, 174.33, 62.05, 52.77, 32.20, 29.83, 25.89. LRMS (APCI $^+$ ): exact mass calc'd for  $\text{C}_7\text{H}_{12}\text{NO}_3$   $[\text{M}+1]^+$  requires  $m/z$  158.07,

found  $m/z$  157.91. HPLC analysis (performed on the imine intermediate): Chiralpak OJ-H (Hex/iPrOH = 90/10, 1 mL/min, 254 nm), 11.5 min (major), 19.6 min (minor), 93% ee.

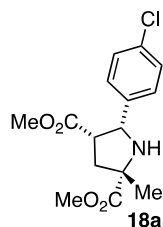

**Dimethyl 2-methyl-5-(4-chlorophenyl)pyrrolidine-2,4-dicarboxylate (18a):** This compound was synthesized similar to above; however, it remained in the aqueous layer after the ether extraction of the citric acid mixture and so was isolated following lactamization as a white solid in 19% yield.  $^1\text{H}$  NMR (400 MHz,  $\text{CDCl}_3$ ): 7.30-7.22 (m, 4H, ArH), 4.68 (d,  $J$  = 7.6 Hz, 1H, ArCH), 3.83 (s, 3H,  $\text{CO}_2\text{CH}_3$ ), 3.40-3.33 (m, 1H,  $\text{MeCO}_2\text{CH}$ ), 3.26 (s, 3H,  $\text{CO}_2\text{CH}_3$ ), 2.73 (dd,  $J$  = 13.6 Hz, 5.2 Hz, 1H,  $\text{CH}_2$ ), 2.07 (dd,  $J$  = 13.6 Hz, 7.6 Hz, 1H,  $\text{CH}_2$ ), 1.517 (s, 3H,  $\text{CH}_3$ ).  $^{13}\text{C}$  NMR (101 MHz,  $\text{CDCl}_3$ ) 176.36, 172.75, 137.63, 133.40, 128.39, 128.19, 65.82, 64.15, 52.65, 51.37, 50.15, 40.07, 27.35. LRMS (APCI $^+$ ): exact mass calc'd for  $\text{C}_{15}\text{H}_{18}\text{ClNO}_4$   $[\text{M}+1]^+$  requires  $m/z$  312.09, found  $m/z$  312.17.

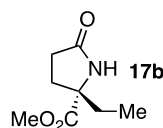

**Methyl 2-ethyl-5-oxopyrrolidine-2-carboxylate (17b):** Prepared as described in the general procedure with a 20% catalyst loading and 48 h reaction time. The title compound was isolated as a white solid in 70% yield.  $^1\text{H}$  NMR (400 MHz,  $\text{CDCl}_3$ ): 6.15 (br s, 1H, NH), 3.76 (s, 3H,  $\text{CO}_2\text{CH}_3$ ), 2.54-2.44 (m, 1H, alkylH), 2.38 (t,  $J$  = 8.0 Hz, 2H, alkylH), 2.12-2.02 (m, 1H, alkylH), 1.95-1.85 (m, 1H, alkylH), 1.85-1.76 (m, 1H, alkylH), 0.90 (t,  $J$  = 7.5 Hz, 3H,  $\text{CH}_3$ ).  $^{13}\text{C}$  NMR (101 MHz,  $\text{CDCl}_3$ )  $\delta$  176.75, 173.92, 66.10, 52.60, 32.27, 30.11, 29.72, 8.38.

LRMS (APCI+): exact mass calc'd for C<sub>8</sub>H<sub>13</sub>NO<sub>3</sub> [M+1]<sup>+</sup> requires *m/z* 172.09, found *m/z* 172.22.

Enantiometric excess (87% ee) was determined by the addition of chiral shift reagent.

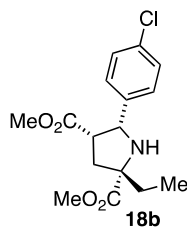

**Dimethyl 2-ethyl-5-(4-chlorophenyl)pyrrolidine-2,4-dicarboxylate (18b):** Prepared as described in the general procedure with a 20% catalyst loading and 48 h reaction time. The title compound was isolated as a white solid in 11% yield. <sup>1</sup>H NMR (400 MHz, CDCl<sub>3</sub>): 7.25 (q, *J* = 8.7 Hz, 4H, ArH), 4.55 (d, *J* = 7.2 Hz, 1H, ArCH), 3.82 (s, 3H, CO<sub>2</sub>CH<sub>3</sub>), 3.25 (s, 3H, CO<sub>2</sub>CH<sub>3</sub>), 3.30-3.23 (m, 1H, MeCO<sub>2</sub>CH), 2.70 (dd, *J* = 13.7 Hz, 4.6 Hz, 1H, CH<sub>2</sub>), 2.06 (dd, *J* = 13.7 Hz, 7.5 Hz, 1H, CH<sub>2</sub>), 1.94-1.79 (m, 1H, CH<sub>2</sub>CH<sub>3</sub>), 1.75-1.62 (m, 1H, CH<sub>2</sub>CH<sub>3</sub>), 0.91 (t, *J* = 7.4 Hz, 3H, CH<sub>2</sub>CH<sub>3</sub>). <sup>13</sup>C NMR (101 MHz, CDCl<sub>3</sub>) δ 176.09, 172.99, 137.90, 133.29, 128.37, 128.12, 70.04, 64.69, 52.39, 51.30, 50.25, 39.27, 33.74, 9.39. LRMS (APCI+): exact mass calc'd for C<sub>16</sub>H<sub>20</sub>ClNO<sub>4</sub> [M+1]<sup>+</sup> requires *m/z* 326.11, found *m/z* 326.20.

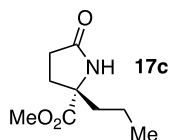

**Methyl 2-propyl-5-oxopyrrolidine-2-carboxylate (17c):** Prepared as described in the general procedure with a 20% catalyst loading and 48 h reaction time. The title compound was isolated as a white solid in 67% yield. <sup>1</sup>H NMR (400 MHz, CDCl<sub>3</sub>): 6.04 (br s, 1H, NH), 3.76 (s, 3H, CO<sub>2</sub>CH<sub>3</sub>), 2.53-2.44 (m, 1H, alkylH), 2.40-2.33 (m, 2H, alkylH), 2.13-2.04 (m, 1H, alkylH), 1.88-1.78 (m, 1H, alkylH), 1.76-1.66 (m, 1H, alkylH), 1.35-1.20 (m, 1H, CH<sub>2</sub>CH<sub>3</sub>), 0.93 (t, *J* = 7.6 Hz, 3H, CH<sub>3</sub>). <sup>13</sup>C NMR (101 MHz, CDCl<sub>3</sub>) δ 176.64, 174.00, 65.58, 52.61, 41.61, 30.72, 29.62, 17.57,

14.02. LRMS (APCI+): exact mass calc'd for C<sub>9</sub>H<sub>15</sub>NO<sub>3</sub> [M+1]<sup>+</sup> requires *m/z* 186.11, found *m/z* 186.18. Enantiometric excess (82% ee) was determined by the addition of chiral shift reagent.

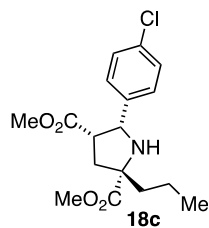

**Dimethyl 2-propyl-5-(4-chlorophenyl)pyrrolidine-2,4-dicarboxylate (18c):** Prepared as described in the general procedure with a 20% catalyst loading and 48 h reaction time. The title compound was isolated as a white solid in 13% yield. <sup>1</sup>H NMR (400 MHz, CDCl<sub>3</sub>): 7.29-7.21 (m, 4H, ArH), 4.56 (d, *J* = 7.2 Hz, 1H, ArCH), 3.81 (s, 3H, CO<sub>2</sub>CH<sub>3</sub>), 3.25 (s, 3H, CO<sub>2</sub>CH<sub>3</sub>), 3.30-3.23 (m, 1H, MeCO<sub>2</sub>CH), 3.01 (br s, 1H, NH), 2.70 (dd, *J* = 13.6 Hz, 4.8 Hz, 1H, CH<sub>2</sub>), 2.06 (dd, *J* = 13.6 Hz, 7.6 Hz, 1H, CH<sub>2</sub>), 1.87-1.76 (m, 1H, CH<sub>2</sub>CH<sub>2</sub>CH<sub>3</sub>), 1.66-1.55 (m, 1H, CH<sub>2</sub>CH<sub>2</sub>CH<sub>3</sub>), 1.52-1.41 (m, 1H, CH<sub>2</sub>CH<sub>3</sub>), 1.22-1.10 (m, 1H, CH<sub>2</sub>CH<sub>3</sub>), 0.91 (t, *J* = 7.2 Hz, 3H, CH<sub>2</sub>CH<sub>3</sub>). <sup>13</sup>C NMR (101 MHz, CDCl<sub>3</sub>) δ 176.25, 172.99, 137.88, 133.29, 128.36, 128.13, 69.52, 64.76, 52.39, 51.29, 50.21, 43.28, 39.66, 18.43, 14.20. LRMS (APCI+): exact mass calc'd for C<sub>17</sub>H<sub>22</sub>ClNO<sub>4</sub> [M+1]<sup>+</sup> requires *m/z* 340.12, found *m/z* 340.25.

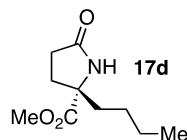

**Methyl 2-butyl-5-oxopyrrolidine-2-carboxylate (17d):** Prepared as described in the general procedure with a 20% catalyst loading and 48 h reaction time. The title compound was isolated as a clear oil in 54% yield. <sup>1</sup>H NMR (400 MHz, CDCl<sub>3</sub>): 6.12 (br s, 1H, NH), 3.78 (s, 3H, CO<sub>2</sub>CH<sub>3</sub>), 2.55-2.45 (m, 1H, alkylH), 2.42-2.36 (m, 2H, alkylH), 2.15-2.05 (m, 1H, alkylH), 1.91-1.83 (m, 1H, alkylH), 1.79-1.69 (m, 1H, alkylH), 1.40-1.15 (m, 4H, alkylH), 0.92 (t, *J* = 7.6 Hz, 3H, CH<sub>3</sub>).

$^{13}\text{C}$  NMR (101 MHz,  $\text{CDCl}_3$ )  $\delta$  176.68, 174.03, 65.60, 52.60, 39.14, 30.65, 29.65, 26.23, 22.62, 13.80. LRMS (APCI $^+$ ): exact mass calc'd for  $\text{C}_{10}\text{H}_{17}\text{NO}_3$   $[\text{M}+1]^+$  requires  $m/z$  200.12, found  $m/z$  200.40. Enantiometric excess (82% ee) was determined by the addition of chiral shift reagent.

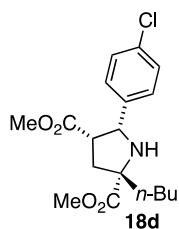

**Dimethyl 2-butyl-5-(4-chlorophenyl)pyrrolidine-2,4-dicarboxylate (18d):** Prepared as described in the general procedure with a 20% catalyst loading and 48 h reaction time. The title compound was isolated as a white solid in 11% yield.  $^1\text{H}$  NMR (400 MHz,  $\text{CDCl}_3$ ): 7.25 (q,  $J$  = 8.7 Hz, 4H, ArH), 4.56 (d,  $J$  = 7.2 Hz, 1H, ArCH), 3.82 (s, 3H,  $\text{CO}_2\text{CH}_3$ ), 3.25 (s, 3H,  $\text{CO}_2\text{CH}_3$ ), 3.30-3.23 (m, 1H,  $\text{MeCO}_2\text{CH}$ ), 3.03 (br s, 1H, NH), 2.70 (dd,  $J$  = 13.7 Hz, 4.5 Hz, 1H,  $\text{CH}_2$ ), 2.06 (dd,  $J$  = 13.8 Hz, 7.5 Hz, 1H,  $\text{CH}_2$ ), 1.89-1.80 (m, 1H, alkylH), 1.67-1.56 (m, 1H, alkylH), 1.50-1.38 (m, 1H, alkylH), 1.35-1.25 (m, 2H, alkylH), 1.15-1.03 (m, 1H, alkylH), 0.89 (t,  $J$  = 7.4 Hz, 3H,  $\text{CH}_2\text{CH}_3$ ).  $^{13}\text{C}$  NMR (101 MHz,  $\text{CDCl}_3$ )  $\delta$  176.27, 173.00, 137.87, 133.29, 128.36, 128.13, 69.52, 64.75, 52.41, 51.30, 50.23, 40.81, 39.65, 27.29, 22.89, 13.98. LRMS (APCI $^+$ ): exact mass calc'd for  $\text{C}_{18}\text{H}_{24}\text{ClNO}_4$   $[\text{M}+1]^+$  requires  $m/z$  354.13, found  $m/z$  354.19.

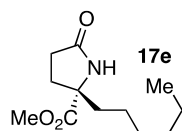

**Methyl 2-hexyl-5-oxopyrrolidine-2-carboxylate (17e):** Prepared as described in the general procedure with a 20% catalyst loading and 48 h reaction time. The title compound was isolated as a clear oil in 46% yield.  $^1\text{H}$  NMR (400 MHz,  $\text{CDCl}_3$ ): 6.01 (br s, 1H, NH), 3.76 (s, 3H,  $\text{CO}_2\text{CH}_3$ ), 2.53-2.43 (m, 1H, alkylH), 2.40-2.35 (m, 2H, alkylH), 2.12-2.02 (m, 1H, alkylH), 1.89-1.80 (m, 1H, alkylH), 1.76-1.68 (m, 1H, alkylH), 1.35-1.16 (m, 8H, alkylH) 0.88 (t,  $J$  = 7.6 Hz, 3H,  $\text{CH}_3$ ).

$^{13}\text{C}$  NMR (101 MHz,  $\text{CDCl}_3$ )  $\delta$  176.62, 174.02, 65.60, 52.60, 39.42, 31.48, 30.66, 29.63, 29.14, 24.06, 22.46, 13.96. LRMS (APCI $^+$ ): exact mass calc'd for  $\text{C}_{12}\text{H}_{21}\text{NO}_3$   $[\text{M}+1]^+$  requires  $m/z$  228.15, found  $m/z$  228.44. Enantiometric excess (80% ee) was determined by the addition of chiral shift reagent.

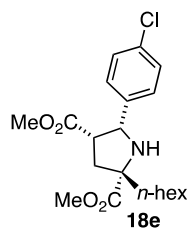

**Dimethyl 2-hexyl-5-(4-chlorophenyl)pyrrolidine-2,4-dicarboxylate (18e):** Prepared as described in the general procedure with a 20% catalyst loading and 48 h reaction time. The title compound was isolated as a white solid in 9% yield.  $^1\text{H}$  NMR (400 MHz,  $\text{CDCl}_3$ ): 7.25 (q,  $J$  = 8.7 Hz, 4H, ArH), 4.56 (d,  $J$  = 7.2 Hz, 1H, ArCH), 3.82 (s, 3H,  $\text{CO}_2\text{CH}_3$ ), 3.25 (s, 3H,  $\text{CO}_2\text{CH}_3$ ), 3.30-3.23 (m, 1H,  $\text{MeCO}_2\text{CH}$ ), 3.00 (br s, 1H, NH), 2.70 (dd,  $J$  = 13.7 Hz, 4.5 Hz, 1H,  $\text{CH}_2$ ), 2.06 (dd,  $J$  = 13.8 Hz, 7.5 Hz, 1H,  $\text{CH}_2$ ), 1.94-1.79 (m, 1H, alkylH), 1.67-1.57 (m, 1H, alkylH), 1.50-1.35 (m, 1H, alkylH), 1.35-1.15 (m, 6H, alkylH), 1.15-1.03 (m, 1H, alkylH), 0.87 (t,  $J$  = 7.4 Hz, 3H,  $\text{CH}_2\text{CH}_3$ ).  $^{13}\text{C}$  NMR (101 MHz,  $\text{CDCl}_3$ )  $\delta$  176.24, 172.96, 137.95, 133.27, 128.35, 128.14, 69.53, 64.72, 52.37, 51.27, 50.21, 41.05, 39.60, 31.69, 29.44, 25.07, 22.57, 14.02. LRMS (APCI $^+$ ): exact mass calc'd for  $\text{C}_{20}\text{H}_{28}\text{ClNO}_4$   $[\text{M}+1]^+$  requires  $m/z$  382.17, found  $m/z$  382.34.

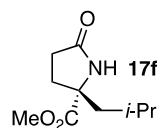

**Methyl 2-isobutyl-5-oxopyrrolidine-2-carboxylate (17f):** Prepared as described in the general procedure with a 20% catalyst loading and 48 h reaction time. The title compound was isolated as a white solid in 62% yield.  $^1\text{H}$  NMR (400 MHz,  $\text{CDCl}_3$ ): 6.15 (br s, 1H, NH), 3.78 (s, 3H,  $\text{CO}_2\text{CH}_3$ ), 2.56-2.46 (m, 1H, alkylH), 2.40-2.34 (m, 2H, alkylH), 2.13-2.04 (m, 1H, alkylH), 1.91-



1.84 (m, 1H, alkylH), 1.73-1.61 (m, 2H, alkylH), 0.95 (d,  $J = 6.4$  Hz, 3H,  $\text{CH}_3$ ), 0.90 (d,  $J = 6.4$  Hz, 3H,  $\text{CH}_3$ ).  $^{13}\text{C}$  NMR (101 MHz,  $\text{CDCl}_3$ )  $\delta$  176.74, 174.33, 65.25, 52.57, 48.07, 32.24, 29.40, 24.90, 23.82, 23.00. LRMS (APCI<sup>+</sup>): exact mass calc'd for  $\text{C}_{10}\text{H}_{17}\text{NO}_3$   $[\text{M}+1]^+$  requires  $m/z$  200.12, found  $m/z$  200.18. HPLC analysis: Chiralpak OD-H (Hex/iPrOH = 97/3, 1 mL/min, 210 nm), 25.5 min (major), 29.8 min (minor), 77% ee.

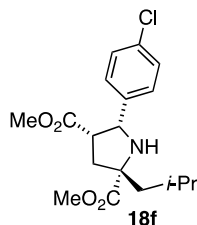

**Dimethyl 2-isobutyl-5-(4-chlorophenyl)pyrrolidine-2,4-dicarboxylate (18f):** Prepared as described in the general procedure with a 20% catalyst loading and 48 h reaction time. The title compound was isolated as a clear oil in 10% yield.  $^1\text{H}$  NMR (400 MHz,  $\text{CDCl}_3$ ): 7.29-7.22 (m, 4H, ArH), 4.56 (d,  $J = 7.6$  Hz, 1H, ArCH), 3.81 (s, 3H,  $\text{CO}_2\text{CH}_3$ ), 3.34 – 3.26 (m, 1H,  $\text{MeCO}_2\text{CH}$ ), 3.24 (s, 3H,  $\text{CO}_2\text{CH}_3$ ), 2.97 (br s, 1H, NH), 2.64 (dd,  $J = 13.7, 5.2$  Hz, 1H, alkylH), 2.04 (dd,  $J = 13.6, 7.6$  Hz, 1H, alkylH), 1.85 – 1.69 (m, 2H, alkylH), 1.59 (dd,  $J = 13.2, 4.9$  Hz, 1H, alkylH), 0.95 (d,  $J = 6.5$  Hz, 3H,  $\text{CH}_3$ ), 0.84 (d,  $J = 6.4$  Hz, 3H,  $\text{CH}_3$ ).  $^{13}\text{C}$  NMR (101 MHz,  $\text{CDCl}_3$ )  $\delta$  176.54, 172.98, 138.13, 133.24, 128.32, 128.23, 68.99, 64.53, 52.27, 51.30, 49.94, 48.94, 40.90, 25.28, 24.29, 22.85. LRMS (APCI<sup>+</sup>): exact mass calc'd for  $\text{C}_{18}\text{H}_{24}\text{ClNO}_4$   $[\text{M}+1]^+$  requires  $m/z$  354.14, found  $m/z$  354.19.

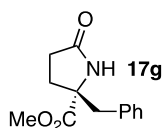

**Methyl 2-benzyl-5-oxopyrrolidine-2-carboxylate (17g):** Prepared as described in the general procedure with a 15% catalyst loading and 48 h reaction time. The title compound was isolated as a white solid in a 77% yield.  $^1\text{H}$  NMR (400 MHz,  $\text{CDCl}_3$ ): 7.36-7.28 (m, 3H, ArH), 7.17-7.13 (m,

2H, *ArH*), 5.89 (br s, 1H, *NH*), 3.74 (s, 3H,  $\text{CO}_2\text{CH}_3$ ), 3.30 (d,  $J = 13.6$  Hz, 1H,  $\text{PhCH}_2$ ), 2.93 (d,  $J = 13.6$  Hz, 1H,  $\text{PhCH}_2$ ), 2.54-2.45 (m, 1H, *alkylH*), 2.39-2.15 (m, 3H, *alkylH*).  $^{13}\text{C}$  NMR (101 MHz,  $\text{CDCl}_3$ )  $\delta$  176.40, 173.56, 134.78, 129.66, 128.77, 127.57, 66.37, 52.60, 45.21, 30.91, 29.60. LRMS (APCI<sup>+</sup>): exact mass calc'd for  $\text{C}_{13}\text{H}_{15}\text{NO}_3$  [ $\text{M}+1$ ]<sup>+</sup> requires  $m/z$  234.11, found  $m/z$  233.97. HPLC analysis: Chiralpak AD-H (Hex/*i*PrOH = 90/10, 1 mL/min, 210 nm), 11.3 min (major), 21.5 min (minor), 75% ee.

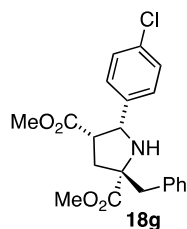

**Dimethyl 2-benzyl-5-(4-chlorophenyl)pyrrolidine-2,4-dicarboxylate (18g):** Prepared as described in the general procedure with a 15% catalyst loading and 48 h reaction time. The title compound was isolated as a white solid in 21% yield.  $^1\text{H}$  NMR (400 MHz,  $\text{CDCl}_3$ ): 7.30-7.18 (m, 9H, *ArH*), 4.49 (d,  $J = 7.6$  Hz, 1H, *ArCH*), 3.75 (s, 3H,  $\text{CO}_2\text{CH}_3$ ), 3.23 (s, 3H,  $\text{CO}_2\text{CH}_3$ ), 3.19-3.15 (m, 1H,  $\text{MeCO}_2\text{CH}$ ), 3.12 (d,  $J = 13.2$  Hz, 1H,  $\text{PhCH}_2$ ), 2.93 (d,  $J = 13.2$  Hz, 1H,  $\text{PhCH}_2$ ), 2.84 (br s, 1H, *NH*), 2.74 (dd,  $J = 14.0$  Hz, 5.6 Hz, 1H,  $\text{CH}_2$ ), 2.20 (dd,  $J = 14.0$  Hz, 7.6 Hz, 1H,  $\text{CH}_2$ ).  $^{13}\text{C}$  NMR (101 MHz,  $\text{CDCl}_3$ )  $\delta$  175.60, 172.69, 138.43, 136.75, 133.25, 130.09, 128.27, 128.16, 126.89, 70.28, 64.26, 52.29, 51.30, 49.80, 45.82, 38.28. LRMS (APCI<sup>+</sup>): exact mass calc'd for  $\text{C}_{21}\text{H}_{22}\text{ClNO}_4$  [ $\text{M}+1$ ]<sup>+</sup> requires  $m/z$  388.12, found  $m/z$  388.33.

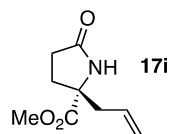

**Methyl 2-allyl-5-oxopyrrolidine-2-carboxylate (17i):** Prepared as described in the general procedure with a 10% catalyst loading and 48 h reaction time. The title compound was isolated as

a white solid in 69% yield.  $^1\text{H}$  NMR (400 MHz,  $\text{CDCl}_3$ ): 5.97 (br s, 1H, NH), 5.73-5.61 (m, 1H, C=CH), 5.22-5.13 (m, 2H, C=CH), 3.76 (s, 3H,  $\text{CO}_2\text{CH}_3$ ), 2.70-2.62 (m, 2H, alkylH), 2.50-2.35 (m, 4H, alkylH), 2.16-2.08 (m, 1H, alkylH).  $^{13}\text{C}$  NMR (101 MHz,  $\text{CDCl}_3$ )  $\delta$  176.57, 173.56, 130.96, 120.68, 65.13, 52.70, 43.53, 30.26, 29.66. LRMS (APCI+): exact mass calc'd for  $\text{C}_9\text{H}_{13}\text{NO}_3$   $[\text{M}+1]^+$  requires  $m/z$  184.09, found  $m/z$  184.15. Enantiometric excess (94% ee) was determined by the addition of chiral shift reagent.

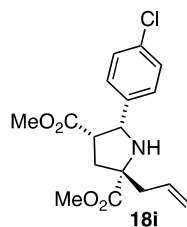

**Dimethyl 2-allyl-5-(4-chlorophenyl)pyrrolidine-2,4-dicarboxylate (18i):** Prepared as described in the general procedure with a 10% catalyst loading and 48 h reaction time. The title compound was isolated as a white solid in 23% yield.  $^1\text{H}$  NMR (400 MHz,  $\text{CDCl}_3$ ): 7.32-7.25 (m, 4H, ArH), 5.92-5.79 (m, 1H, CH=CH<sub>2</sub>), 5.17 (s, 1H, CH=CH<sub>2</sub>), 5.15 (d,  $J$  = 3.6 Hz, 1H, CH=CH<sub>2</sub>), 4.62 (d,  $J$  = 7.6 Hz, 1H, ArCH), 3.84 (s, 3H,  $\text{CO}_2\text{CH}_3$ ), 3.36-3.28 (m, 1H, MeCO<sub>2</sub>CH), 3.28 (s, 3H,  $\text{CO}_2\text{CH}_3$ ), 3.00 (br s, 1H, NH), 2.74 (dd,  $J$  = 13.6 Hz, 4.8 Hz, 1H, CH<sub>2</sub>), 2.60 (dd,  $J$  = 13.6, 7.6 Hz, 1H, CH<sub>2</sub>CH=CH<sub>2</sub>), 2.45 (dd,  $J$  = 13.6, 7.6 Hz, 1H, CH<sub>2</sub>CH=CH<sub>2</sub>), 2.14 (dd,  $J$  = 13.6 Hz, 7.6 Hz, 1H, CH<sub>2</sub>).  $^{13}\text{C}$  NMR (101 MHz,  $\text{CDCl}_3$ )  $\delta$  175.68, 172.76, 138.02, 133.50, 133.30, 128.34, 128.18, 118.70, 69.31, 64.52, 52.44, 51.32, 50.09, 44.89, 38.34. LRMS (APCI+): exact mass calc'd for  $\text{C}_{17}\text{H}_{20}\text{ClNO}_4$   $[\text{M}+1]^+$  requires  $m/z$  338.11, found  $m/z$  338.27.

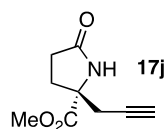

**Methyl 5-oxo-2-(prop-2-yn-1-yl)pyrrolidine-2-carboxylate (17j):** Prepared as described in the general procedure with a 10% catalyst loading and 16 h reaction time. The title compound was

isolated as a white solid in 64% yield.  $^1\text{H}$  NMR (400 MHz,  $\text{CDCl}_3$ ): 5.99 (br s, 1H,  $\text{NH}$ ), 3.80 (s, 3H,  $\text{CO}_2\text{CH}_3$ ), 2.82 (dd,  $J = 16.6, 2.6$  Hz, 1H,  $\text{CH}_2 \equiv \text{CH}$ ), 2.60 (dd,  $J = 16.6, 2.6$  Hz, 1H,  $\text{CH}_2 \equiv \text{CH}$ ), 2.55 – 2.36 (m, 3H, alkylH), 2.29 – 2.13 (m, 1H, alkylH), 2.08 (t,  $J = 2.6$  Hz, 1H,  $\text{CH}_2 \equiv \text{CH}$ ).  $^{13}\text{C}$  NMR (101 MHz,  $\text{CDCl}_3$ )  $\delta$  176.41, 172.67, 77.84, 72.20, 64.48, 53.07, 30.22, 29.68, 29.43. LRMS (APCI+): exact mass calc'd for  $\text{C}_9\text{H}_{11}\text{NO}_3$   $[\text{M}+1]^+$  requires  $m/z$  182.07, found  $m/z$  182.39. Enantiometric excess (88% ee) was determined by the addition of chiral shift reagent.

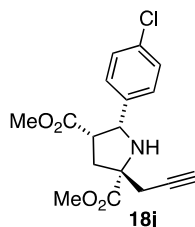

**Dimethyl 5-(4-chlorophenyl)-2-(prop-2-yn-1-yl)pyrrolidine-2,4-dicarboxylate (18j):** Prepared as described in the general procedure with a 10% catalyst loading and 16 h reaction time. The title compound was isolated as a white solid in 20% yield.  $^1\text{H}$  NMR (400 MHz,  $\text{CDCl}_3$ ) 7.37 – 7.19 (m, 4H,  $\text{ArH}$ ), 4.74 (d,  $J = 7.5$  Hz, 1H,  $\text{ArCH}$ ), 3.86 (s, 3H,  $\text{CO}_2\text{CH}_3$ ), 3.42–3.33 (m, 1H,  $\text{MeCO}_2\text{CH}$ ), 3.25 (s, 3H,  $\text{CO}_2\text{CH}_3$ ), 3.11 (br s, 1H,  $\text{NH}$ ), 2.84 – 2.68 (m, 2H,  $\text{CH}_2 \equiv \text{CH}$  and  $\text{CH}_2$ ), 2.63 (dd,  $J = 16.4, 2.6$  Hz, 1H,  $\text{CH}_2 \equiv \text{CH}$ ), 2.24 (dd,  $J = 13.8, 7.5$  Hz, 1H,  $\text{CH}_2$ ), 2.06 (t,  $J = 2.6$  Hz, 1H,  $\text{CH}_2 \equiv \text{CH}$ ).  $^{13}\text{C}$  NMR (101 MHz,  $\text{CDCl}_3$ )  $\delta$  174.73, 172.48, 138.03, 133.40, 128.35, 128.24, 79.95, 71.00, 68.64, 64.77, 52.85, 51.39, 50.13, 37.80, 30.71. LRMS (APCI+): exact mass calc'd for  $\text{C}_{20}\text{H}_{28}\text{ClNO}_4$   $[\text{M}+1]^+$  requires  $m/z$  336.09, found  $m/z$  336.01.

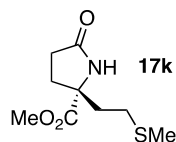

**Methyl 2-methylthioethyl-5-oxopyrrolidine-2-carboxylate (17k):** Prepared as described in the general procedure with a 10% catalyst loading and 16 h reaction time. The title compound was

isolated as a white solid in 76% yield.  $^1\text{H}$  NMR (400 MHz,  $\text{CDCl}_3$ ):  $^1\text{H}$  NMR (400 MHz,  $\text{CDCl}_3$ ): 6.51 (br s, 1H, *NH*), 3.78 (s, 3H,  $\text{CO}_2\text{CH}_3$ ), 2.53-2.42 (m, 3H, *alkylH*), 2.40-2.34 (m, 2H, *alkylH*), 2.27-2.17 (m, 1H, *alkylH*), 2.14-2.06 (m, 1H, *alkylH*), 2.10 (s, 3H,  $\text{SCH}_3$ ) 2.06-1.97 (m, 1H, *alkylH*).  $^{13}\text{C}$  NMR (101 MHz,  $\text{CDCl}_3$ )  $\delta$  176.84, 173.58, 65.24, 52.85, 38.26, 31.27, 29.36, 28.95, 15.58. LRMS (APCI $^+$ ): exact mass calc'd for  $\text{C}_9\text{H}_{15}\text{NO}_3\text{S}$   $[\text{M}+1]^+$  requires  $m/z$  218.08, found  $m/z$  218.18. Enantiometric excess (84% ee) was determined by the addition of chiral shift reagent.

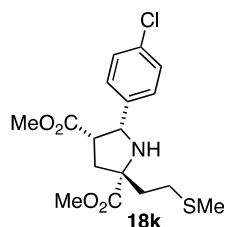

**Dimethyl 2-methylthioethyl-5-(4-chlorophenyl)pyrrolidine-2,4-dicarboxylate (18k):**

Prepared as described in the general procedure with a 10% catalyst loading and 16 h reaction time. The title compound was isolated as a white solid in 19% yield.  $^1\text{H}$  NMR (400 MHz,  $\text{CDCl}_3$ ): 7.31-7.19 (m, 4H, *ArH*), 4.54 (d,  $J = 7.2$  Hz, 1H, *ArCH*), 3.83 (s, 3H,  $\text{CO}_2\text{CH}_3$ ), 3.26 (s, 3H,  $\text{CO}_2\text{CH}_3$ ), 3.35-3.25 (m, 1H,  $\text{MeCO}_2\text{CH}$ ), 3.09 (br s, 1H, *NH*), 2.75-2.60 (m, 2H,  $\text{CH}_2$ ), 2.40-2.30 (m, 1H,  $\text{CH}_2$ ), 2.21-2.03 (m, 3H,  $\text{CH}_2$ ), 2.10 (s, 3H,  $\text{SCH}_3$ ), 1.93-1.84 (m, 2H,  $\text{CH}_2$ ).  $^{13}\text{C}$  NMR (101 MHz,  $\text{CDCl}_3$ )  $\delta$  175.56, 172.90, 137.54, 133.42, 128.44, 128.08, 69.17, 64.84, 52.64, 51.36, 50.19, 40.12, 29.71, 15.69. LRMS (APCI $^+$ ): exact mass calc'd for  $\text{C}_{17}\text{H}_{22}\text{ClNO}_4\text{S}$   $[\text{M}+1]^+$  requires  $m/z$  372.10, found  $m/z$  372.23.

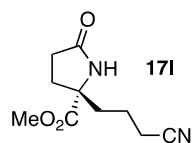

**Methyl 2-(3-cyanopropyl)-5-oxopyrrolidine-2-carboxylate (17l):** Prepared as described in the general procedure with a 10% catalyst loading and a 16 h reaction time. The title compound was

isolated as a white solid in 75% yield.  $^1\text{H}$  NMR (400 MHz,  $\text{CDCl}_3$ ):  $^1\text{H}$  NMR (400 MHz,  $\text{CDCl}_3$ ): 5.96 (br s, 1H, *NH*), 3.79 (s, 3H,  $\text{CO}_2\text{CH}_3$ ), 2.57-2.47 (m, 1H, alkyl*H*), 2.43-2.37 (m, 4H, alkyl*H*), 2.13-1.87 (m, 3H, alkyl*H*), 1.72-1.58 (m, 2H, alkyl*H*).  $^{13}\text{C}$  NMR (101 MHz,  $\text{CDCl}_3$ )  $\delta$  176.61, 173.28, 118.60, 64.79, 53.00, 38.03, 30.52, 29.47, 20.37, 17.22. LRMS (APCI+): exact mass calc'd for  $\text{C}_{18}\text{H}_{21}\text{ClN}_2\text{O}_4$   $[\text{M}+1]^+$  requires  $m/z$  211.10, found  $m/z$  211.14. Enantiometric excess (16% ee) was determined by the addition of chiral shift reagent.

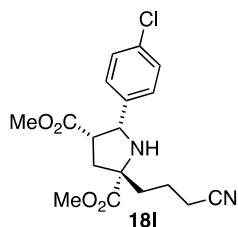

**Dimethyl 5-(4-chlorophenyl)-2-(3-cyanopropyl)pyrrolidine-2,4-dicarboxylate (18I):** Prepared as described in the general procedure with a 10% catalyst loading and a 16 h reaction time. The title compound was isolated as a white solid in 16% yield (9:1 mixture of 2 isomers).  $^1\text{H}$  NMR (400 MHz,  $\text{CDCl}_3$ ) (major isomer): 7.32-7.25 (m, 4H, Ar*H*), 4.62 (d,  $J = 8.8$  Hz, 1H, Ar*CH*), 3.81 (s, 3H,  $\text{CO}_2\text{CH}_3$ ), 3.25 (q, 1H,  $J = 8.0$  Hz,  $\text{MeCO}_2\text{CH}$ ), 3.19 (s, 3H,  $\text{CO}_2\text{CH}_3$ ), 2.85 (br s, 1H, *NH*), 2.55-2.32 (m, 4H, alkyl), 2.15-2.02 (m, 2H, alkyl), 1.90-1.80 (m, 1H, alkyl), 1.79-1.65 (m, 1H, alkyl).  $^{13}\text{C}$  NMR (101 MHz,  $\text{CDCl}_3$ )  $\delta$  176.79, 172.47, 138.92, 133.22, 128.68, 128.04, 119.27, 68.37, 62.83, 52.70, 51.34, 48.48, 37.88, 36.21, 21.23, 17.47. LRMS (APCI+): exact mass calc'd for  $\text{C}_{18}\text{H}_{21}\text{ClN}_2\text{O}_4$   $[\text{M}+1]^+$  requires  $m/z$  365.12, found  $m/z$  365.42.

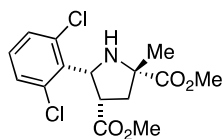

**Dimethyl 2-methyl-5-(2,6-dichlorophenyl)pyrrolidine-2,4-dicarboxylate:** Prepared as described in the general procedure with a 10% catalyst loading and 48 h reaction time. The title

compound was isolated as a white solid in a 69% yield.  $^1\text{H}$  NMR (400 MHz,  $\text{CDCl}_3$ ): 7.30 (d,  $J = 8.0$  Hz, 2H, ArH), 7.13 (t,  $J = 8.0$  Hz, 1H, ArH), 5.22 (d,  $J = 8.0$  Hz, 1H, ArCH), 4.53 (br s, 1H, NH), 3.84 (s, 3H,  $\text{CO}_2\text{CH}_3$ ), 3.50-3.41 (m, 1H,  $\text{MeCO}_2\text{CH}$ ), 3.38 (s, 3H,  $\text{CO}_2\text{CH}_3$ ), 2.82 (dd,  $J = 13.6$  Hz, 5.2 Hz, 1H,  $\text{CH}_2$ ), 2.05 (dd,  $J = 13.6$  Hz, 7.6 Hz, 1H,  $\text{CH}_2$ ).  $^{13}\text{C}$  NMR (101 MHz,  $\text{CDCl}_3$ )  $\delta$  175.90, 172.64, 135.55, 132.49, 129.40, 128.91, 65.92, 62.09, 52.58, 51.80, 48.24, 40.47, 26.13. LRMS (APCI+): exact mass calc'd for  $\text{C}_{15}\text{H}_{17}\text{Cl}_2\text{NO}_4$   $[\text{M}+1]^+$  requires  $m/z$  346.05, found  $m/z$  346.18. HPLC analysis: Chiralpak AD-H (Hex/iPrOH = 90/10, 1 mL/min, 254 nm), 6.7 min, 7.4 min, 0% ee.

## Synthesis of imines

### Method A

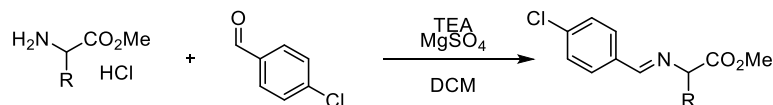

According to the method of Wang et. al.,<sup>1</sup> the racemic amino acid methyl ester hydrogen chloride (6 mmol, 1.2 equiv) and magnesium sulfate (960 mg, 8 mmol, 1.6 equiv) were dissolved in DCM (10 mL) and triethylamine (1 mL). After stirring for one hour at room temperature, the aldehyde (5 mmol, 1 equiv) was added and the mixture was stirred overnight. The mixture was filtered and washed twice with water and with brine. The organic layer was dried with sodium sulfate and concentrated to furnish the product which was used without further purification.

### Method B

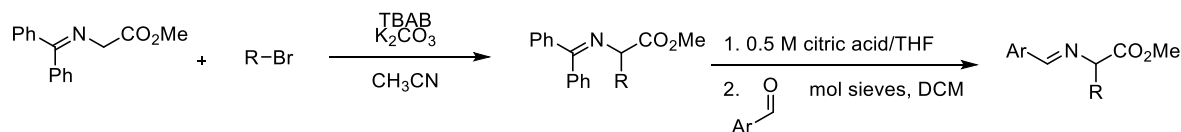

<sup>1</sup> Wang, C. J.; Liang, G.; Xue, Z. Y.; Gao, F. *J. Am. Chem. Soc.* **2008**, *130*, 17250.

Glycine benzophenone imine (2.02 g, 8 mmol, 1 equiv), tetrabutylammonium bromide (258 mg, 0.8 mmol, 0.1 equiv), and potassium carbonate (1.1 g, 8 mmol, 1 equiv) were dissolved in acetonitrile (20 mL). The mixture was stirred for 15 minutes at room temperature at which point the alkyl bromide (9.6 mmol, 1.2 equiv) was added. The mixture was heated to reflux and stirred overnight at reflux. Upon cooling it was filtered, concentrated and purified by silica gel chromatography.

The benzophenone imine (3 mmol) was dissolved in THF (30 mL) and 0.5 M citric acid (30 mL). After stirring for three hours the THF was removed by rotary evaporation and the remaining aqueous layer was extracted five times with ether. The aqueous layer was basified with saturated sodium bicarbonate and extracted three times with DCM. The combined organic layers were dried and concentrated to furnish the free amine, which was dissolved in DCM (0.25 M) with molecular sieves. The aldehyde (1 equiv, based on the mass of the free amine) was added and the mixture was stirred at room temperature overnight. The mixture was filtered, dried with sodium sulfate, and concentrated to furnish the imine, which was used without further purification.

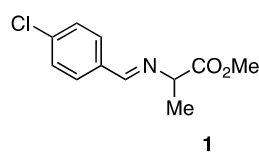

**Methyl (*E*)-2-[(4-chlorobenzylidene)amino]propanoate (1):** Synthesized according to method A to furnish the title compound as a pale yellow oil in 91% yield. Spectral data were consistent with those previously reported.<sup>2</sup>

<sup>2</sup> Achard, T.; Belokon, Y.N.; Fuentes, J. A.; North, M.; Parsons, T. *Tetrahedron* **2004**, *60*, 5919.



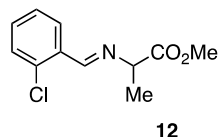

**Methyl (*E*)-2-[(2-chlorobenzylidene)amino]propanoate (12):** Synthesized according to method A to furnish the title compound as a pale yellow oil in 71% yield. Spectral data were consistent with those previously reported.<sup>2</sup>

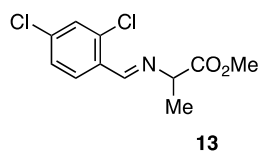

**Methyl (*E*)-2-[(2,4-dichlorobenzylidene)amino]propanoate (13):** Synthesized according to method A to furnish the title compound as a pale yellow oil in 70% yield. <sup>1</sup>H NMR (400 MHz, CDCl<sub>3</sub>): 8.71 (s, 1H, N=CH), 8.09 (d, *J* = 8.8 Hz, 1H, ArH), 7.5-7.25 (m, 2H, ArH), 4.25 (q, *J* = 6.8 Hz, 1H, CHCH<sub>3</sub>), 3.79 (s, 3H, CO<sub>2</sub>CH<sub>3</sub>), 1.56 (d, *J* = 6.8 Hz, 3 H, CHCH<sub>3</sub>). <sup>13</sup>C NMR (101 MHz, CDCl<sub>3</sub>) δ 172.42, 158.39, 137.30, 135.77, 131.33, 129.54, 129.38, 127.45, 67.83, 52.15, 19.36. LRMS (APCI<sup>+</sup>): exact mass calc'd for C<sub>11</sub>H<sub>11</sub>Cl<sub>2</sub>NO<sub>2</sub> [M+1]<sup>+</sup> requires *m/z* 260.02, found *m/z* 260.25.

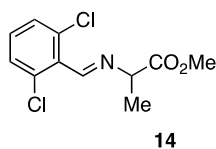

**Methyl (*E*)-2-[(2,6-dichlorobenzylidene)amino]propanoate (14):** Synthesized according to method A to furnish the title compound as a white solid in 61% yield. <sup>1</sup>H NMR (400 MHz, CDCl<sub>3</sub>): 8.47 (s, 1H, N=CH), 7.34 (d, *J* = 7.6 Hz, 2H, ArH), 7.23 (t, *J* = 7.6 Hz, 1H, ArH), 4.27 (q, *J* = 6.8 Hz, 1H, CHCH<sub>3</sub>), 3.78 (s, 3H, CO<sub>2</sub>CH<sub>3</sub>), 1.59 (d, *J* = 6.8 Hz, 3 H, CHCH<sub>3</sub>). <sup>13</sup>C NMR (101 MHz, CDCl<sub>3</sub>) δ 172.29, 158.85, 134.66, 132.84, 130.52, 128.54, 68.51, 52.30, 19.34. LRMS (APCI<sup>+</sup>): exact mass calc'd for C<sub>11</sub>H<sub>11</sub>Cl<sub>2</sub>NO<sub>2</sub> [M+1]<sup>+</sup> requires *m/z* 260.02, found *m/z* 260.10.

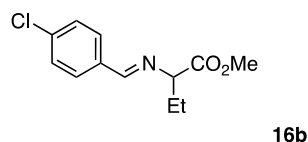

**Methyl (*E*)-2-[(4-chlorobenzylidene)amino]butanoate (16b):** Synthesized according to method A to furnish the title compound as a pale yellow oil in 90% yield. Spectral data were consistent with those previously reported.<sup>3</sup>

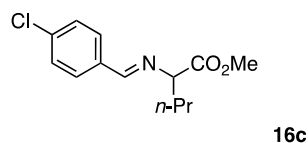

**Methyl (*E*)-2-[(4-chlorobenzylidene)amino]pentanoate (17c):** Synthesized according to method A to furnish the title compound as a yellow oil in 88% yield. <sup>1</sup>H NMR (400 MHz, CDCl<sub>3</sub>): 8.23 (s, 1H, N=CH), 7.72 (d, *J* = 8.4 Hz, 2H, Ar*H*), 7.39 (d, *J* = 8.4 Hz, 2H, Ar*H*), 3.99 (dd, *J* = 8.0 Hz, 4.8 Hz, 1H, CHPr), 3.74 (s, 3H, CO<sub>2</sub>CH<sub>3</sub>), 2.04-1.81 (m, 1H, CH<sub>2</sub>CH<sub>2</sub>CH<sub>3</sub>), 1.31-1.17 (m, 1H, CH<sub>2</sub>CH<sub>3</sub>), 1.93 (t, *J* = 7.2 Hz, CH<sub>2</sub>CH<sub>3</sub>). <sup>13</sup>C NMR (101 MHz, CDCl<sub>3</sub>) δ 172.31, 161.61, 136.88, 134.17, 129.63, 128.72, 72.93, 51.90, 35.34, 19.04, 13.60. LRMS (APCI<sup>+</sup>): exact mass calc'd for C<sub>13</sub>H<sub>16</sub>ClNO<sub>2</sub> [M+1]<sup>+</sup> requires *m/z* 254.09, found *m/z* 254.18.

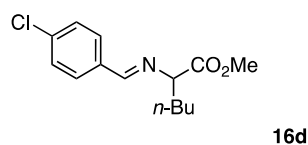

**Methyl (*E*)-2-[(4-chlorobenzylidene)amino]hexanoate (16d):** Synthesized according to method A to furnish the title compound as a brown oil in 85% yield. <sup>1</sup>H NMR (400 MHz, CDCl<sub>3</sub>): 8.25 (s, 1H, N=CH), 7.74 (d, *J* = 8.4 Hz, 2H, Ar*H*), 7.42 (d, *J* = 8.4 Hz, 2H, Ar*H*), 3.99 (dd, *J* = 8.3, 5.4 Hz, 1H), 3.77 (s, 3H, CO<sub>2</sub>CH<sub>3</sub>), 2.13 – 1.78 (m, 2H, alkyl*H*), 1.45 – 1.12 (m, 4H, alkyl*H*), 0.92 (t, *J* = 7.1 Hz, 3H, CH<sub>2</sub>CH<sub>3</sub>). <sup>13</sup>C NMR (101 MHz, CDCl<sub>3</sub>) δ 172.58, 161.72, 137.09, 134.17, 129.72,

<sup>3</sup> Belokon, Y. N.; Bhawe, D.; D'addario, D.; Groaz, E.; North, M.; Tagliazucca, V. *Tetrahedron* **2004**, 60, 1849.

128.86, 73.46, 52.12, 33.12, 28.07, 22.33, 13.91. LRMS (APCI+): exact mass calc'd for  $C_{14}H_{18}ClNO_2$   $[M+1]^+$  requires  $m/z$  268.10, found  $m/z$  268.11.

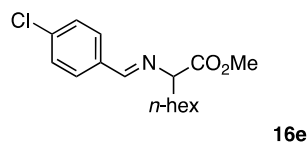

**Methyl (*E*)-2-[(4-chlorobenzylidene)amino]octanoate (16e):** Synthesized according to method A to furnish the title compound as a brown oil in 82% yield.  $^1H$  NMR (400 MHz,  $CDCl_3$ ): .  $^1H$  NMR (400 MHz,  $CDCl_3$ ): 8.23 (s, 1H,  $N=CH$ ), 7.72 (d,  $J = 8.4$  Hz, 2H,  $ArH$ ), 7.39 (d,  $J = 8.4$  Hz, 2H,  $ArH$ ), 3.97 (dd,  $J = 8.3, 5.4$  Hz, 1H), 3.74 (s, 3H,  $CO_2CH_3$ ), 2.08 – 1.81 (m, 2H,  $alkylH$ ), 1.35 – 1.18 (m, 8H,  $alkylH$ ), 0.86 (t,  $J = 6.7$  Hz, 3H,  $CH_2CH_3$ ).  $^{13}C$  NMR (101 MHz,  $CDCl_3$ )  $\delta$  172.56, 161.70, 137.07, 134.17, 129.70, 128.85, 73.44, 52.09, 33.39, 31.59, 28.87, 25.84, 22.53, 14.01. LRMS (APCI+): exact mass calc'd for  $C_{16}H_{22}ClNO_2$   $[M+1]^+$  requires  $m/z$  296.13, found  $m/z$  296.18.

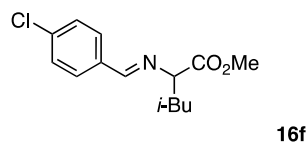

**Methyl (*E*)-2-[(4-chlorobenzylidene)amino]-4-methylpentanoate (16f):** Synthesized according to method A to furnish the title compound as a pale yellow oil in 84% yield. Spectral data were consistent with those previously reported.<sup>3</sup>

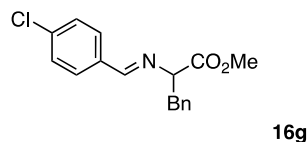

**Methyl (*E*)-2-[(4-chlorobenzylidene)amino]-3-phenylpropanoate (16g):** Synthesized according to method A to furnish the title compound as a white solid in 86% yield. Spectral data were consistent with those previously reported.<sup>3</sup>

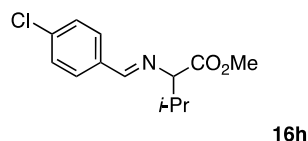

**Methyl (*E*)-2-[(4-chlorobenzylidene)amino]-3-methylbutanoate (16h):** Synthesized according to method A to furnish the title compound as a pale yellow oil in 75% yield. Spectral data were consistent with those previously reported.<sup>3</sup>

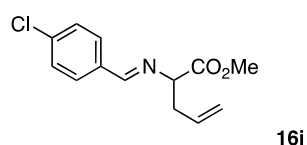

**Methyl (*E*)-2-[(4-chlorobenzylidene)amino]but-3-enoate (16i):** Synthesized according to method B to furnish the title compound as a pale yellow oil in 53% yield from the allyl benzophenone glycine imine. Spectral data were consistent with those previously reported.<sup>9</sup>

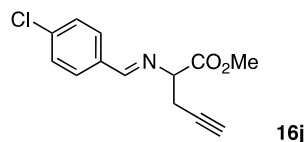

**Methyl (*E*)-2-[(4-chlorobenzylidene)amino]pent-4-ynoate (16j):** Synthesized according to method B to furnish the title compound as a pale yellow oil in 23% yield from the propargyl benzophenone glycine imine. <sup>1</sup>H NMR (400 MHz, CDCl<sub>3</sub>): 8.31 (s, 1H, N=CH), 7.73 (d, *J* = 8.5 Hz, 2H, ArH), 7.40 (d, *J* = 8.5 Hz, 2H, ArH), 4.12 (dd, *J* = 8.5, 5.2 Hz, 1H, CHCO<sub>2</sub>CH<sub>3</sub>), 3.77 (s, 3H, CO<sub>2</sub>CH<sub>3</sub>), 2.94 (ddd, *J* = 16.8, 5.2, 2.6 Hz, 1H, CH<sub>2</sub>≡CH), 2.75 (ddd, *J* = 16.8, 8.5, 2.6 Hz, 1H, CH<sub>2</sub>≡CH), 2.00 (t, *J* = 2.6 Hz, 1H, CH<sub>2</sub>≡CH). <sup>13</sup>C NMR (101 MHz, CDCl<sub>3</sub>) δ 170.73, 163.36, 137.43, 133.87, 129.91, 128.92, 80.09, 71.57, 71.02, 52.54, 23.30. LRMS (APCI<sup>+</sup>): exact mass calc'd for C<sub>13</sub>H<sub>12</sub>ClNO<sub>2</sub> [M+1]<sup>+</sup> requires *m/z* 250.06, found *m/z* 250.37.

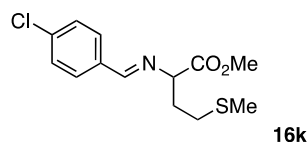

**Methyl (E)-2-[(4-chlorobenzylidene)amino]-4-(methylthio)butanoate (16k):** Synthesized according to method A to furnish the title compound as an orange oil in 90% yield.  $^1\text{H}$  NMR (400 MHz,  $\text{CDCl}_3$ ): 8.28 (s, 1H,  $\text{N}=\text{CH}$ ), 7.72 (d,  $J = 8.4$  Hz, 2H,  $\text{ArH}$ ), 7.40 (d,  $J = 8.4$  Hz, 2H,  $\text{ArH}$ ), 4.21 (dd,  $J = 8.4$  Hz, 5.2 Hz, 1H,  $\text{CHCO}_2\text{CH}_3$ ), 3.75 (s, 3H,  $\text{CO}_2\text{CH}_3$ ), 2.64-2.54 (m, 1H,  $\text{CHCH}_2$ ), 2.50-2.39 (m, 1H,  $\text{CHCH}_2$ ), 2.33-2.17 (m, 2H,  $\text{CH}_2\text{S}$ ), 2.09 (s, 3H,  $\text{SCH}_3$ ).  $^{13}\text{C}$  NMR (101 MHz,  $\text{CDCl}_3$ )  $\delta$  171.82, 162.85, 137.06, 134.01, 129.71, 128.79, 70.93, 52.15, 31.90, 30.14, 15.08. LRMS (APCI+): exact mass calc'd for  $\text{C}_{13}\text{H}_{16}\text{ClNO}_2\text{S}$   $[\text{M}+1]^+$  requires  $m/z$  286.06, found  $m/z$  286.07.

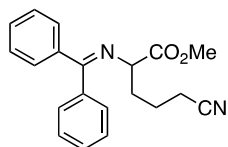

**Methyl 5-cyano-2-[(diphenylmethylene)amino]pentanoate:** Synthesized according to method B to furnish the title compound as a white solid in 43% yield.  $^1\text{H}$  NMR (400 MHz,  $\text{CDCl}_3$ ): 7.64 (d,  $J = 7.2$ , 2H,  $\text{ArH}$ ), 7.51-7.76 (m, 4H,  $\text{ArH}$ ), 7.34 (t,  $J = 8.2$  Hz, 2H,  $\text{ArH}$ ), 7.21 – 7.13 (m, 2H,  $\text{ArH}$ ), 4.10 (dd,  $J = 7.4$ , 5.1 Hz, 1H,  $\text{CHCO}_2\text{CH}_3$ ), 3.72 (s, 3H,  $\text{CO}_2\text{CH}_3$ ), 2.37 – 2.22 (m, 2H,  $\text{alkylH}$ ), 2.12 – 1.96 (m, 2H,  $\text{alkylH}$ ), 1.67 (m, 2H,  $\text{alkylH}$ ).  $^{13}\text{C}$  NMR (101 MHz,  $\text{CDCl}_3$ )  $\delta$  172.07, 171.20, 139.14, 136.07, 130.62, 128.88, 128.83, 128.72, 128.15, 127.68, 119.37, 64.25, 52.26, 32.48, 22.10, 17.08. LRMS (APCI+): exact mass calc'd for  $\text{C}_{20}\text{H}_{20}\text{N}_2\text{O}_2$   $[\text{M}+1]^+$  requires  $m/z$  321.15, found  $m/z$  321.11.

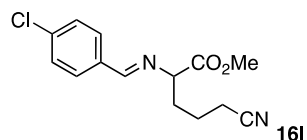

**Methyl (*E*)-2-[(4-chlorobenzylidene)amino]-5-cyanopentanoate (16l):** Synthesized according to method B to furnish the title compound as a pale yellow oil in 45% yield.  $^1\text{H}$  NMR (400 MHz,  $\text{CDCl}_3$ ): 8.27 (s, 1H,  $\text{N}=\text{CH}$ ), 7.72 (d,  $J = 8.4$  Hz, 2H,  $\text{ArH}$ ), 7.41 (d,  $J = 8.4$  Hz, 2H,  $\text{ArH}$ ), 4.03 (dd,  $J = 7.4, 5.6$  Hz, 1H,  $\text{CHCO}_2\text{Me}$ ), 3.76 (s, 3H,  $\text{CO}_2\text{Me}$ ), 2.41 (t,  $J = 7.1$  Hz, 2H,  $\text{CH}_2\text{CN}$ ), 2.18 – 2.01 (m, 2H,  $\text{alkylH}$ ), 1.73 (m, 2H,  $\text{alkylH}$ ).  $^{13}\text{C}$  NMR (101 MHz,  $\text{CDCl}_3$ )  $\delta$  171.53, 162.85, 137.47, 133.84, 129.78, 128.98, 119.25, 71.98, 52.39, 32.19, 22.01, 17.09. LRMS (APCI+): exact mass calc'd for  $\text{C}_{14}\text{H}_{15}\text{ClN}_2\text{O}_2$   $[\text{M}+1]^+$  requires  $m/z$  279.08, found  $m/z$  279.34.

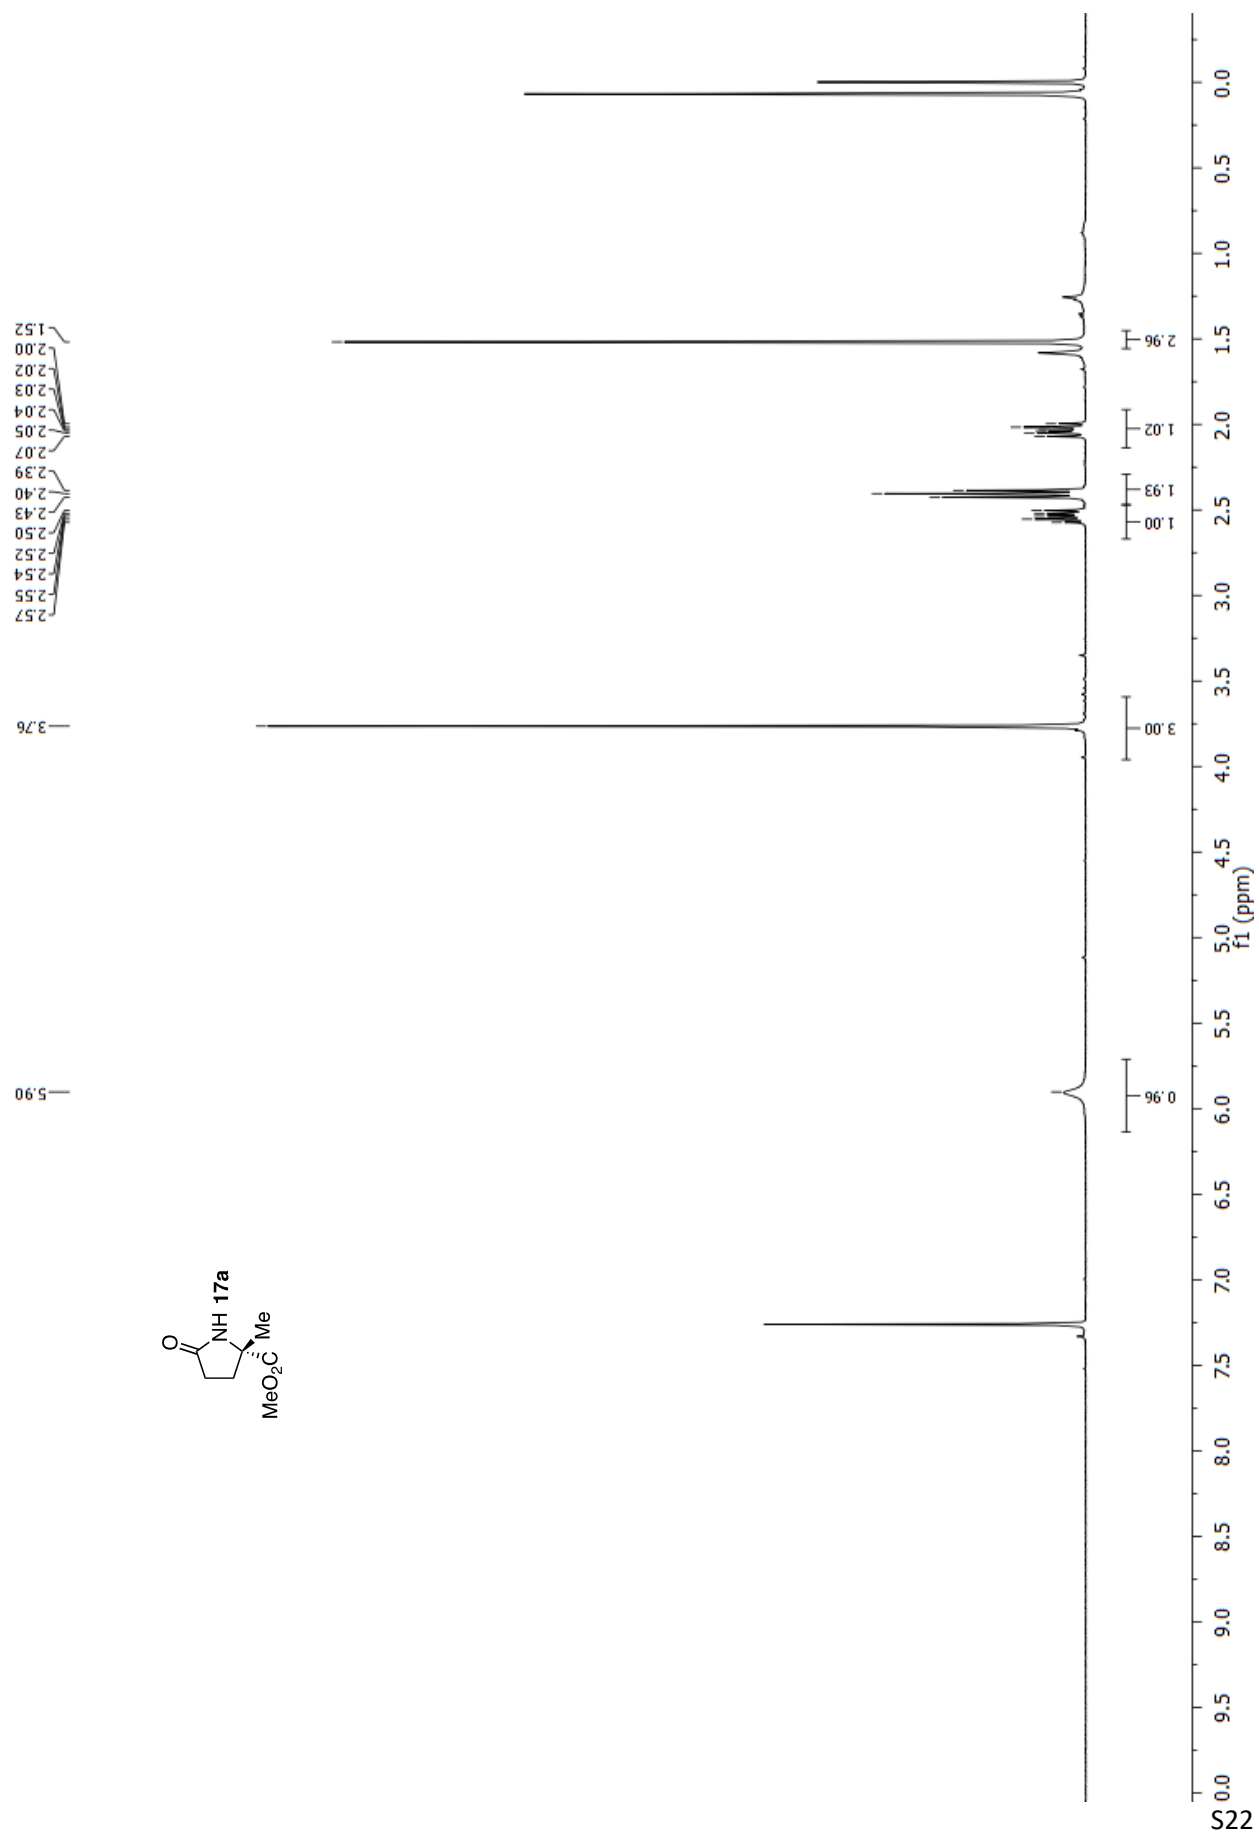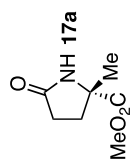

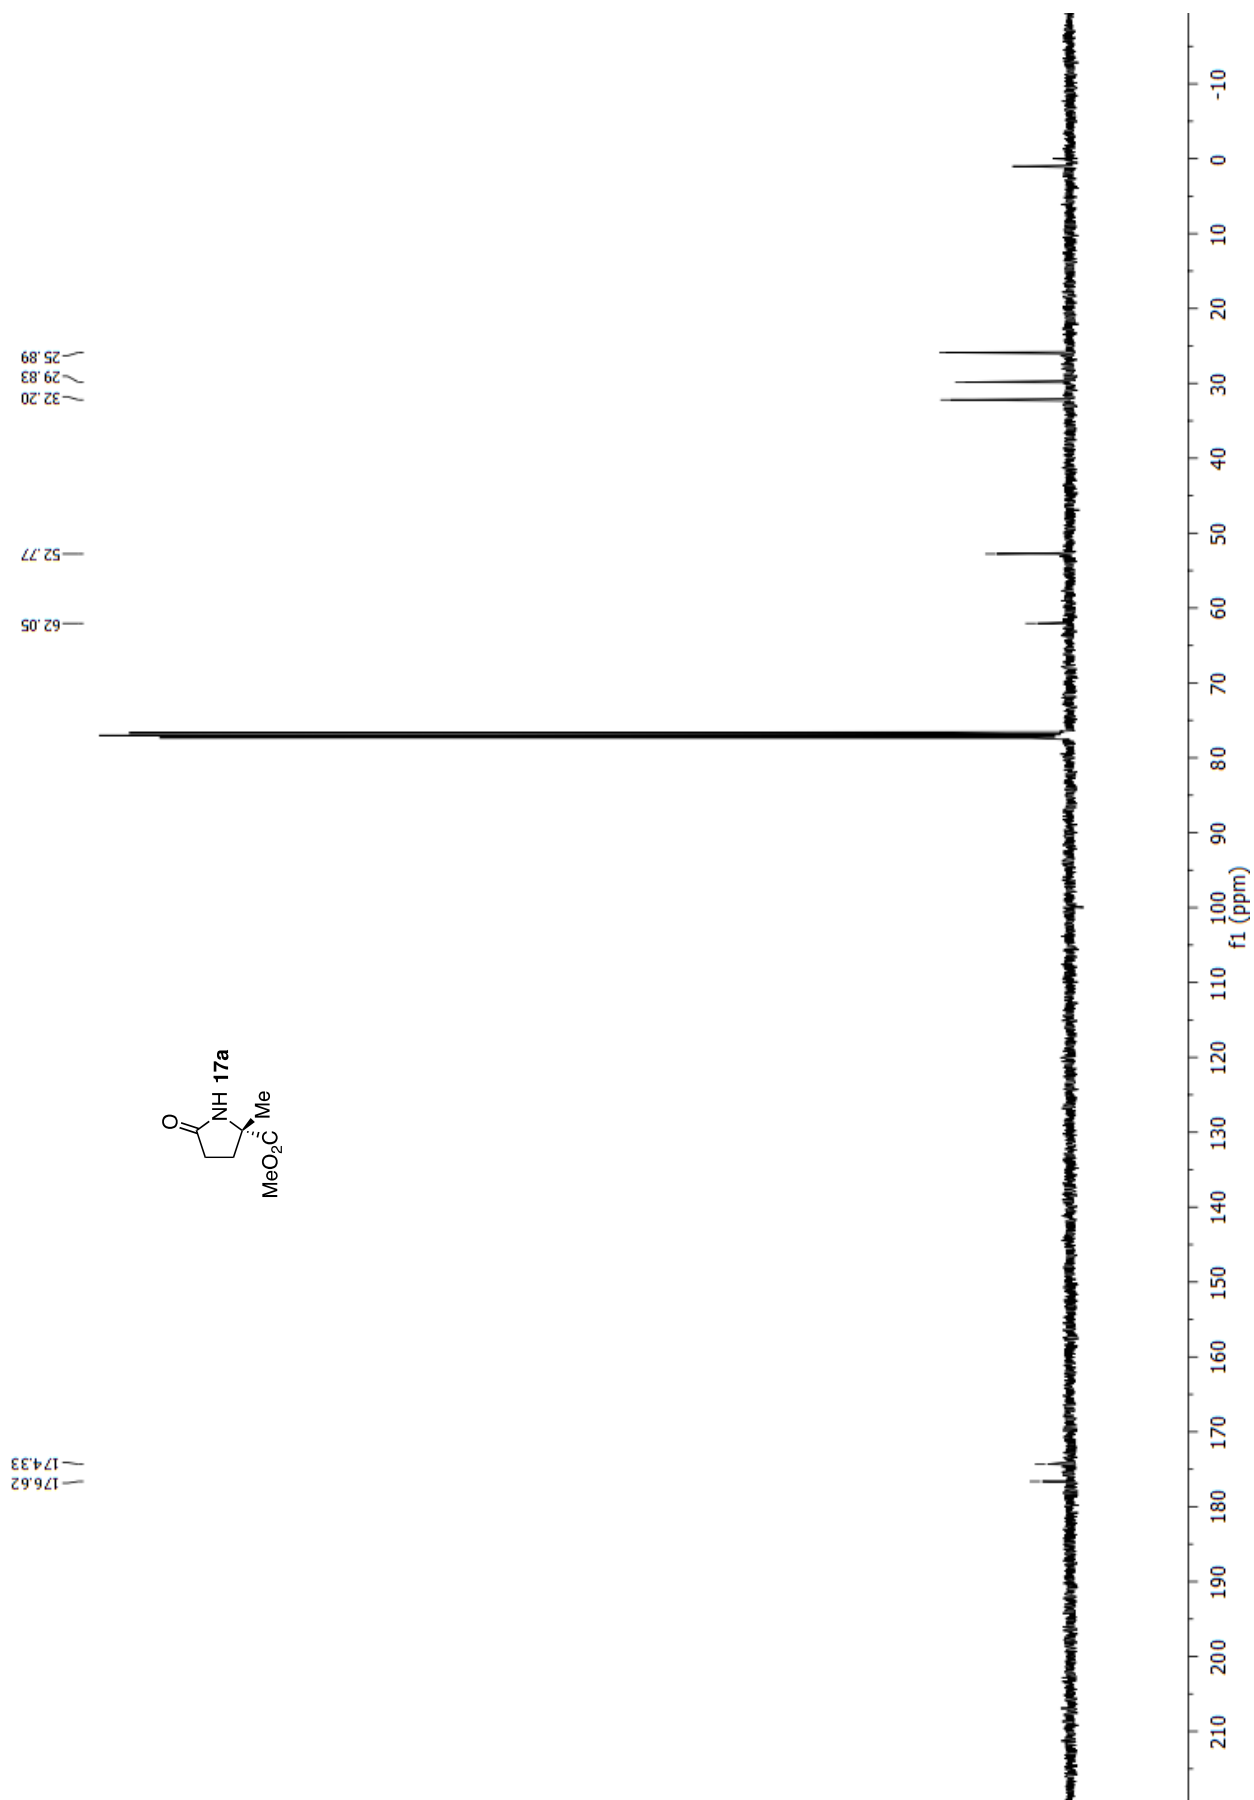



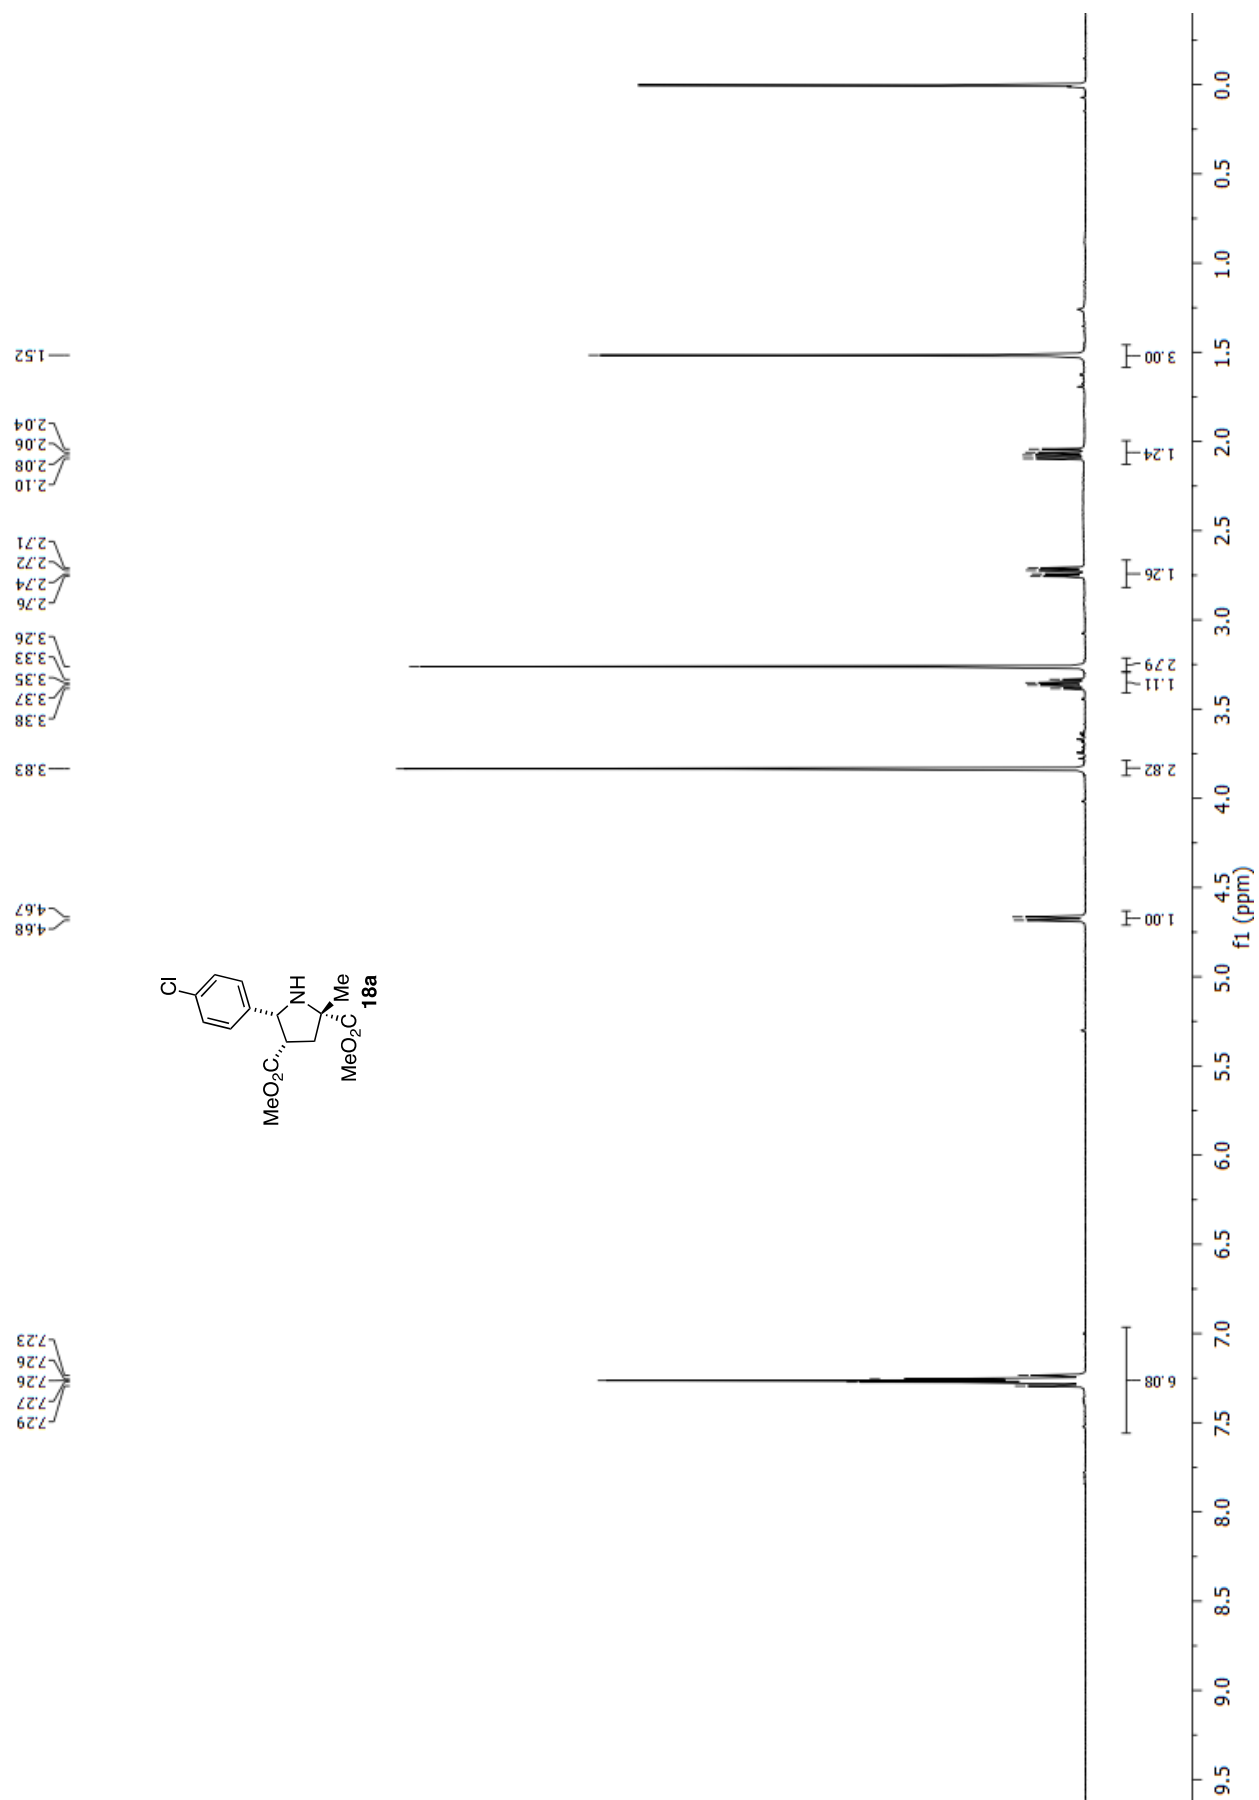

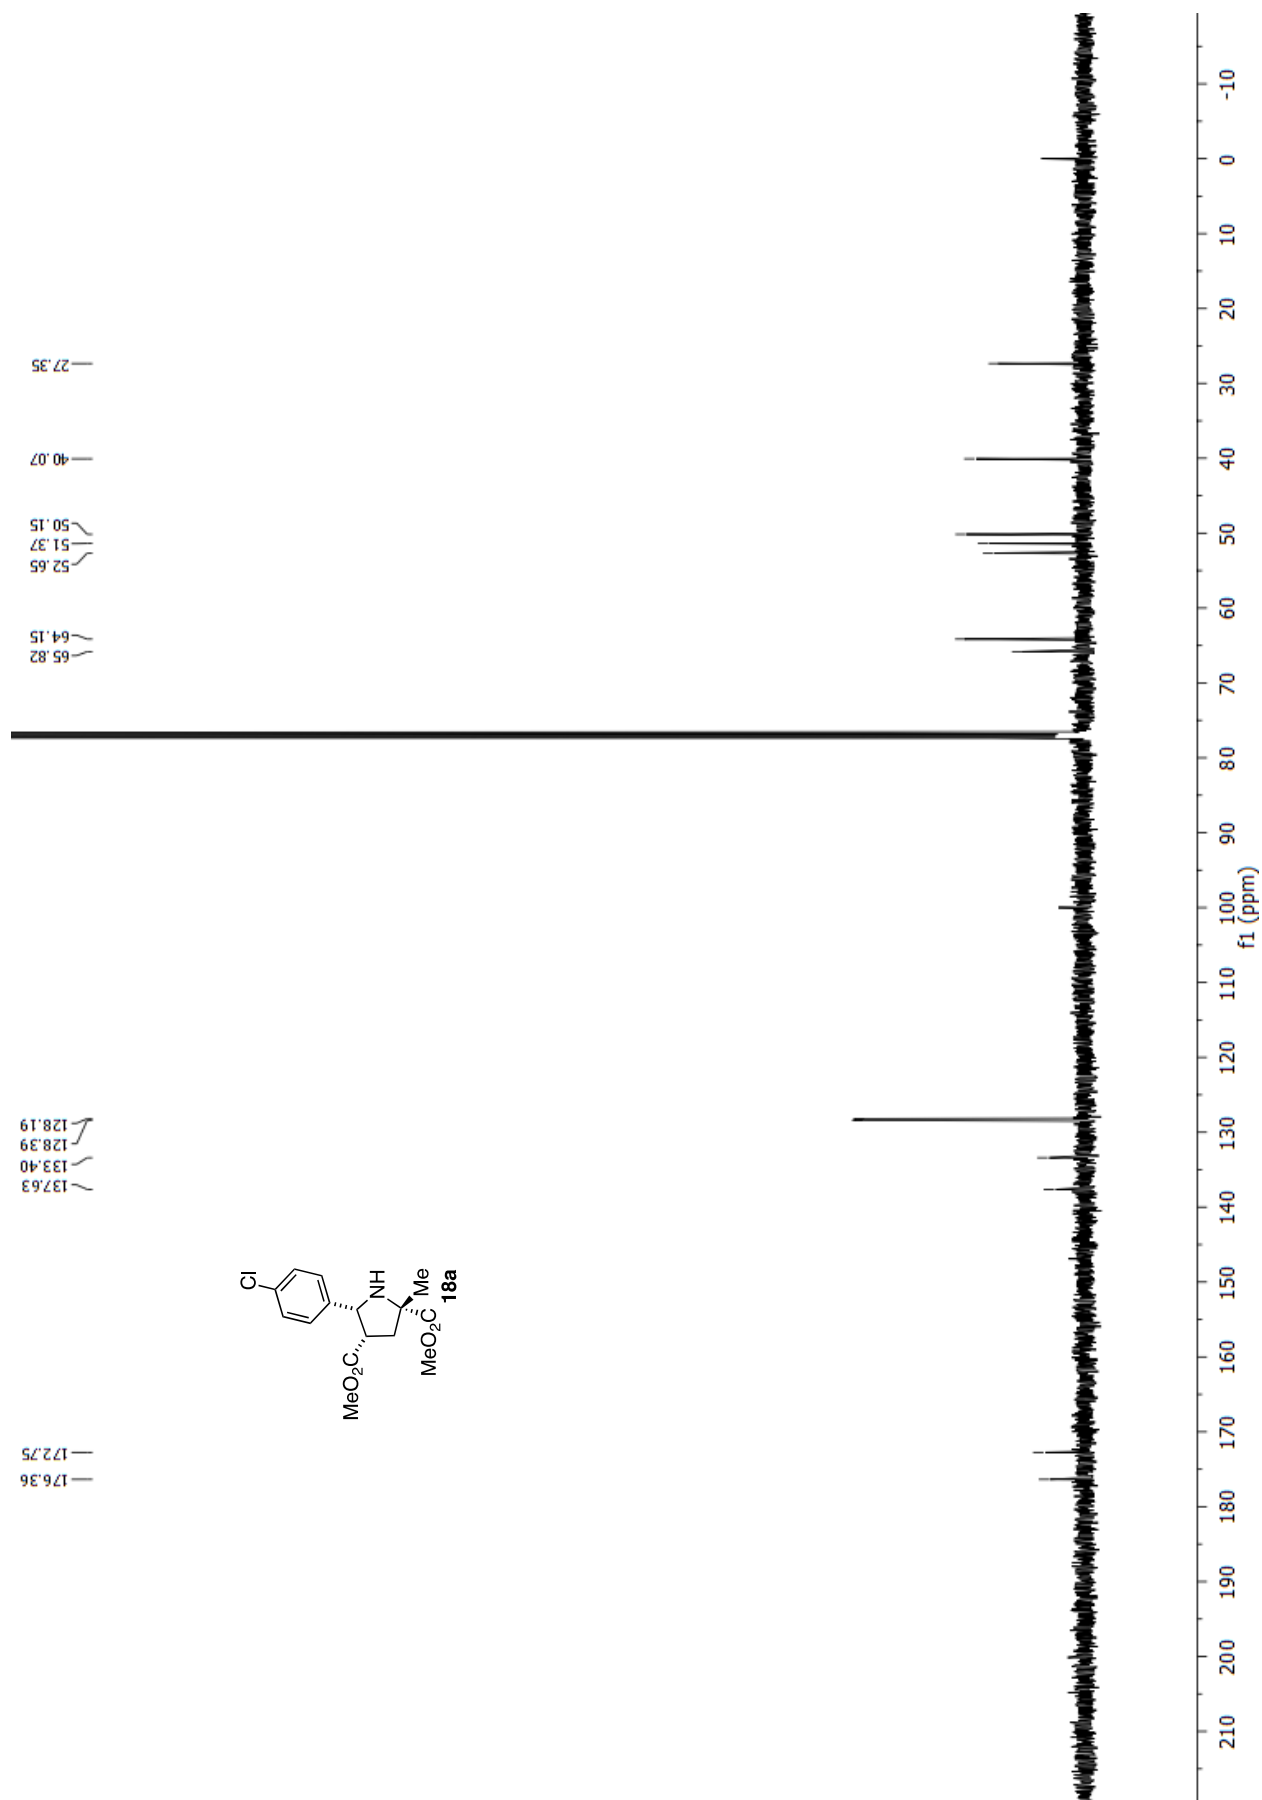

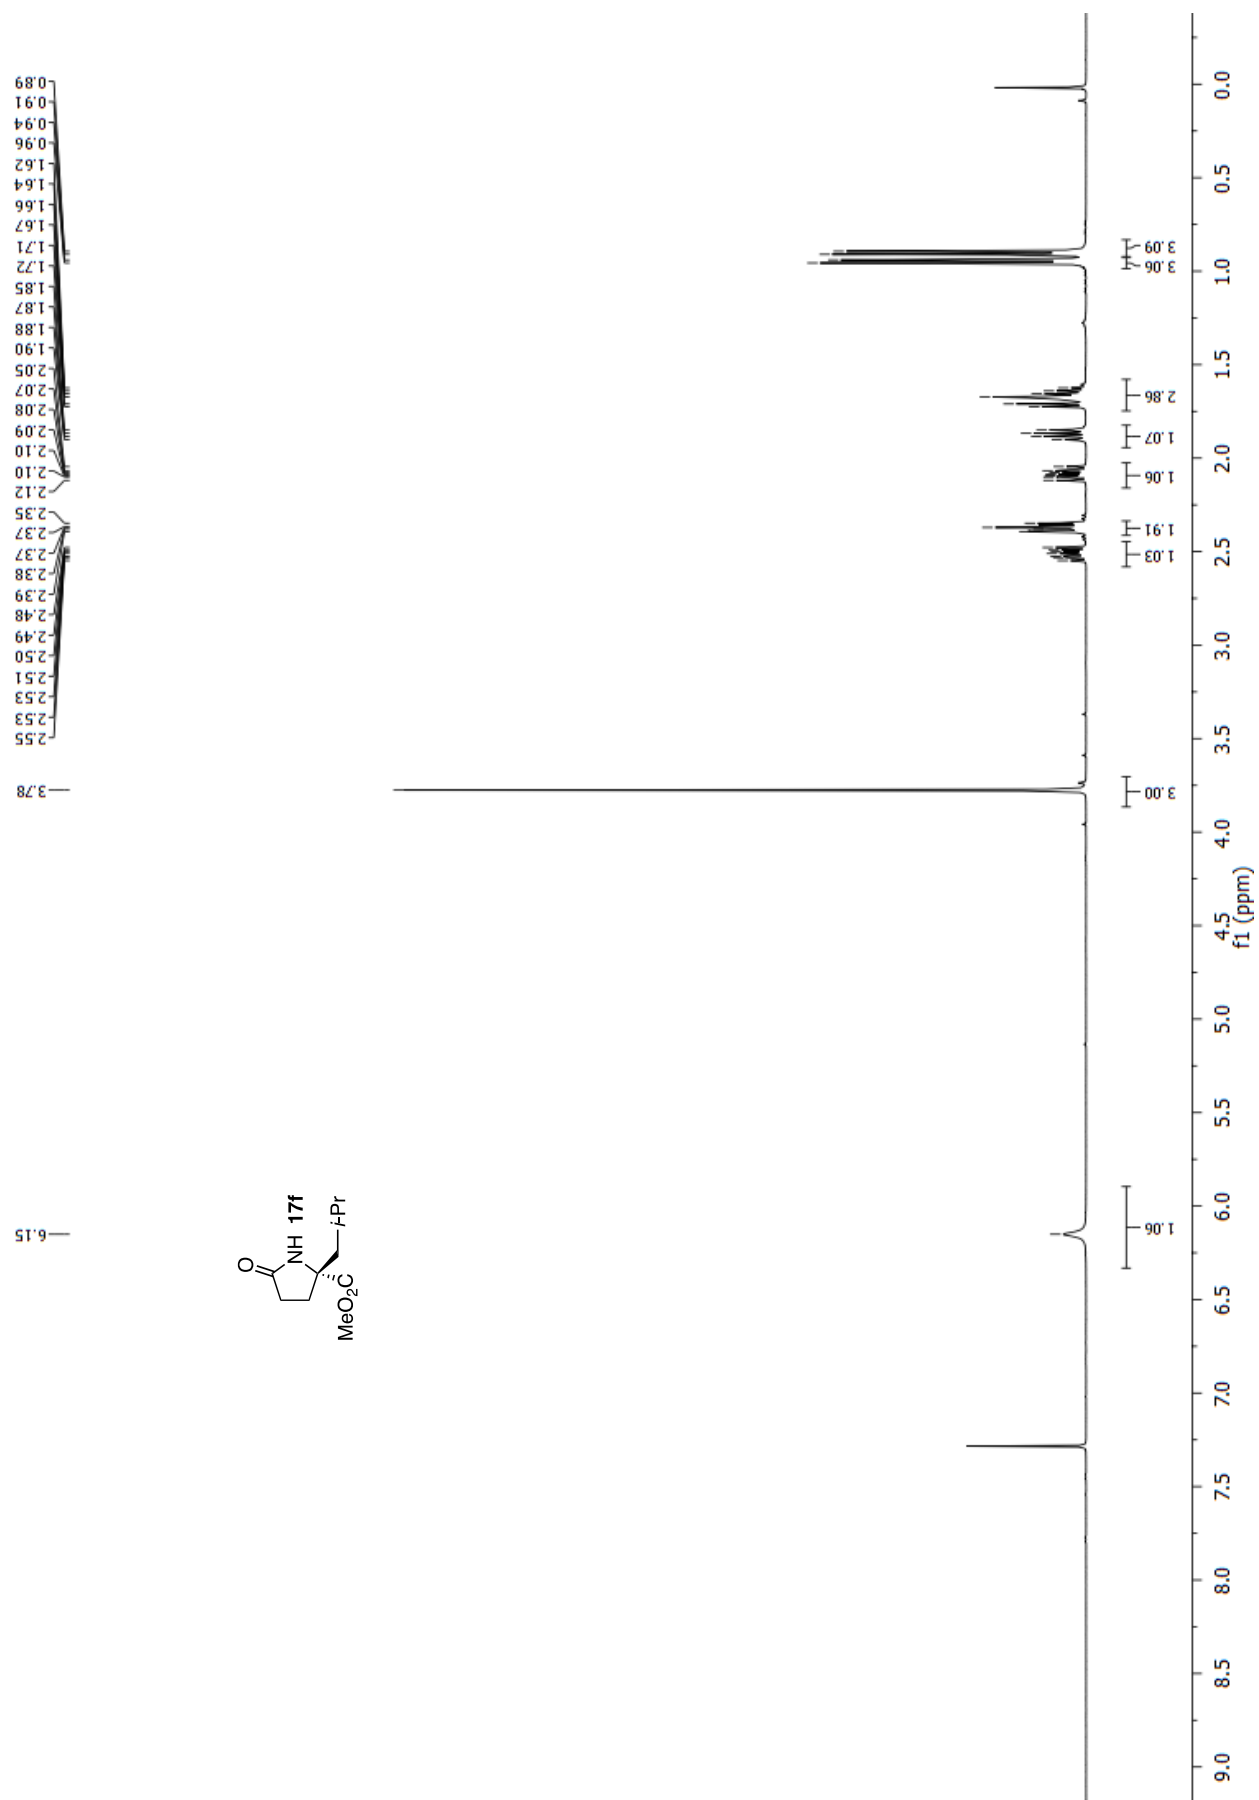

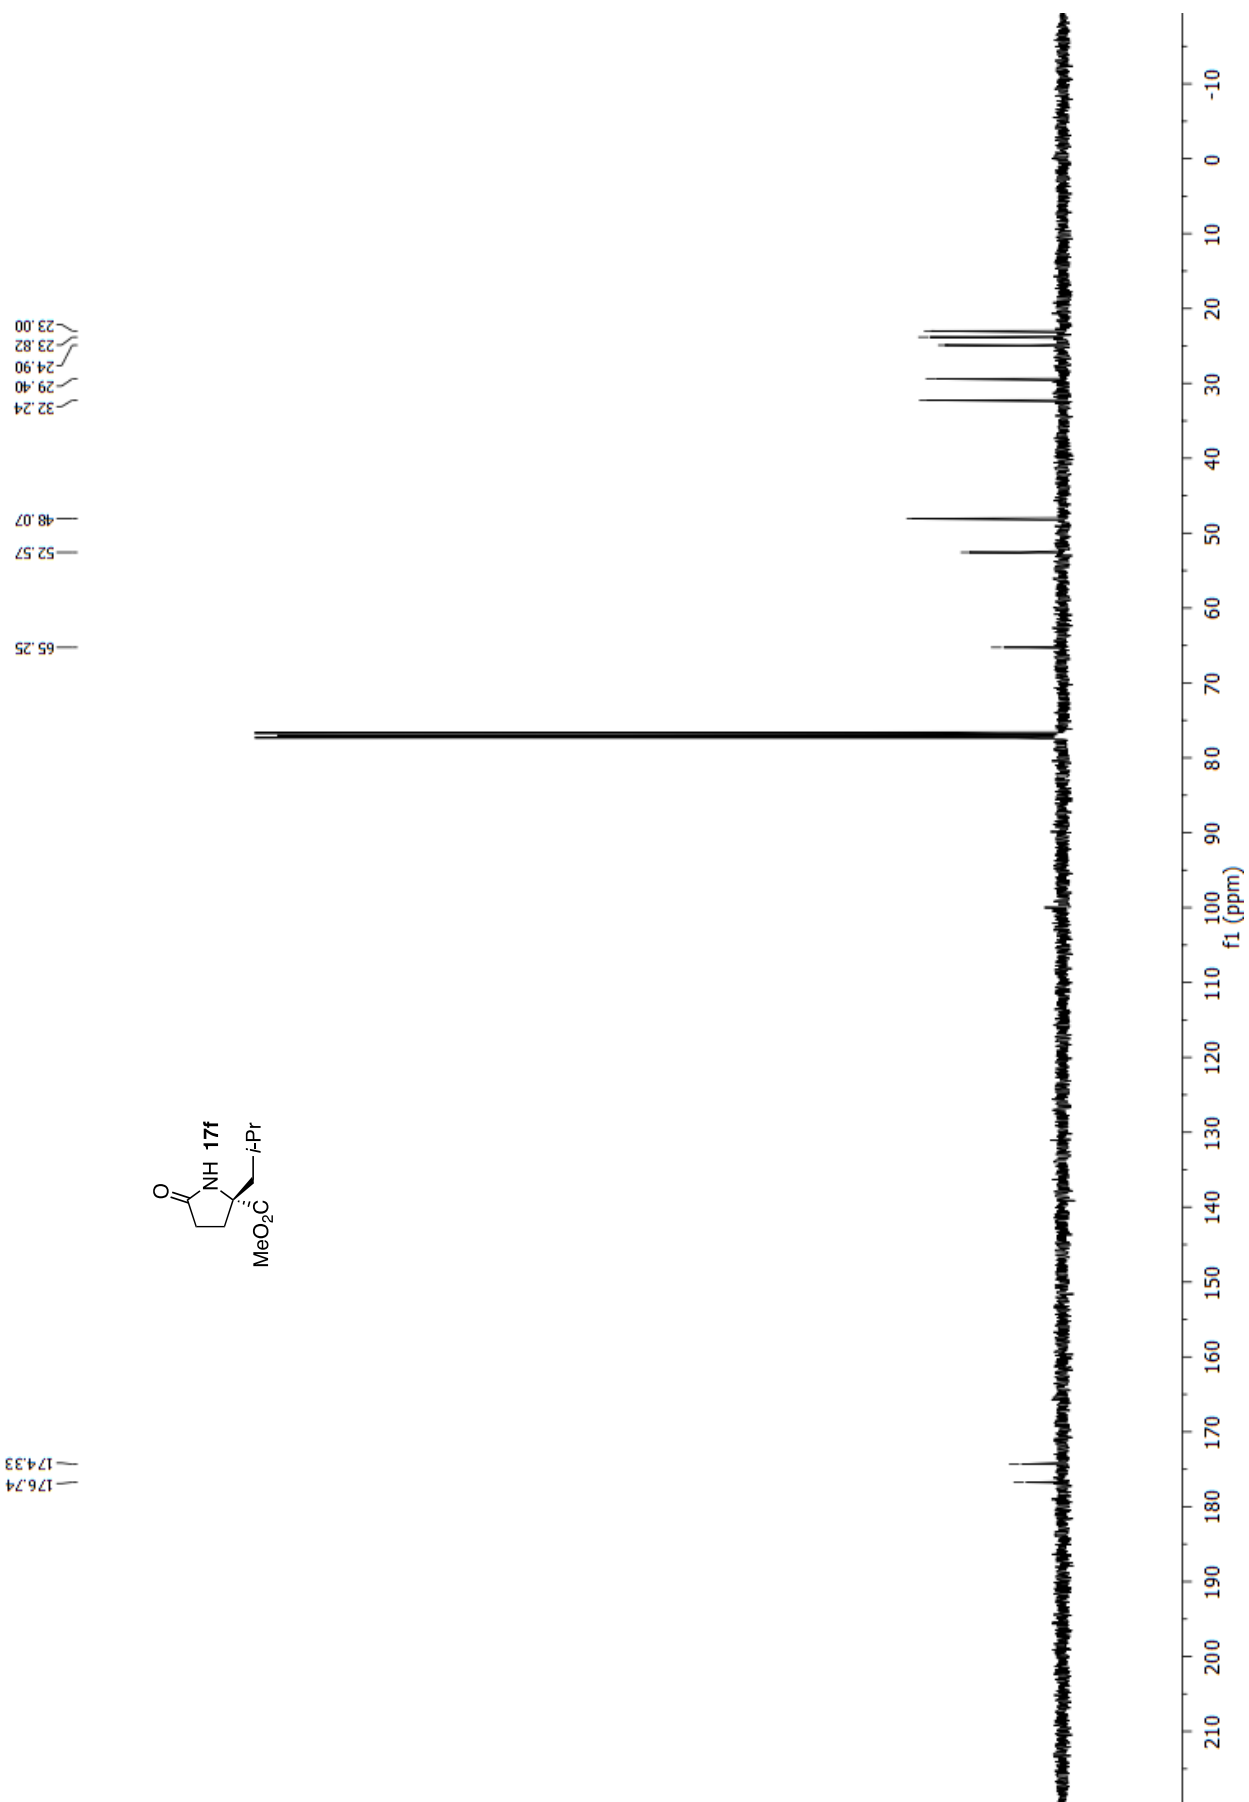

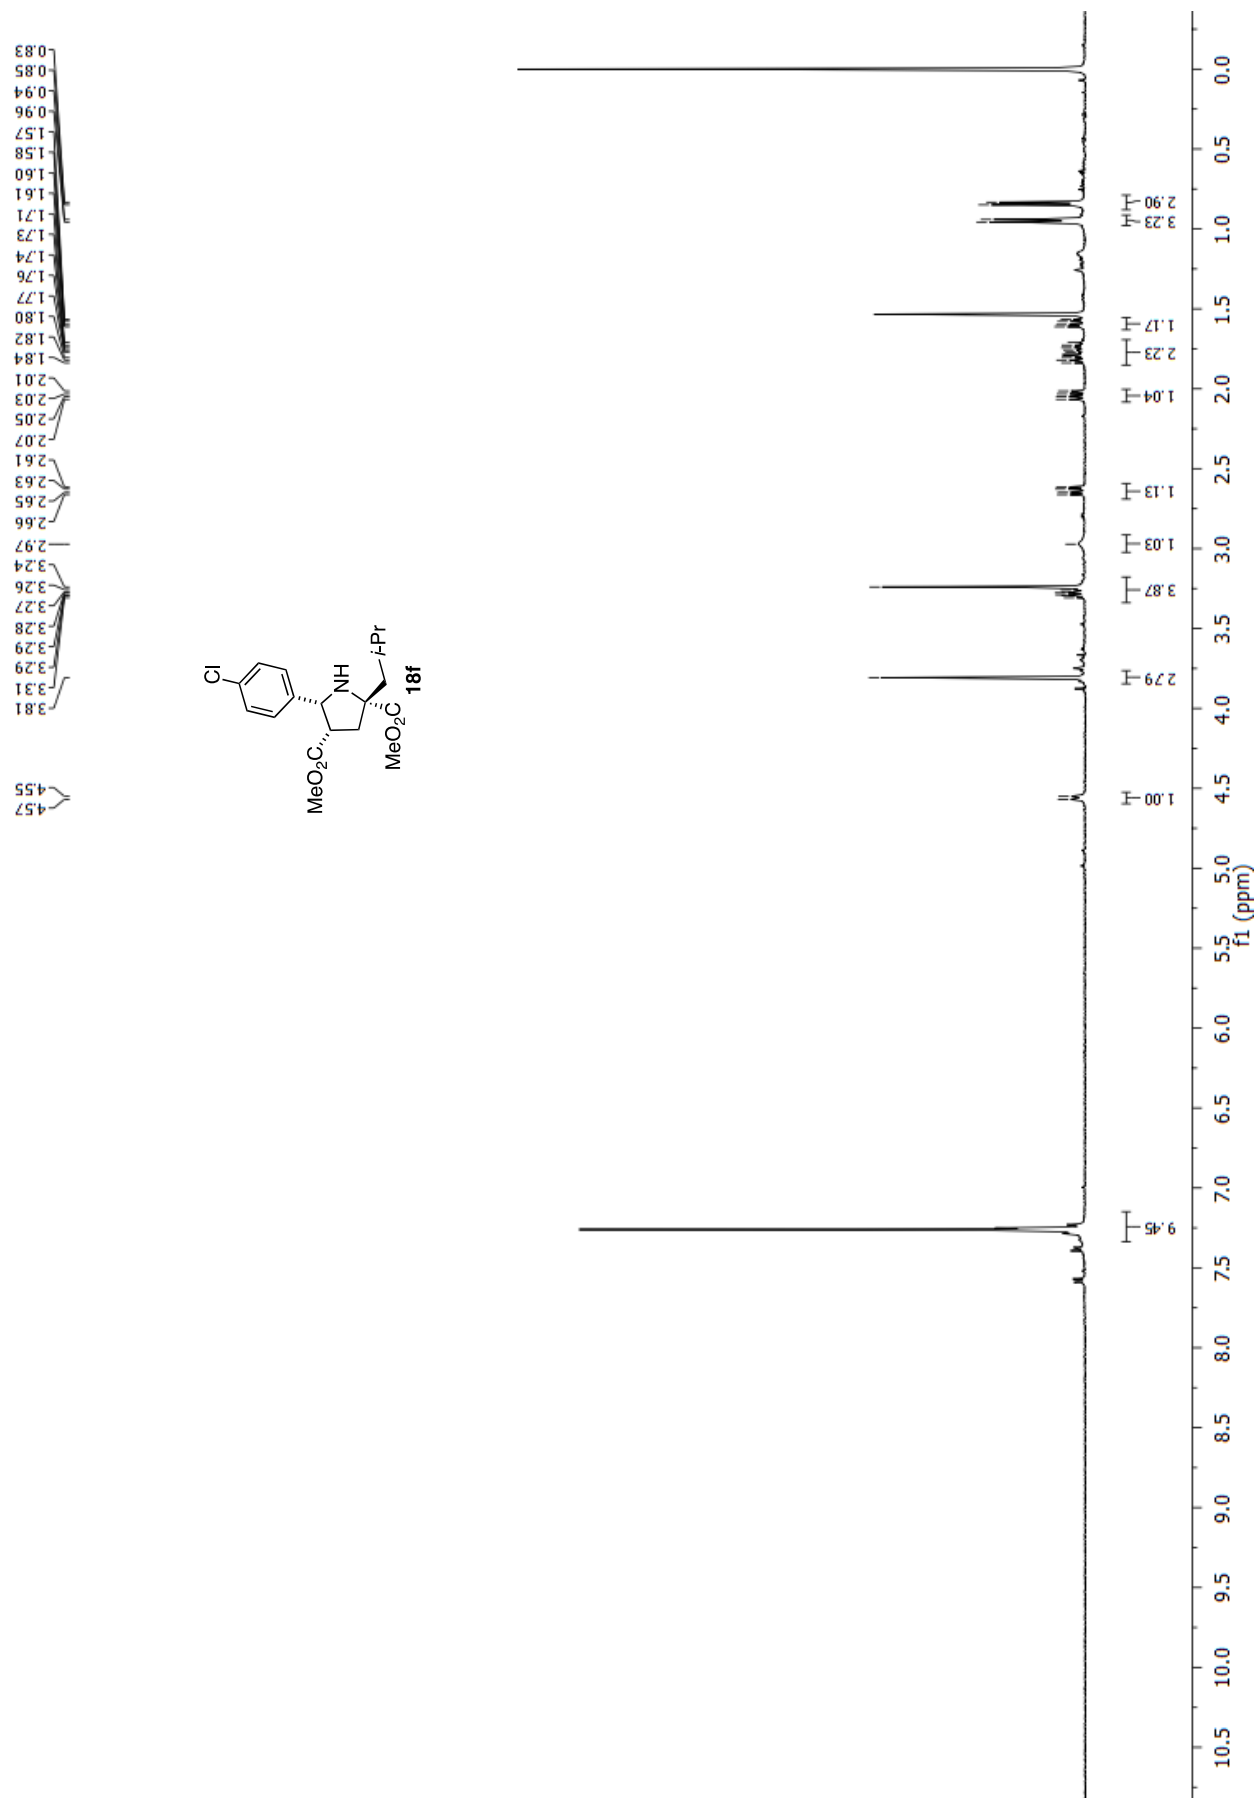

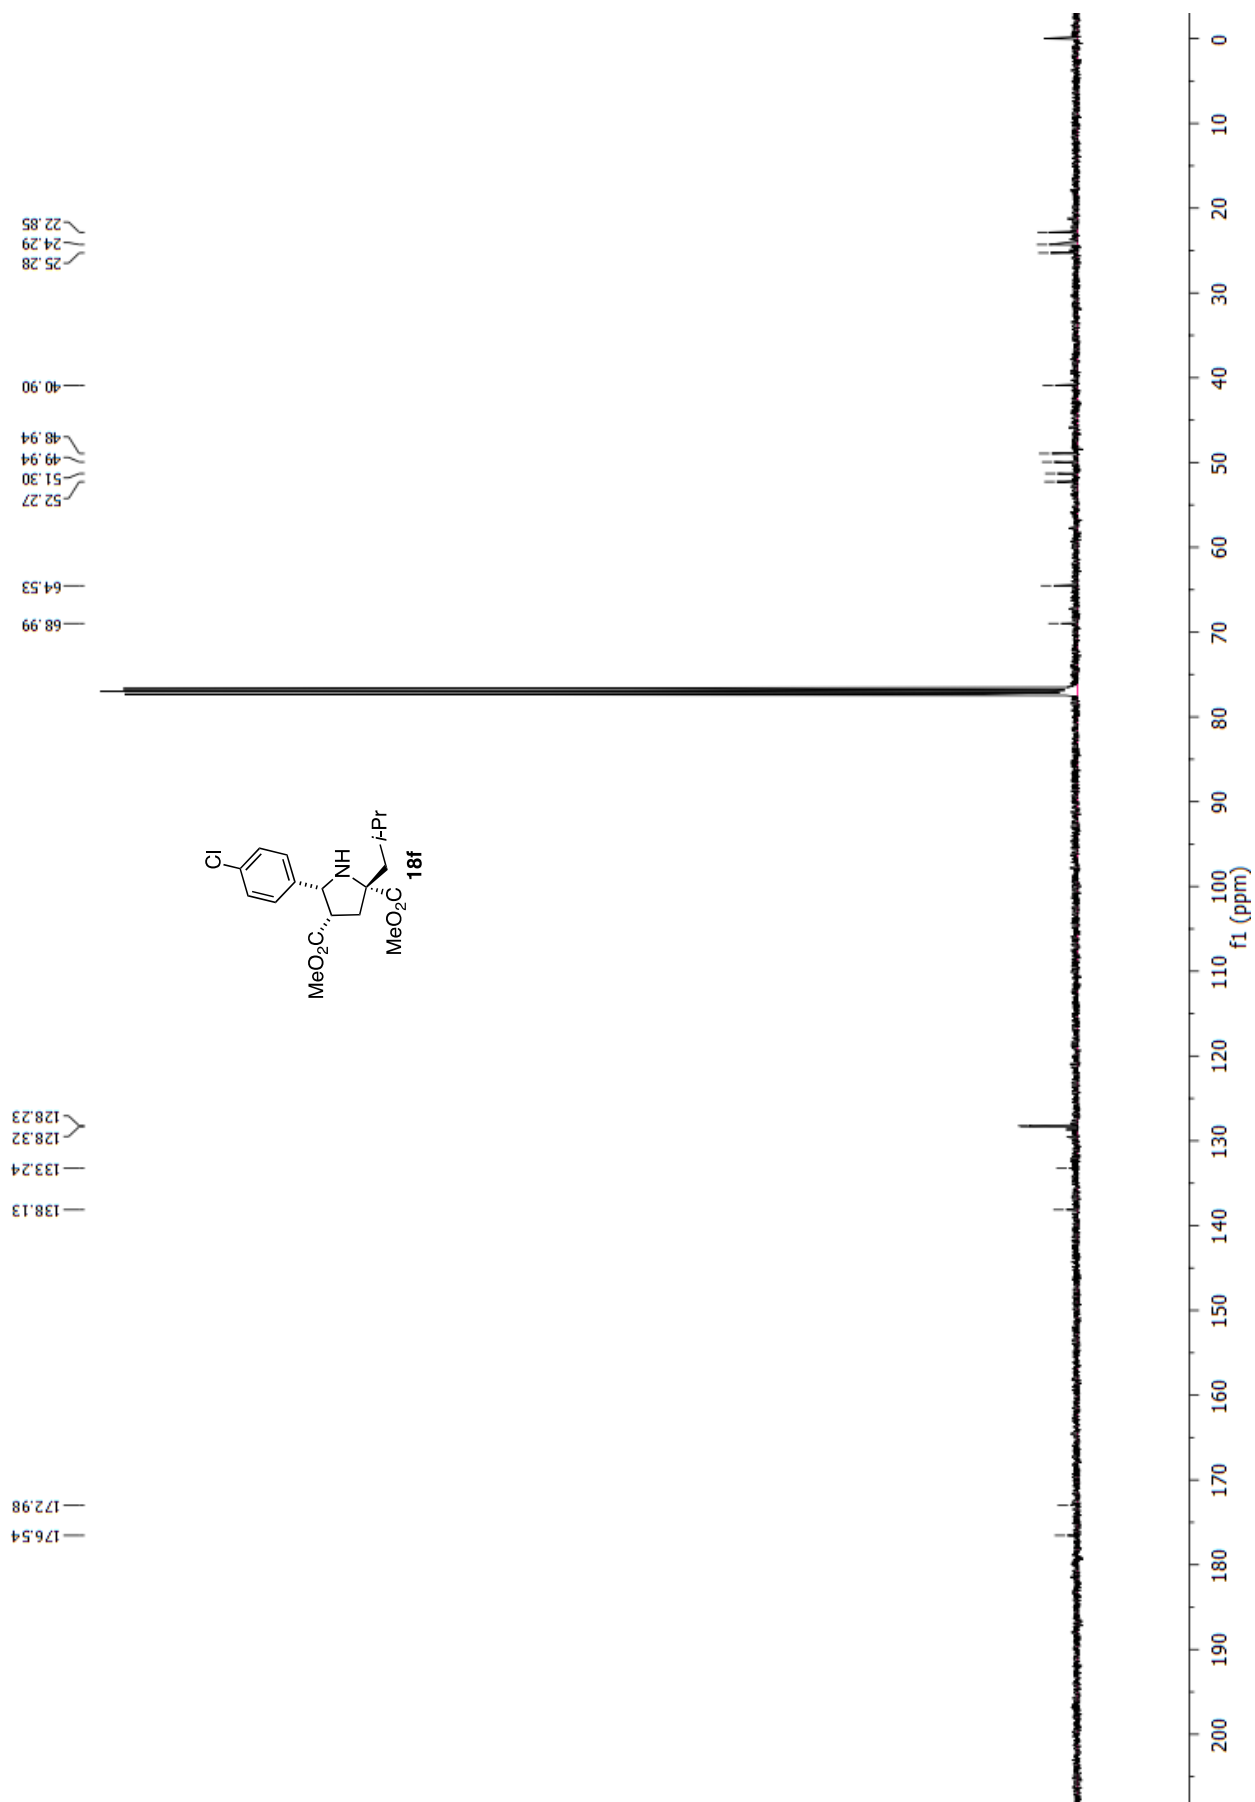

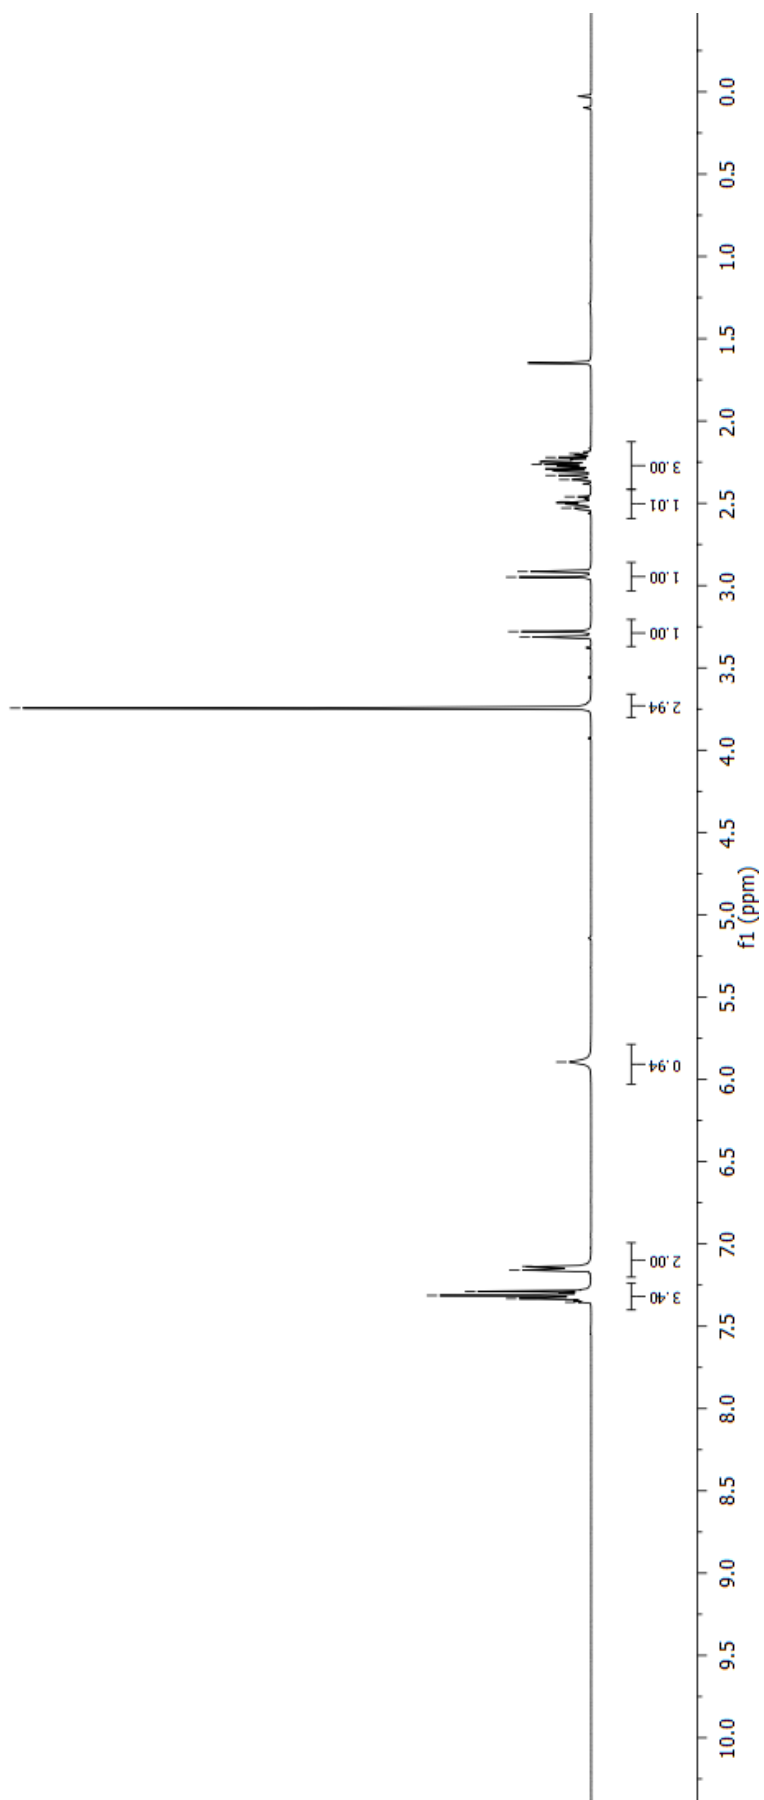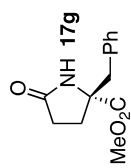

3.74  
3.31  
3.28  
2.95  
2.92  
2.53  
2.49  
2.46  
2.36  
2.33  
2.26  
2.22  
2.20

5.89

7.35  
7.33  
7.31  
7.29  
7.16  
7.14

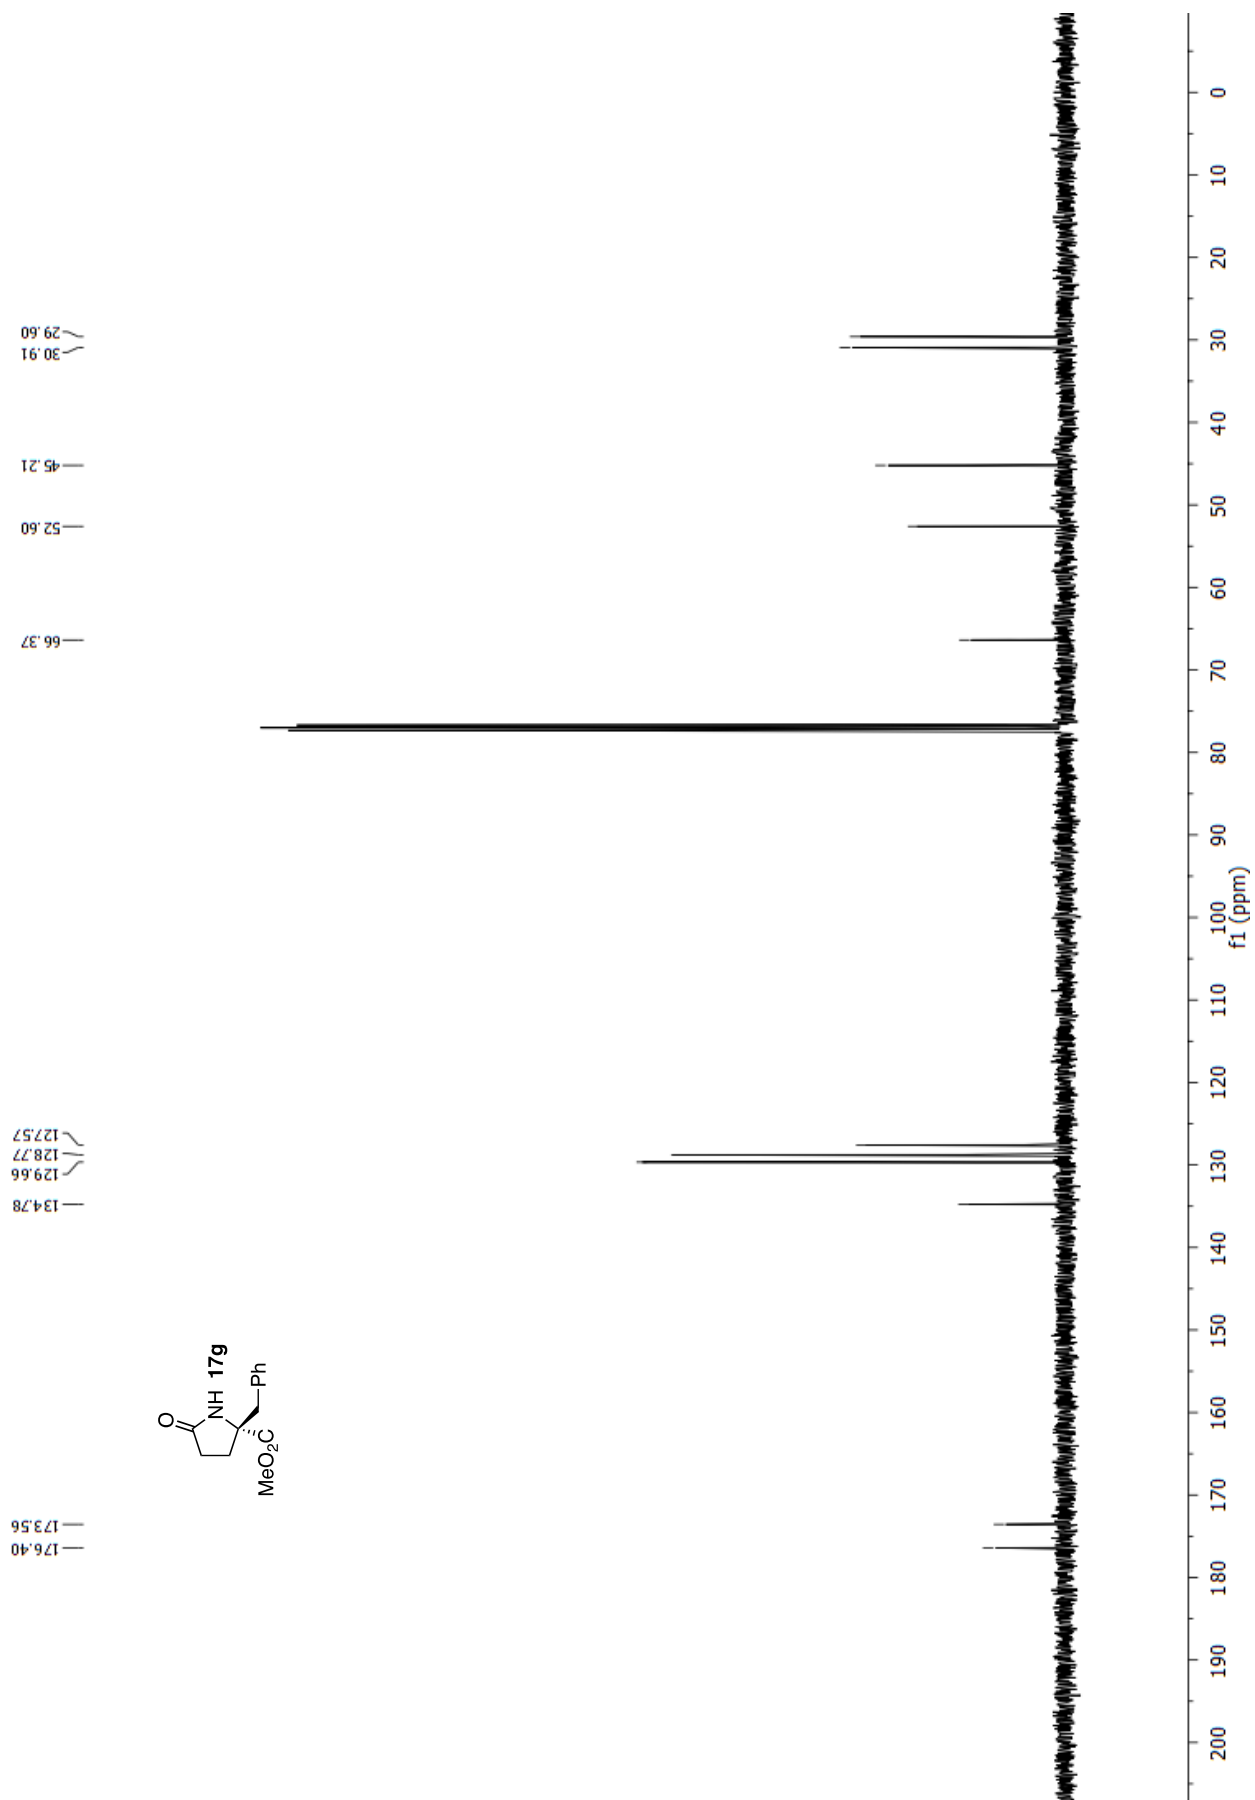



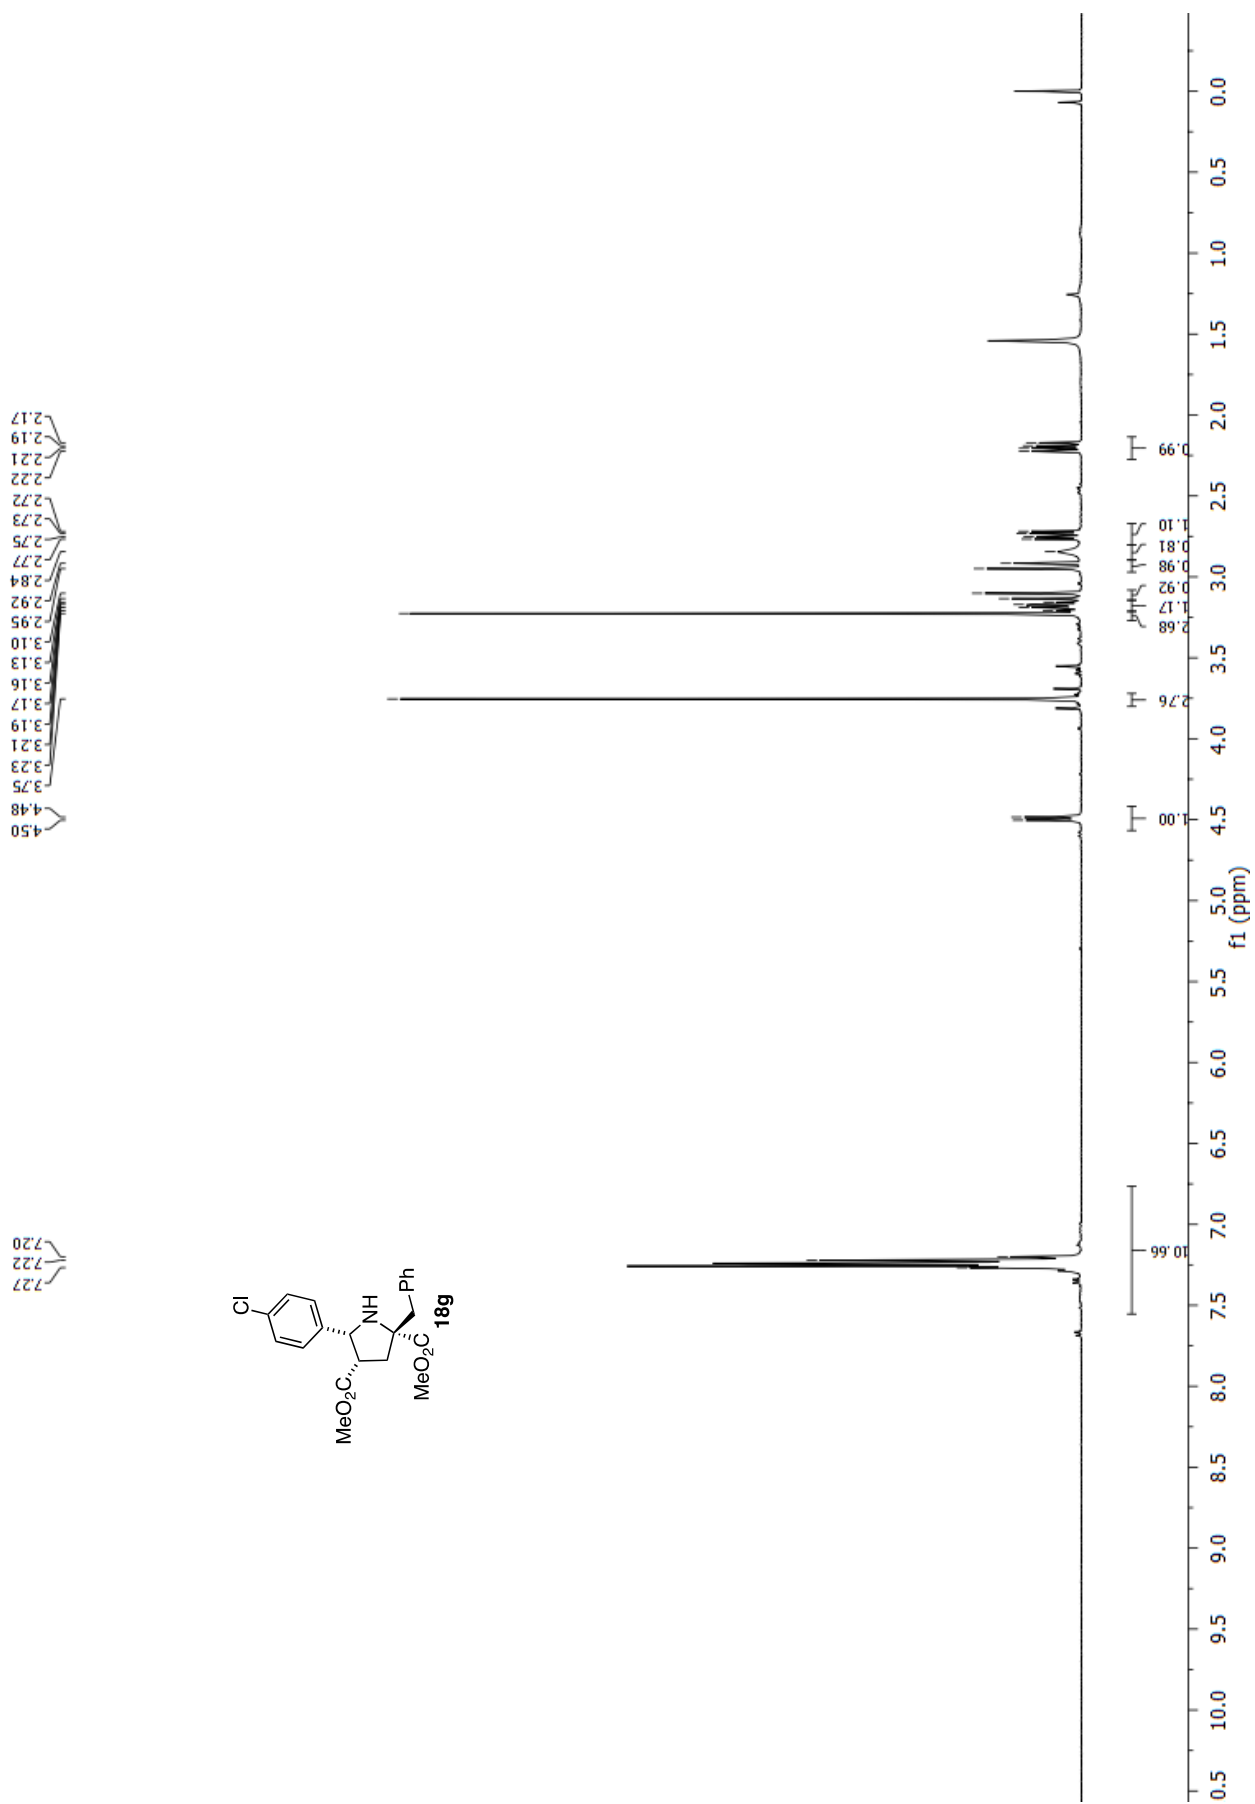

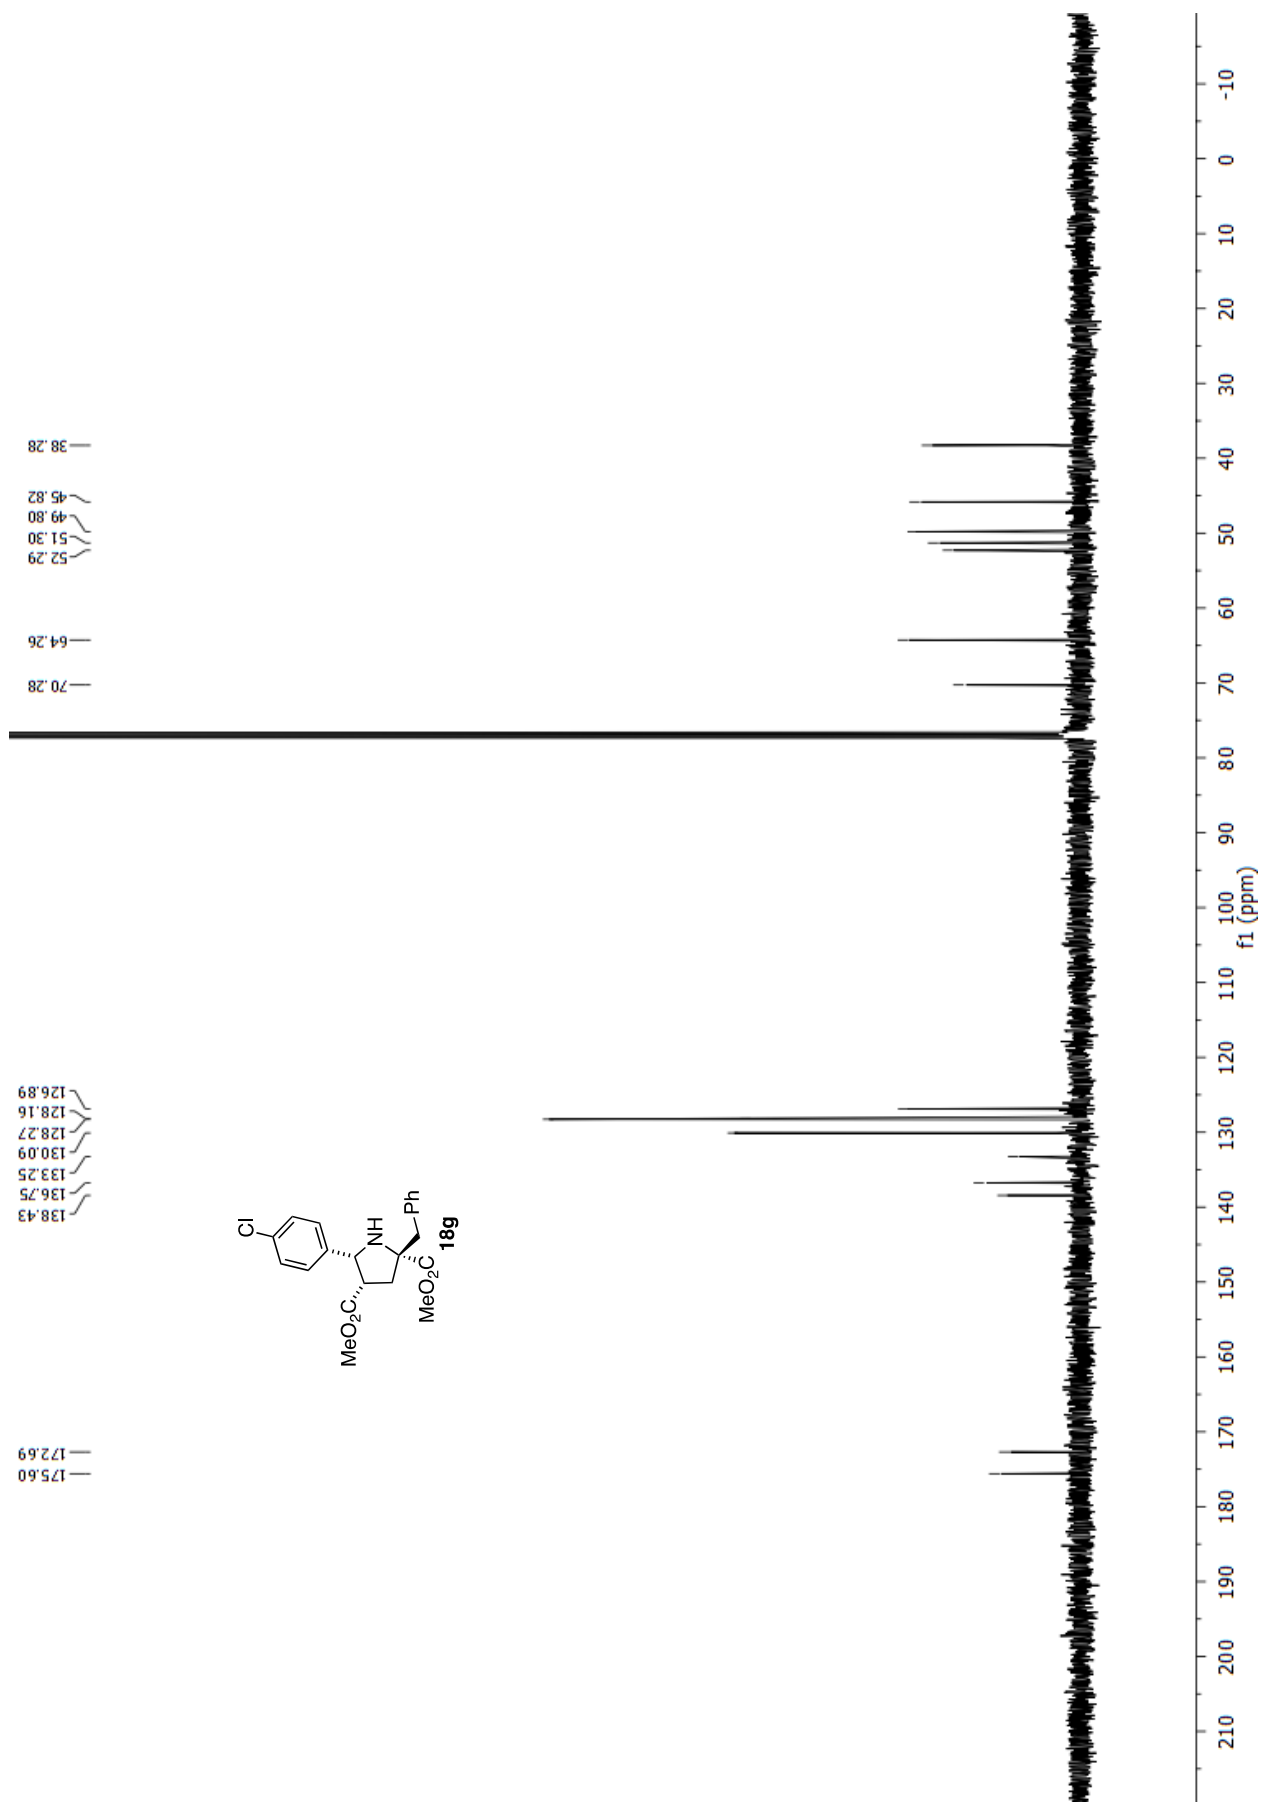

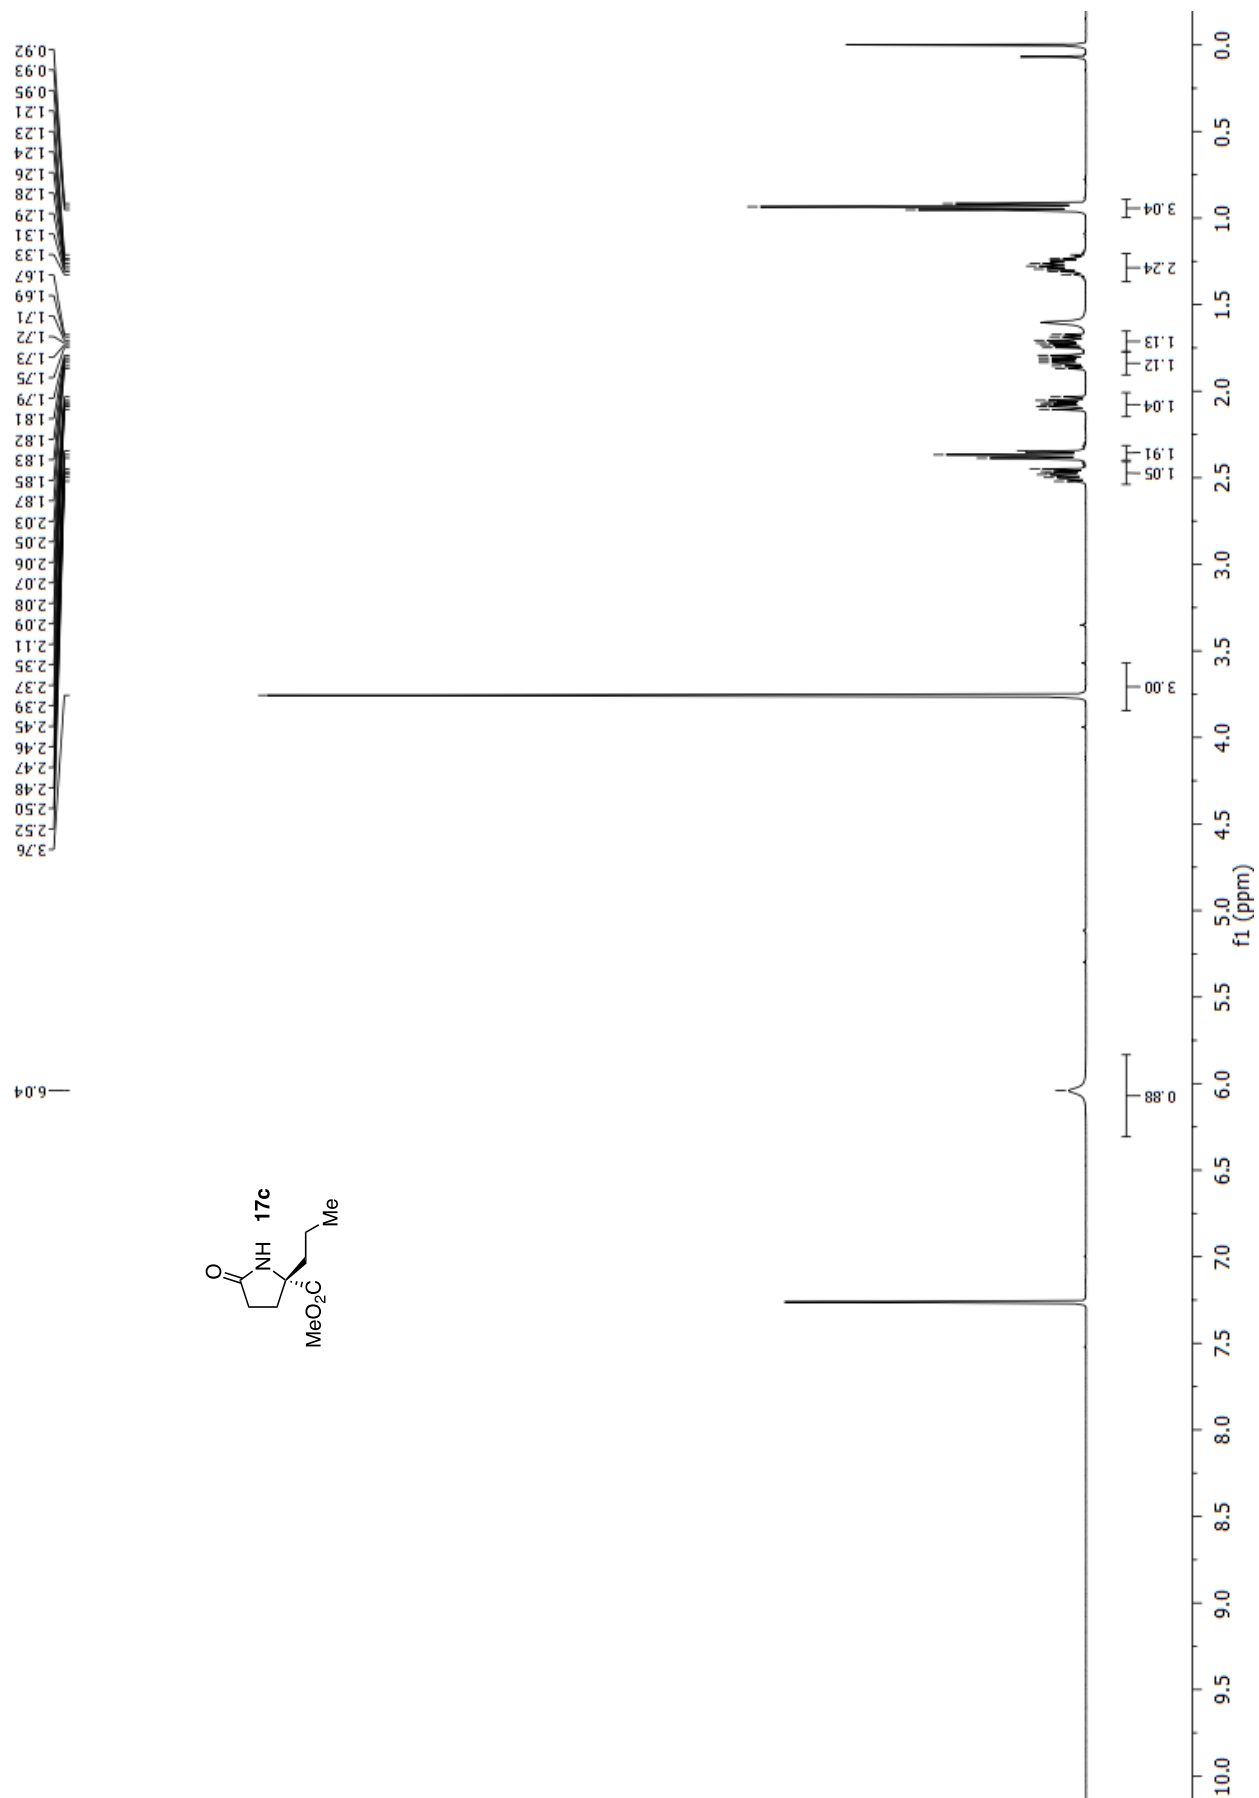

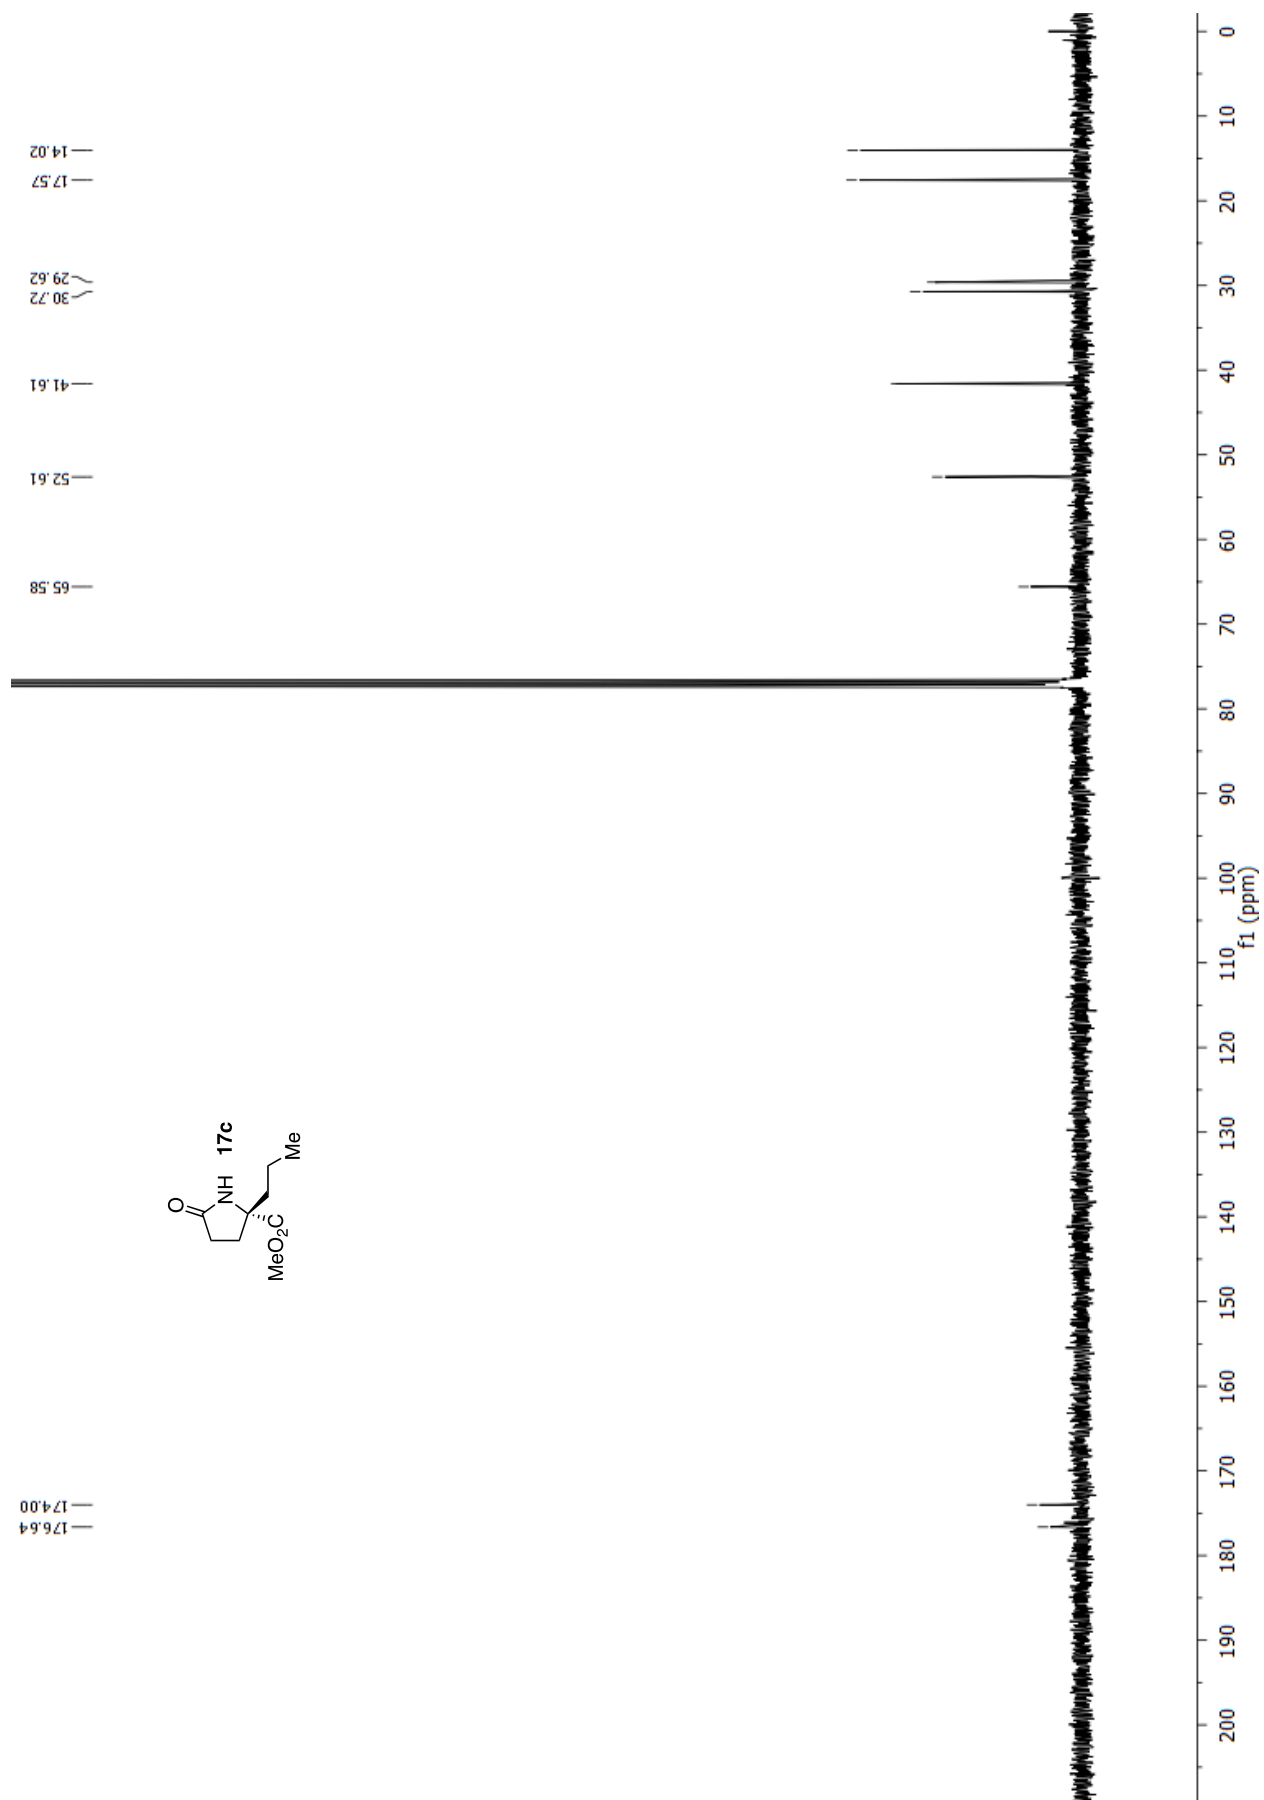

3.93  
3.86

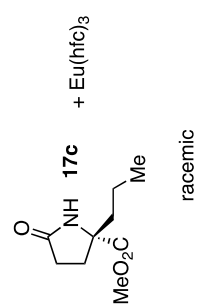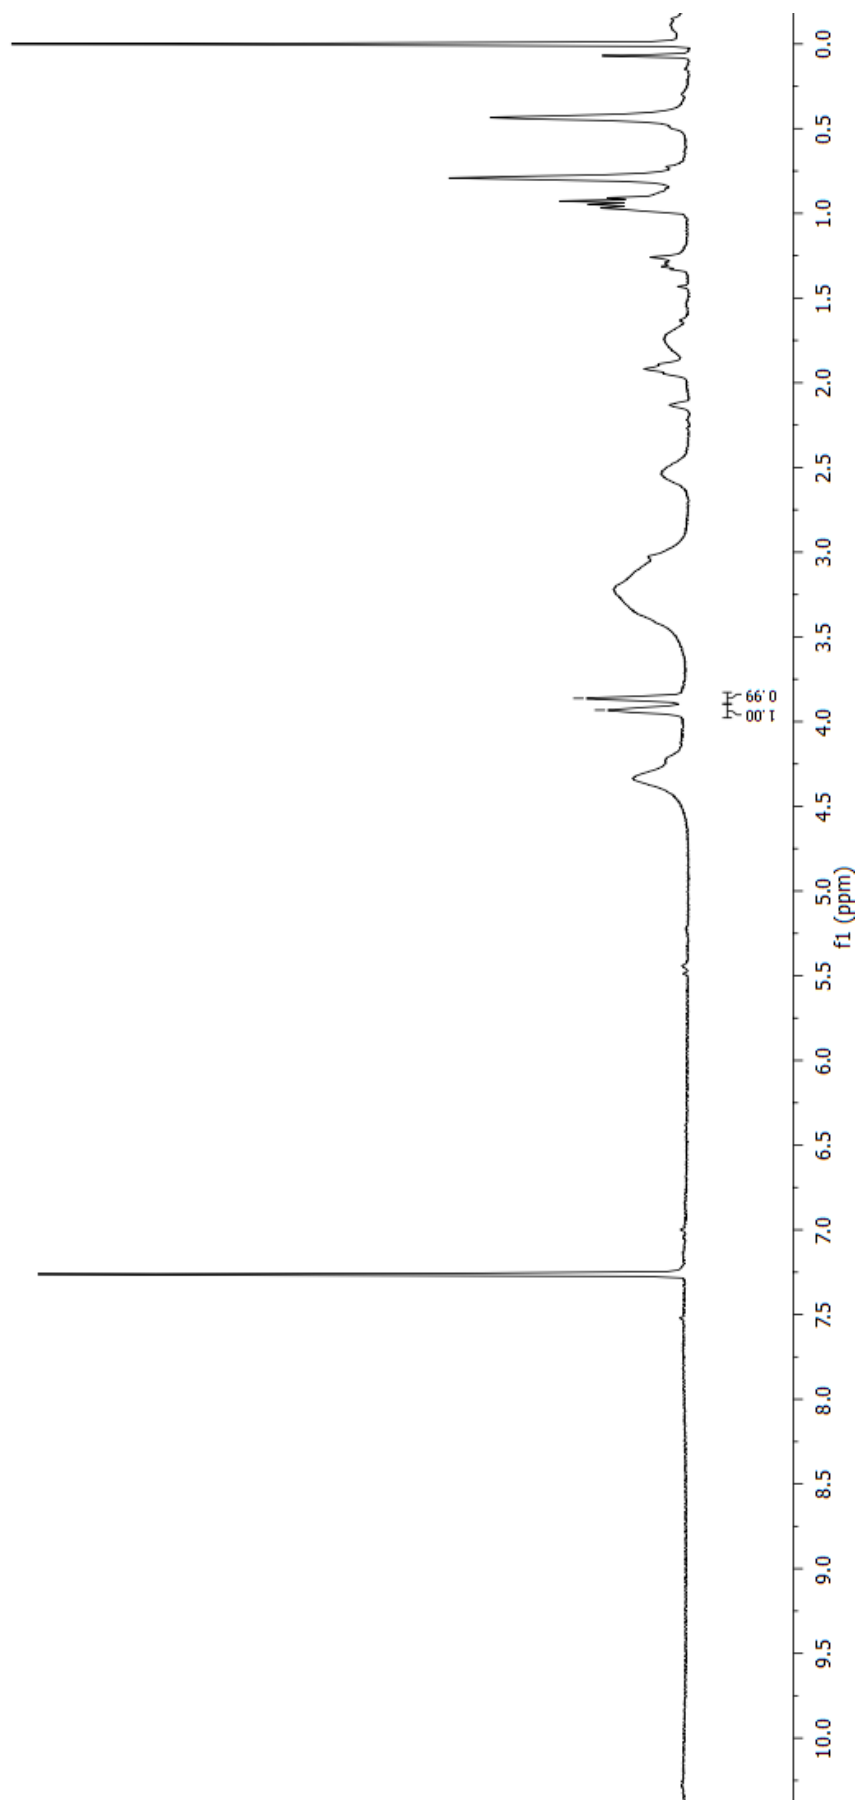

3.94  
3.86

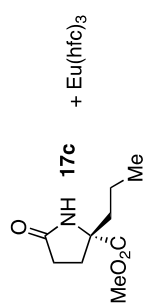

scalemic

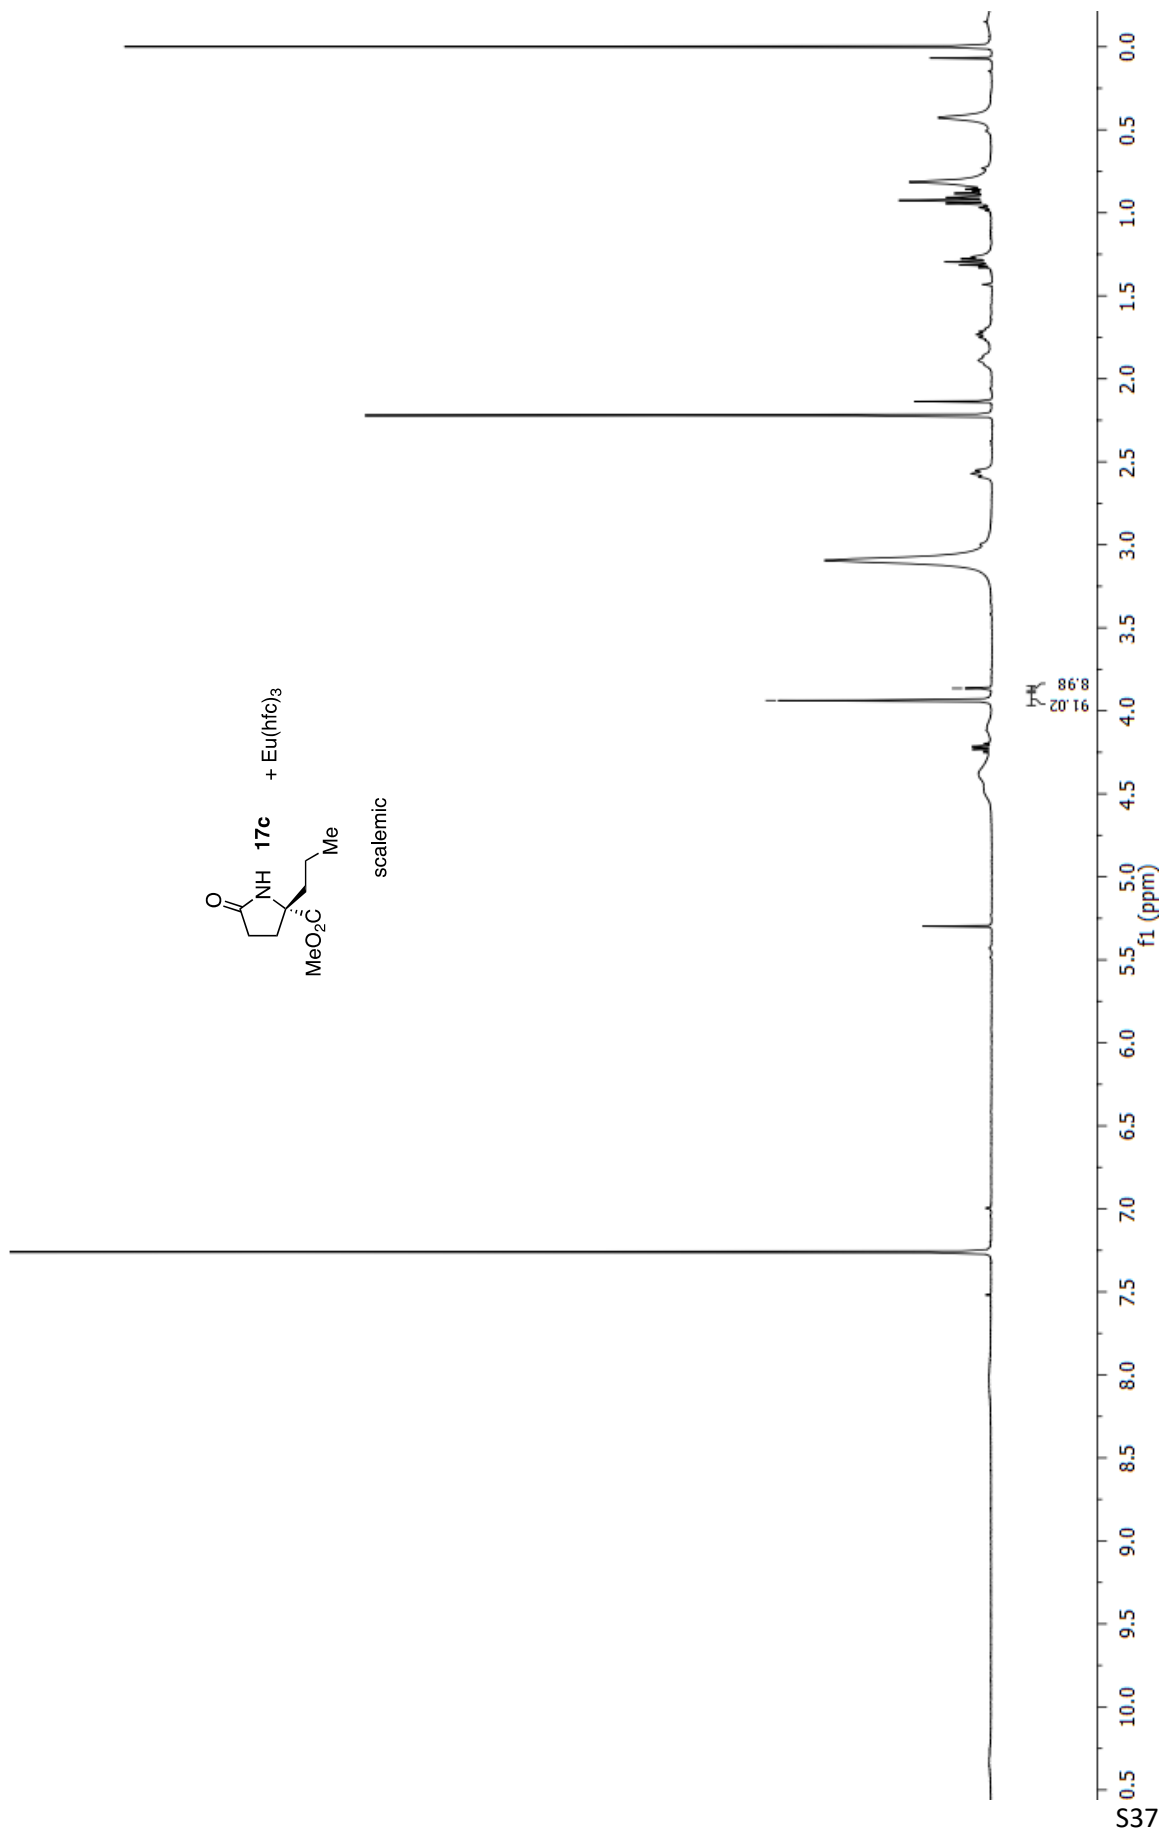

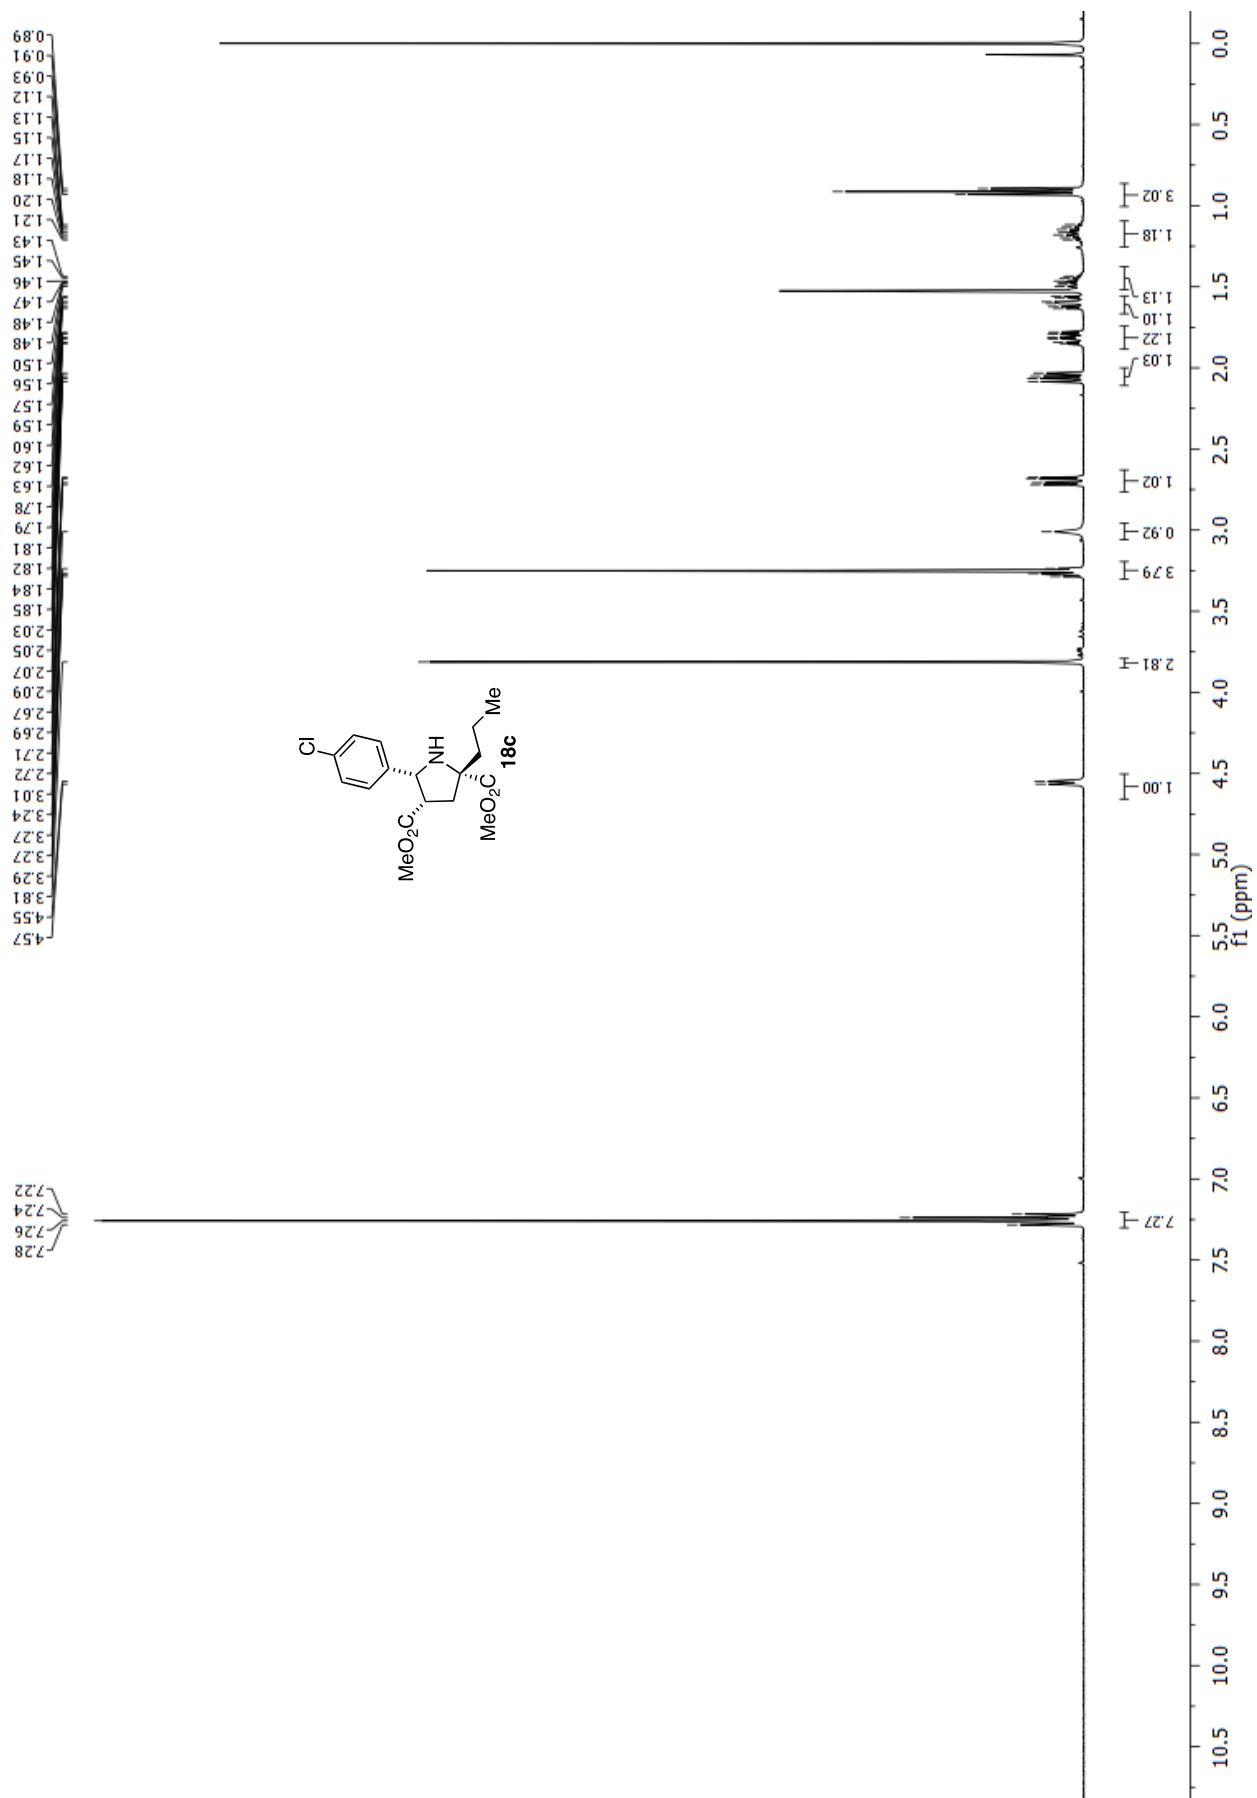

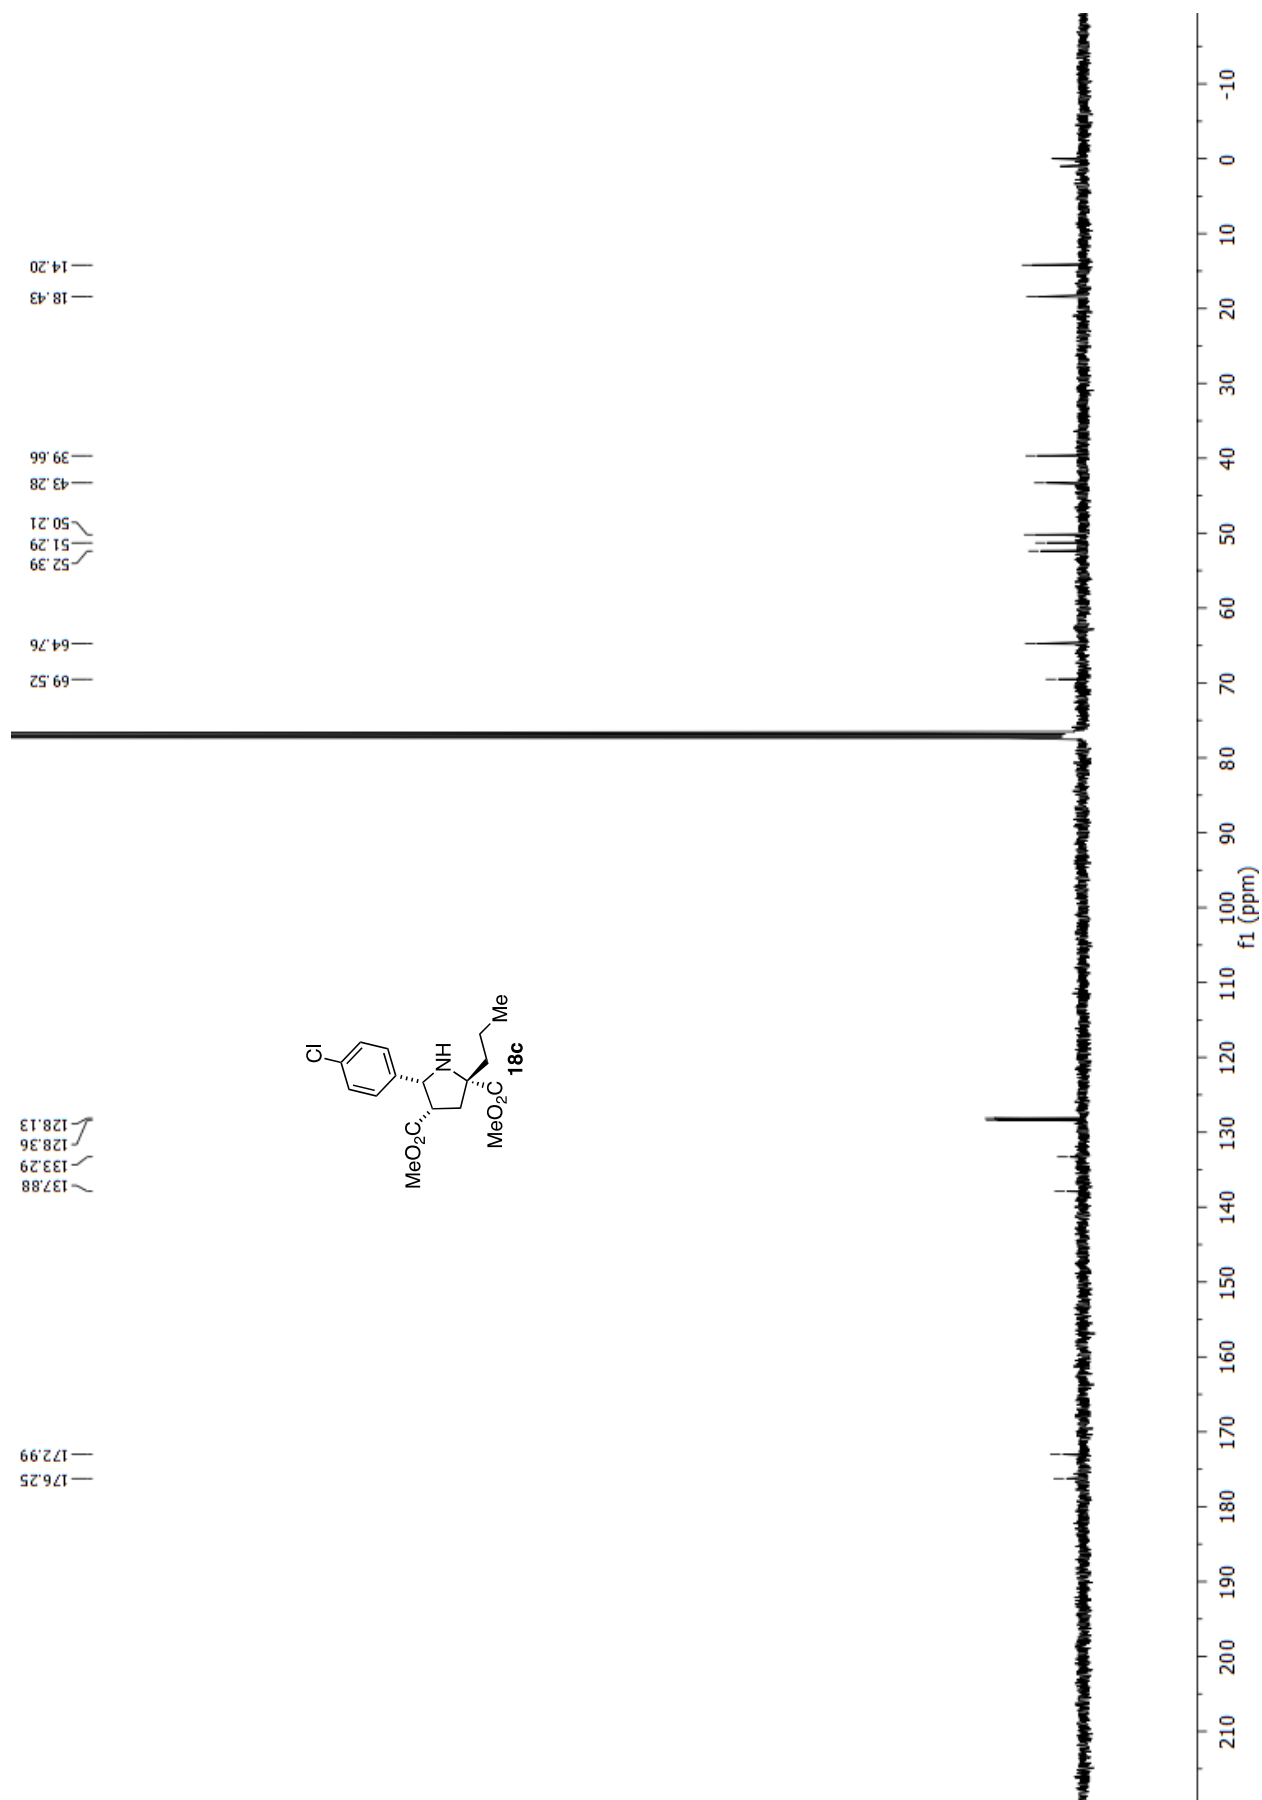



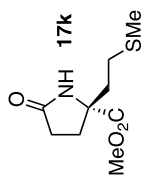

1.98  
 2.00  
 2.02  
 2.02  
 2.04  
 2.06  
 2.06  
 2.09  
 2.10  
 2.11  
 2.12  
 2.14  
 2.18  
 2.20  
 2.22  
 2.24  
 2.26  
 2.36  
 2.38  
 2.40  
 2.45  
 2.47  
 2.48  
 2.48  
 3.78

6.51

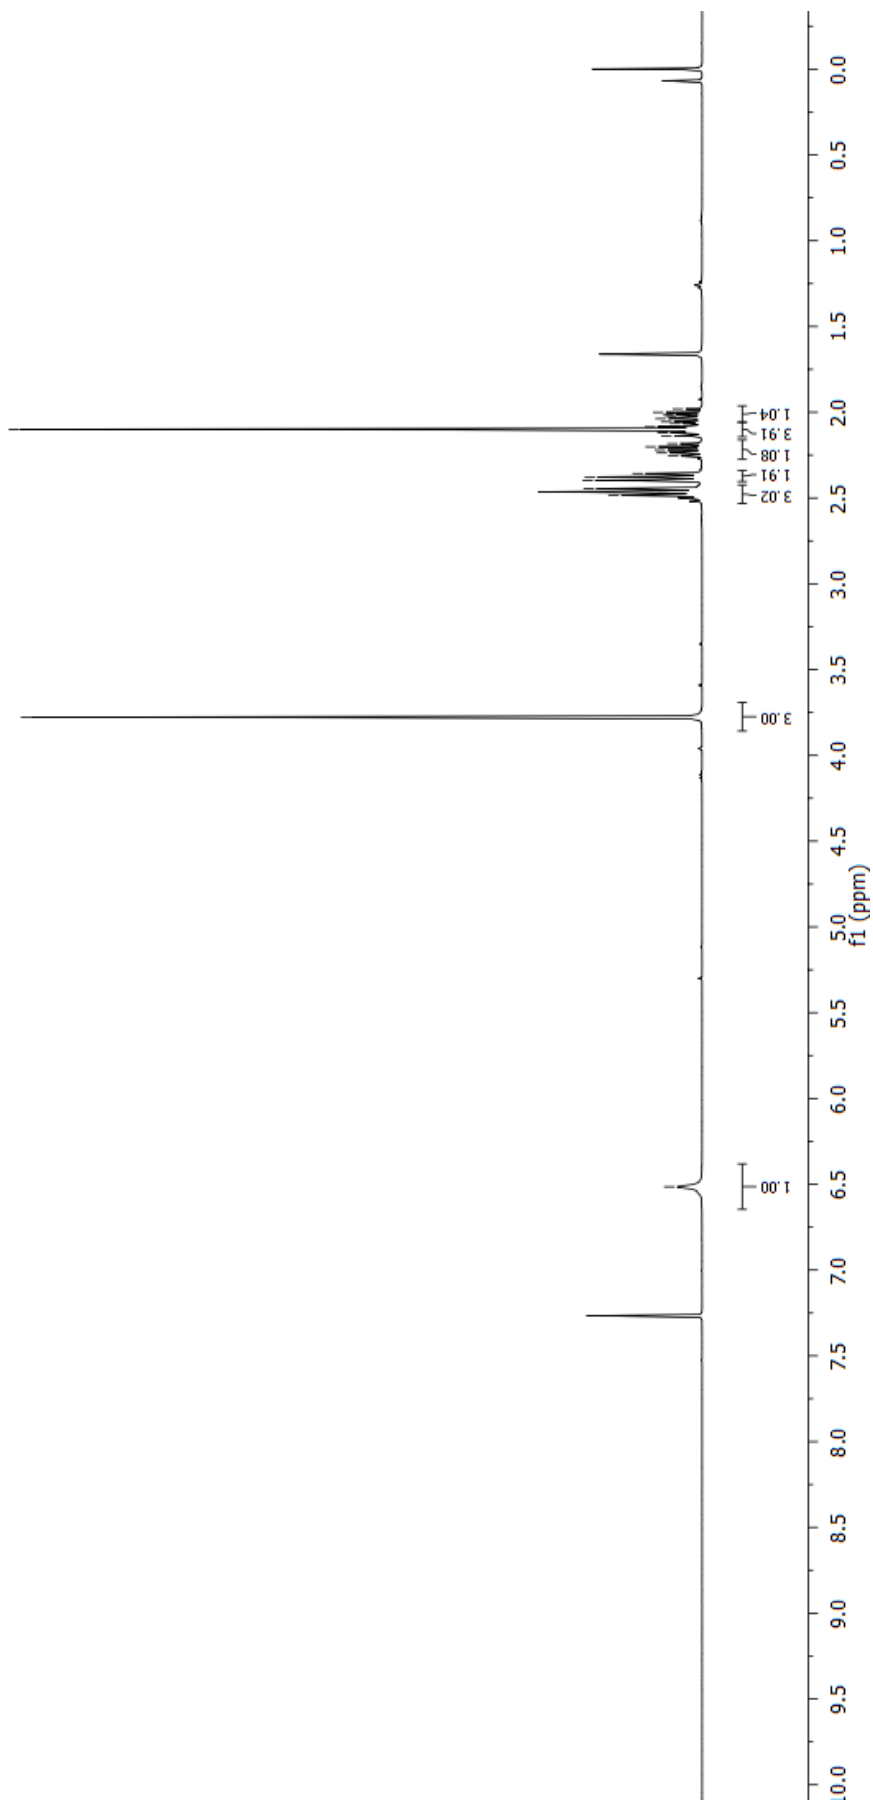

— 176.84  
— 173.58

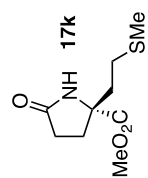

— 65.24  
— 52.85  
— 38.26  
31.27  
29.36  
28.95  
— 15.58

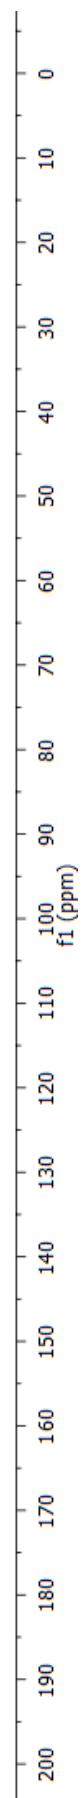

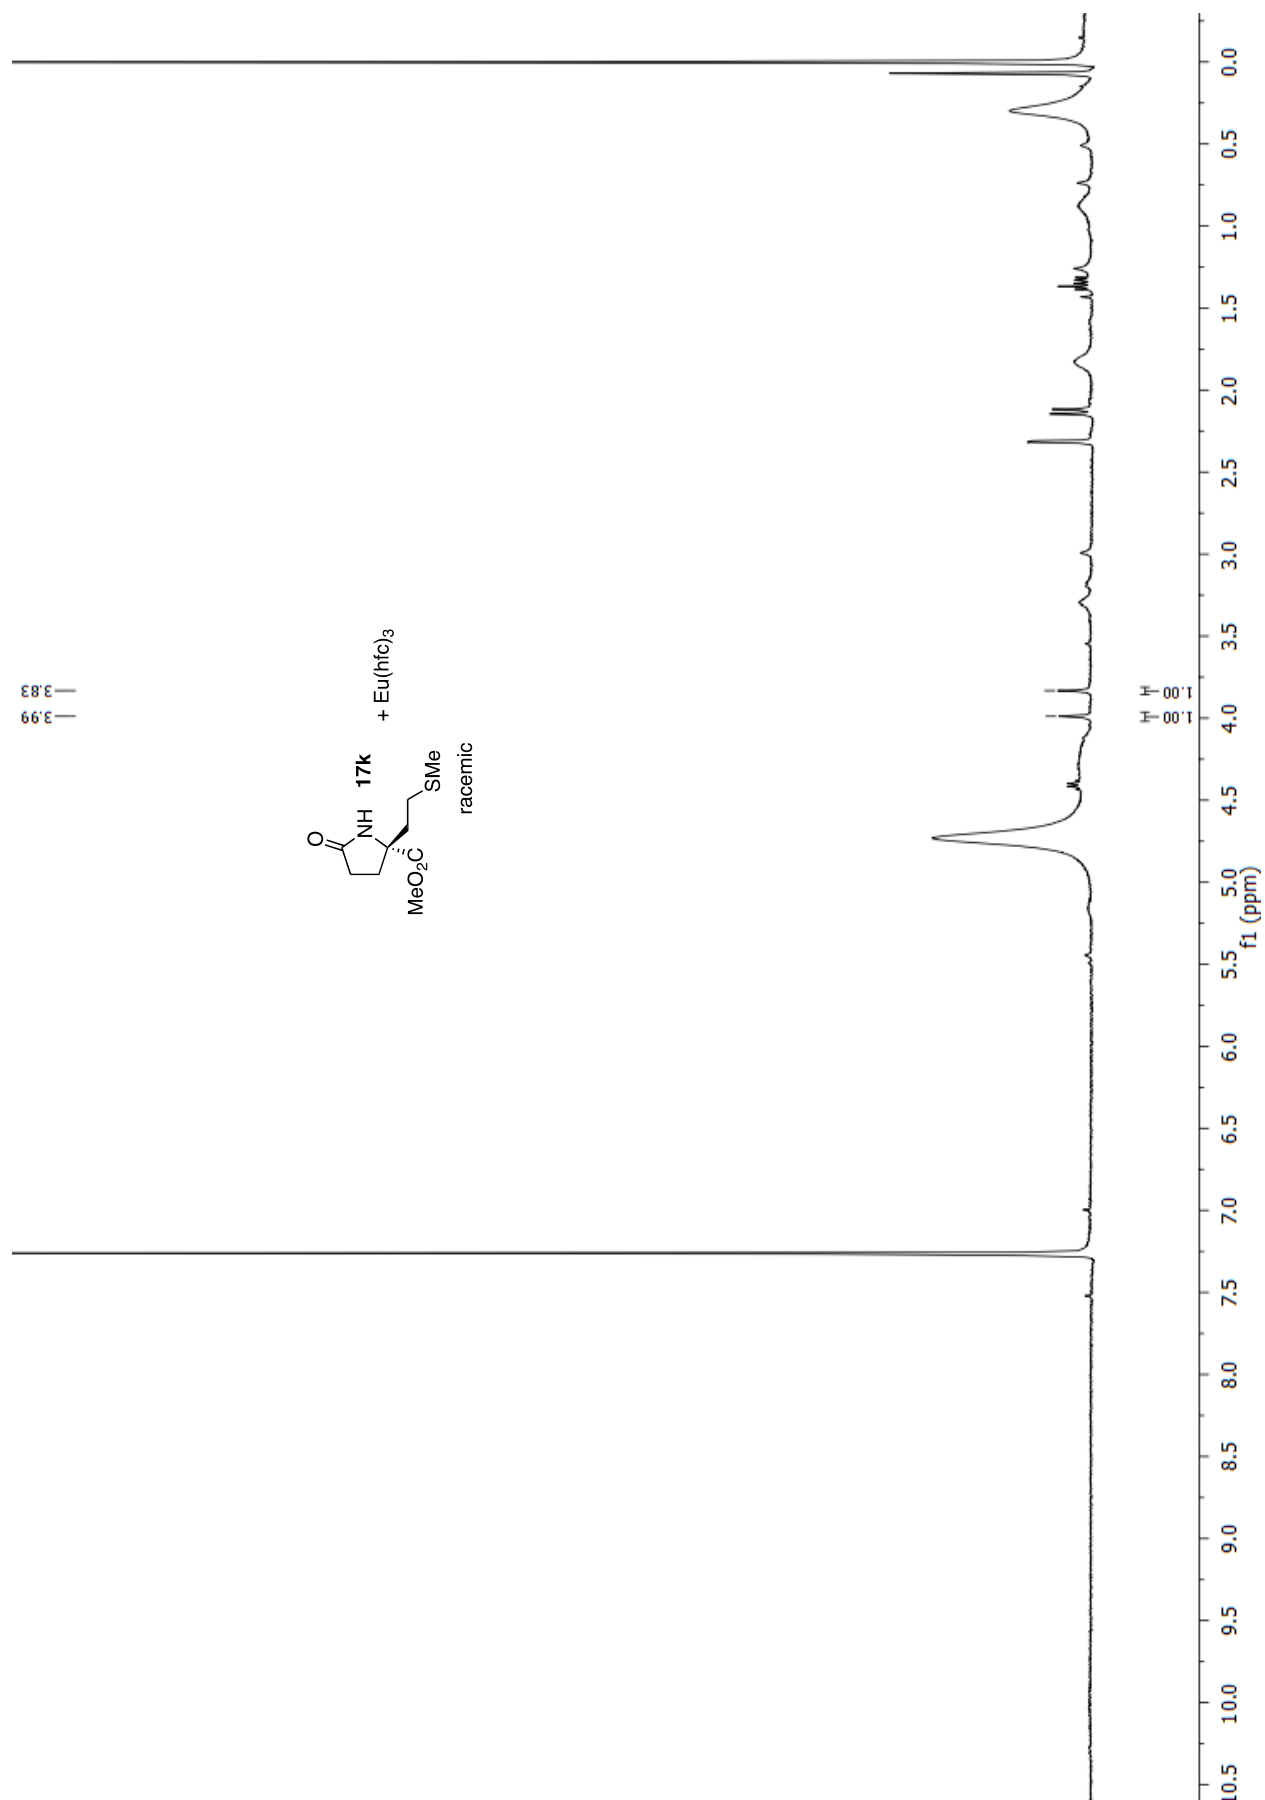

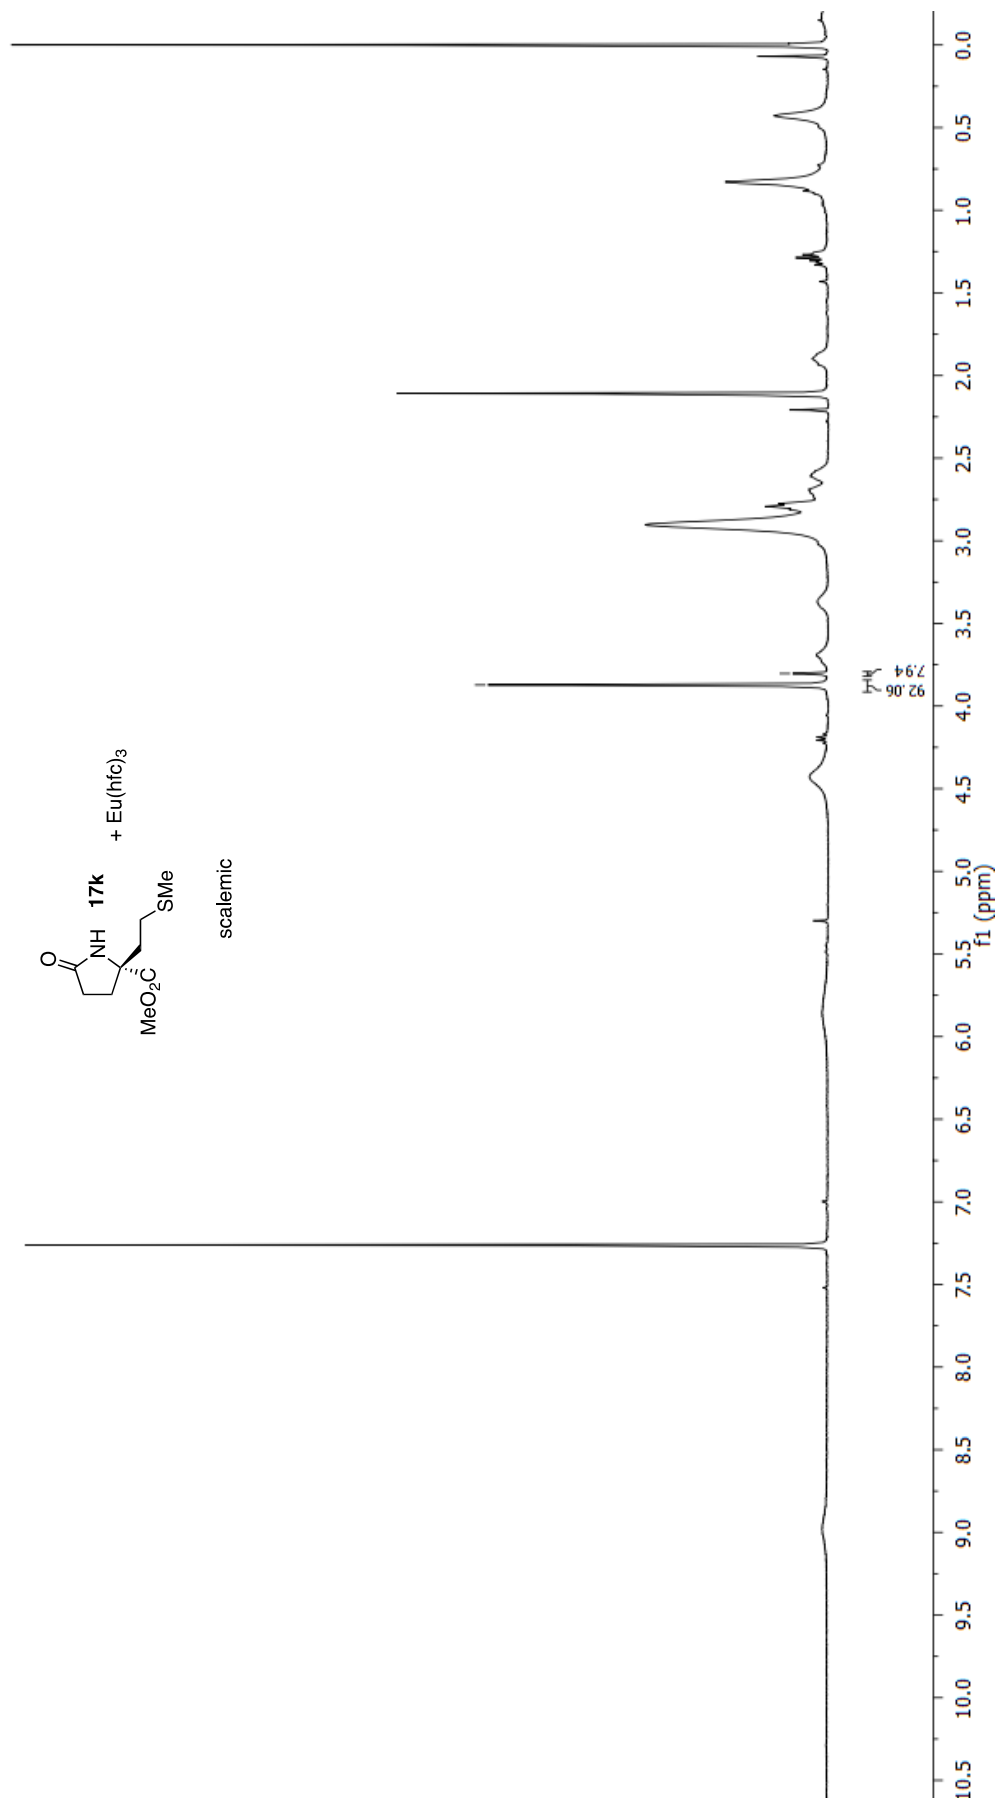

3.87  
3.80

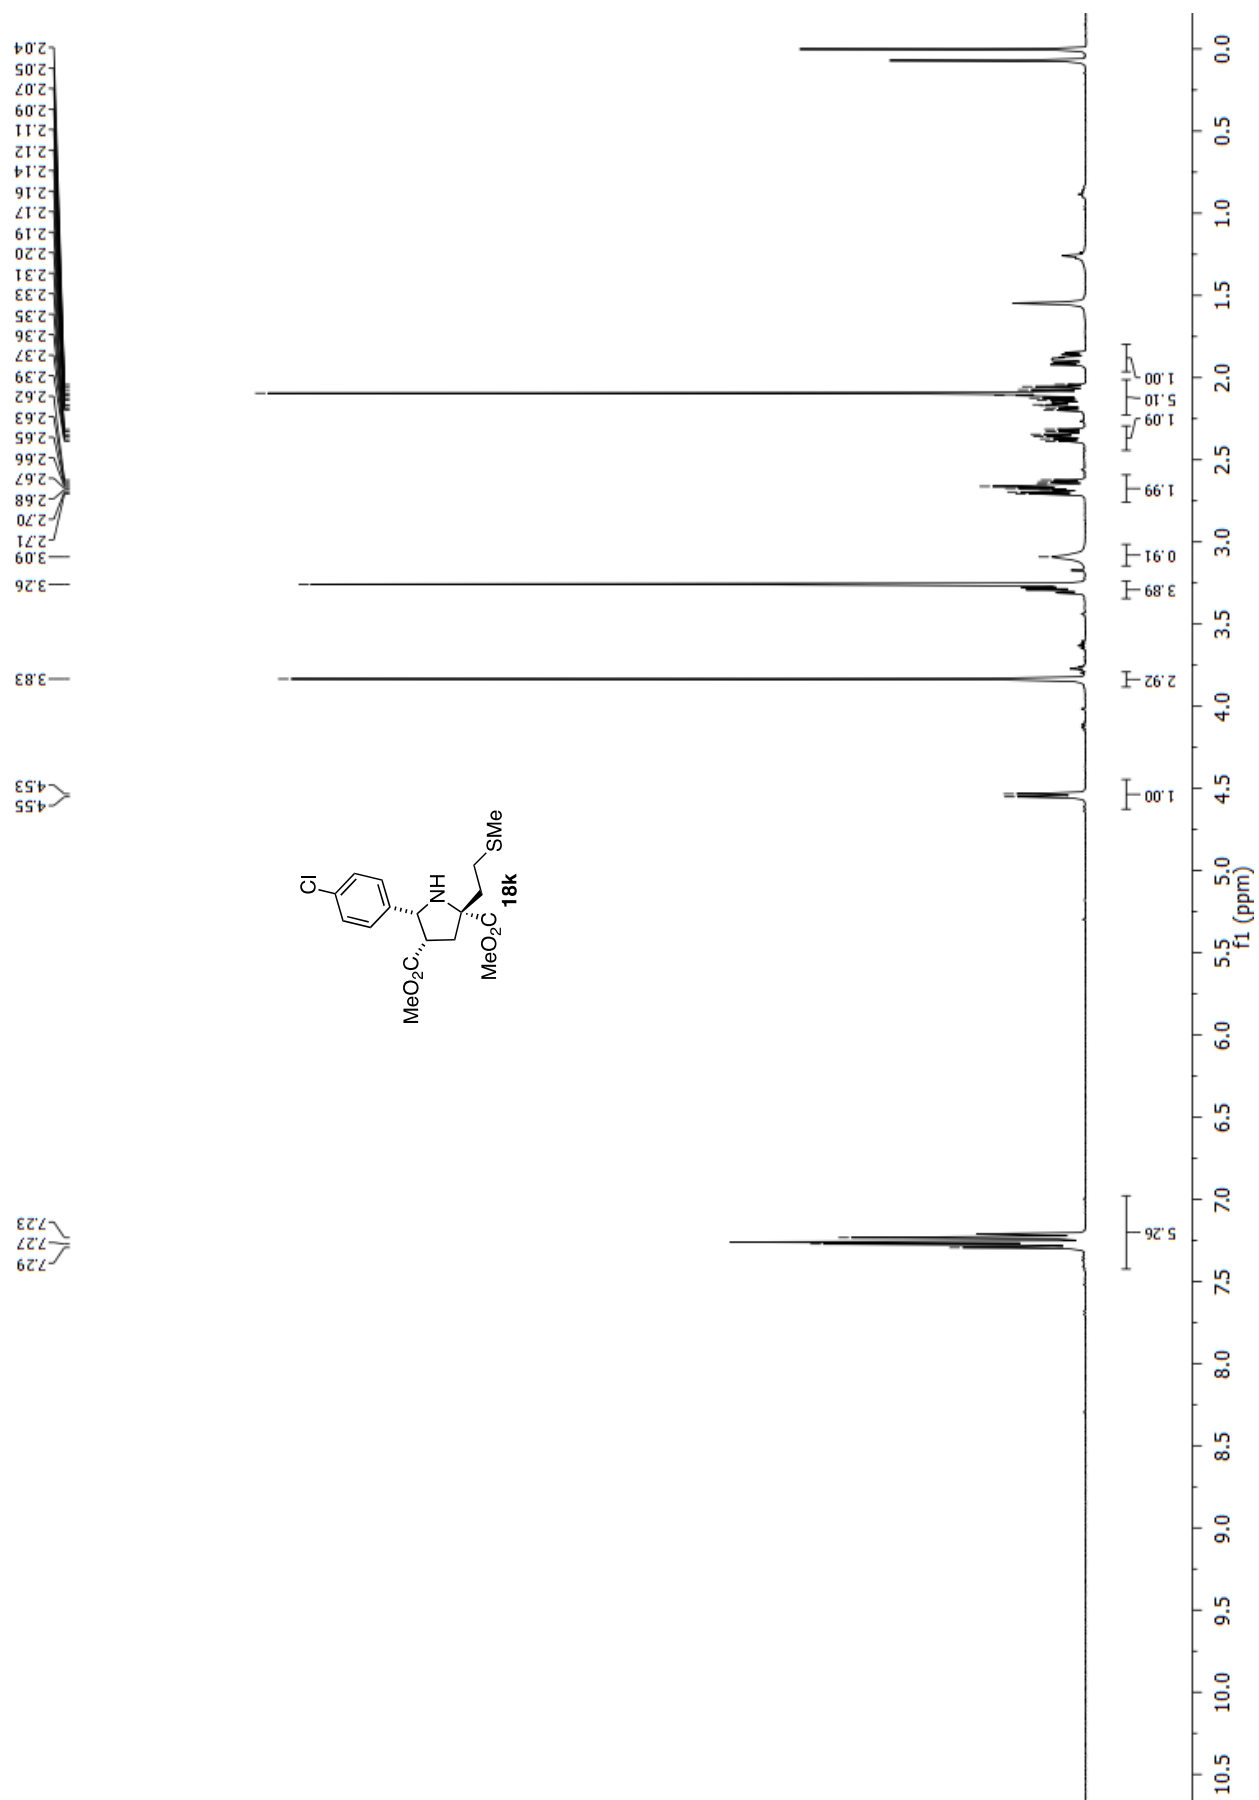

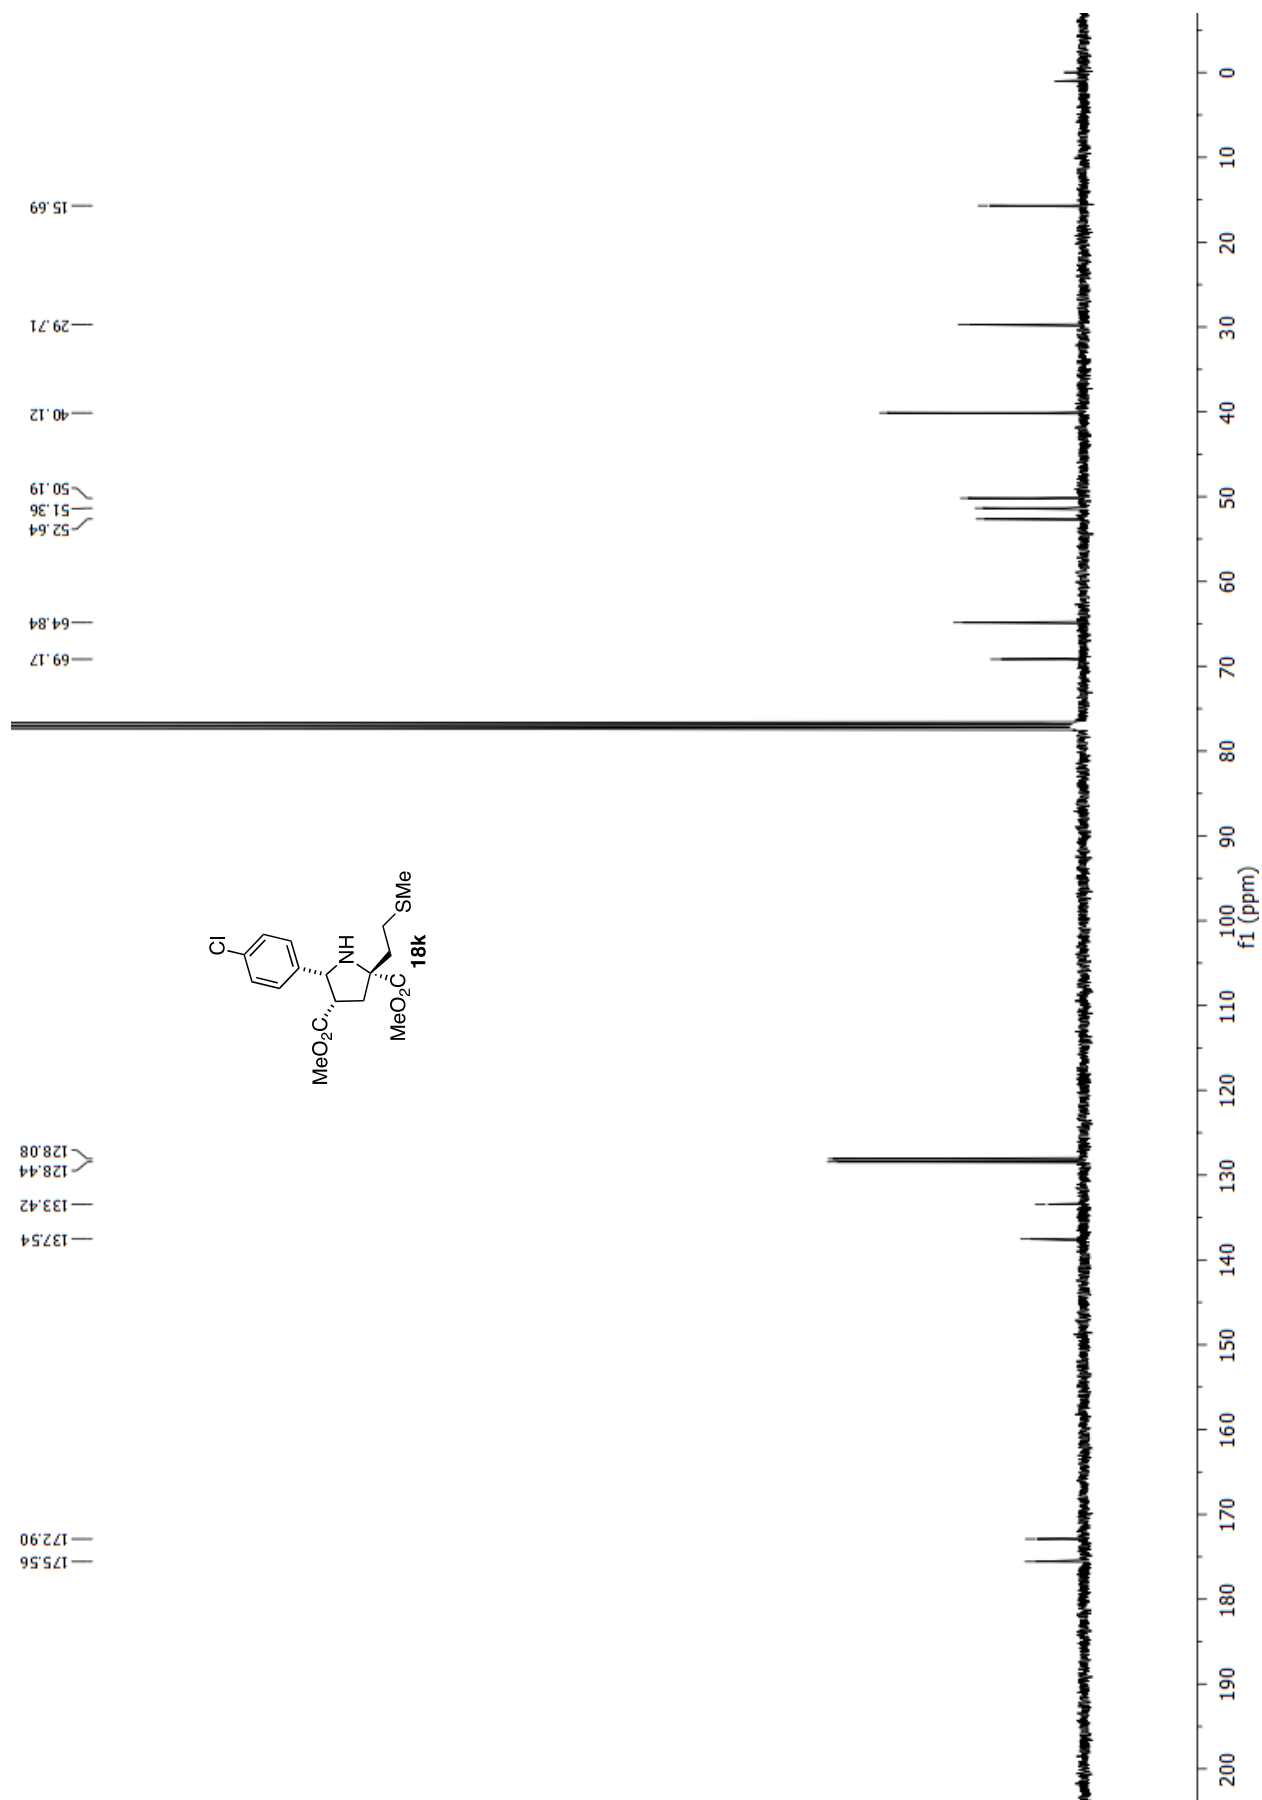

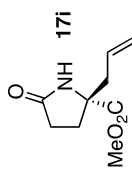

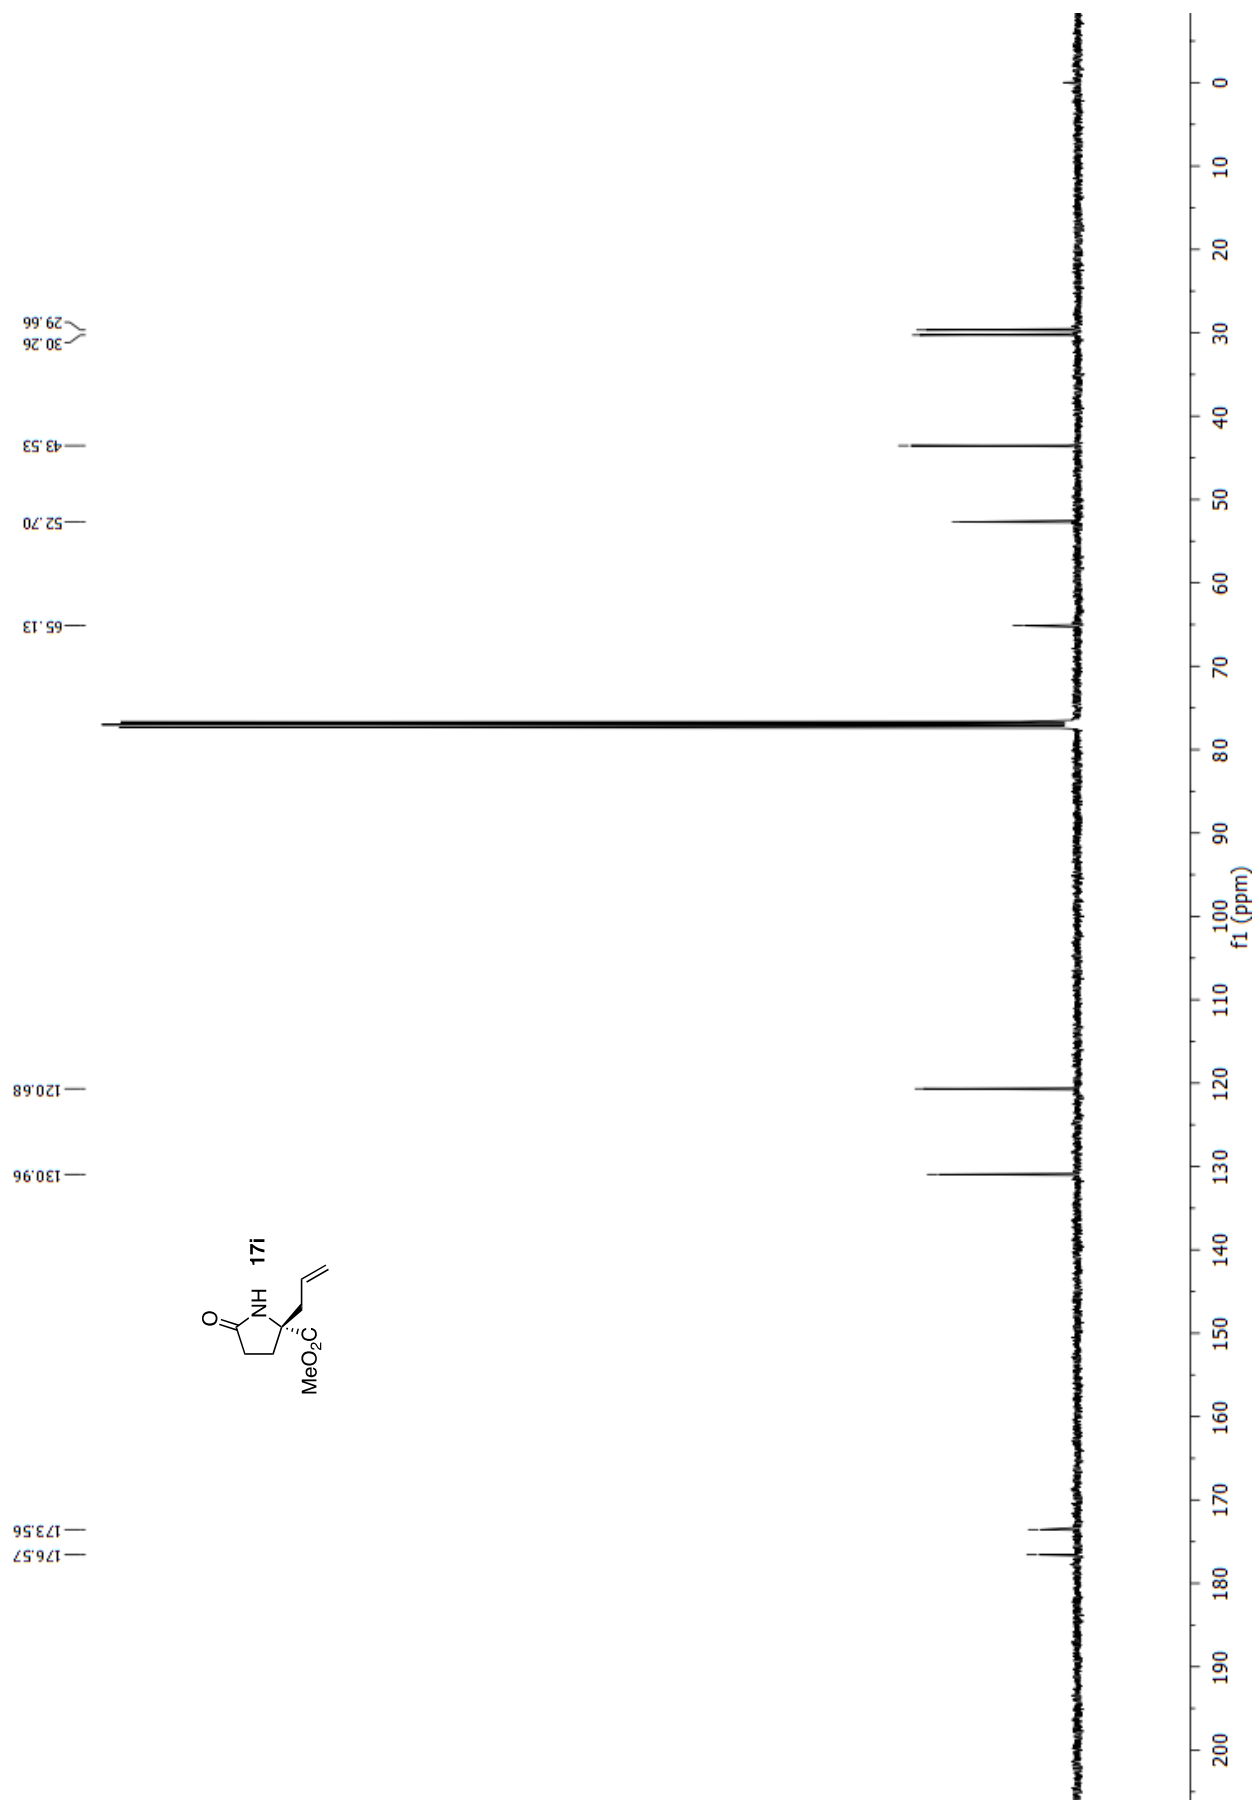



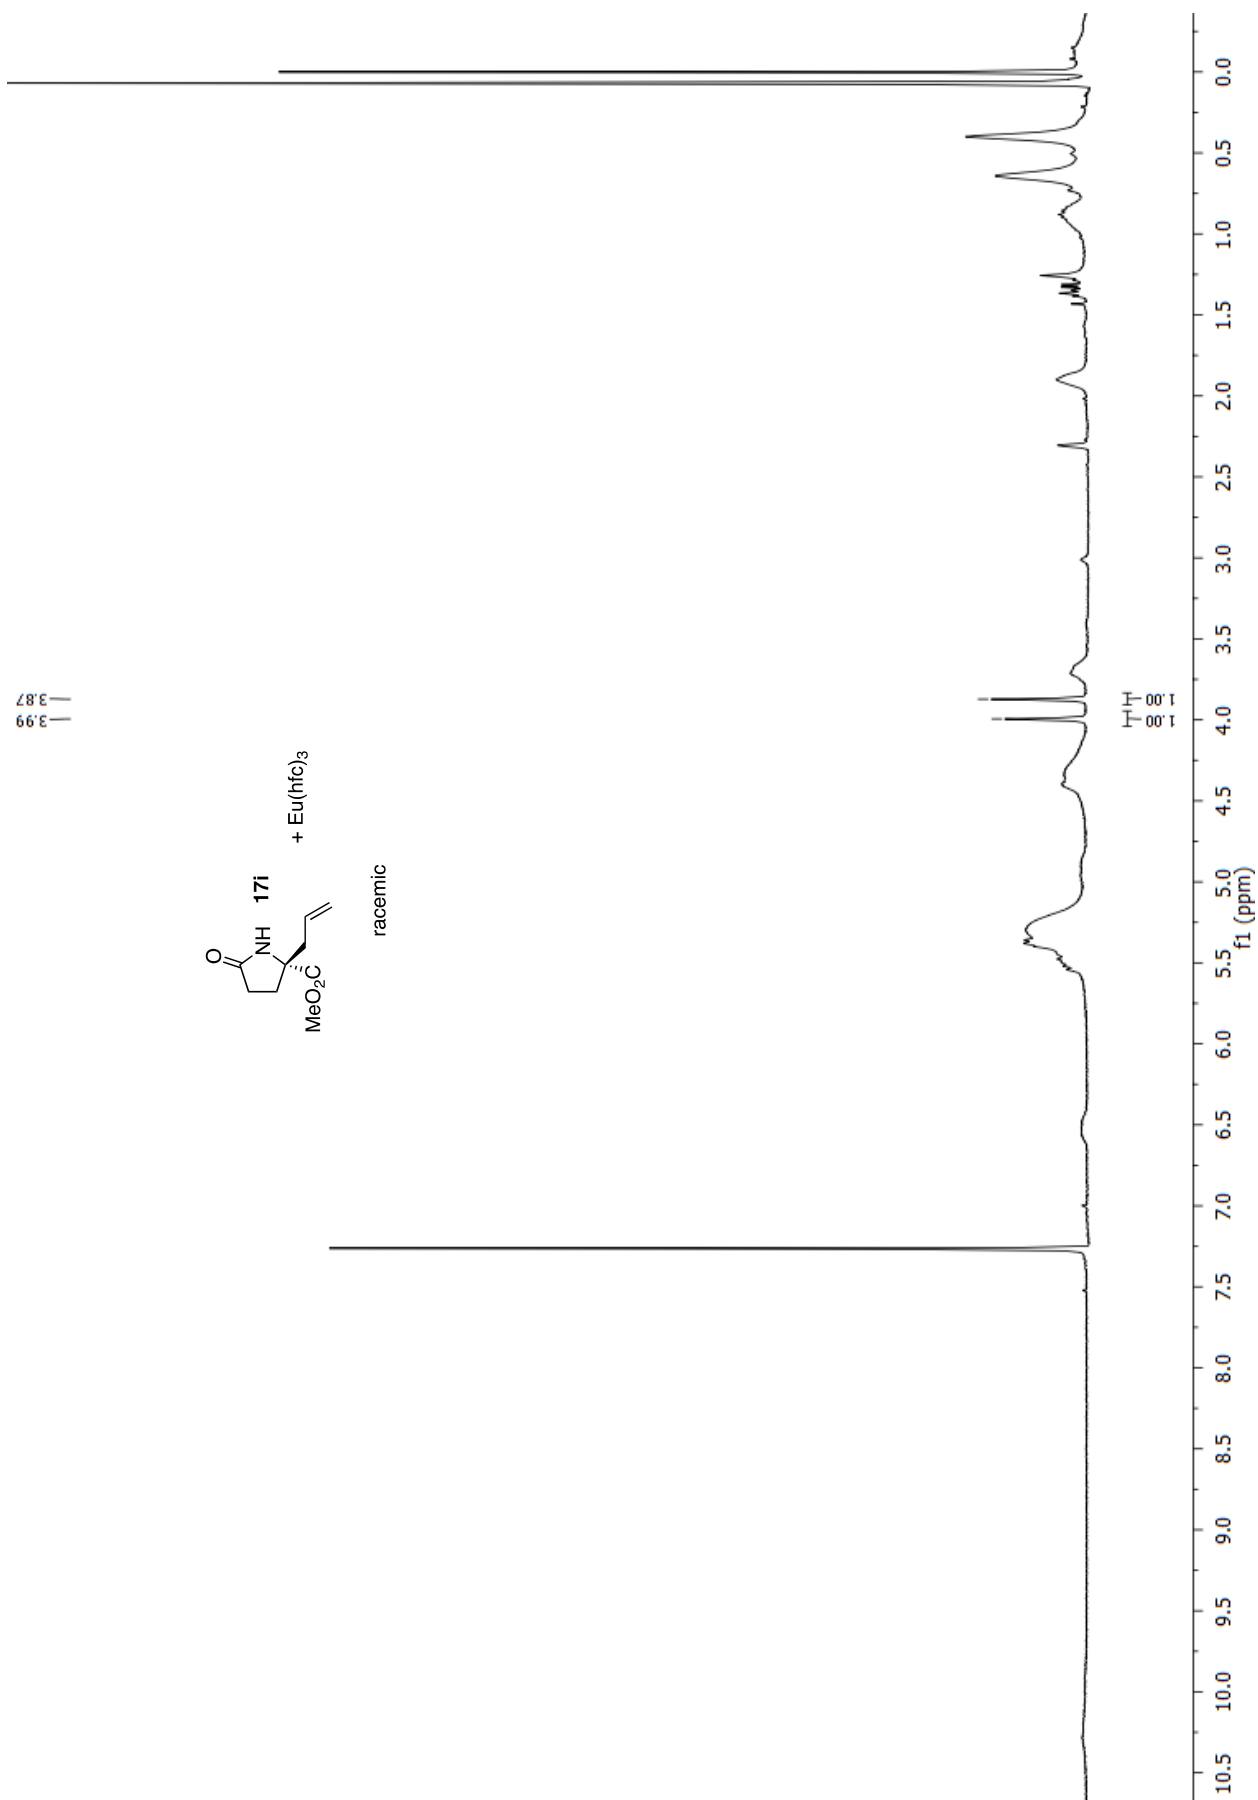

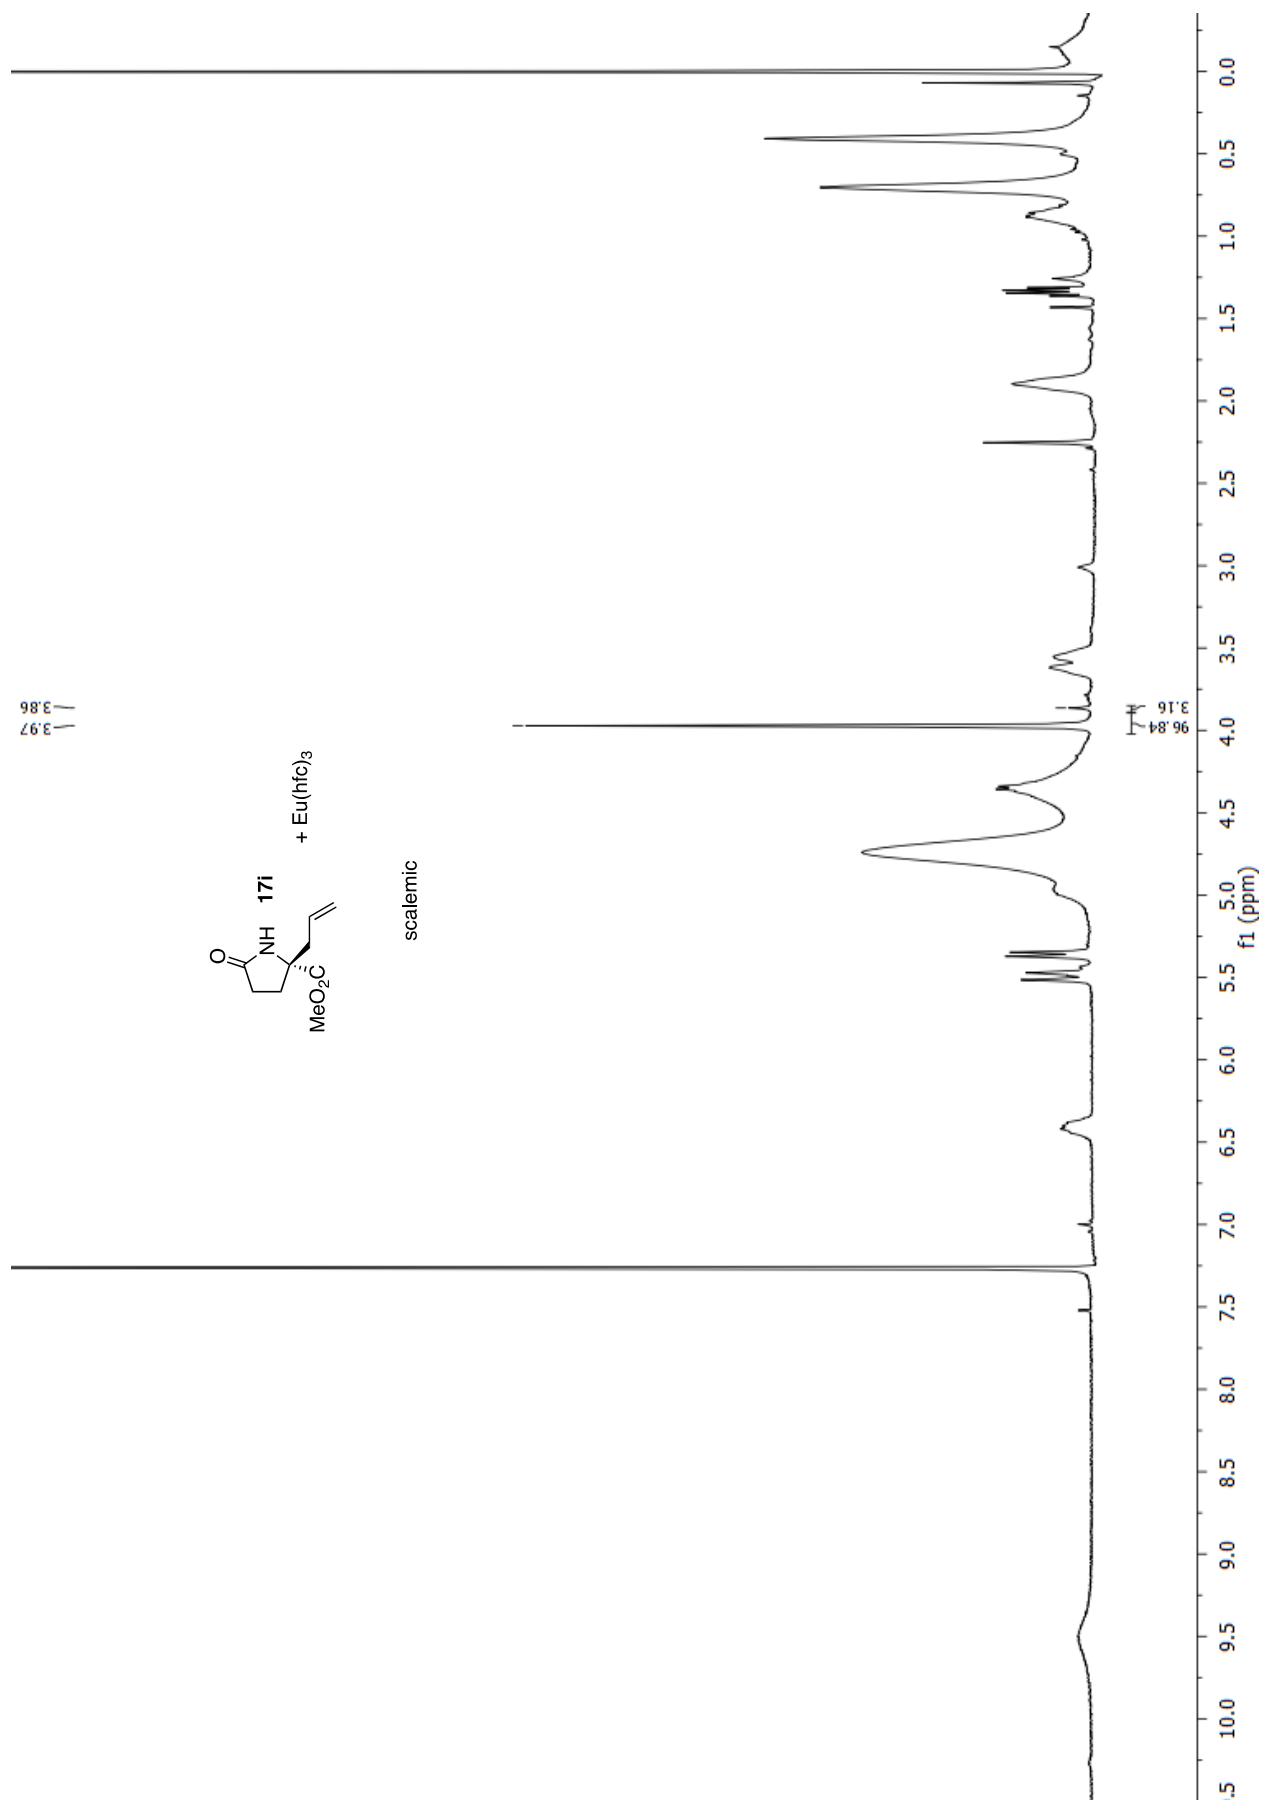

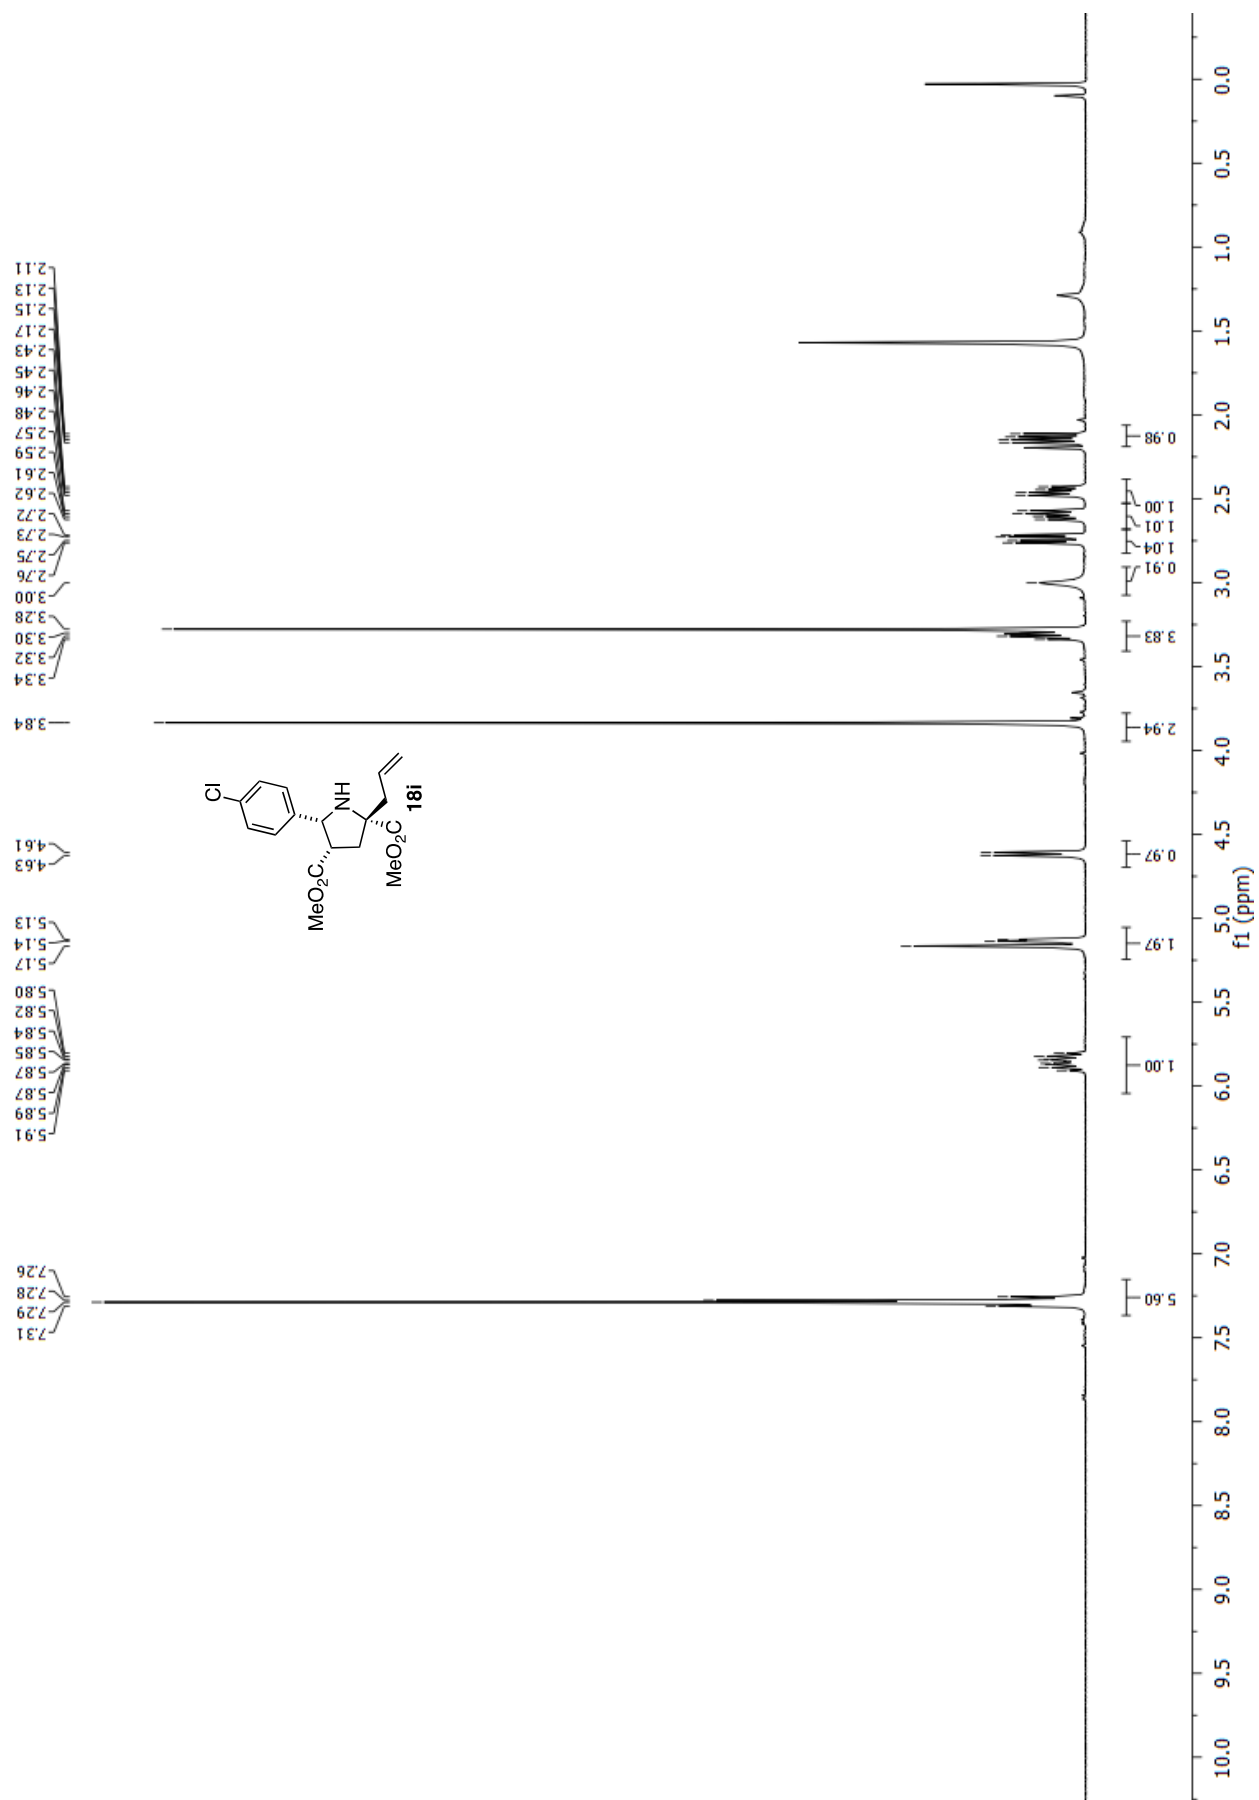

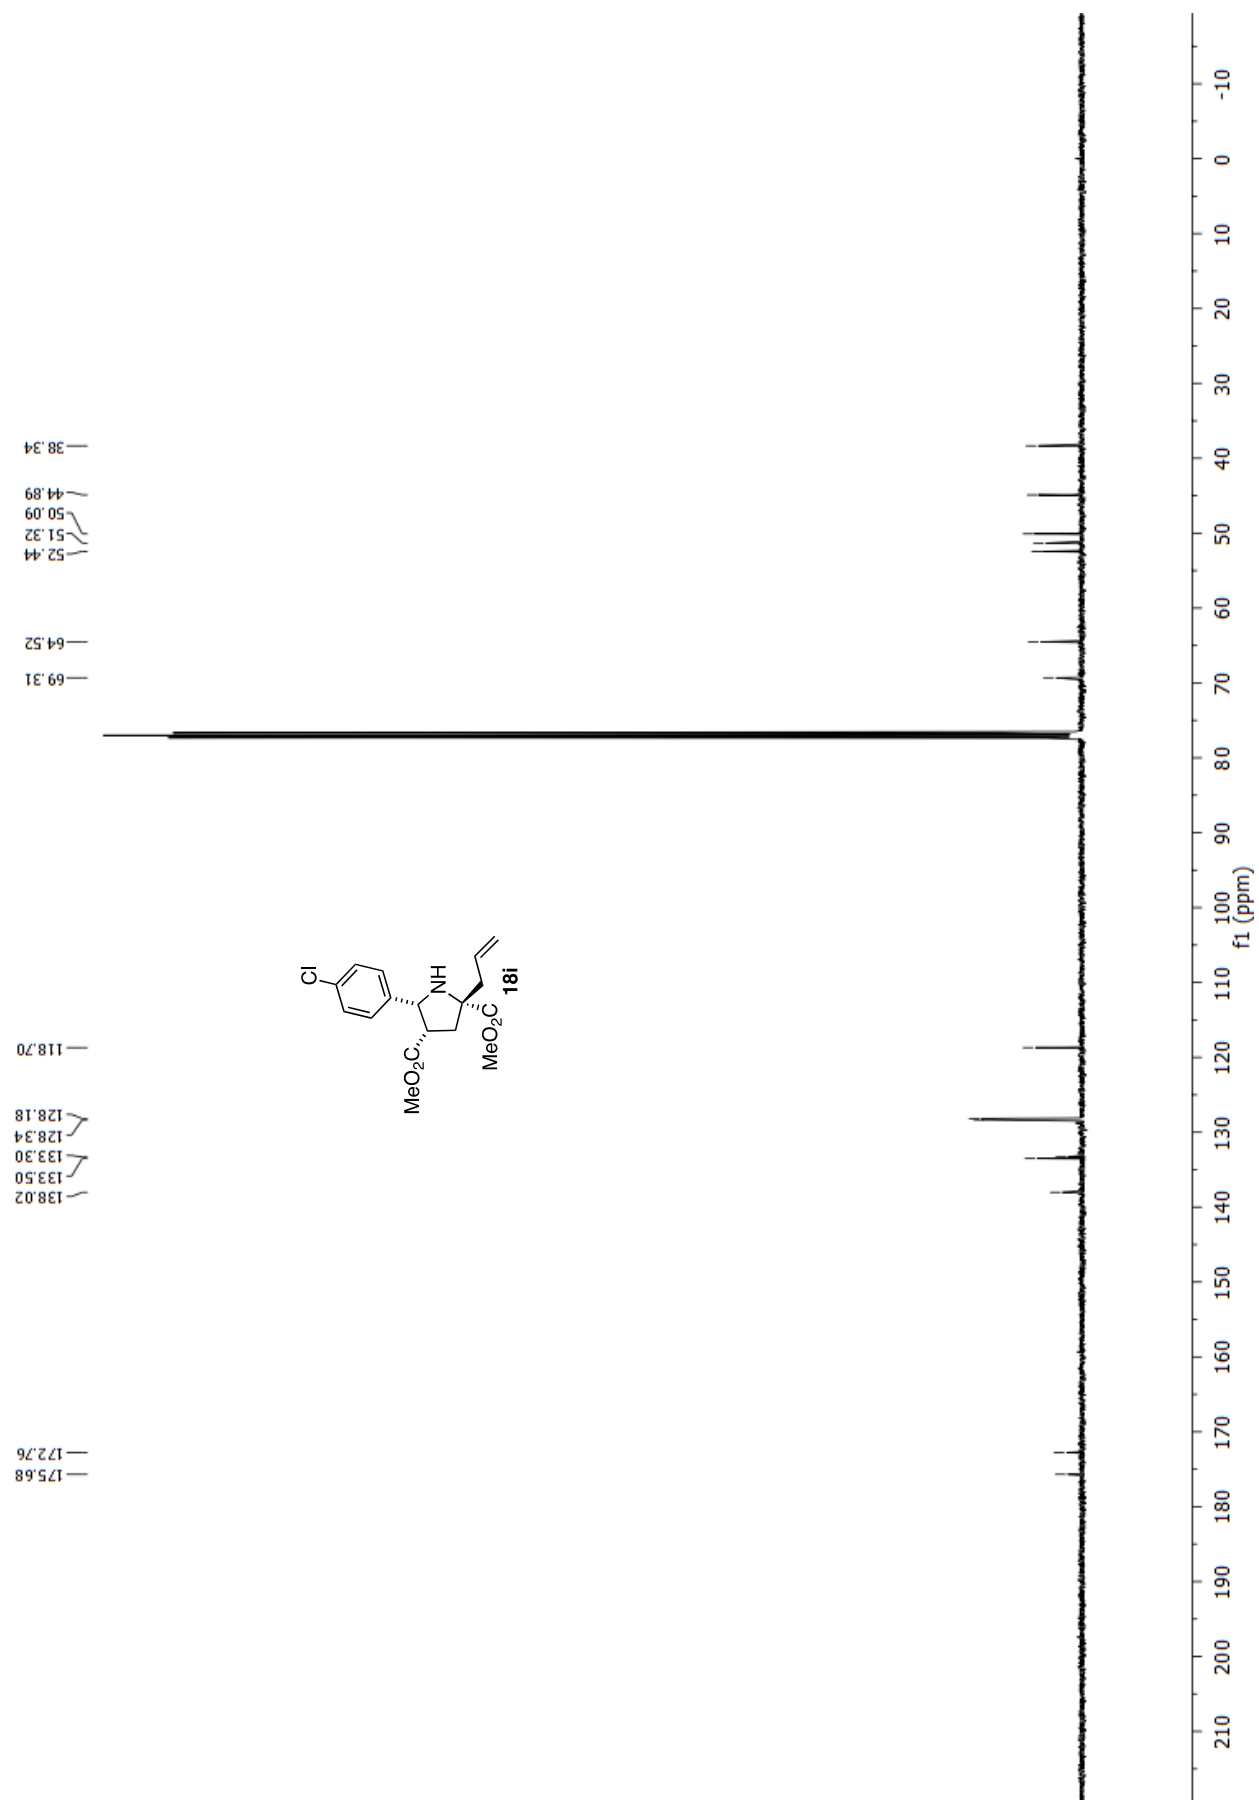

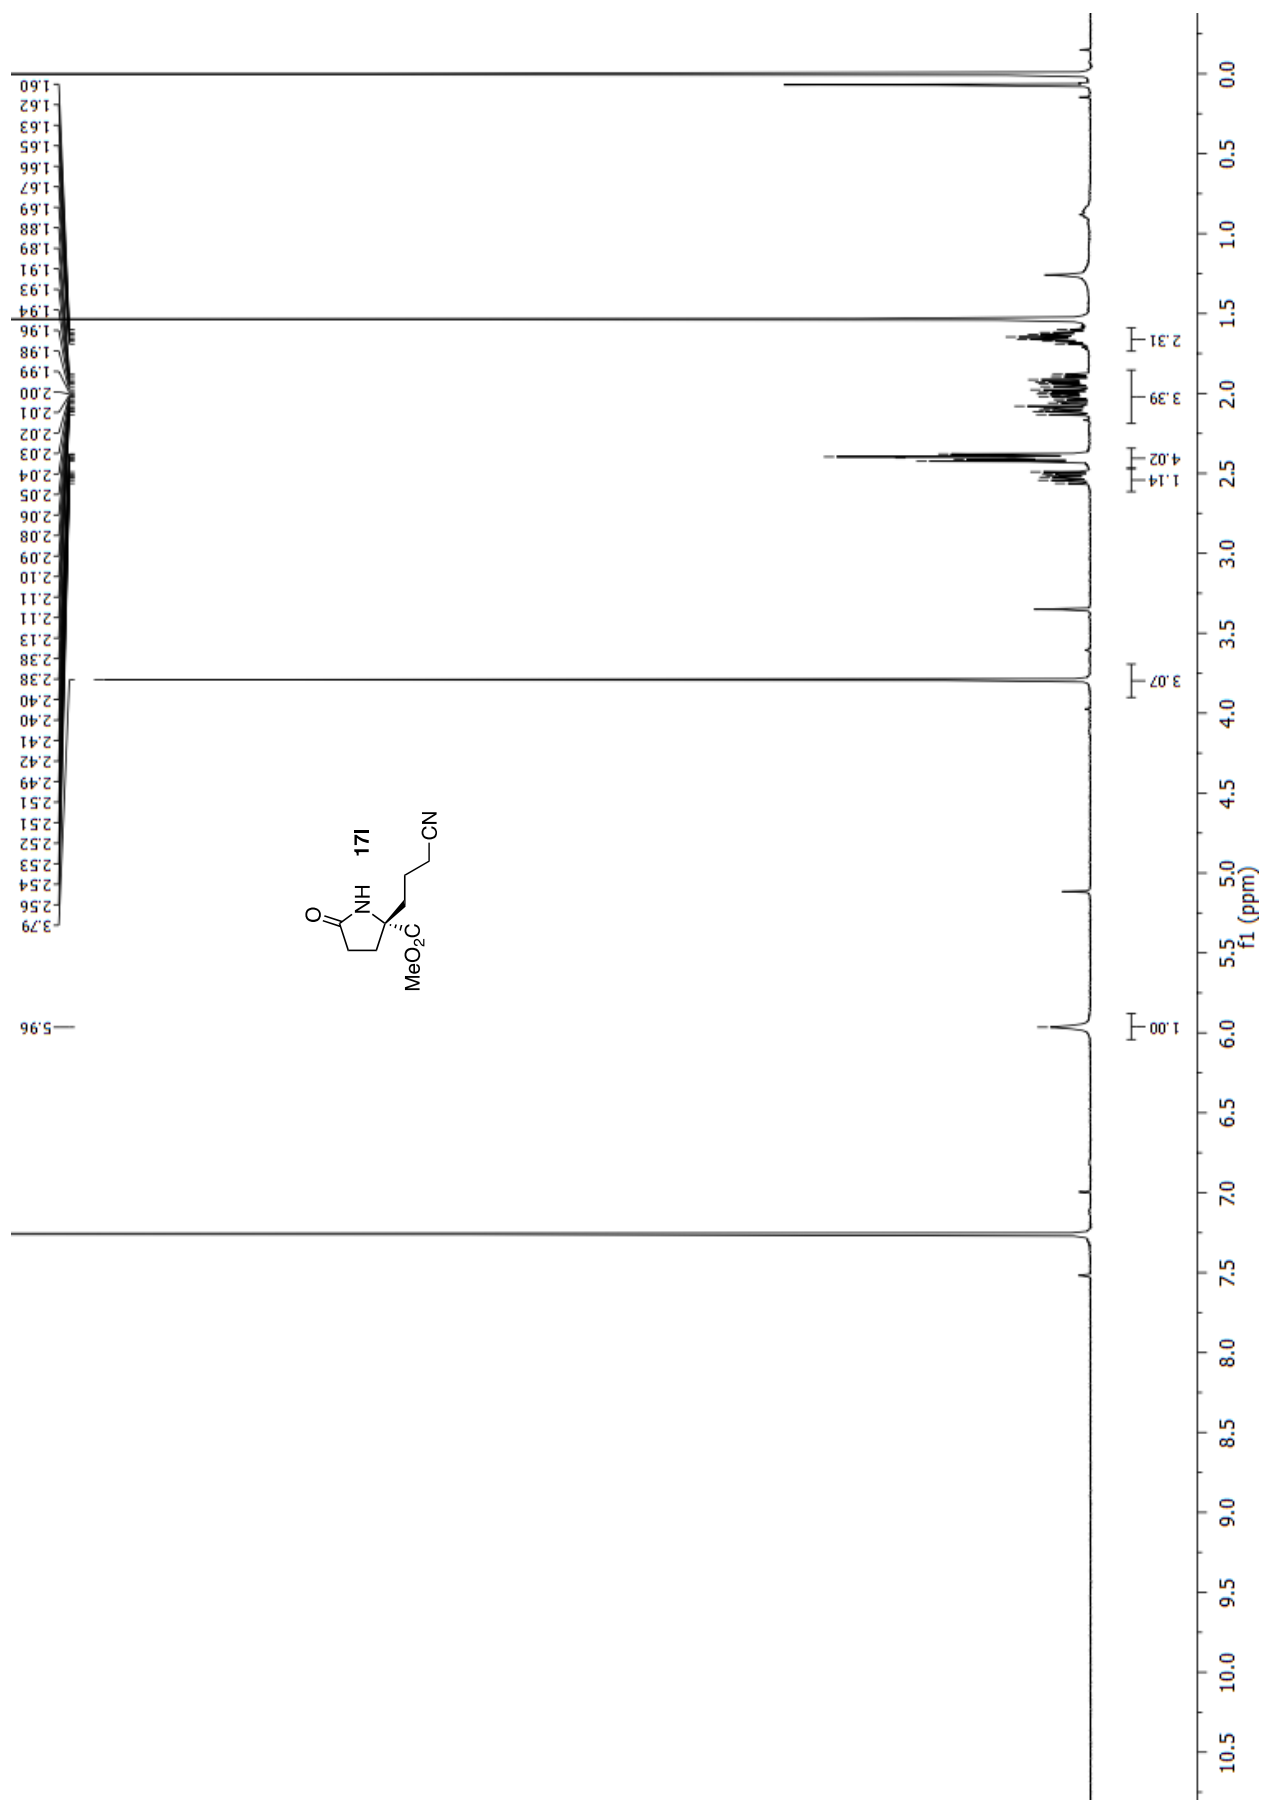

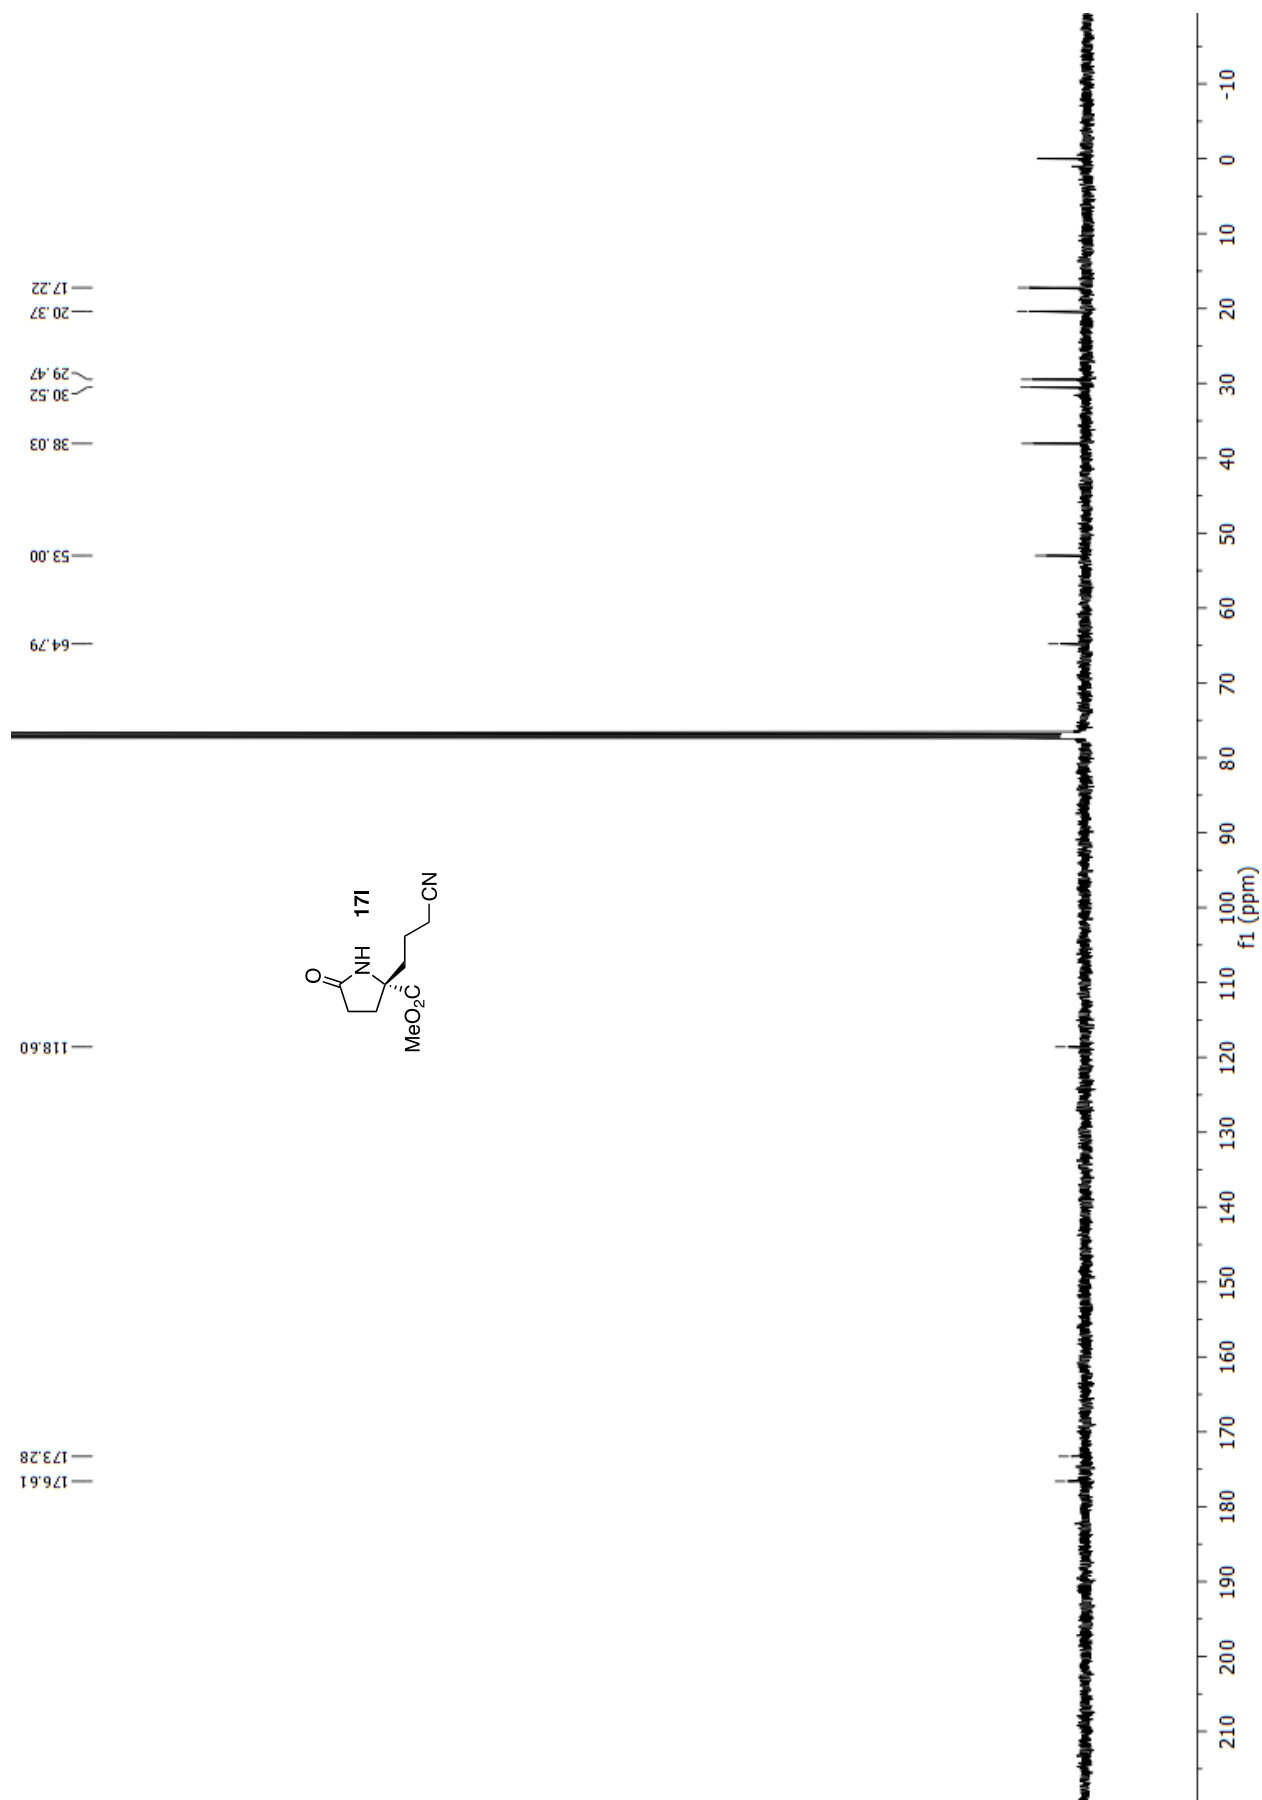

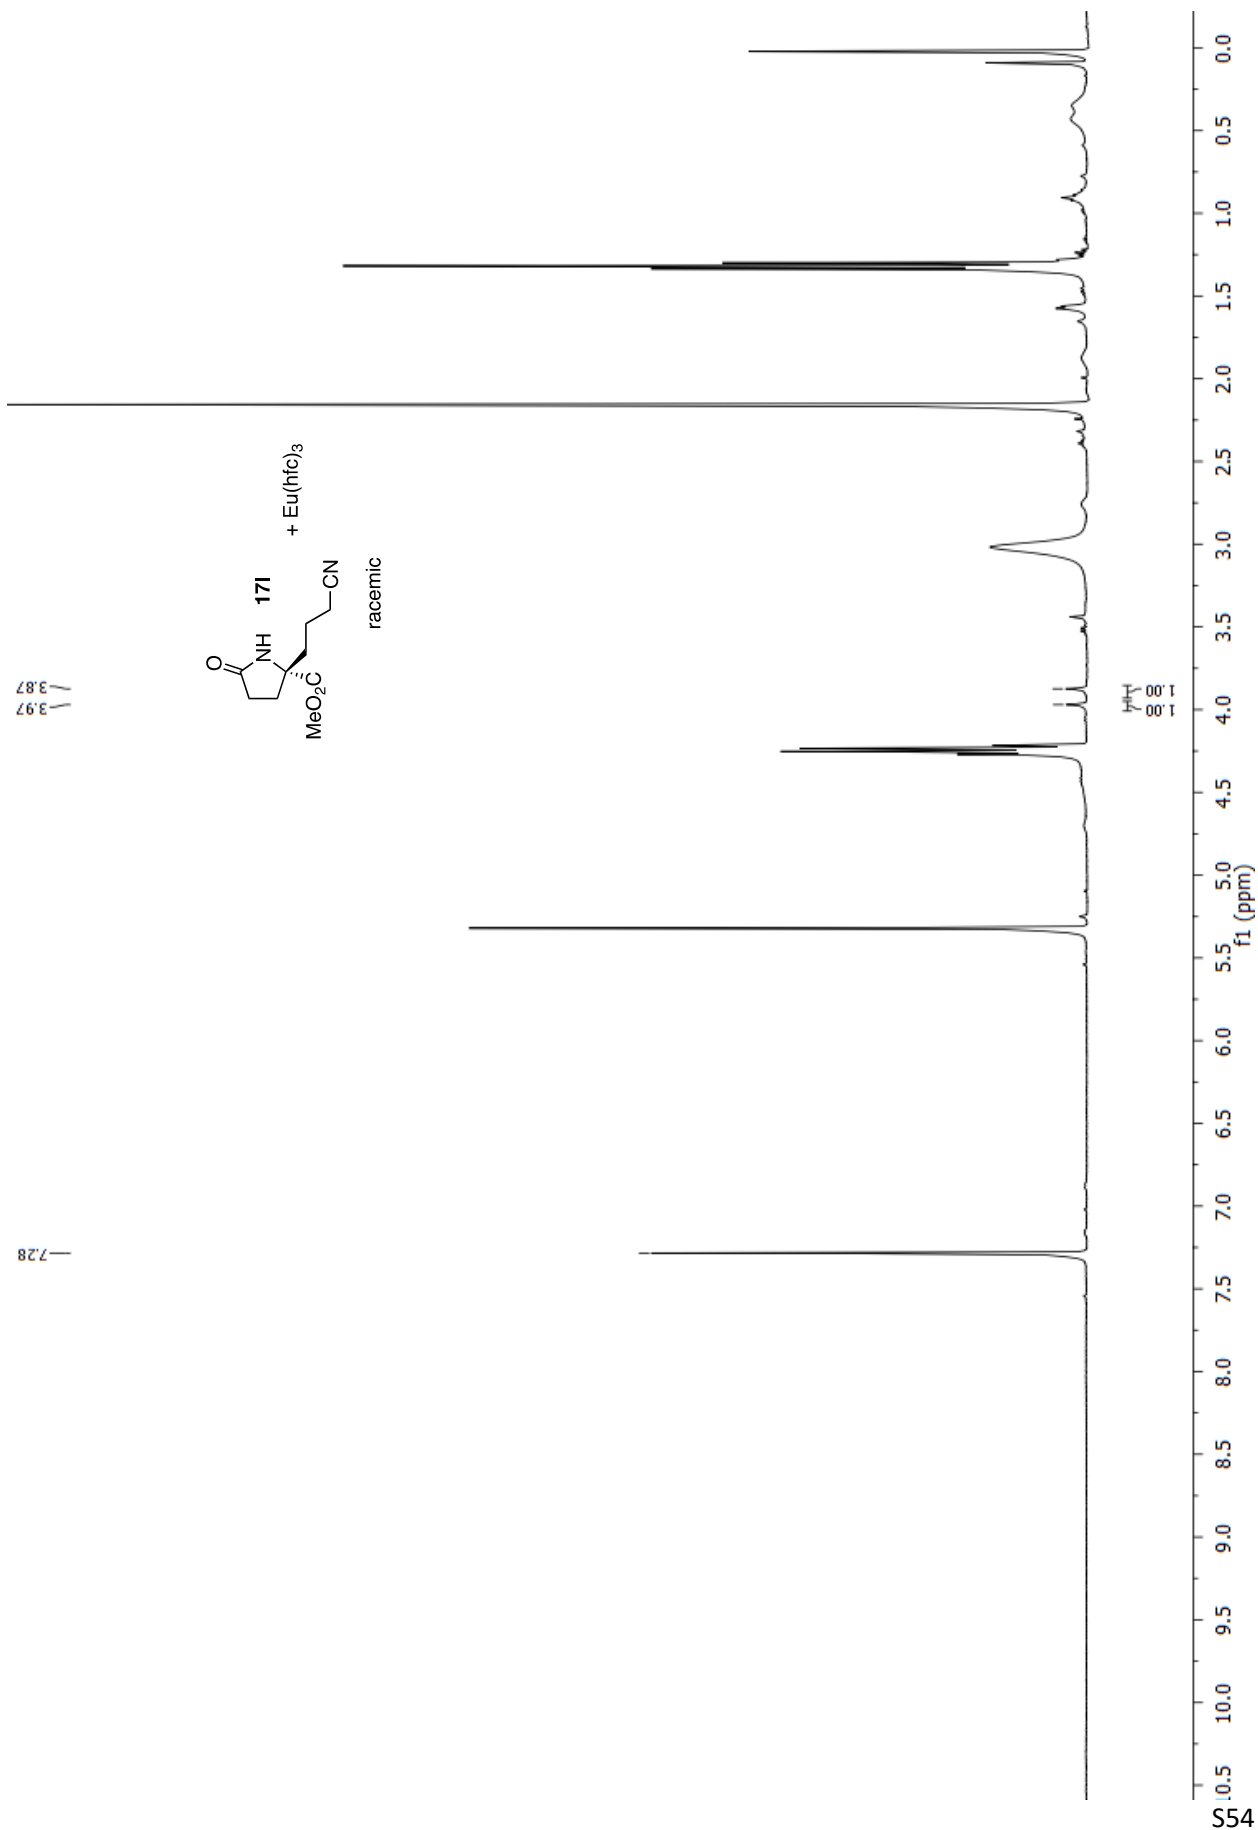

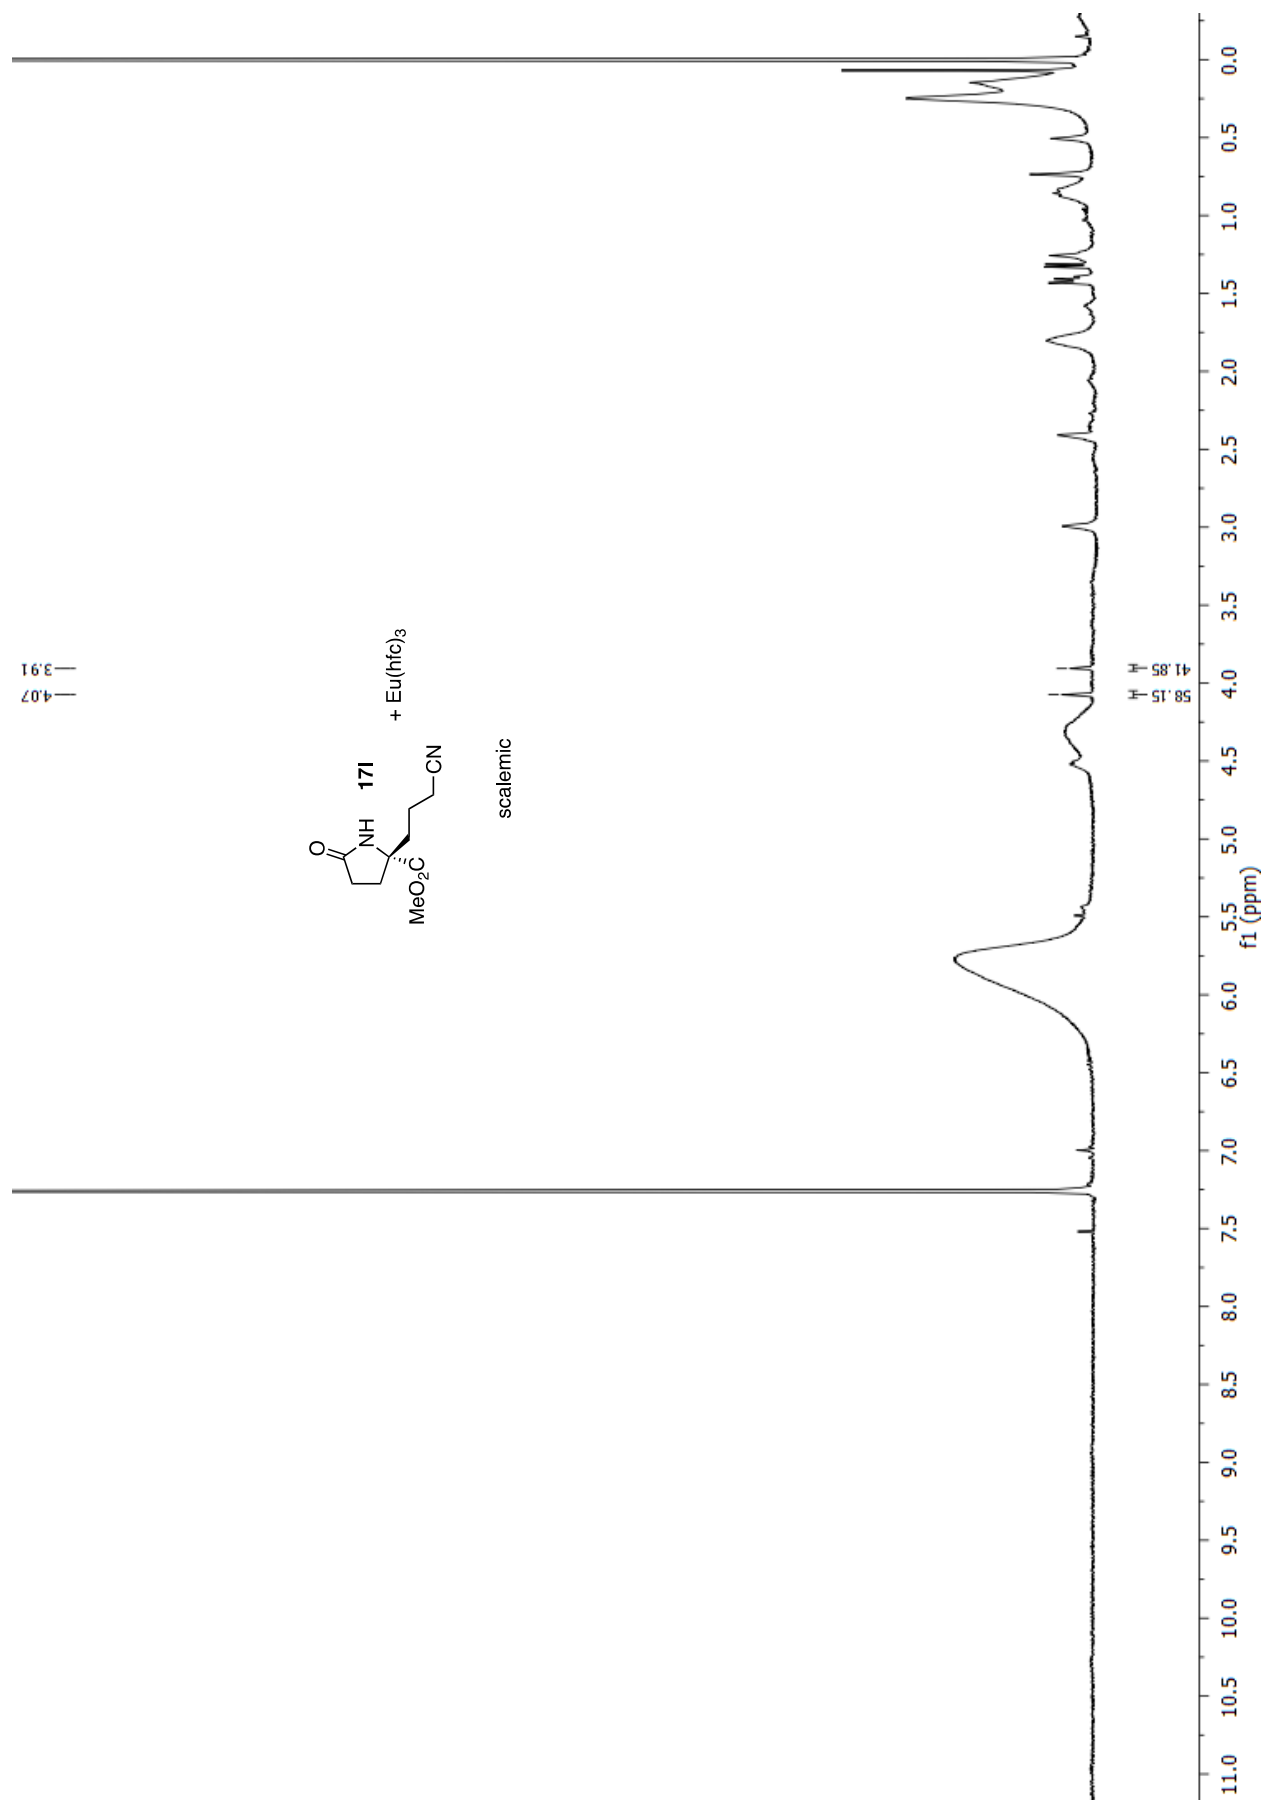



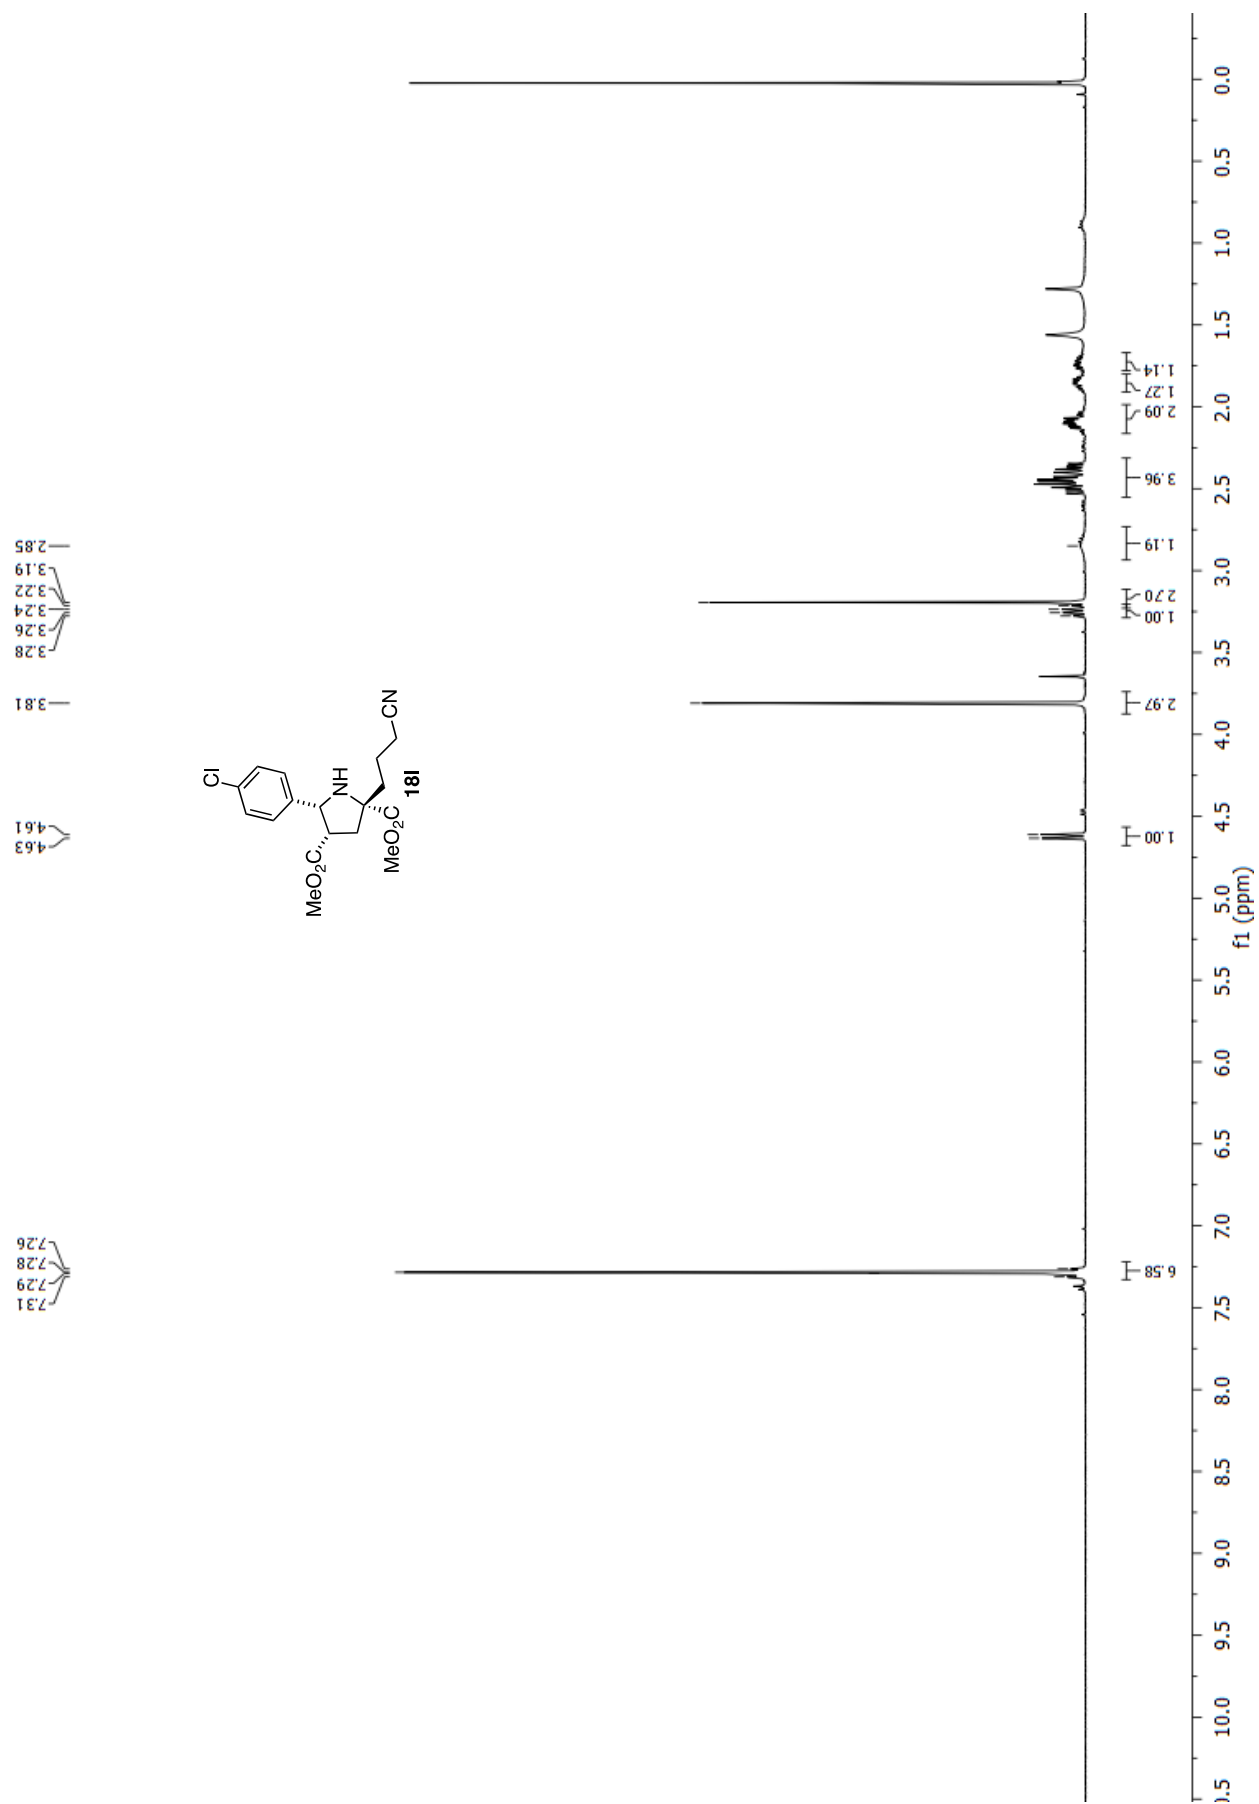

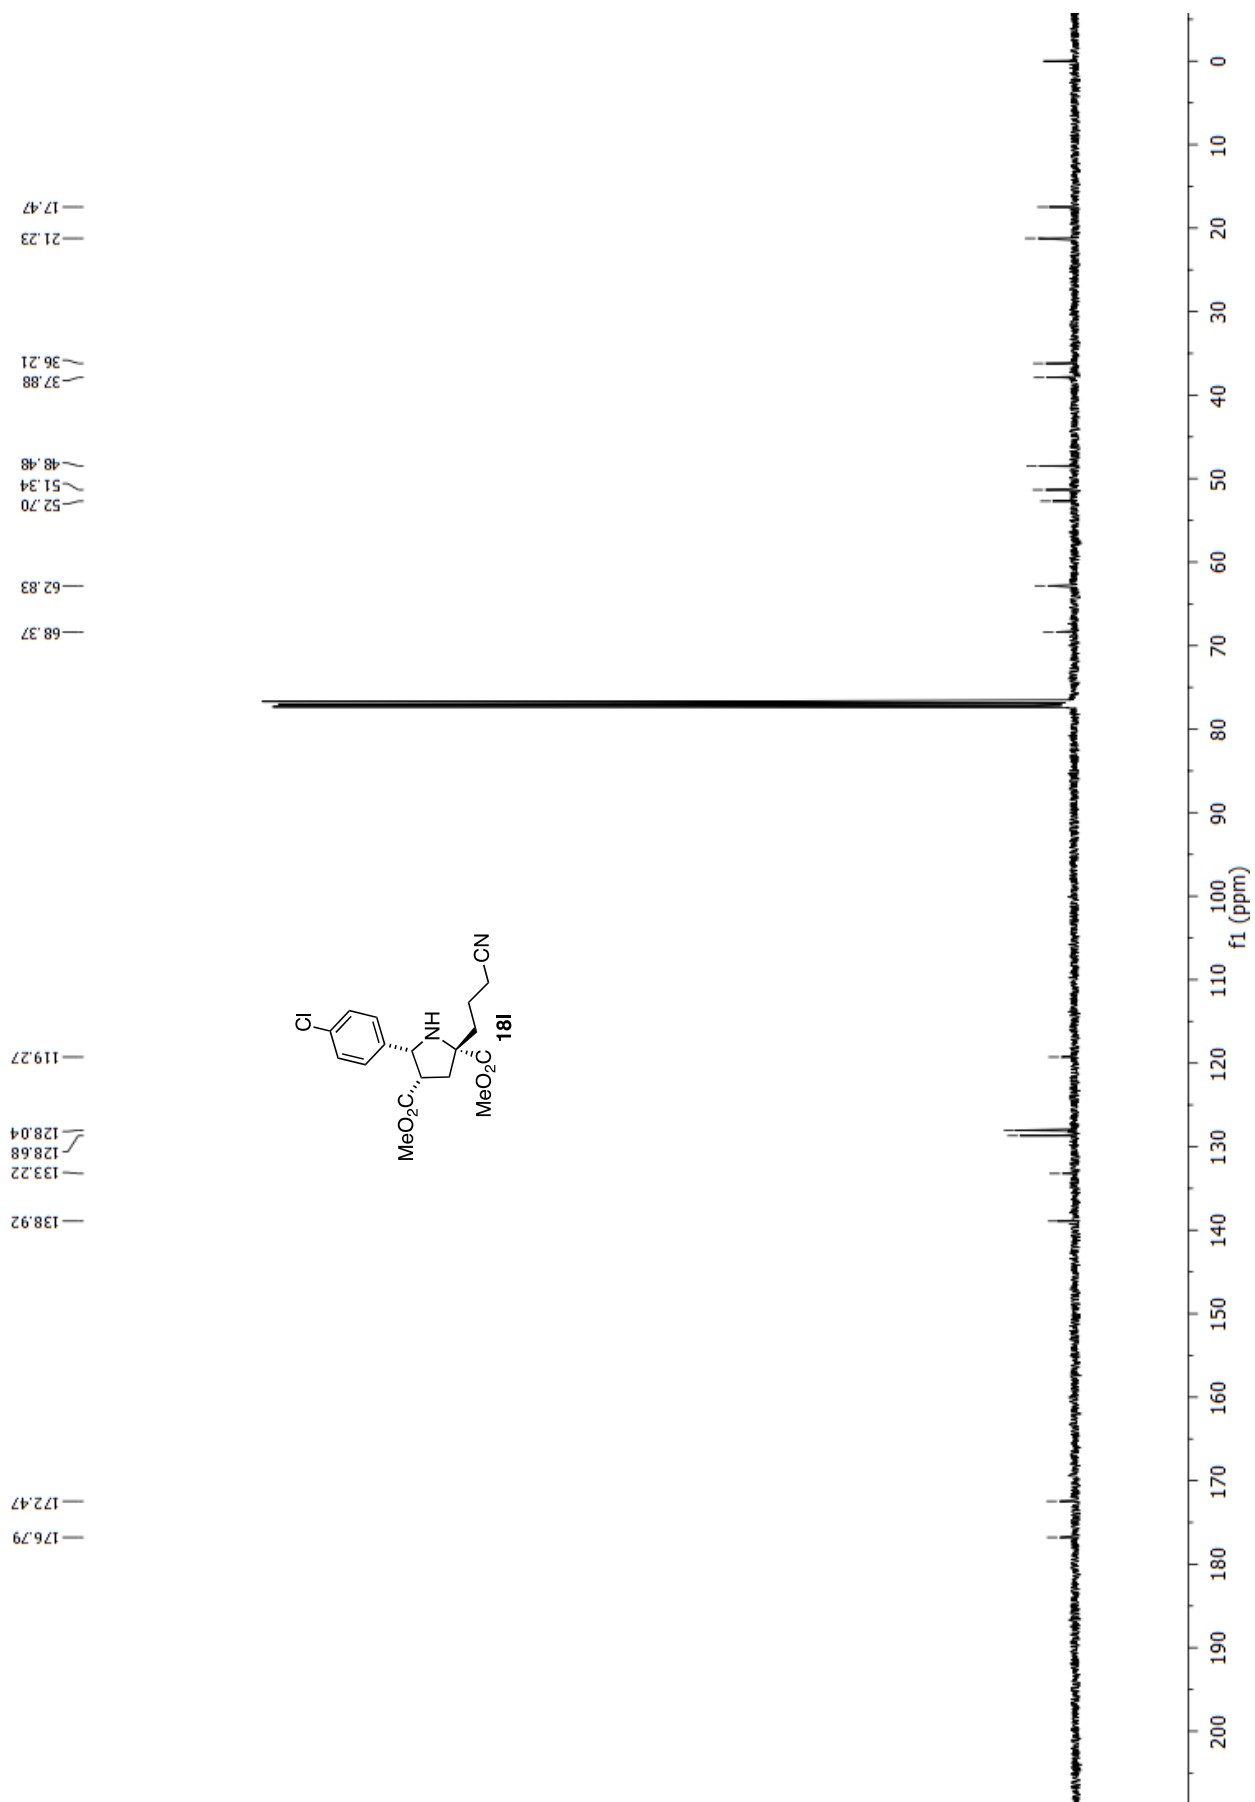

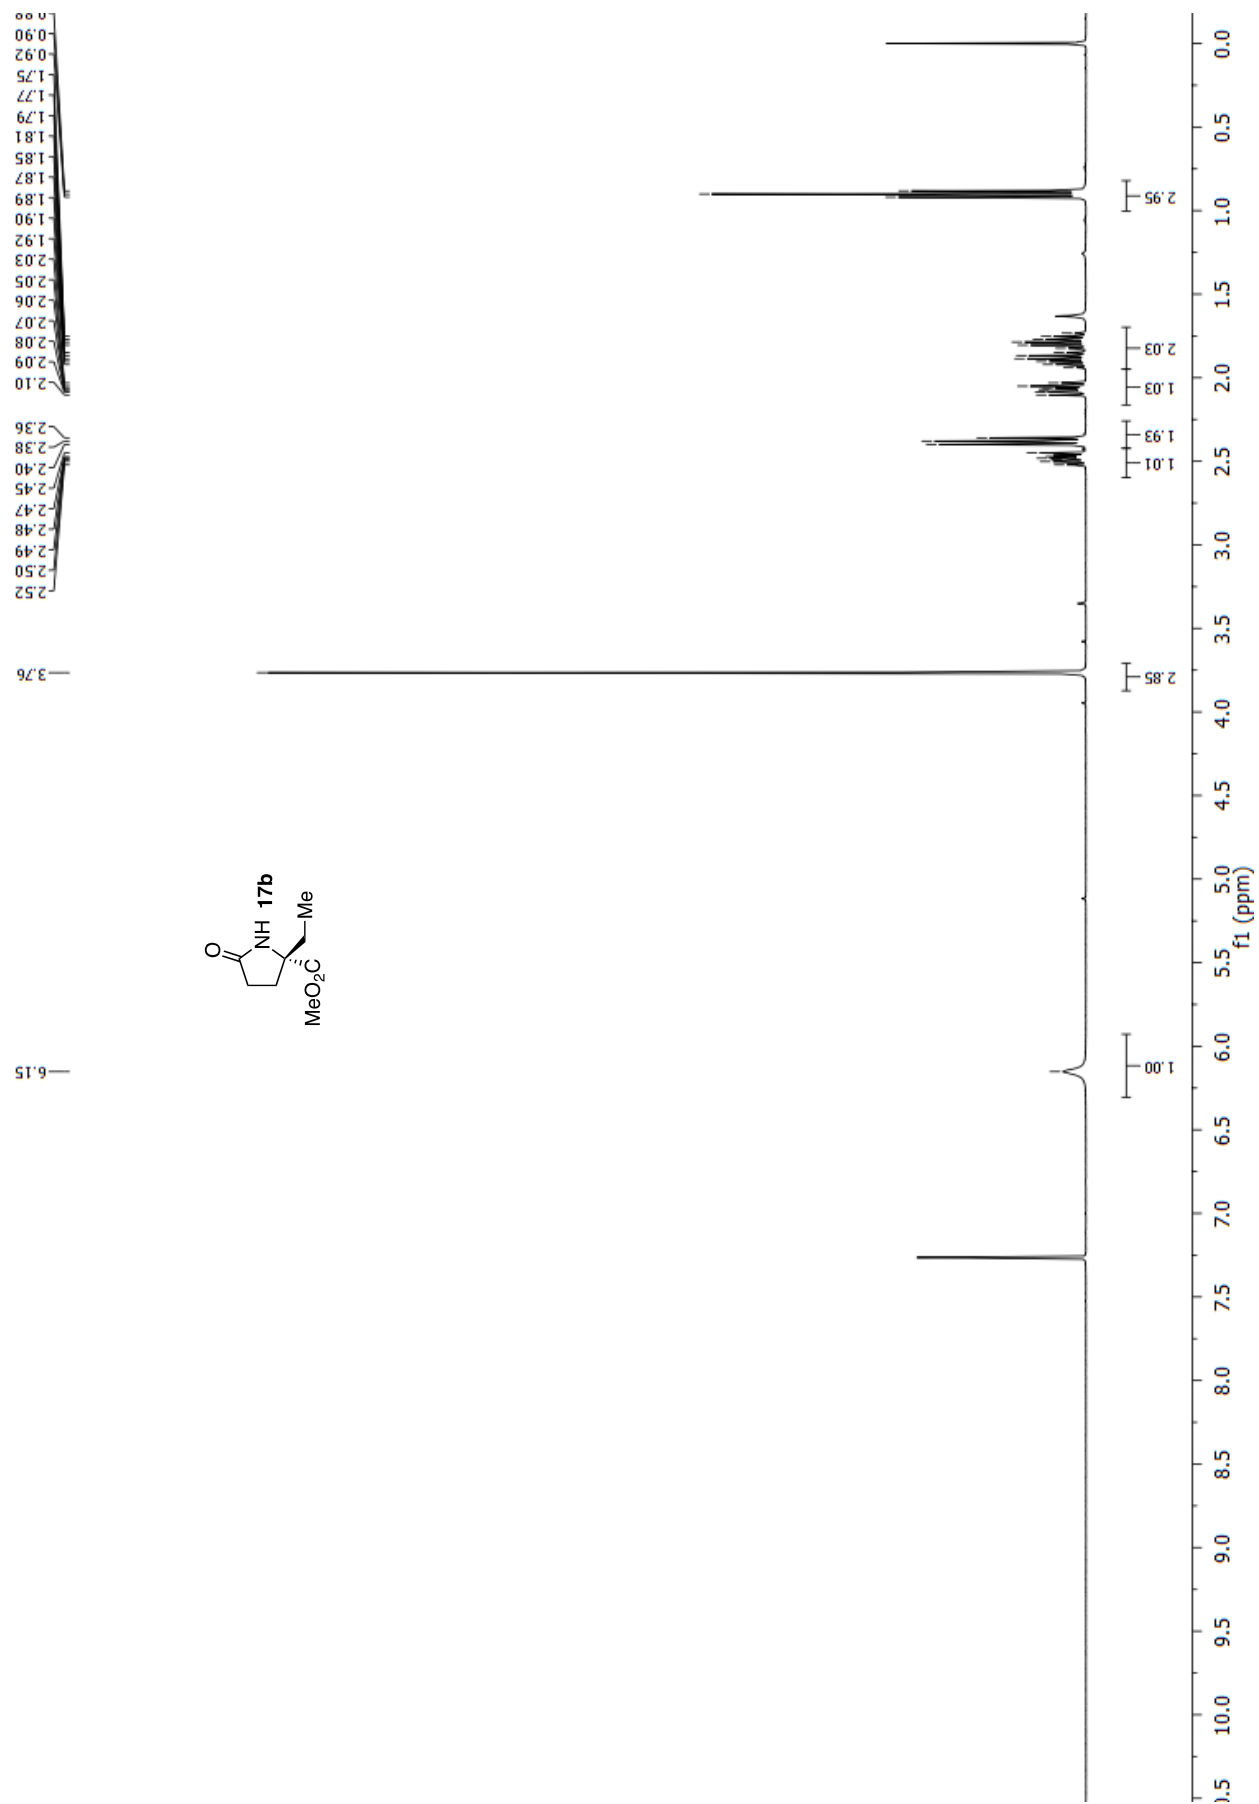

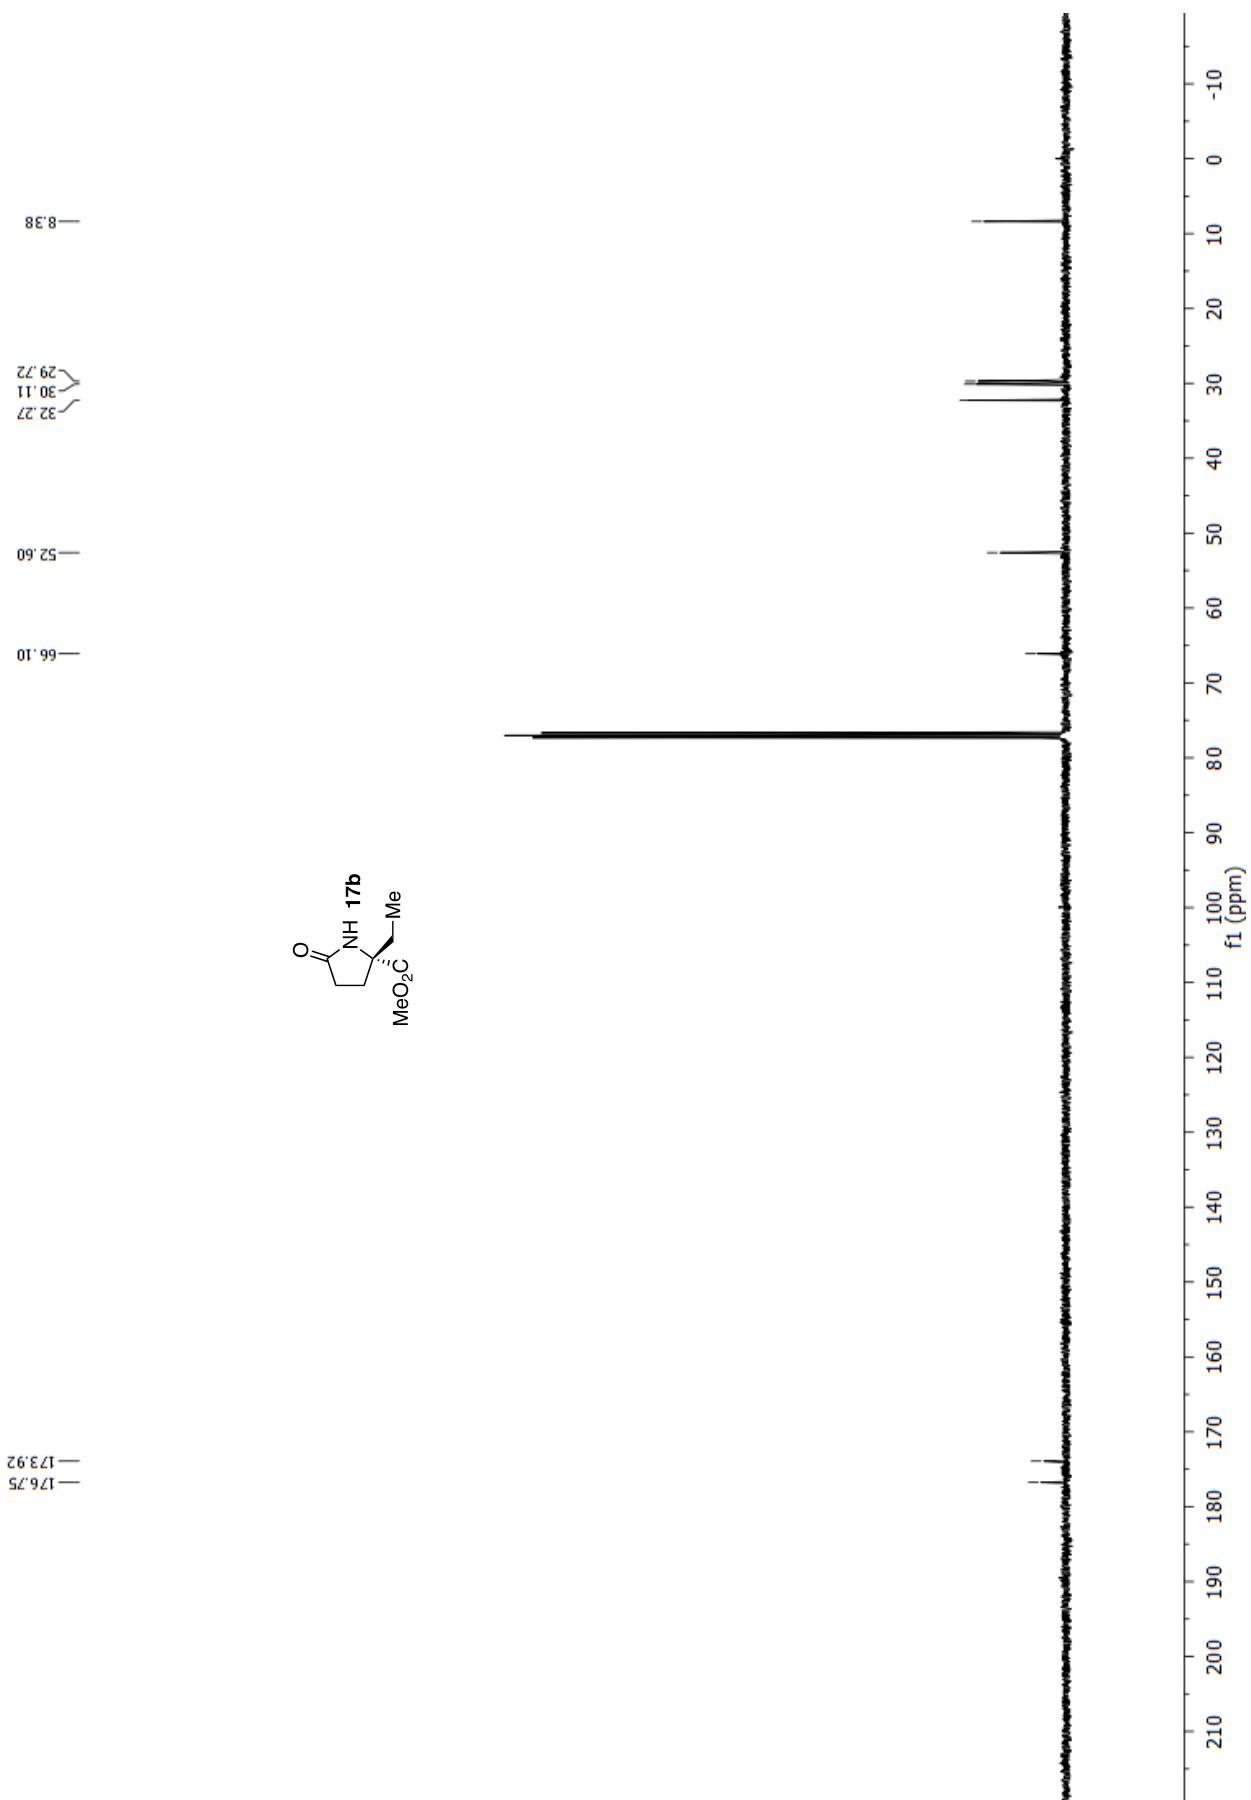

3.86  
3.81

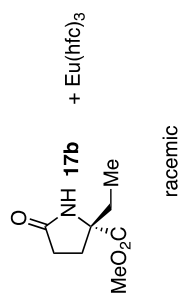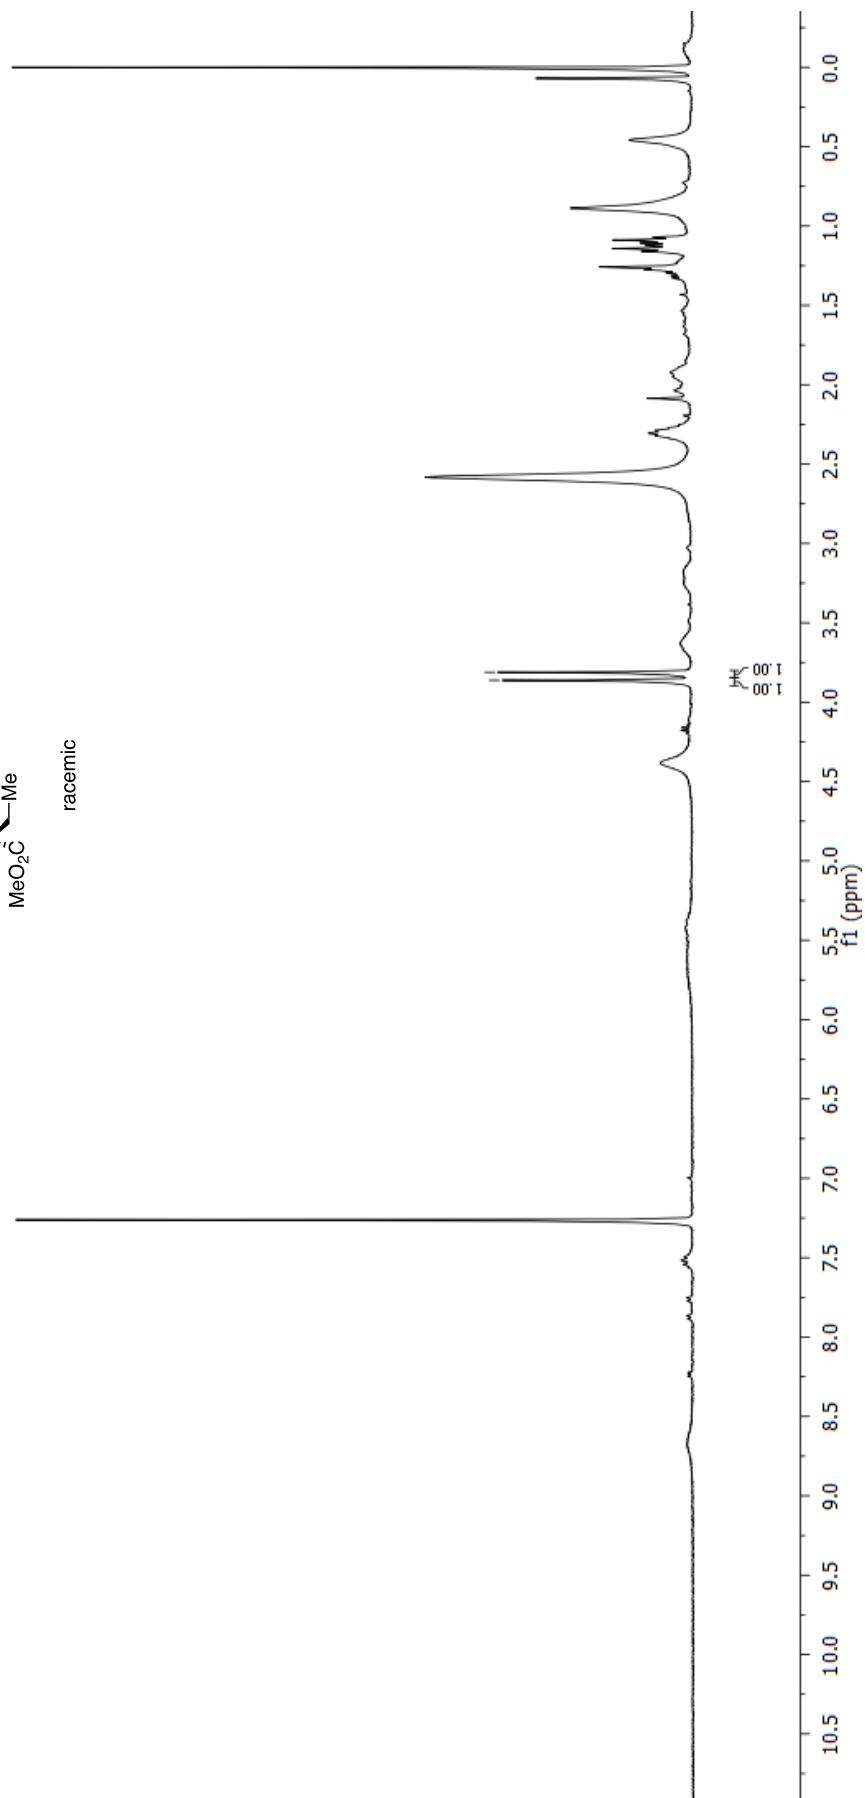

3.90  
3.82

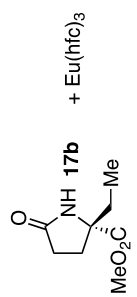

scalemic

93.67  
6.33

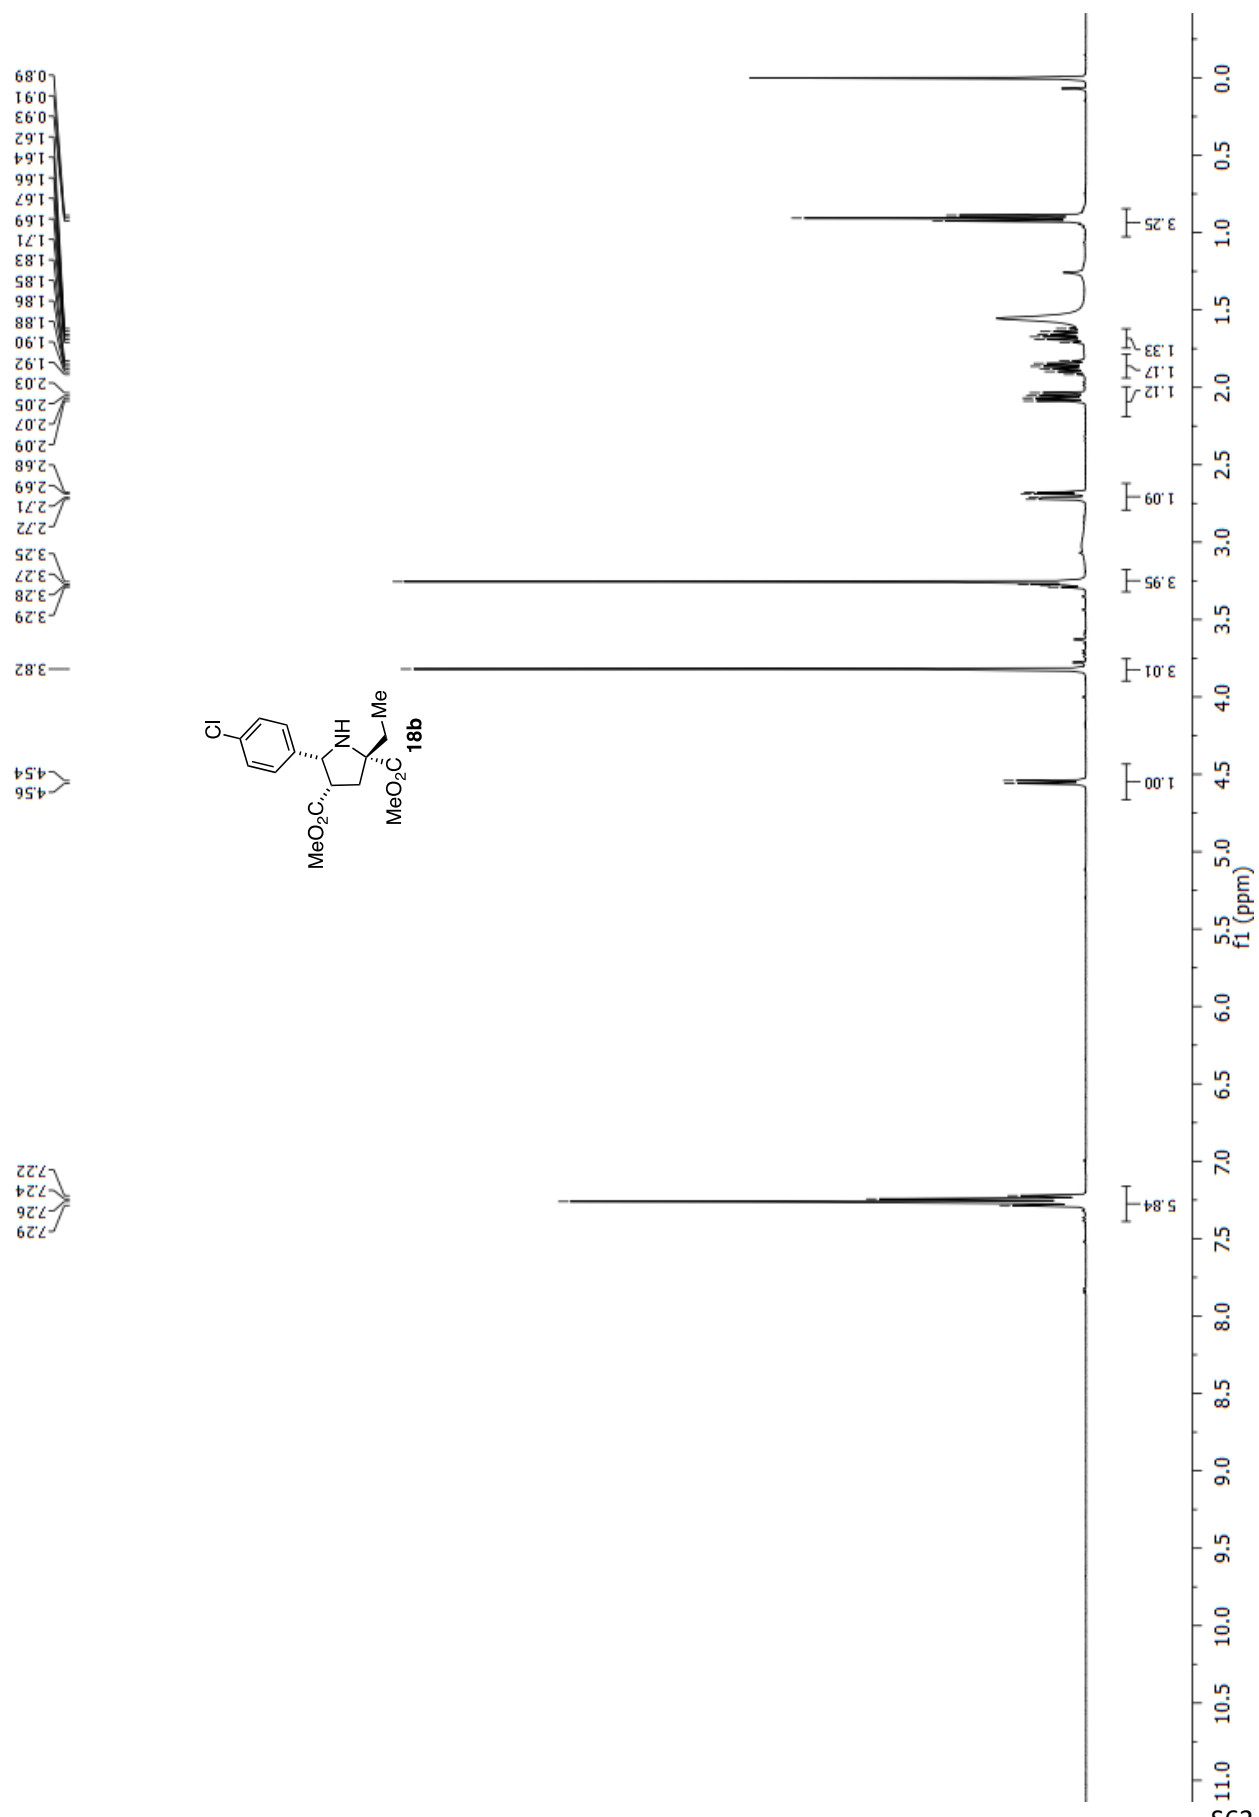

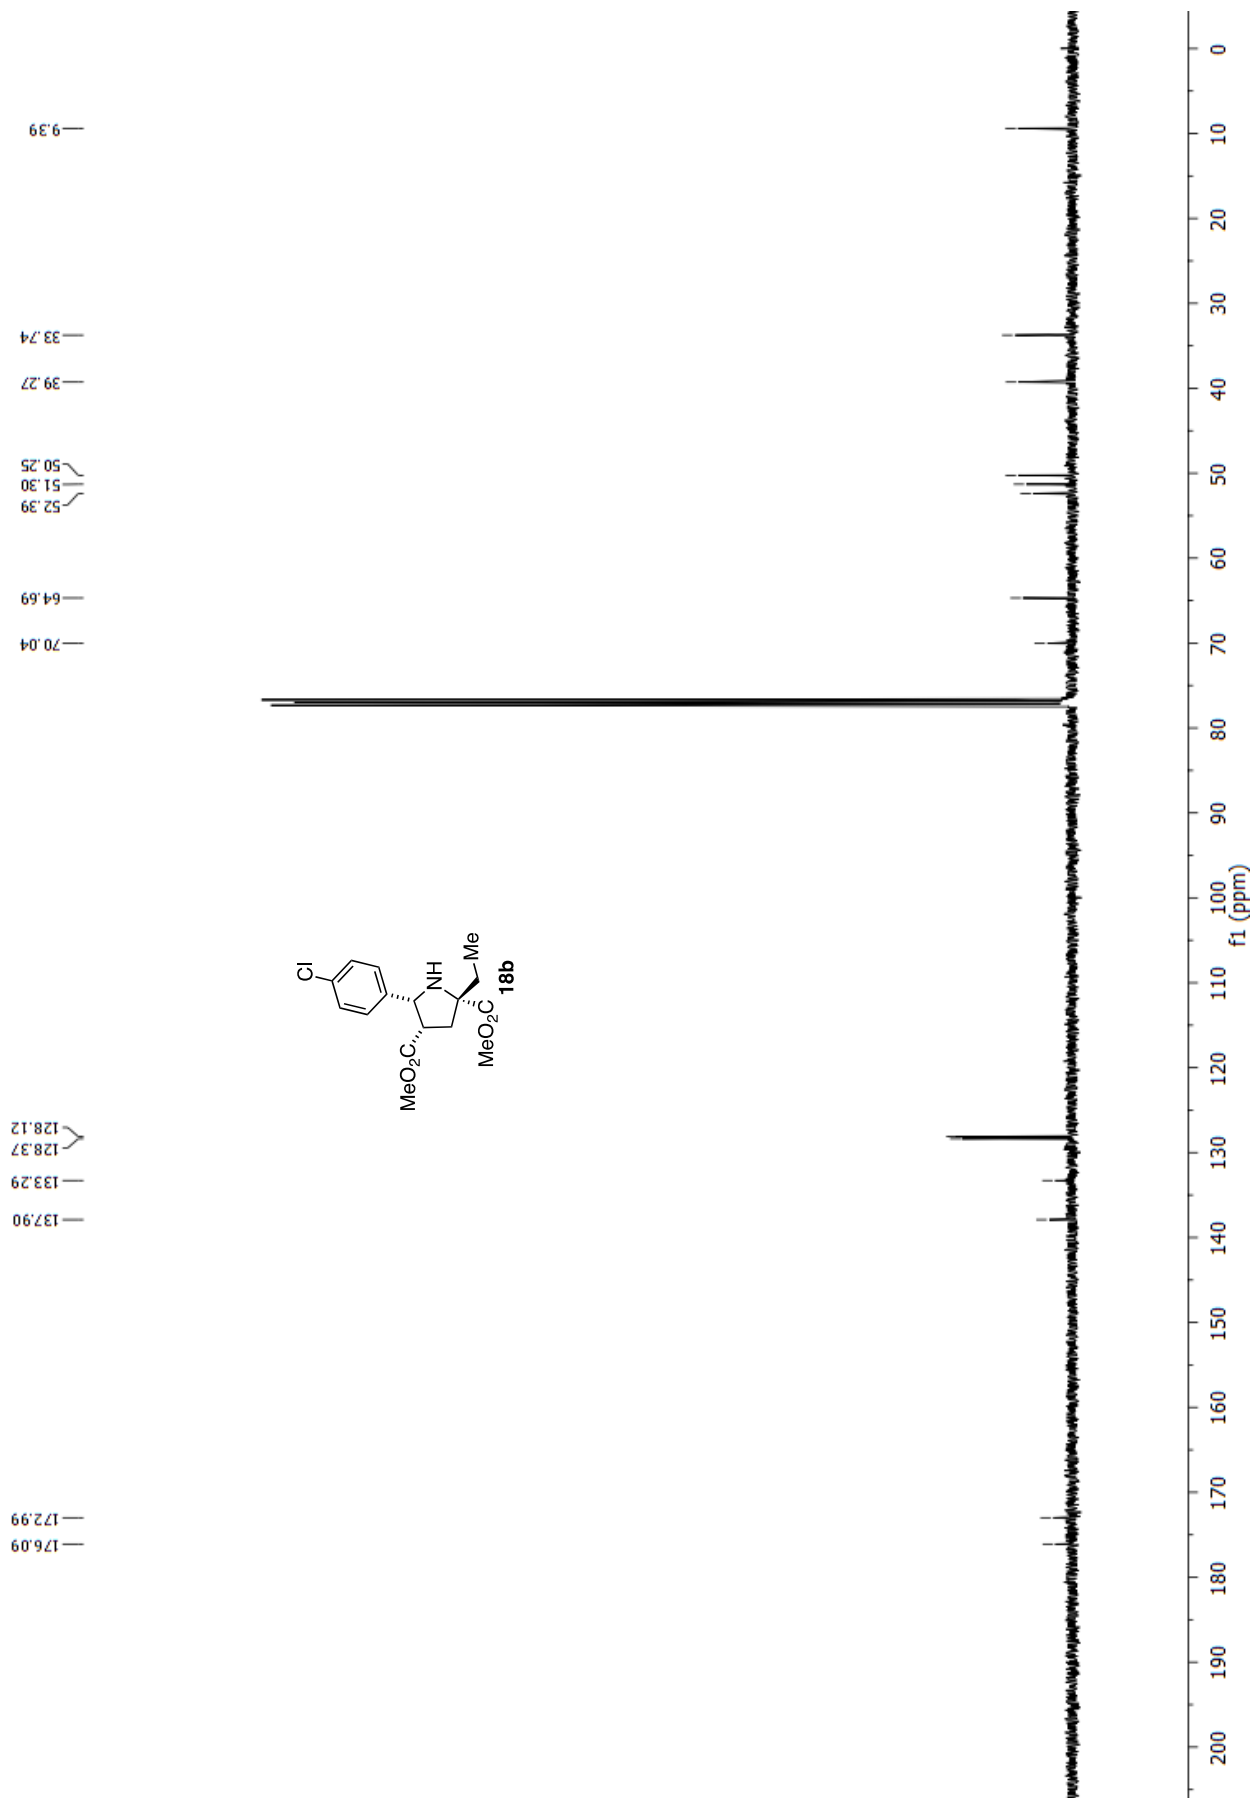



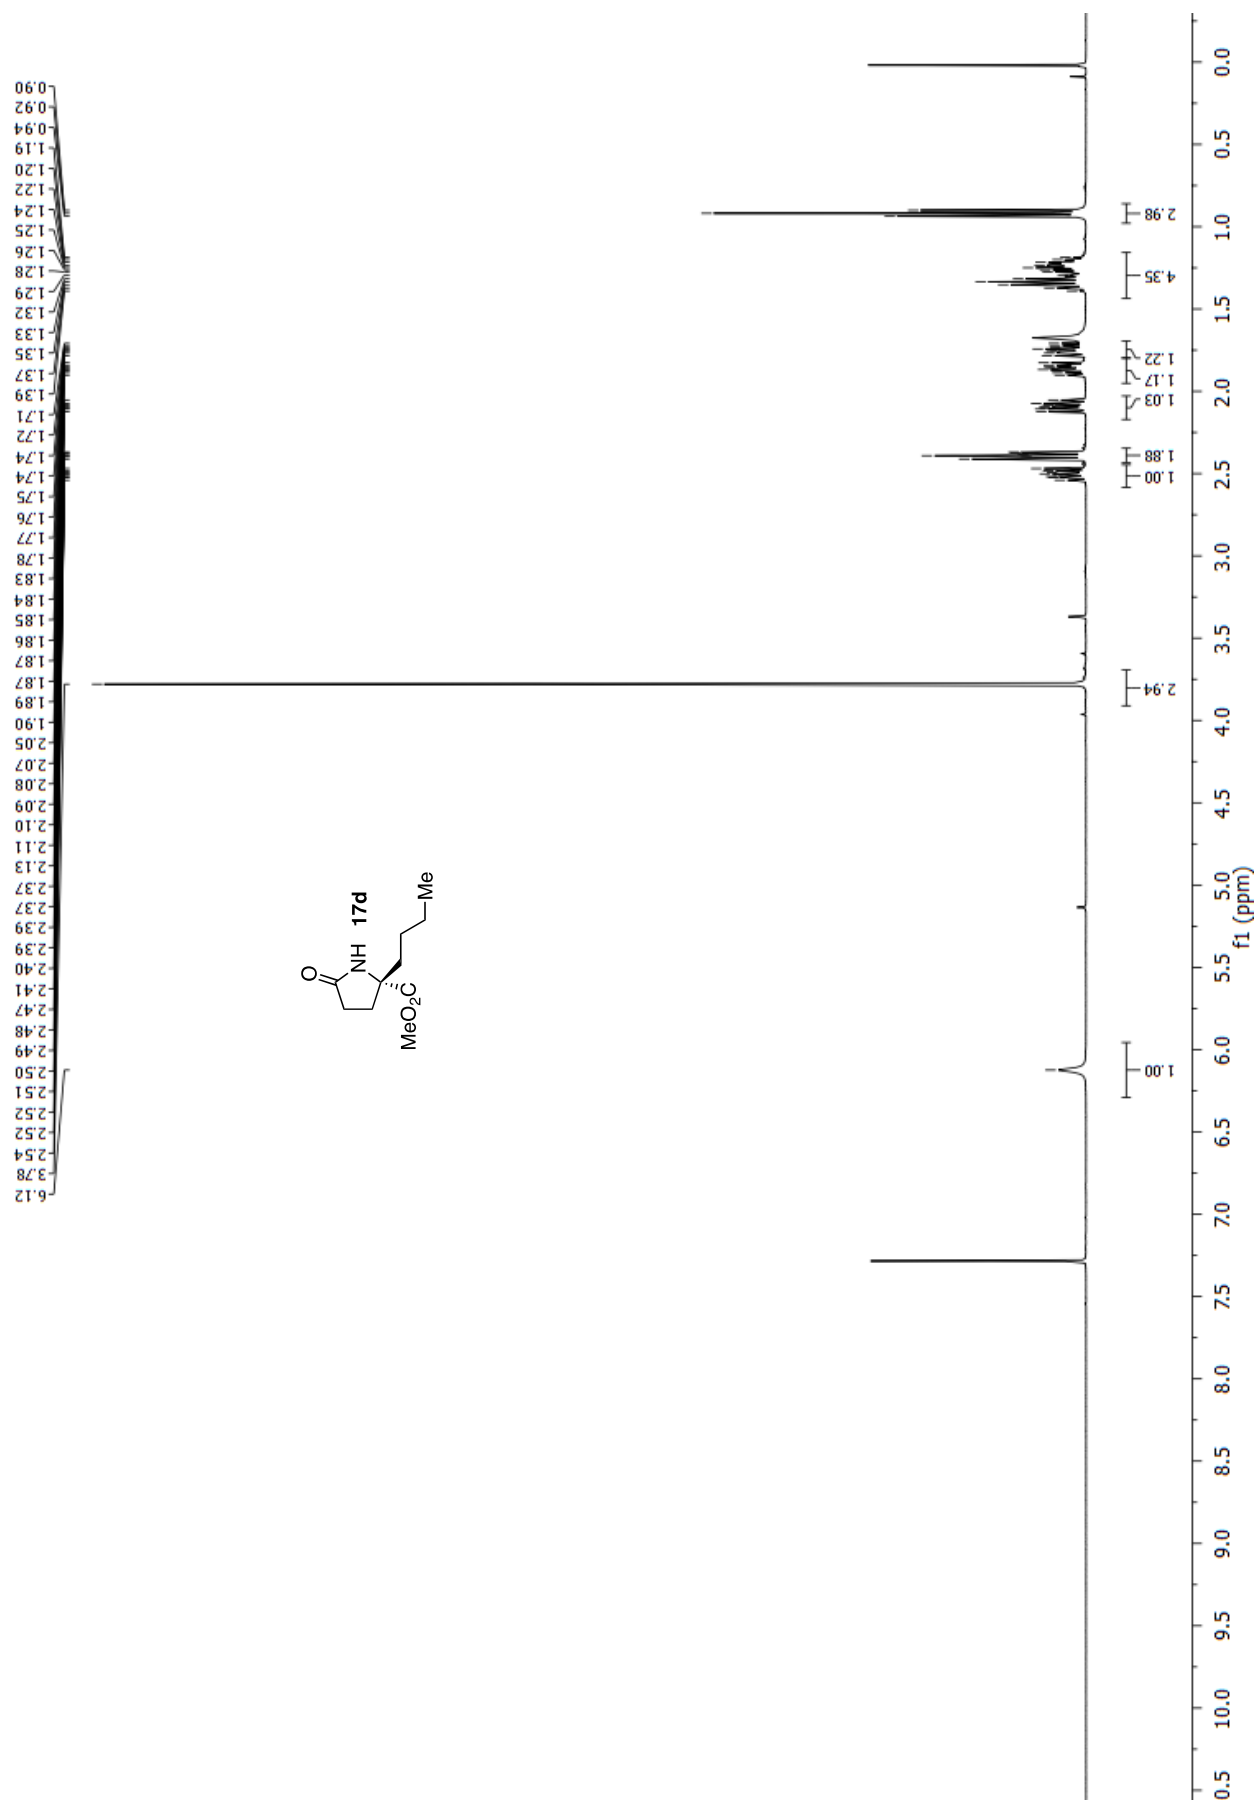

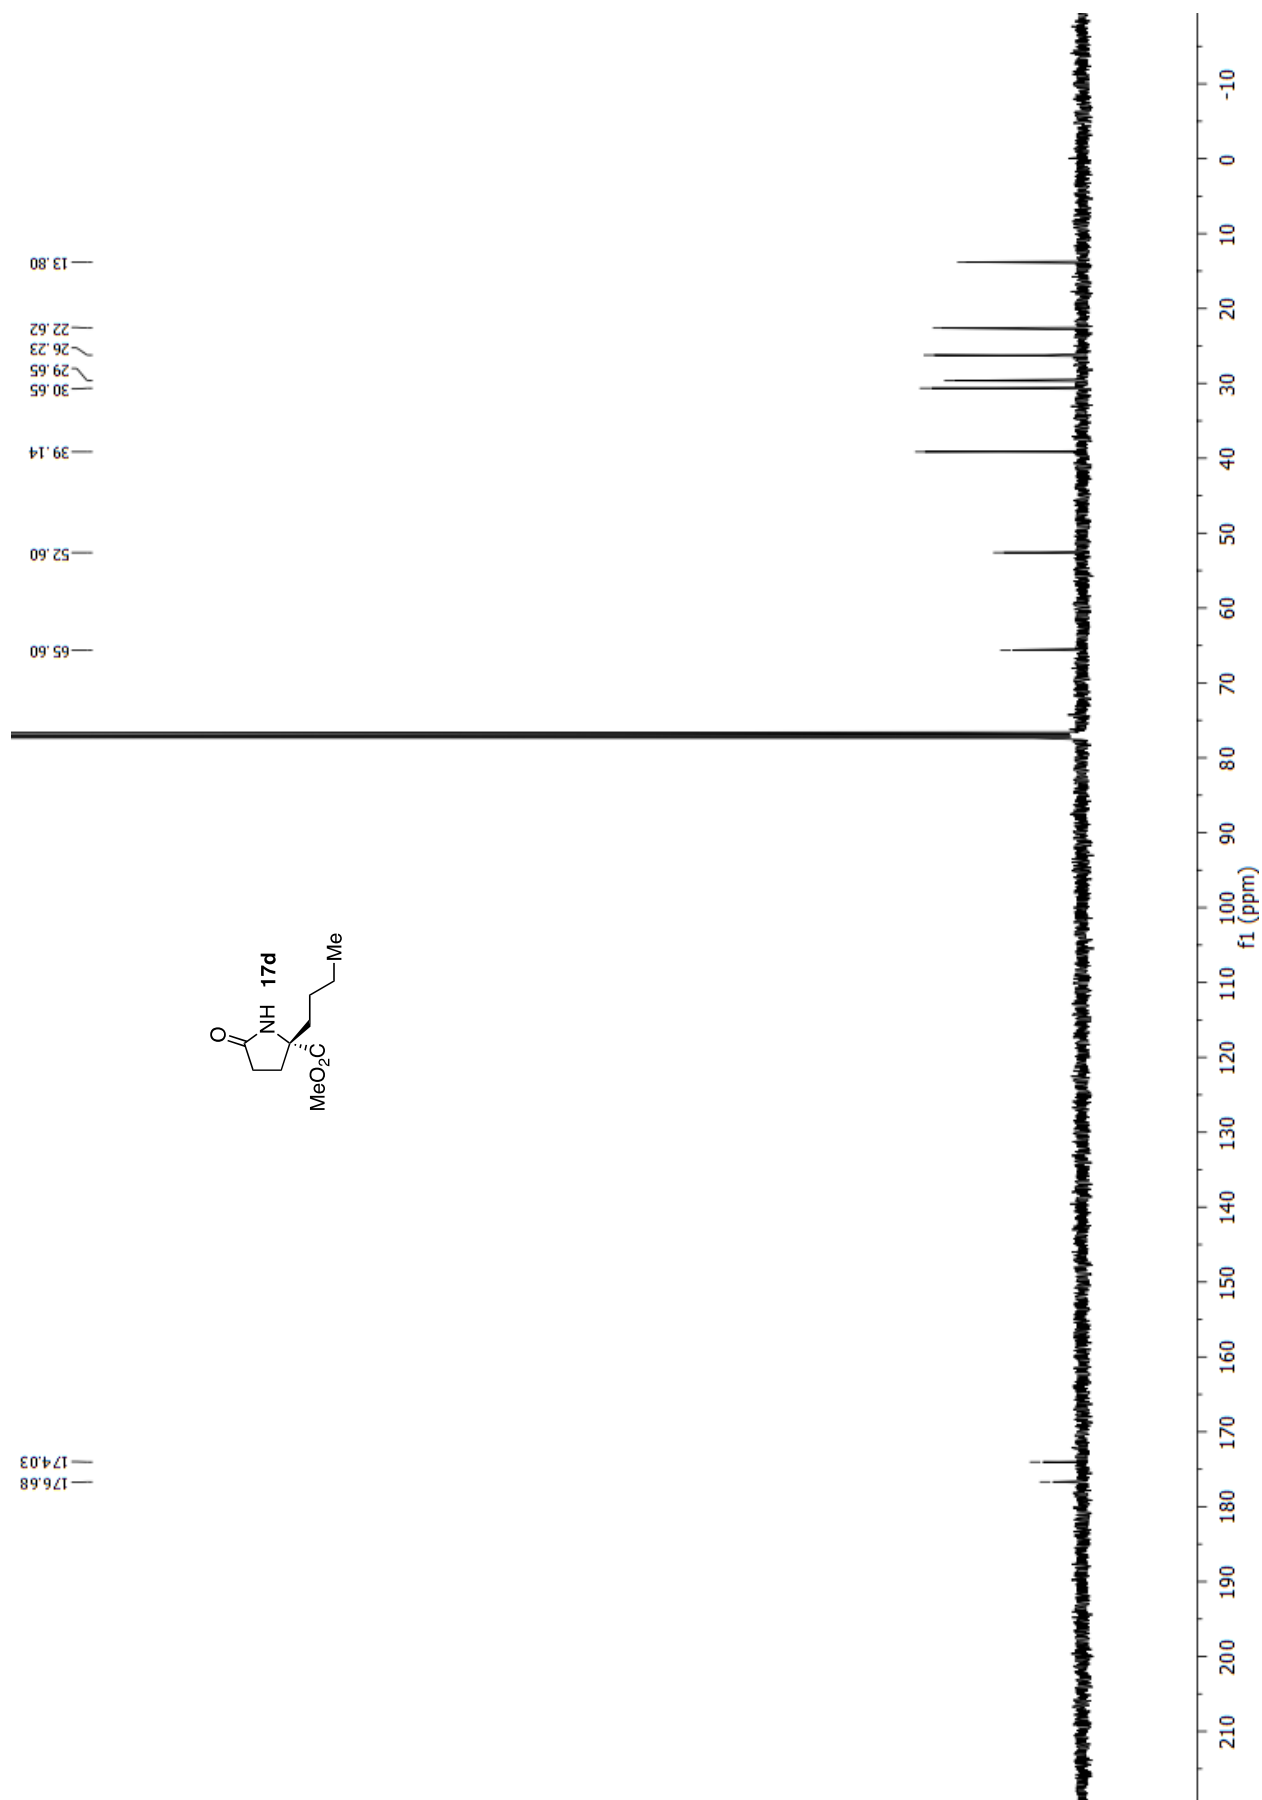

3.83  
3.80

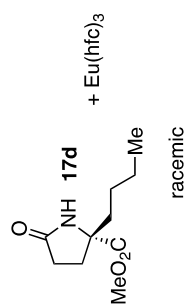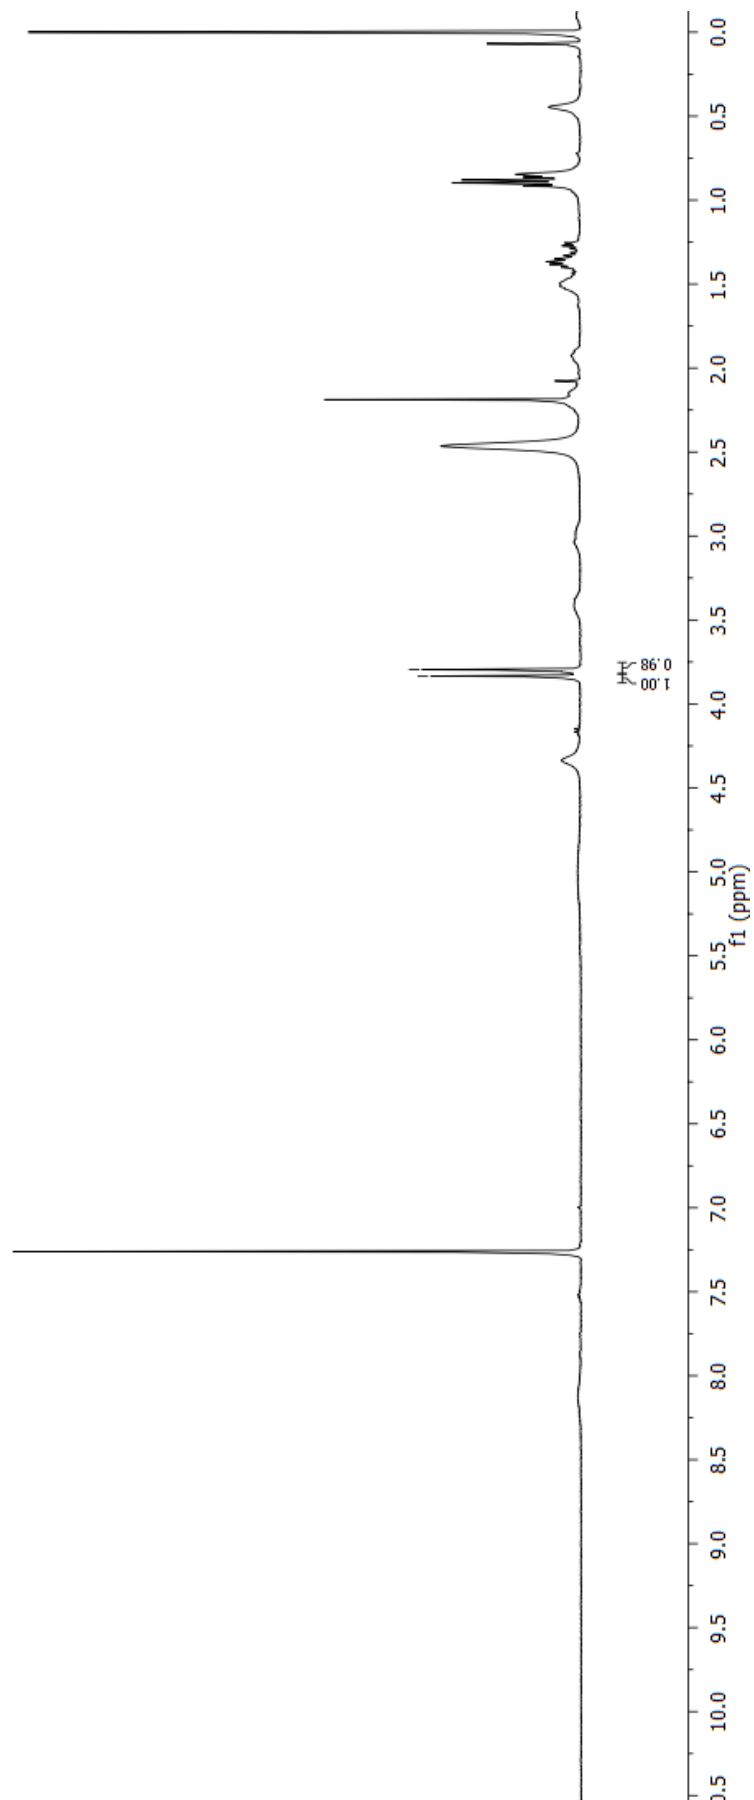

3.88  
3.83

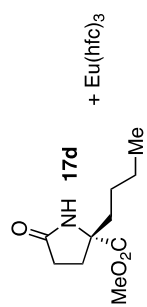

scalemic

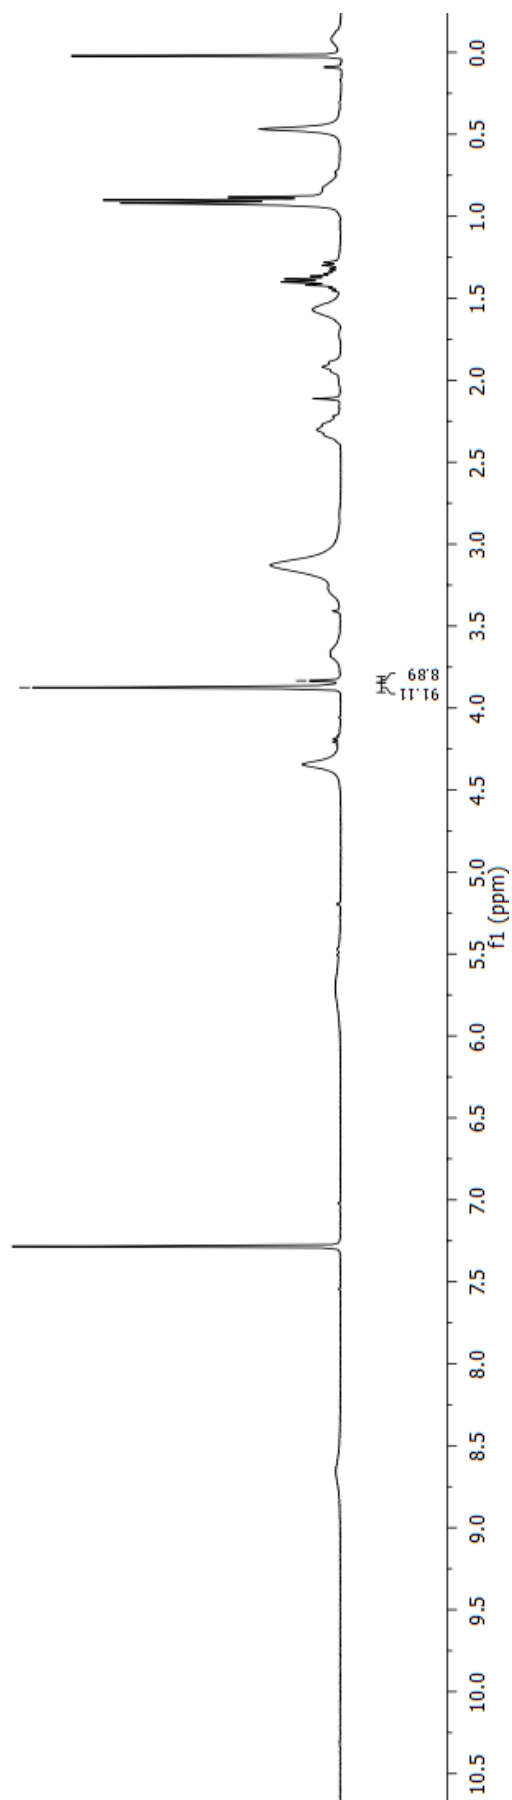

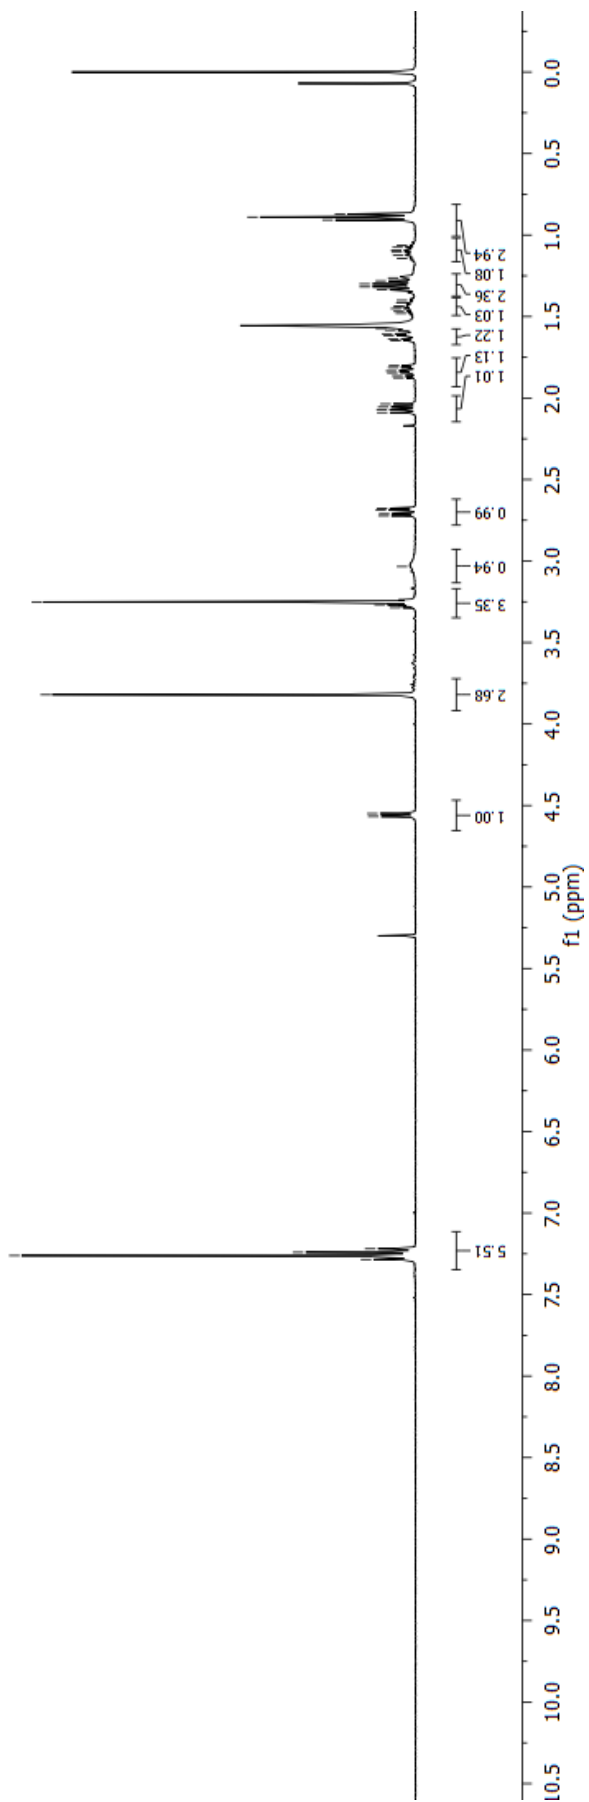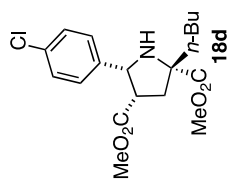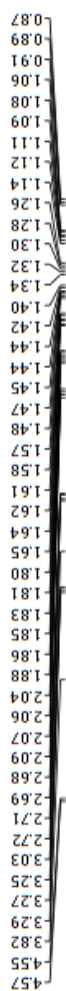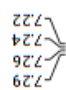

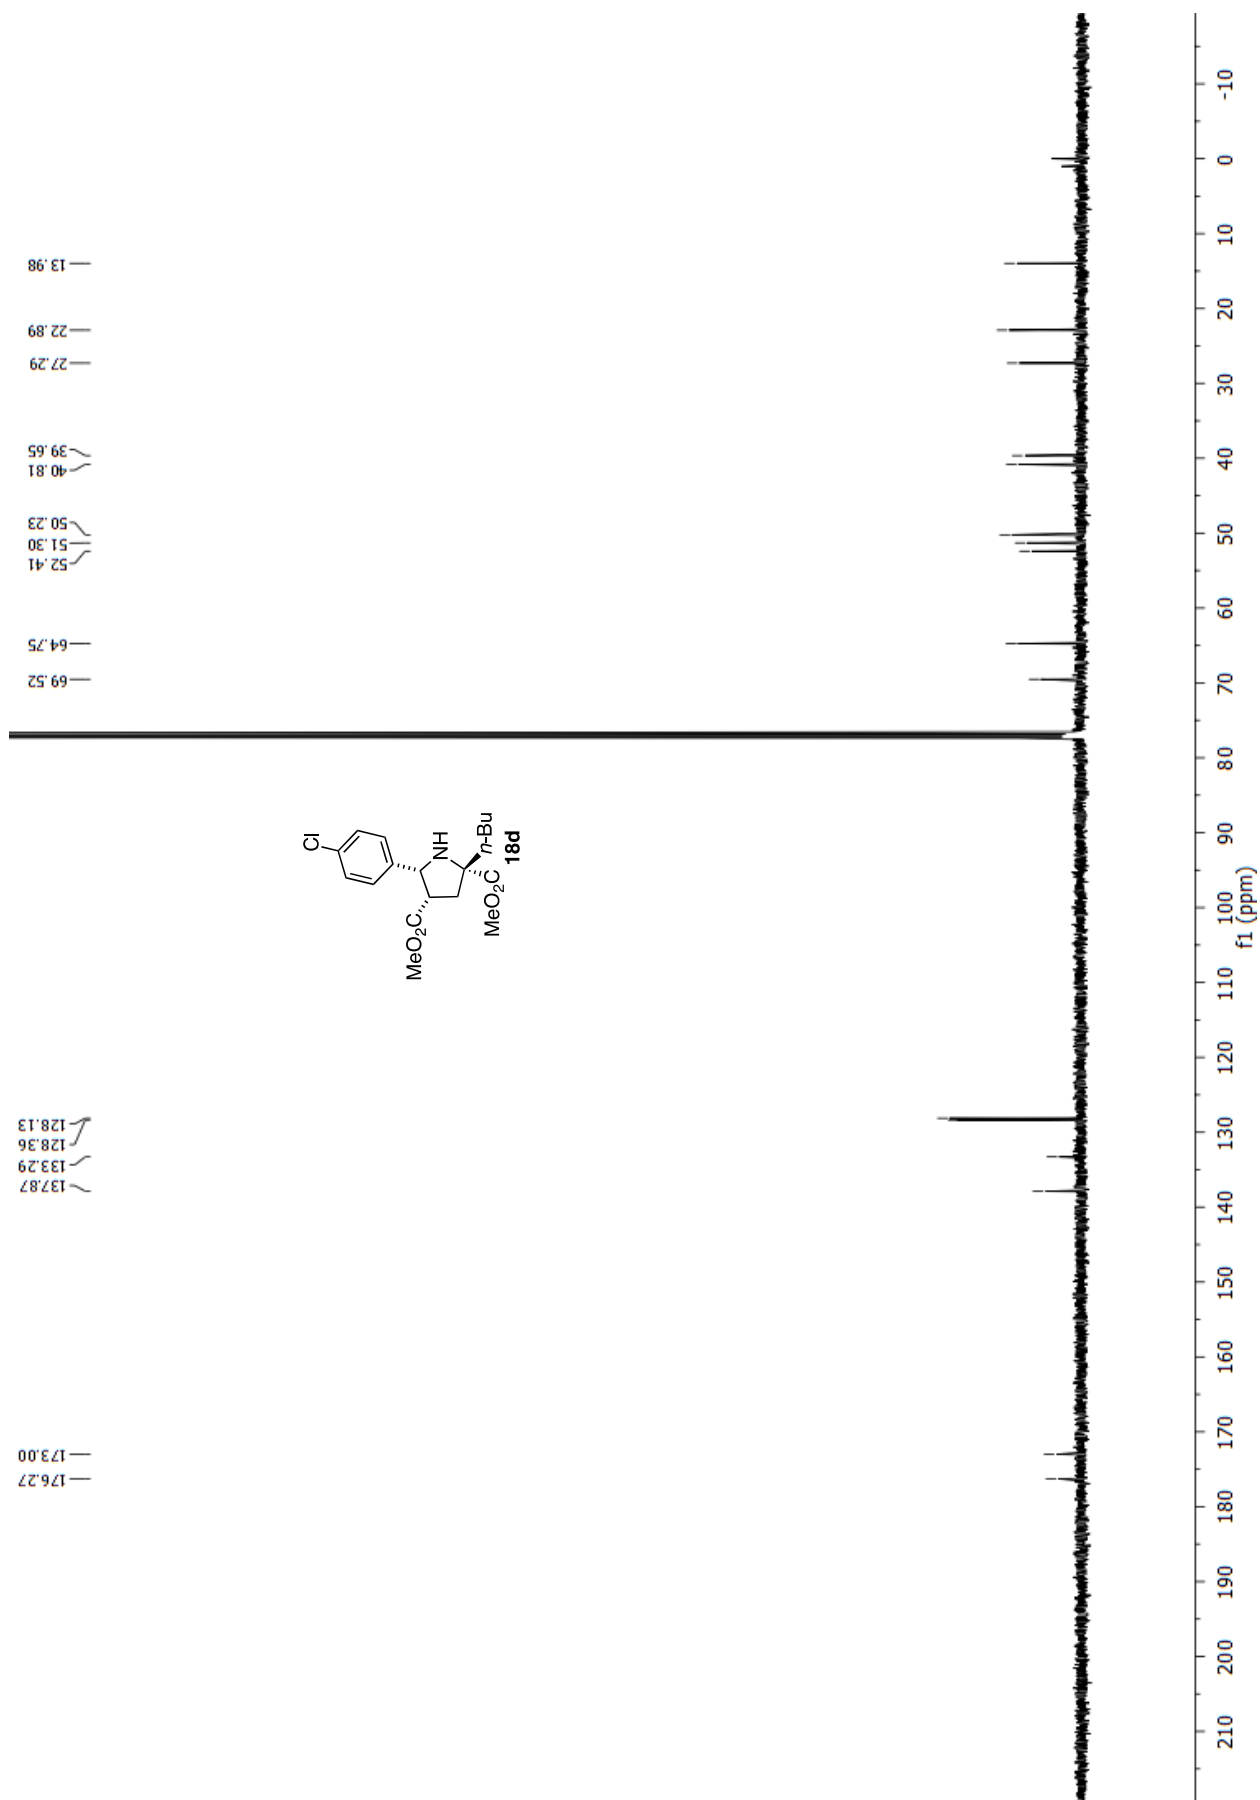

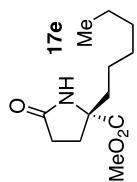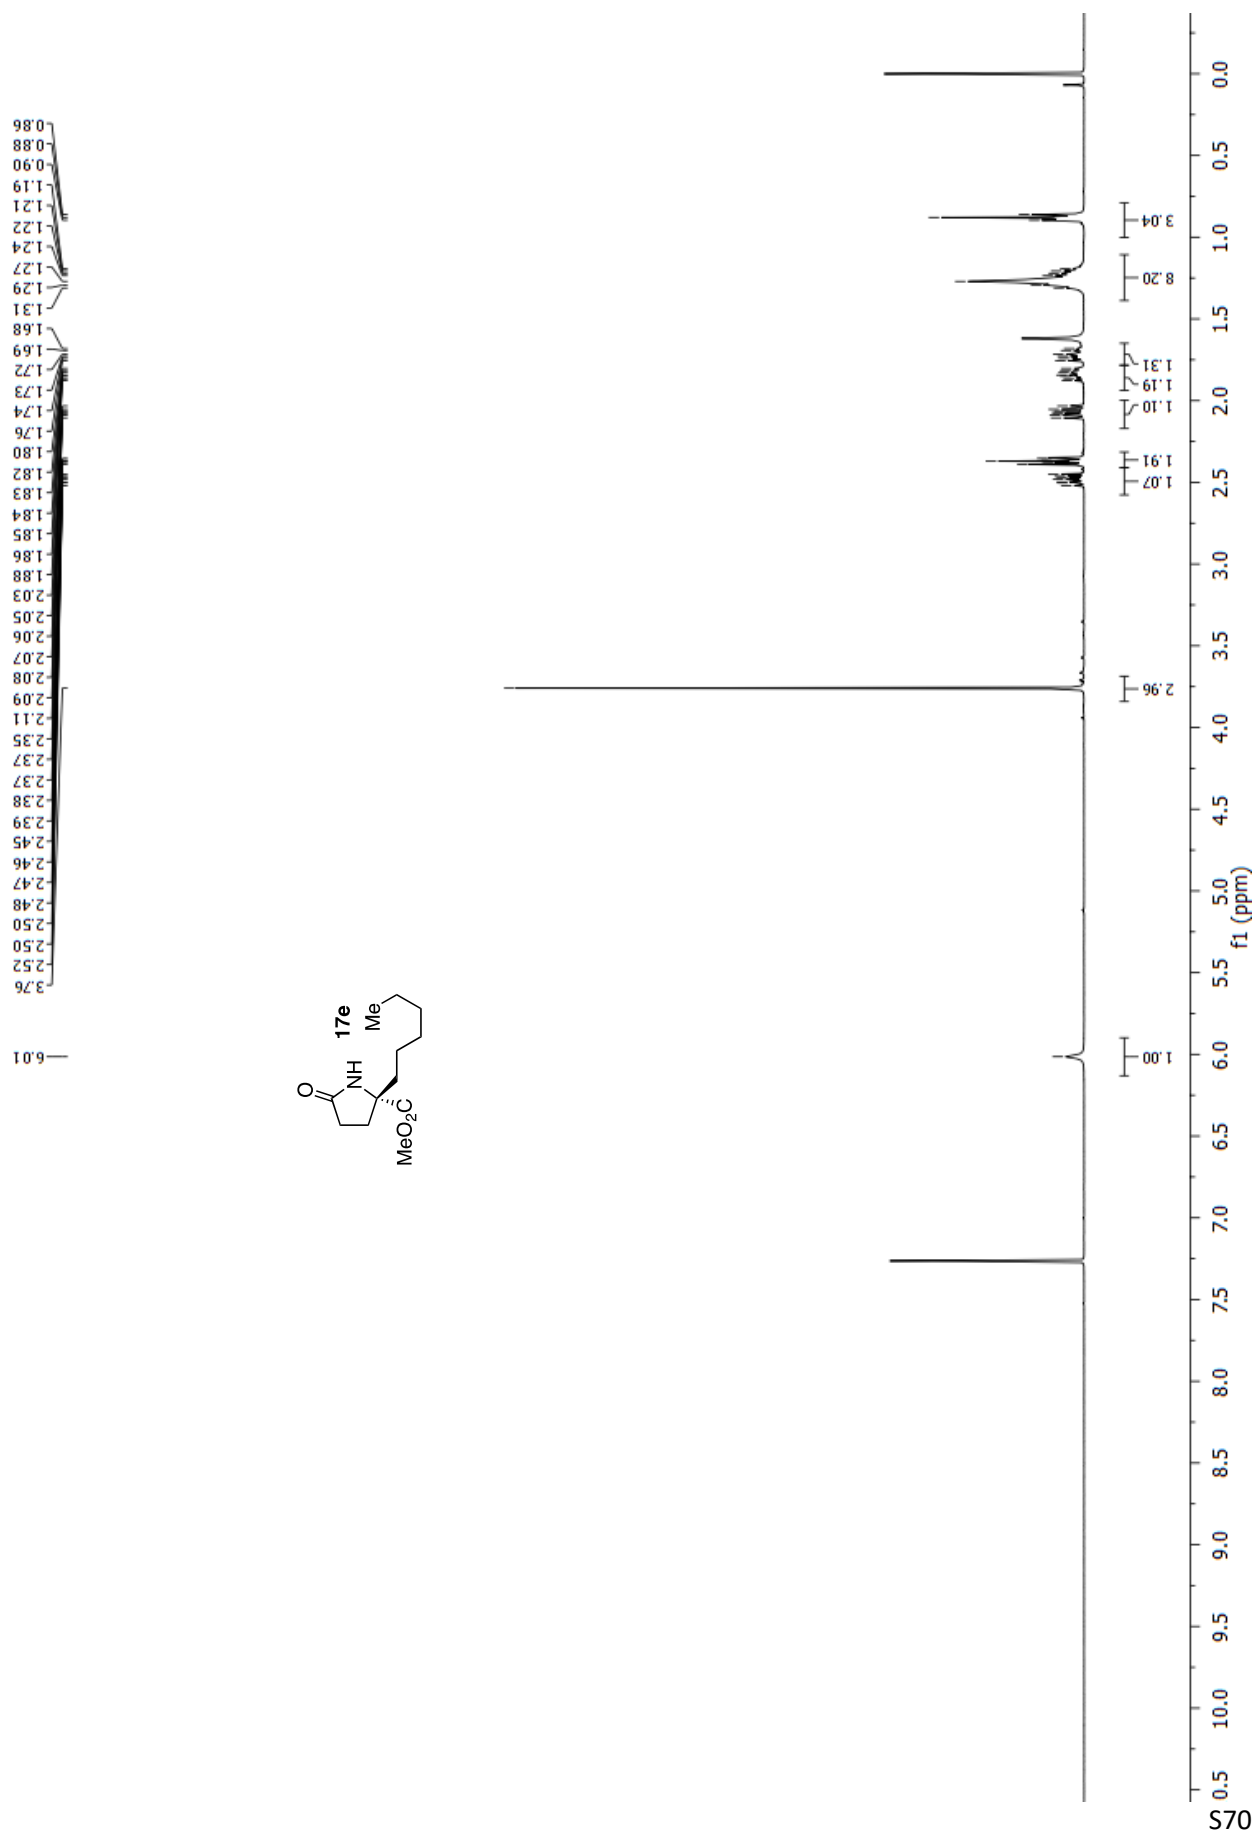

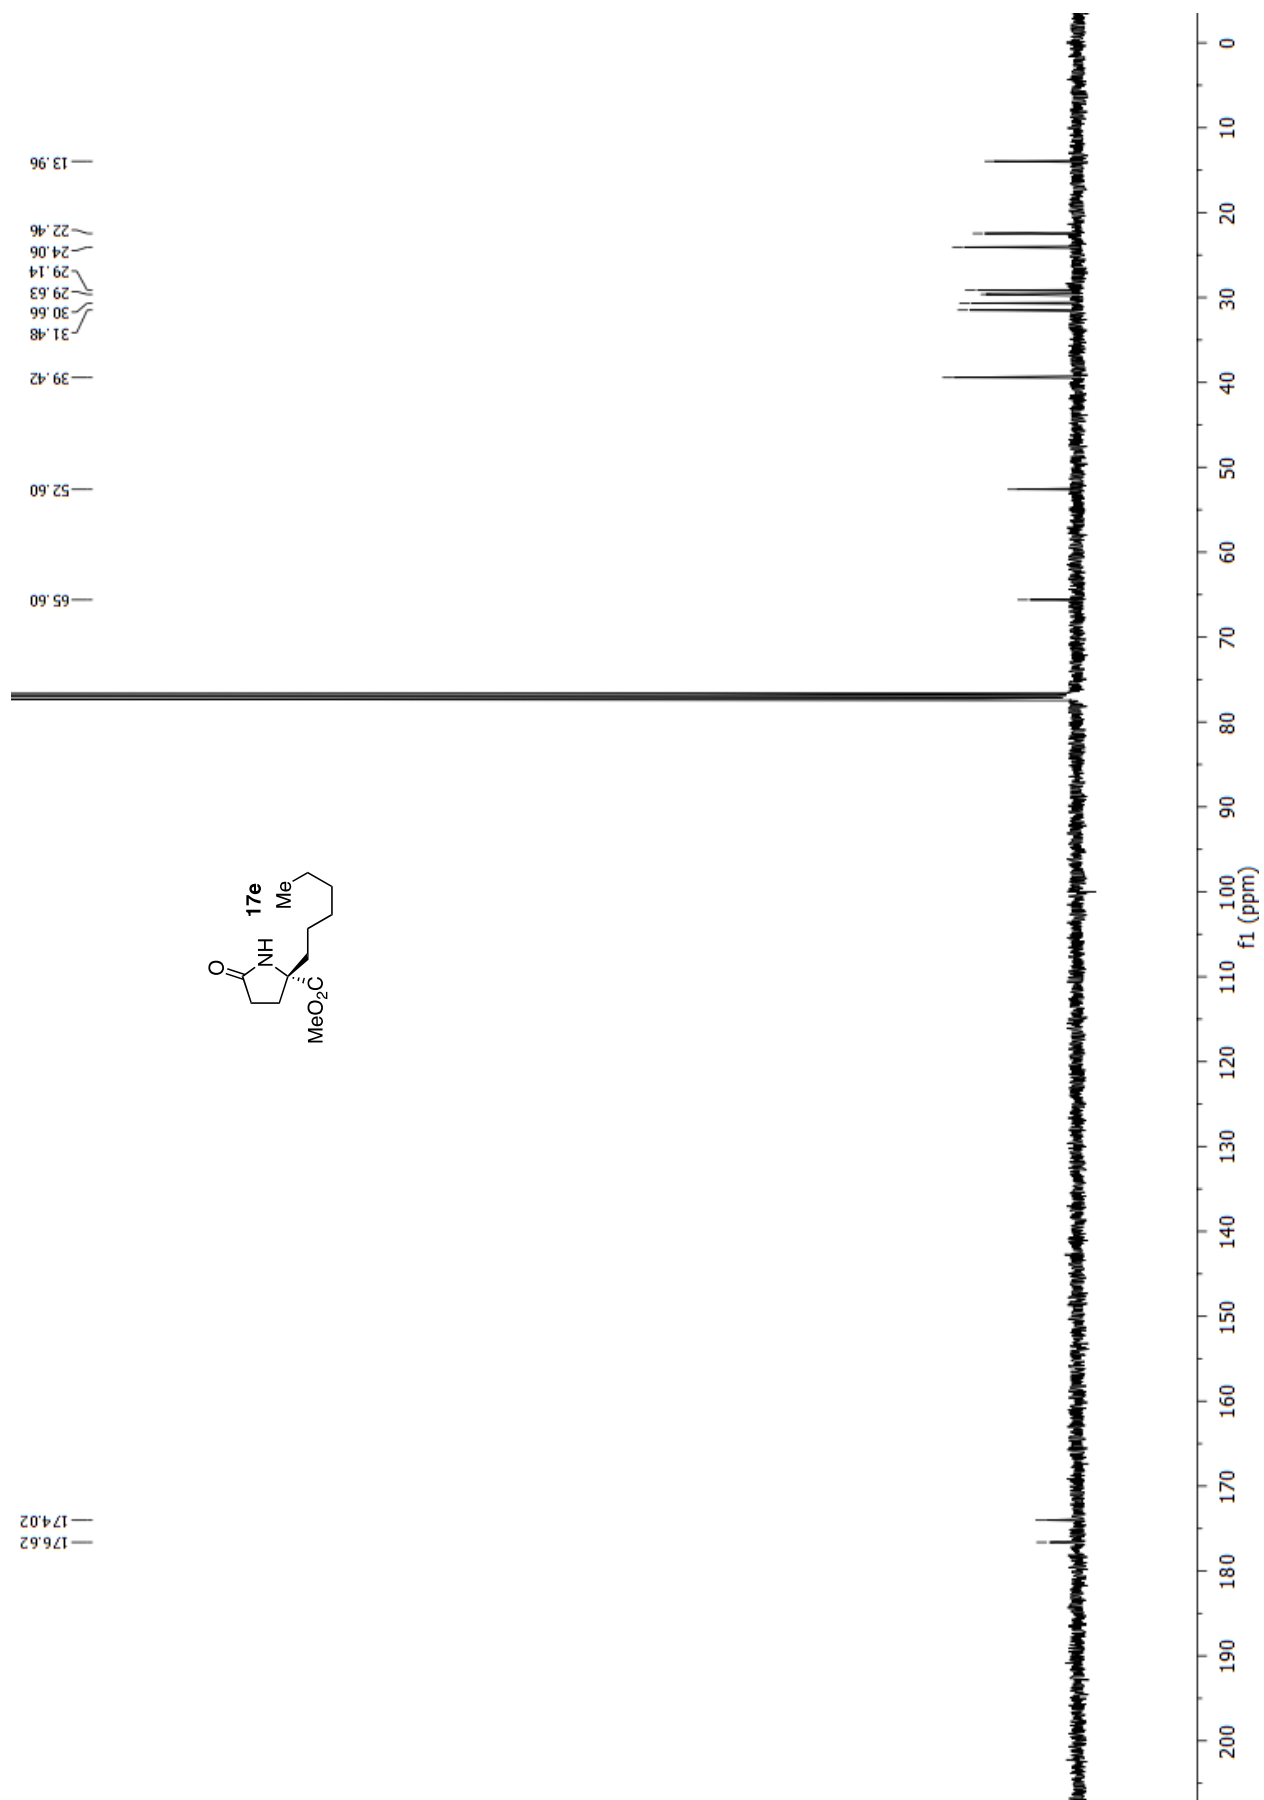



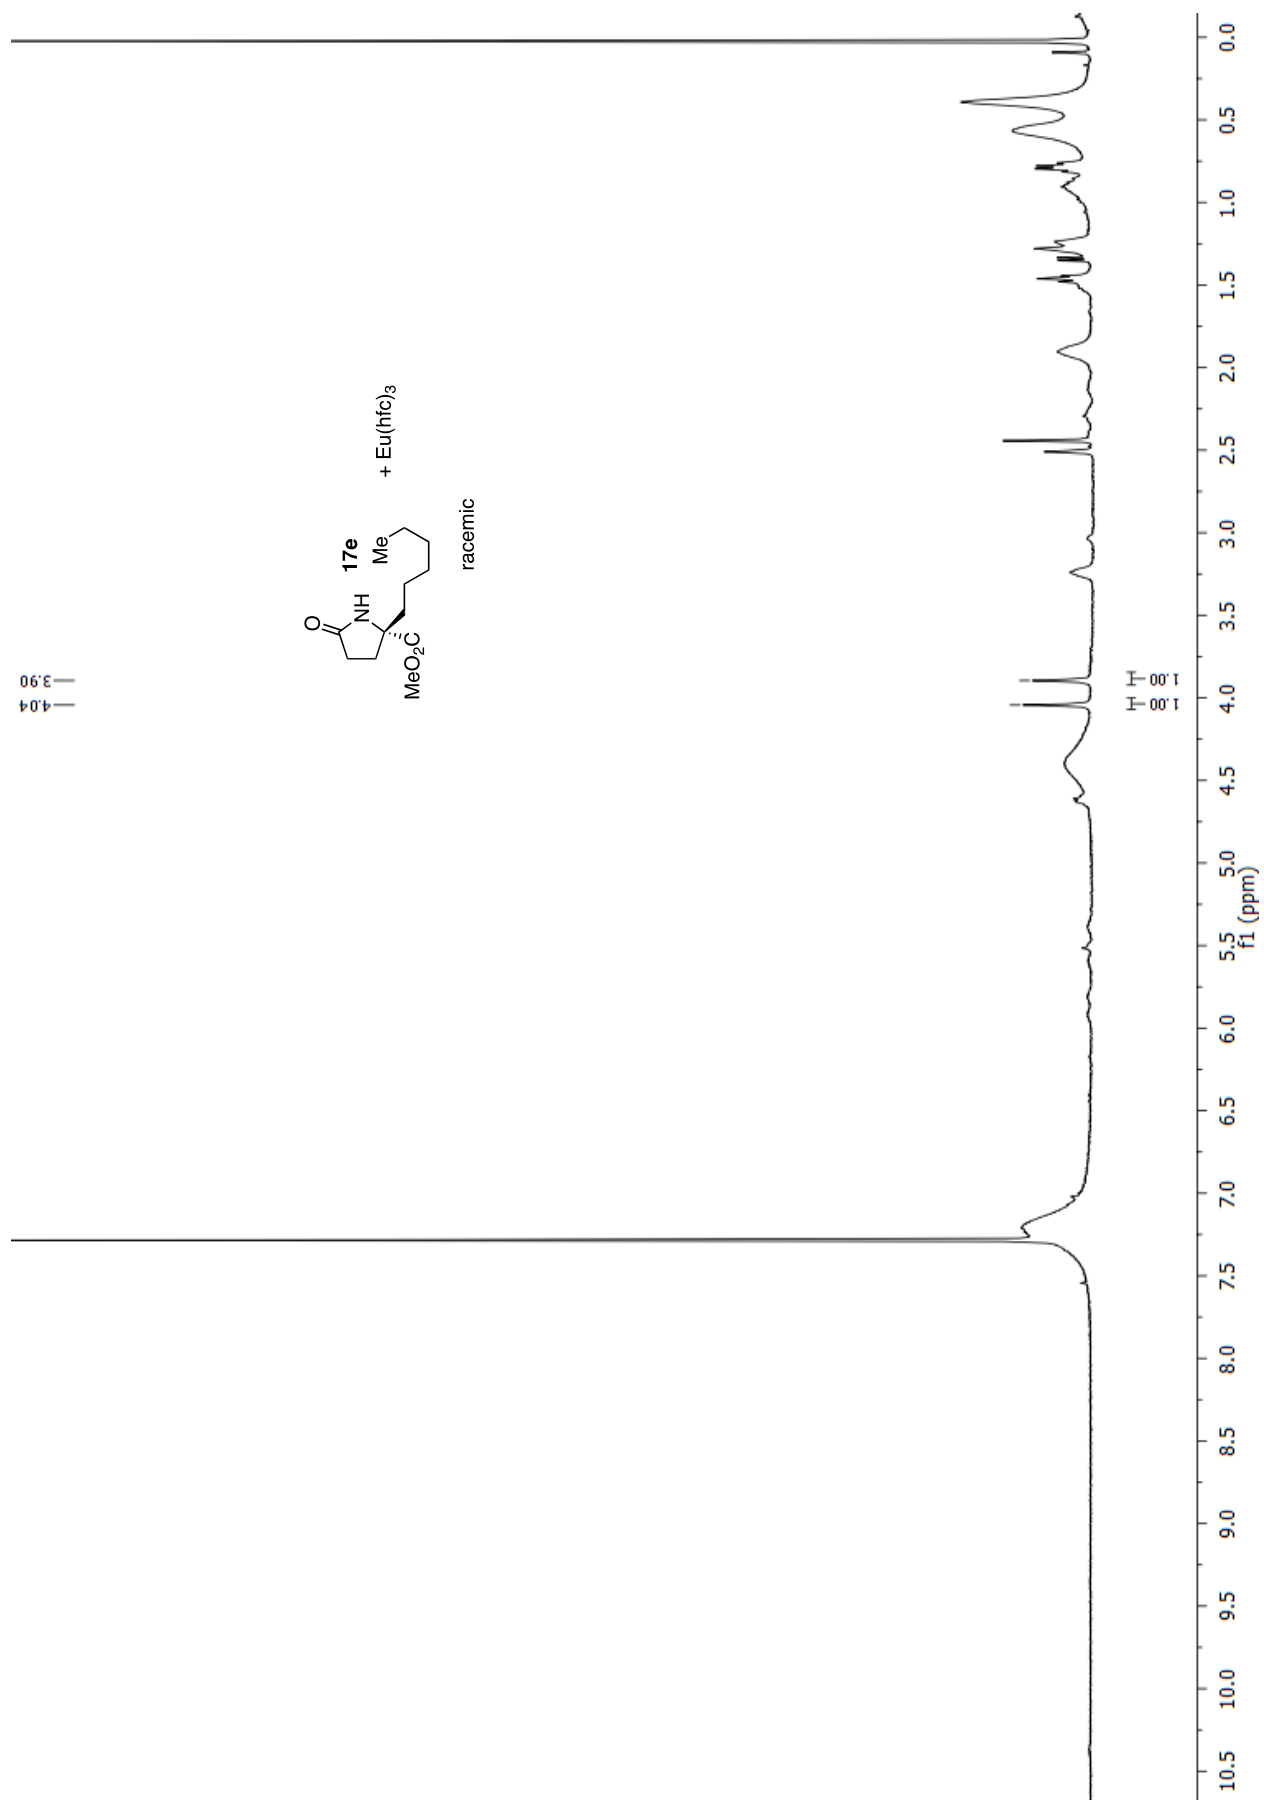

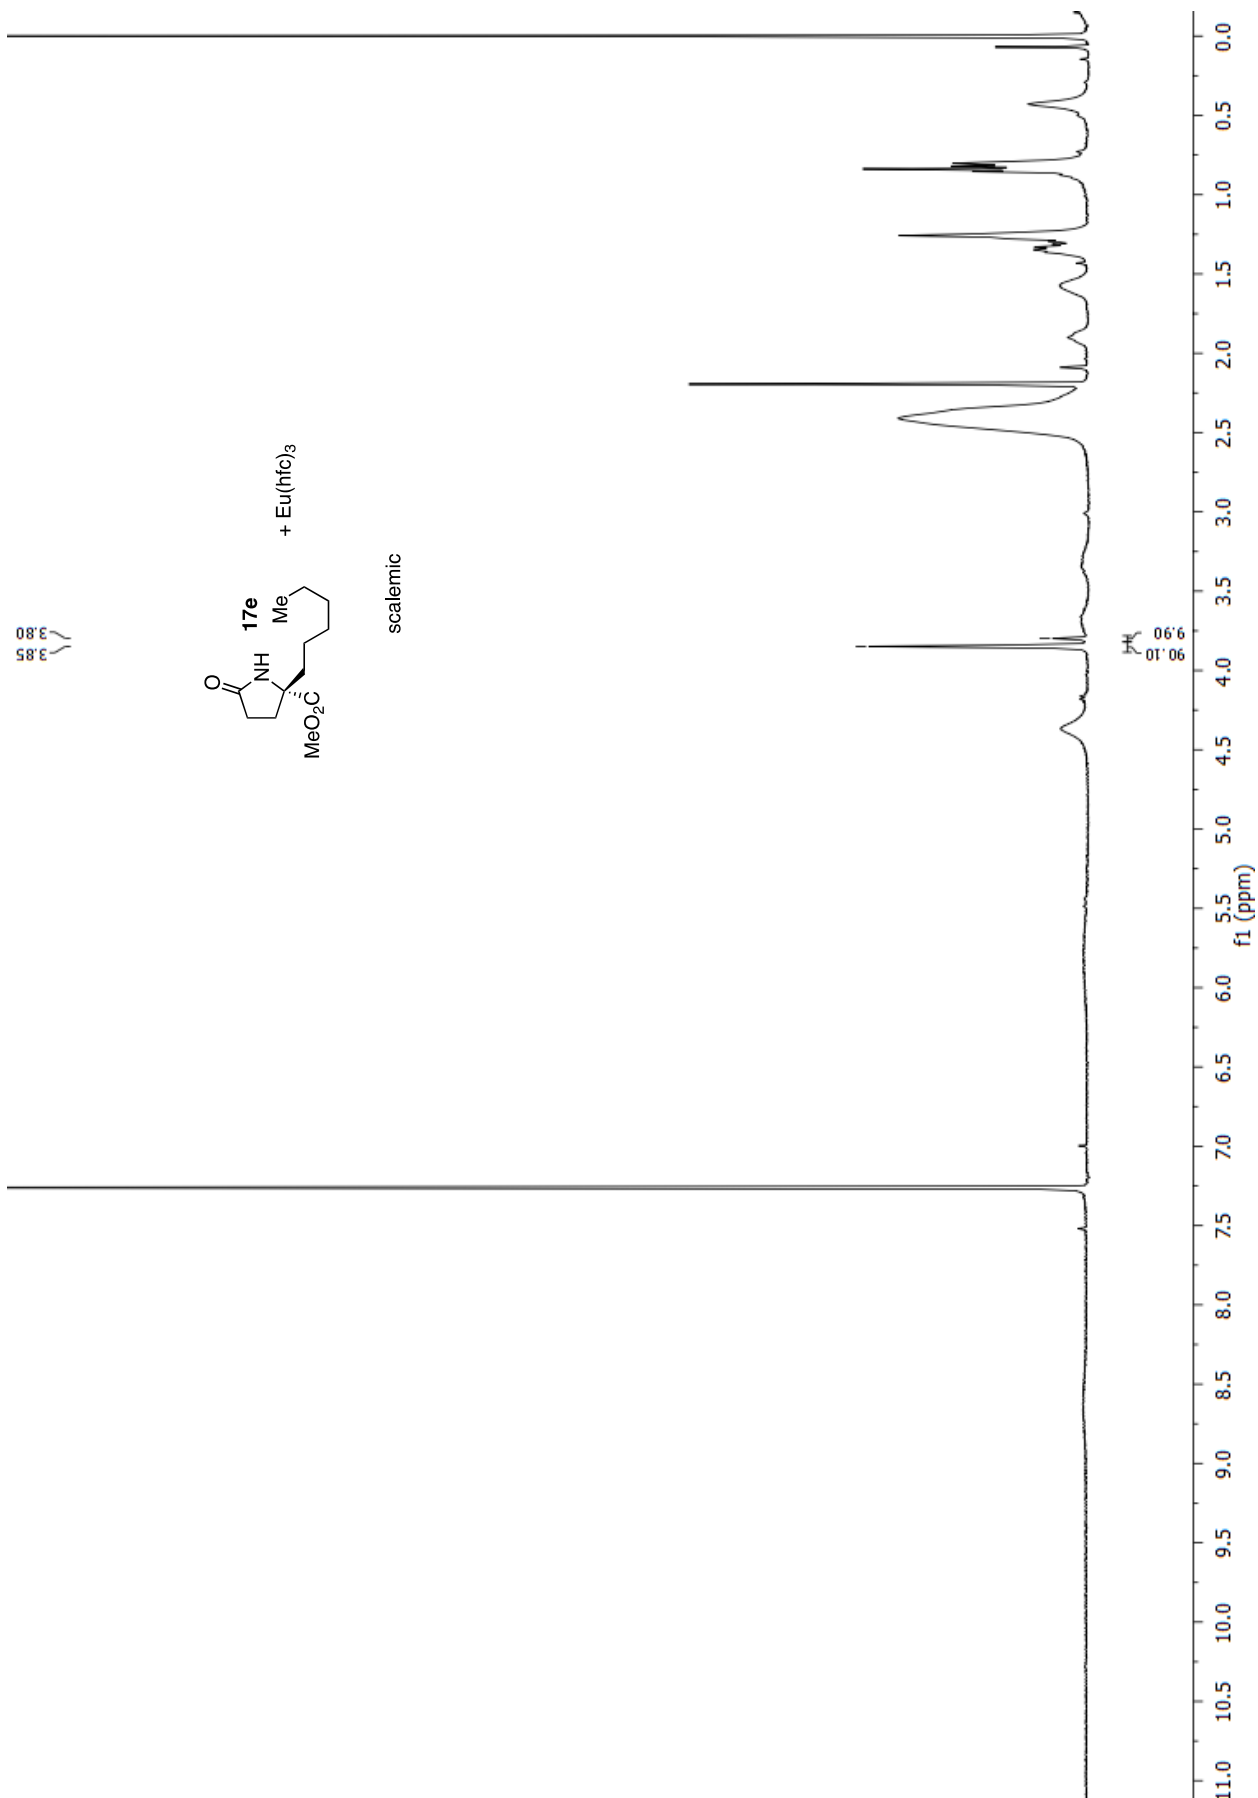

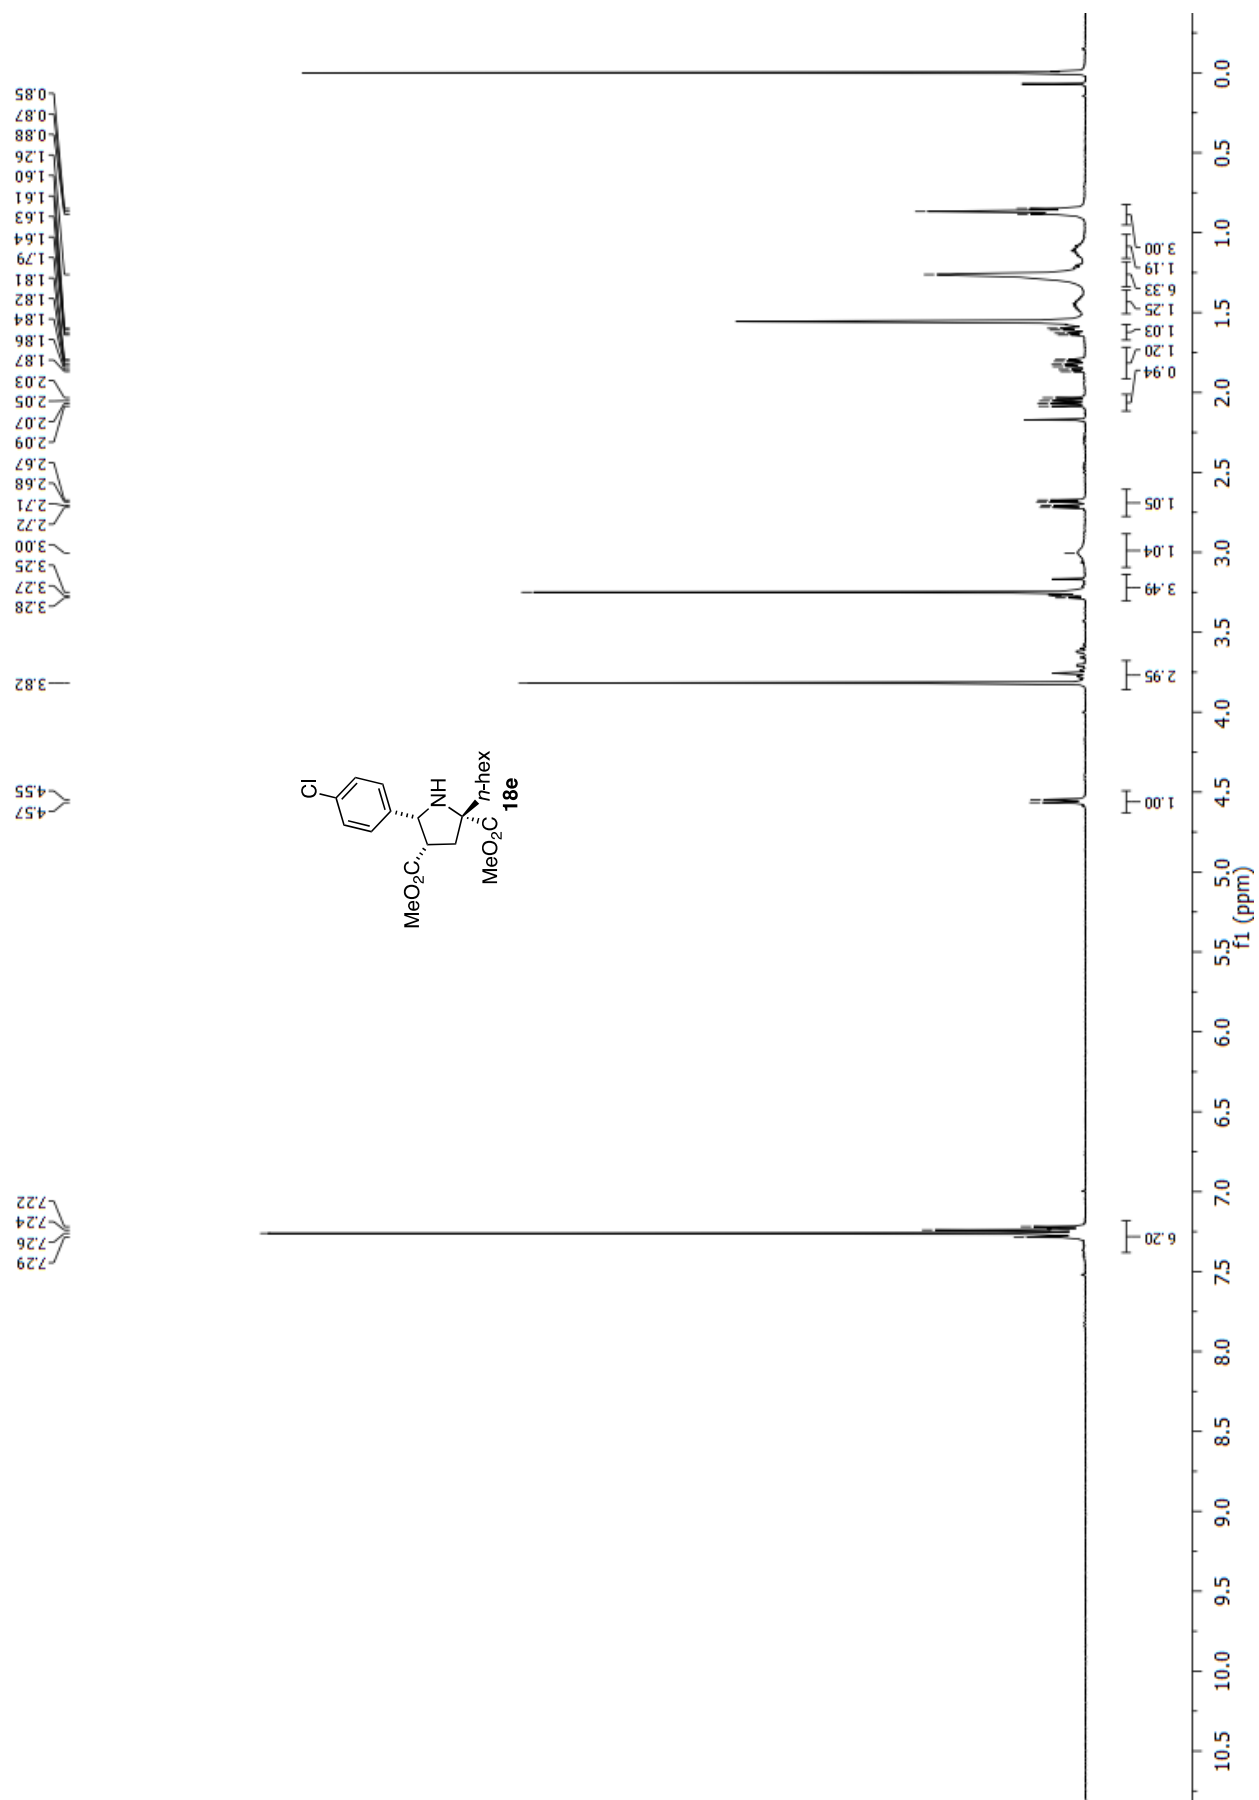

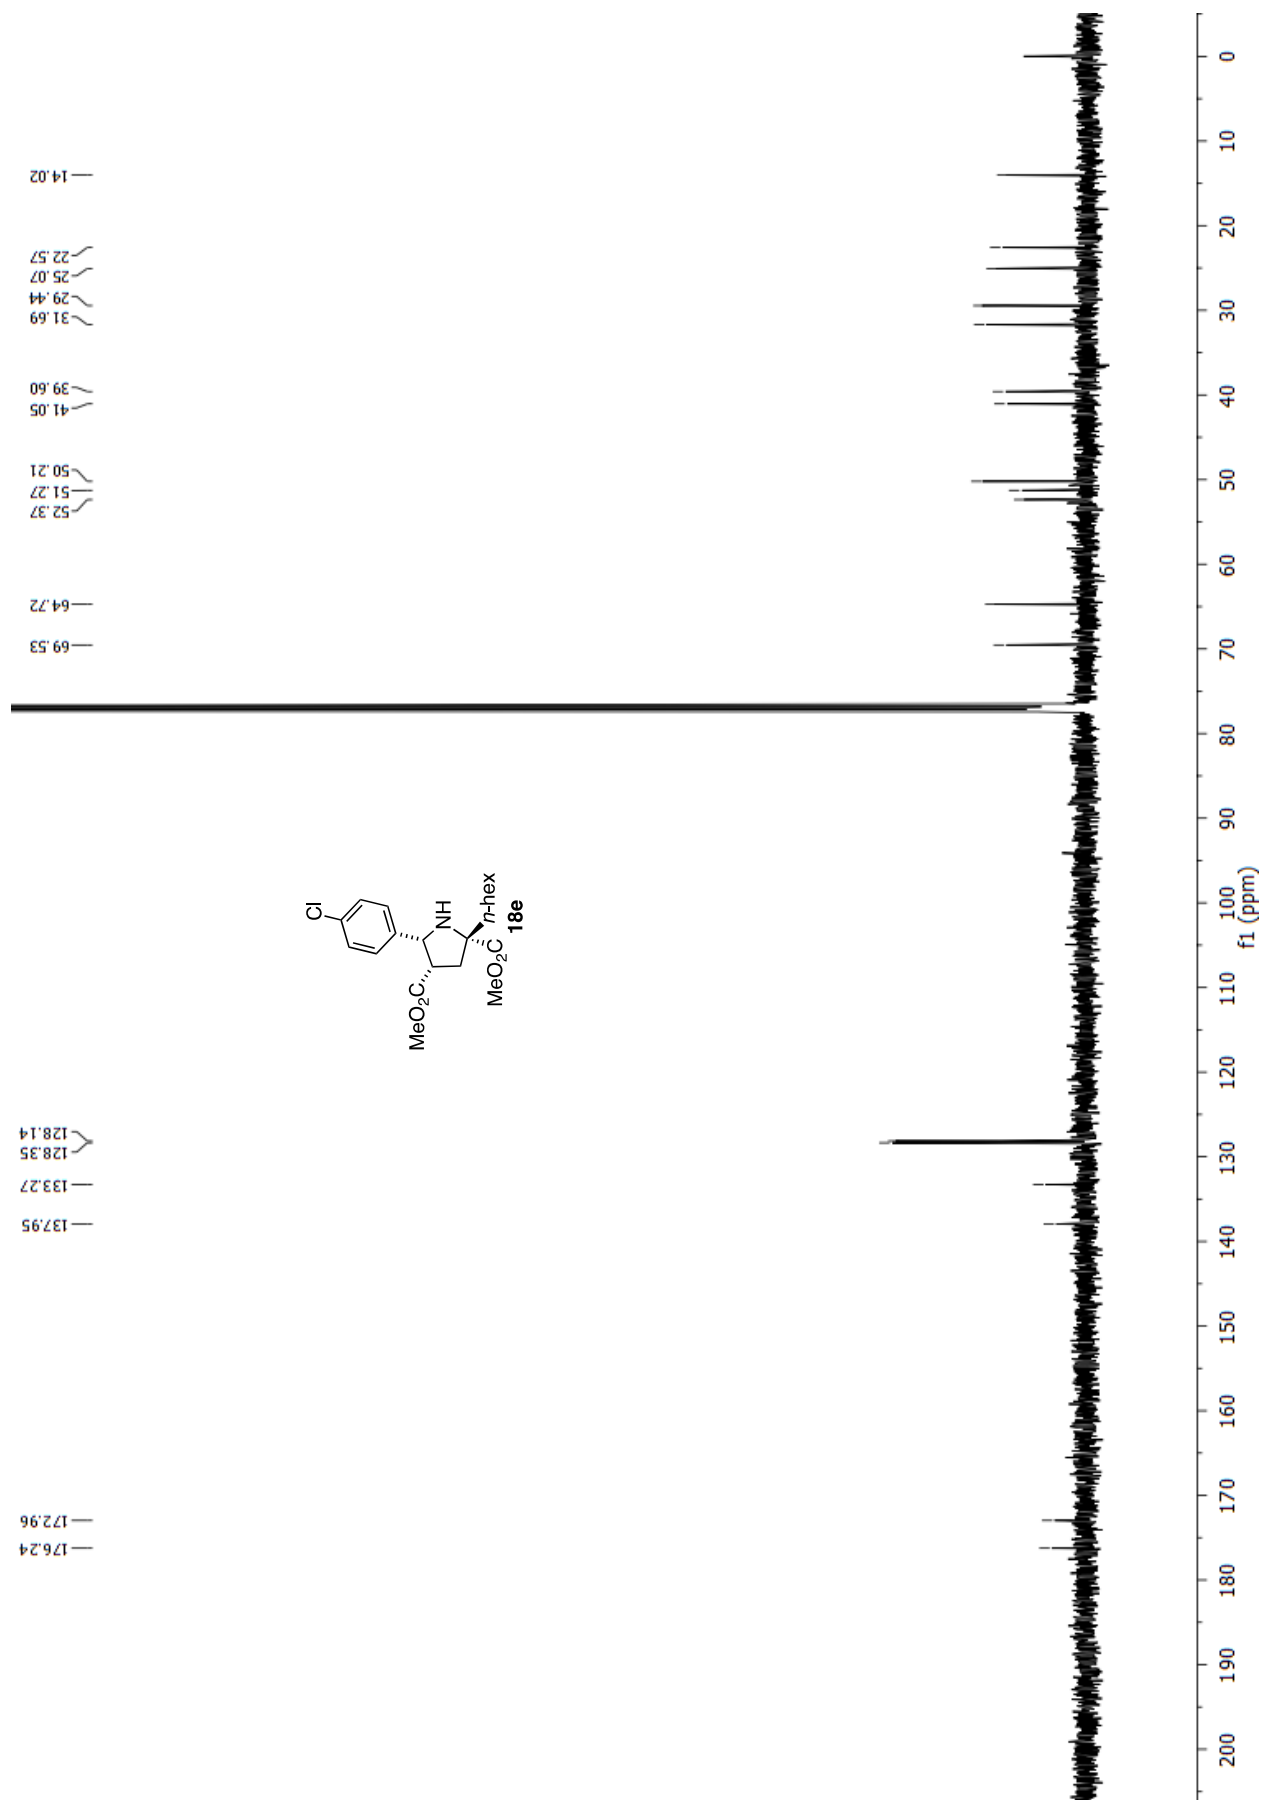

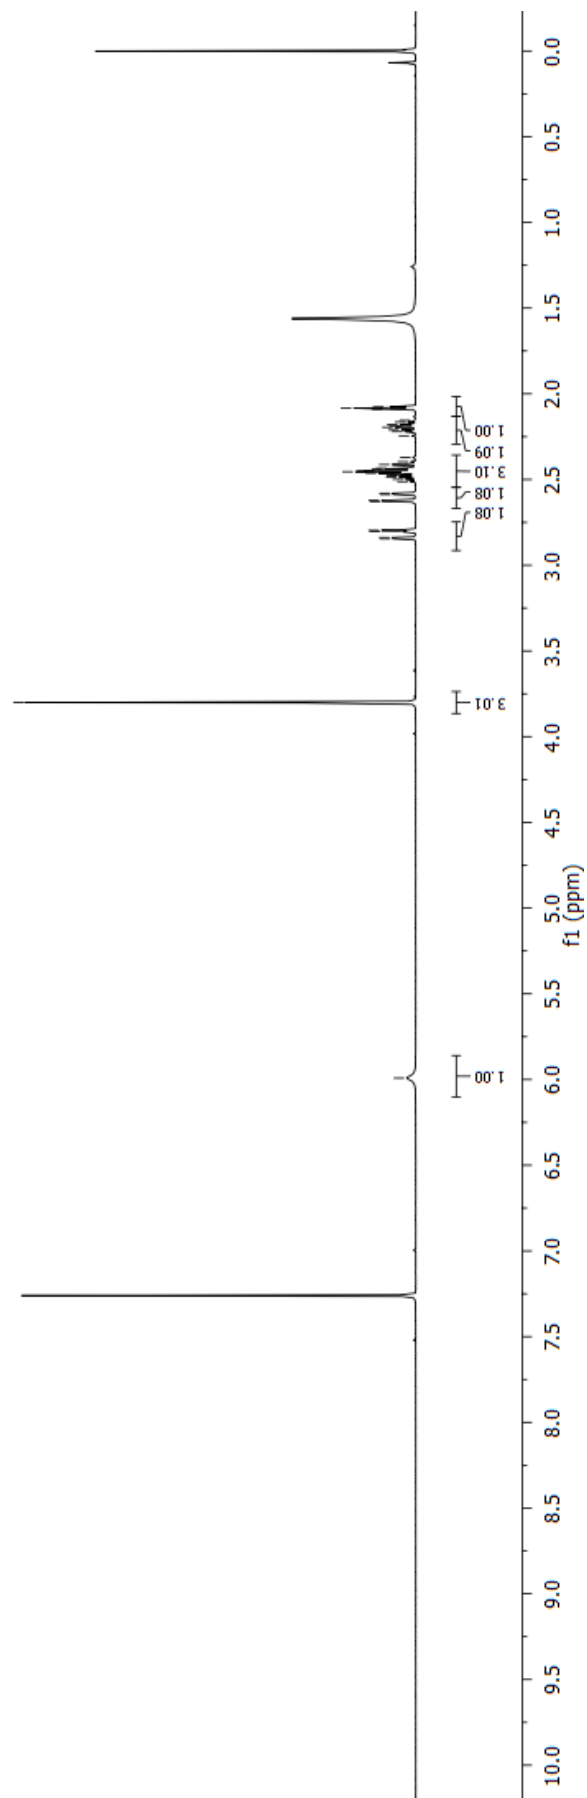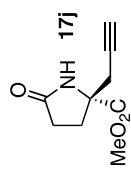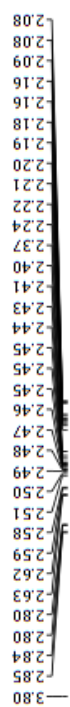

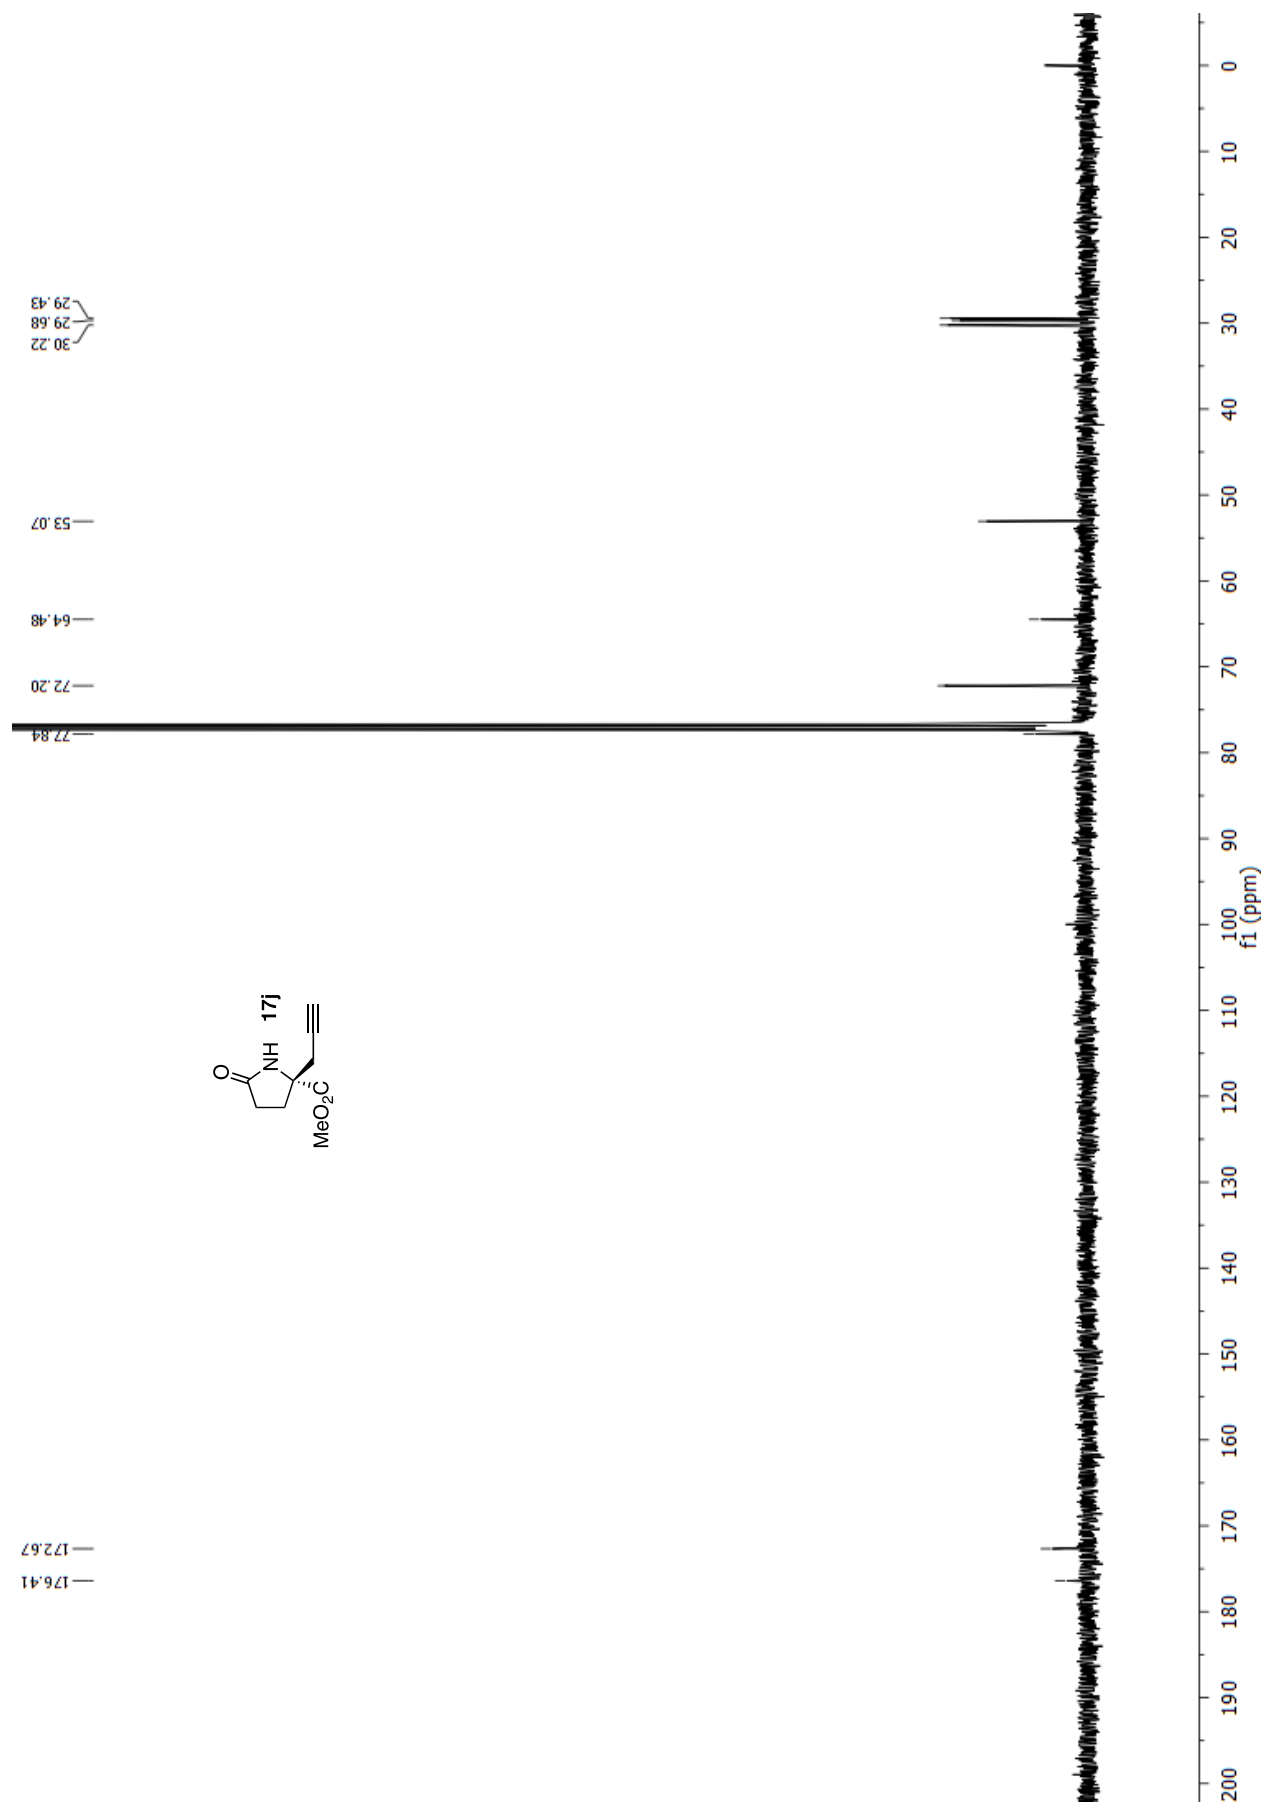

3.94  
3.82

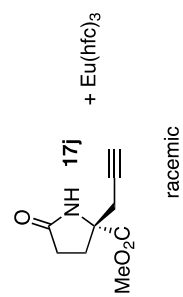

1.00  
0.97

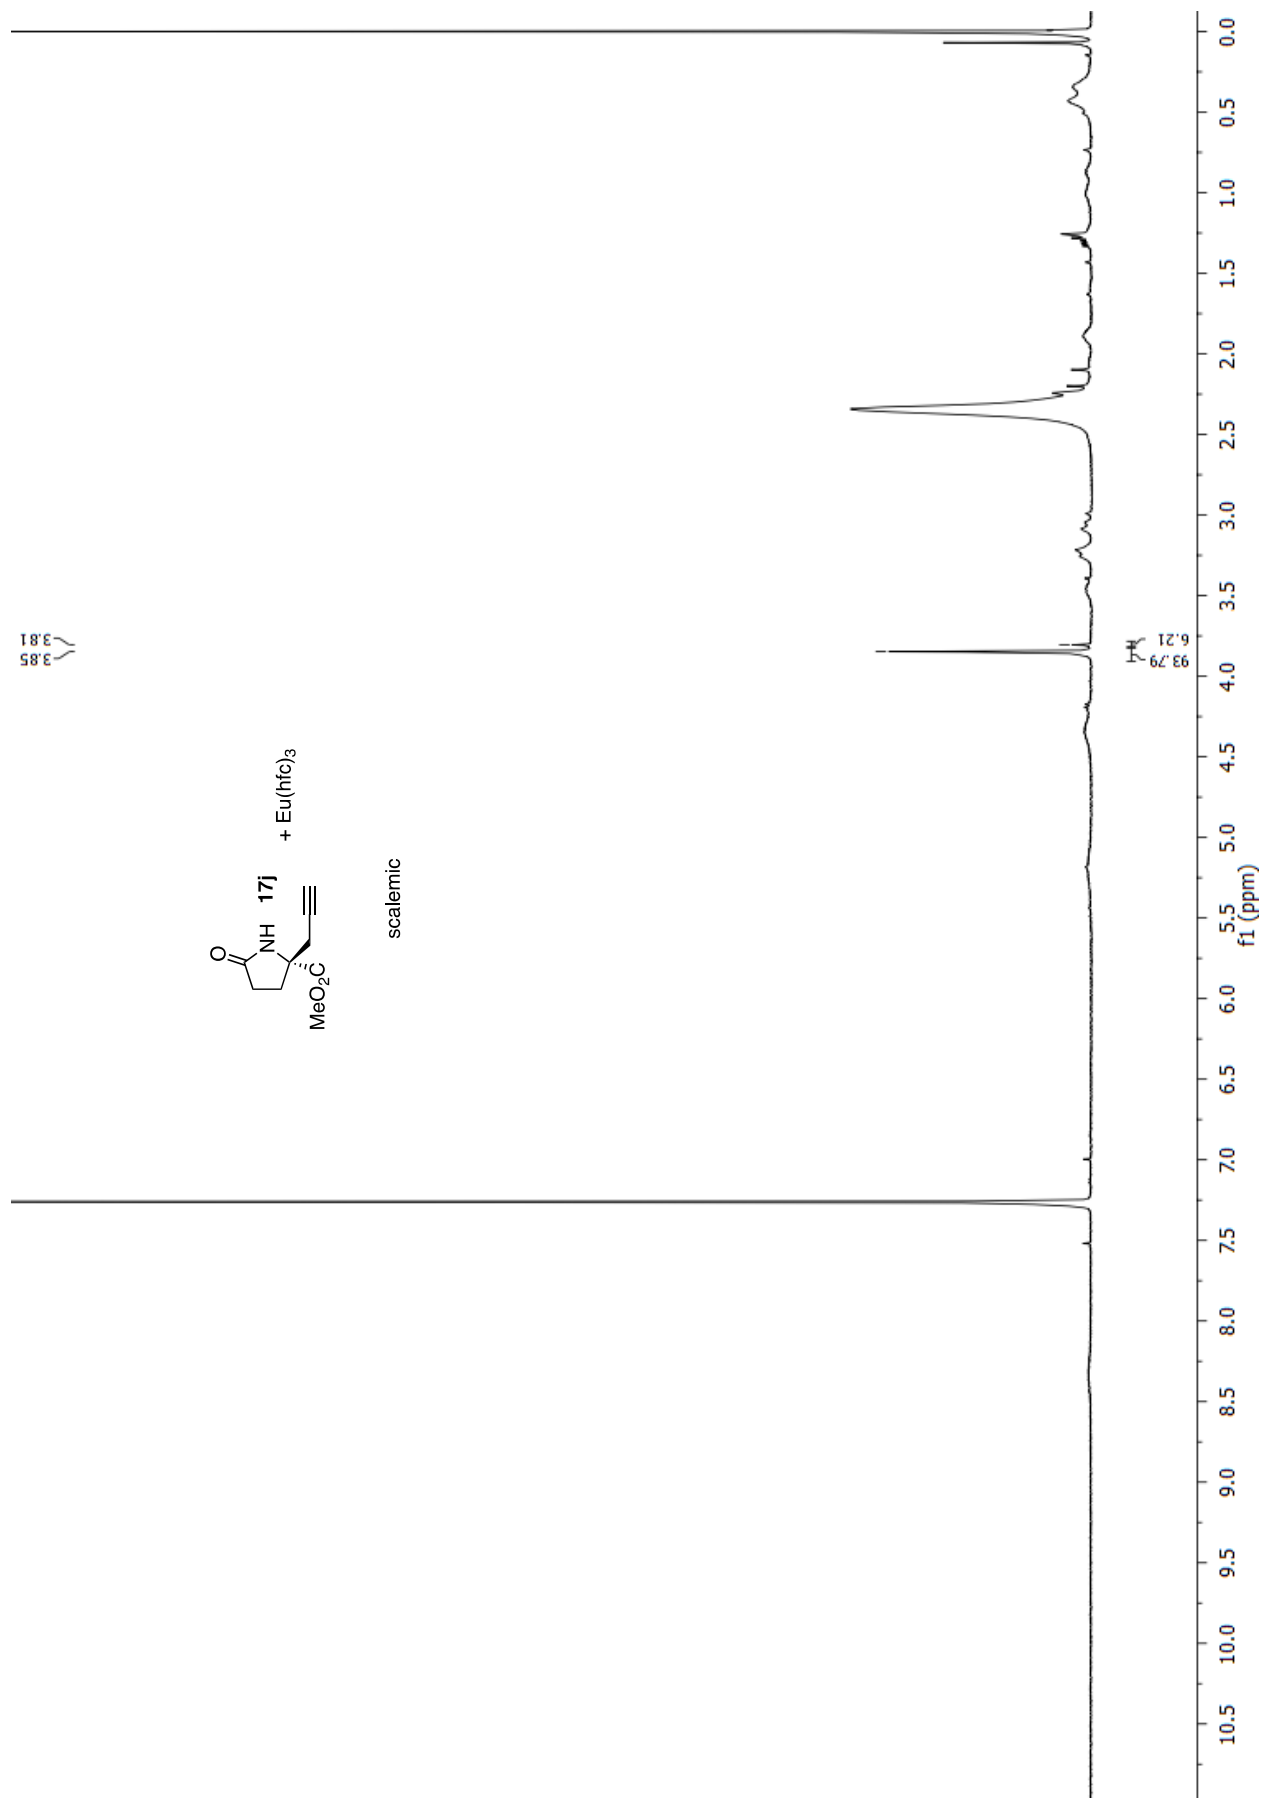



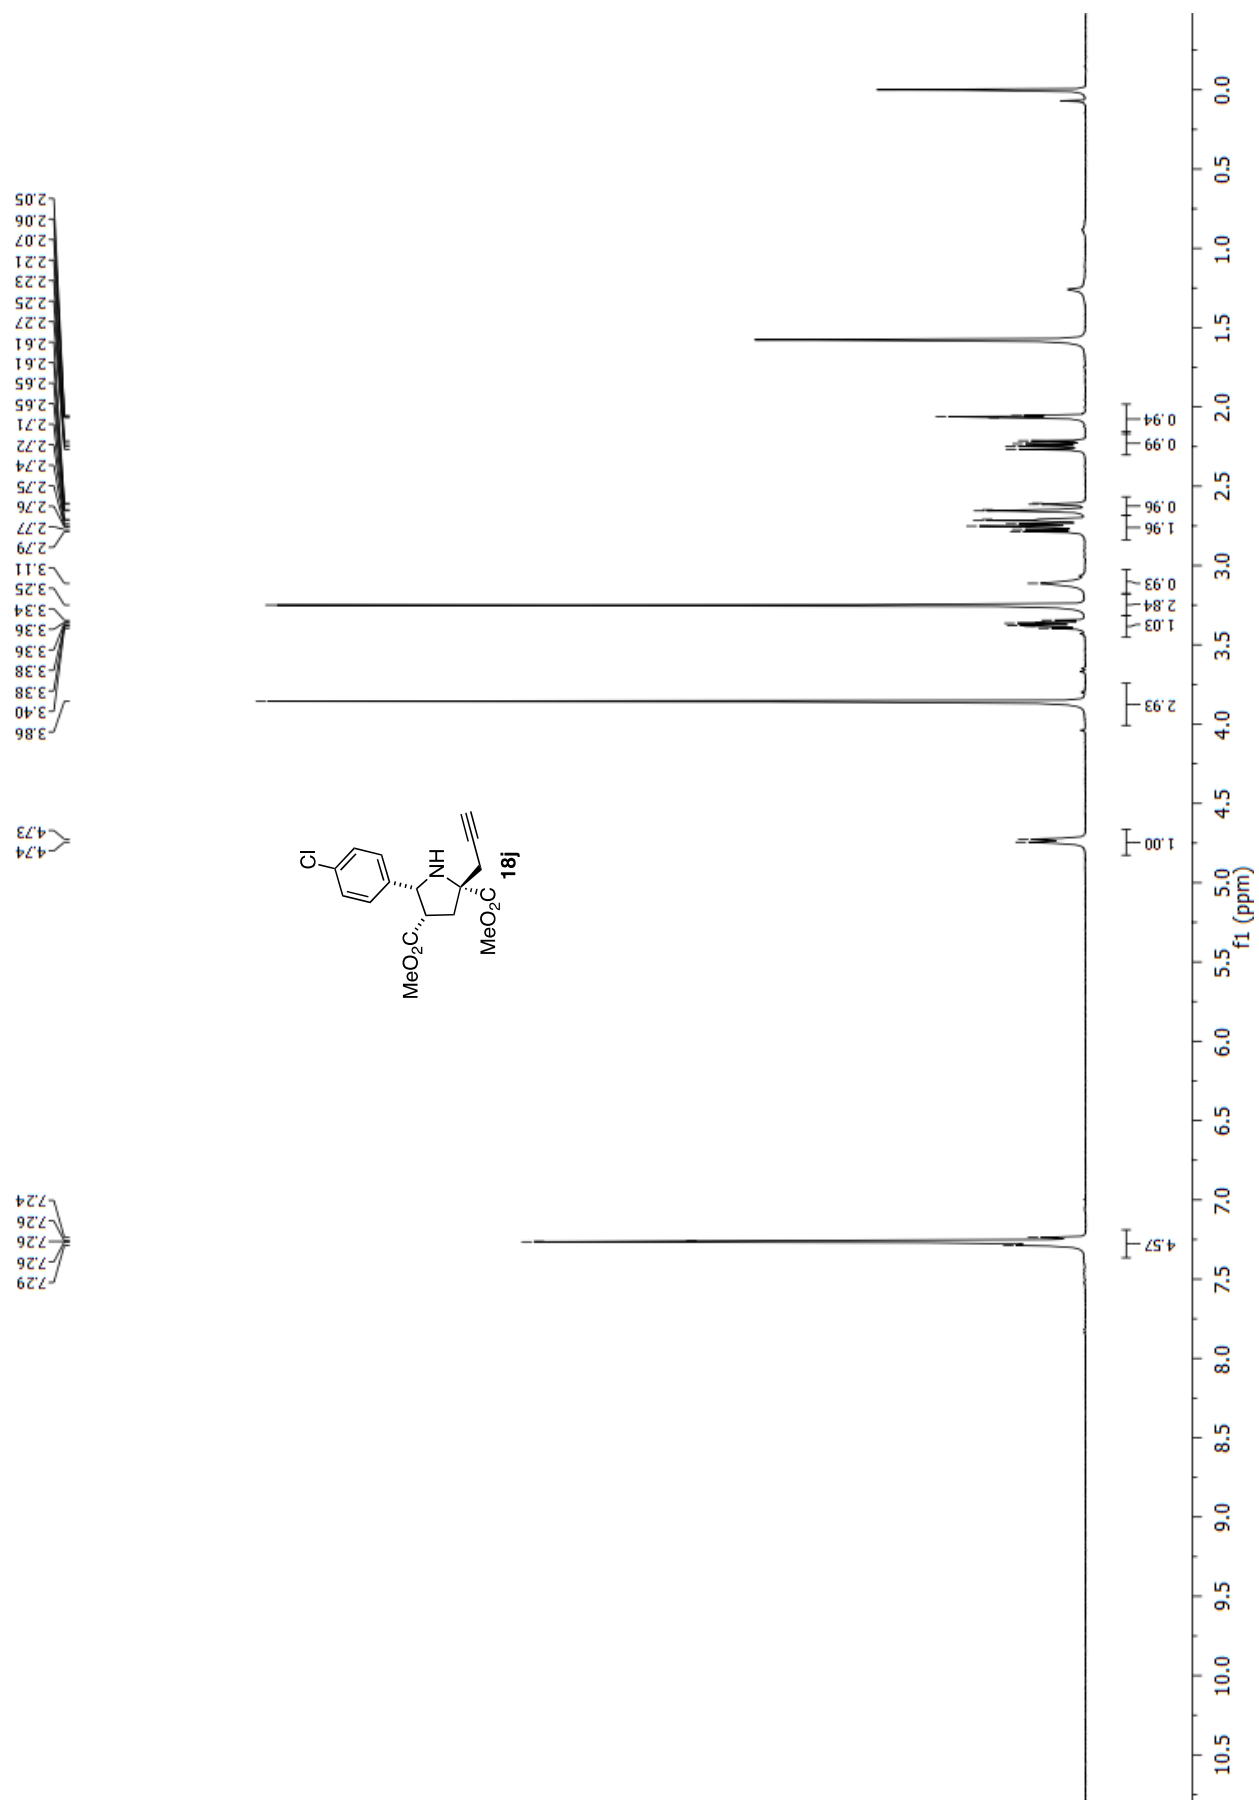

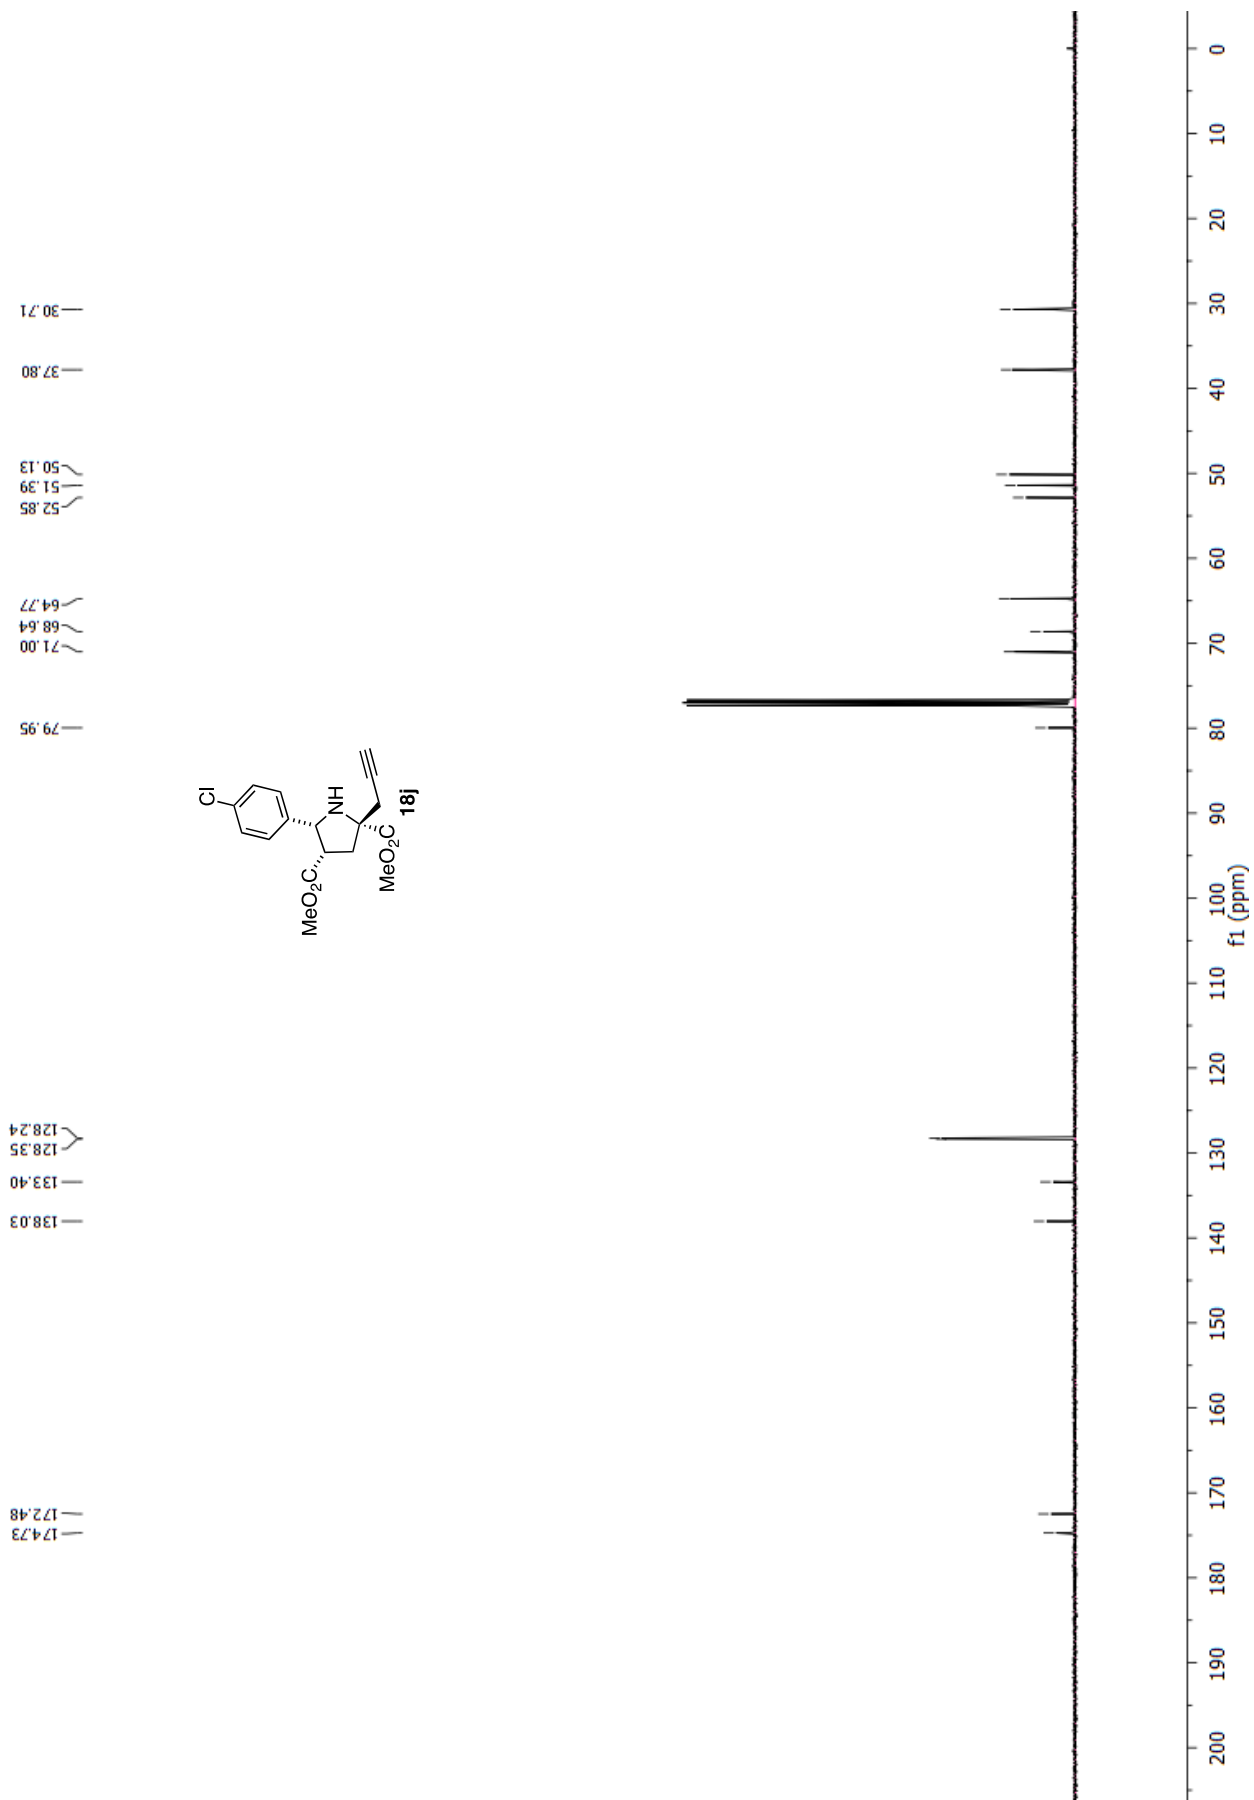

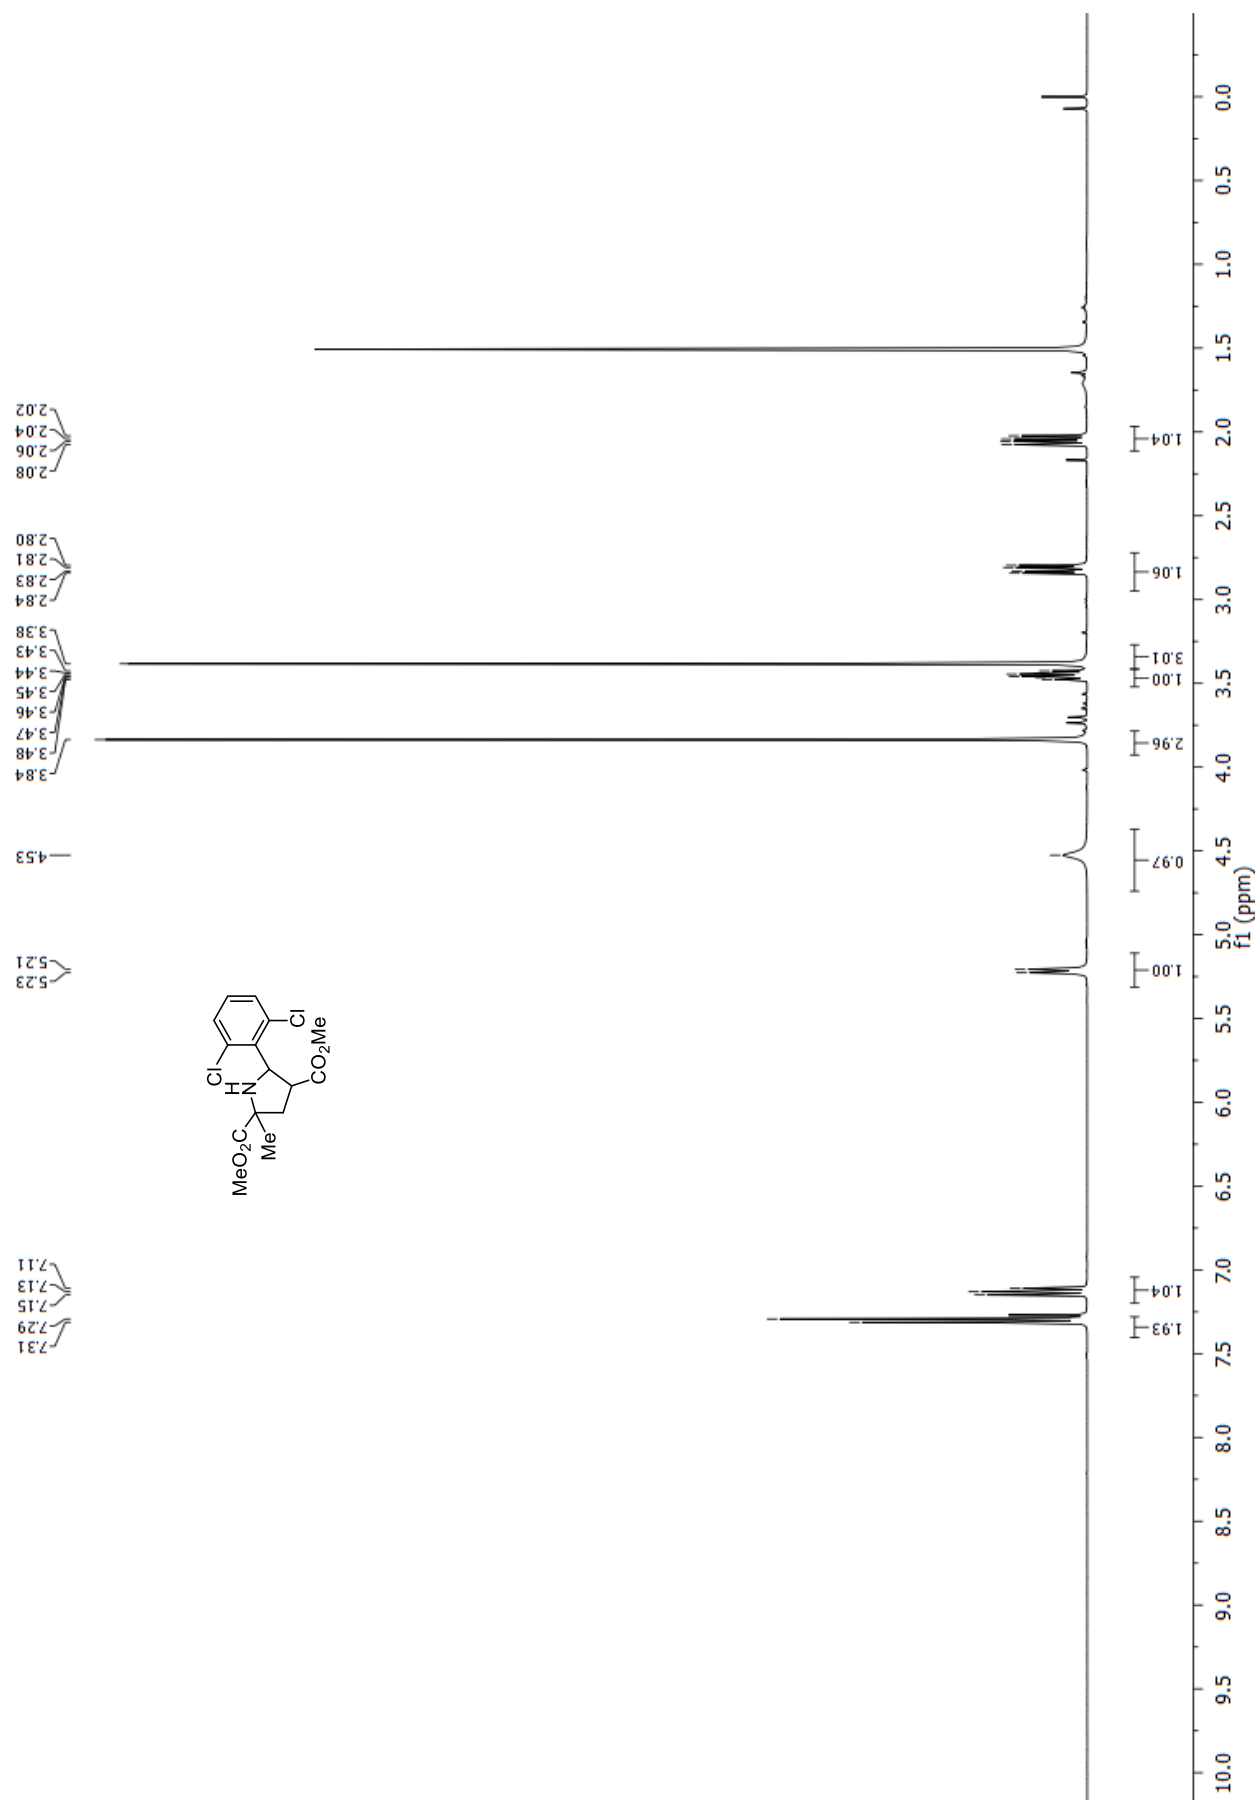

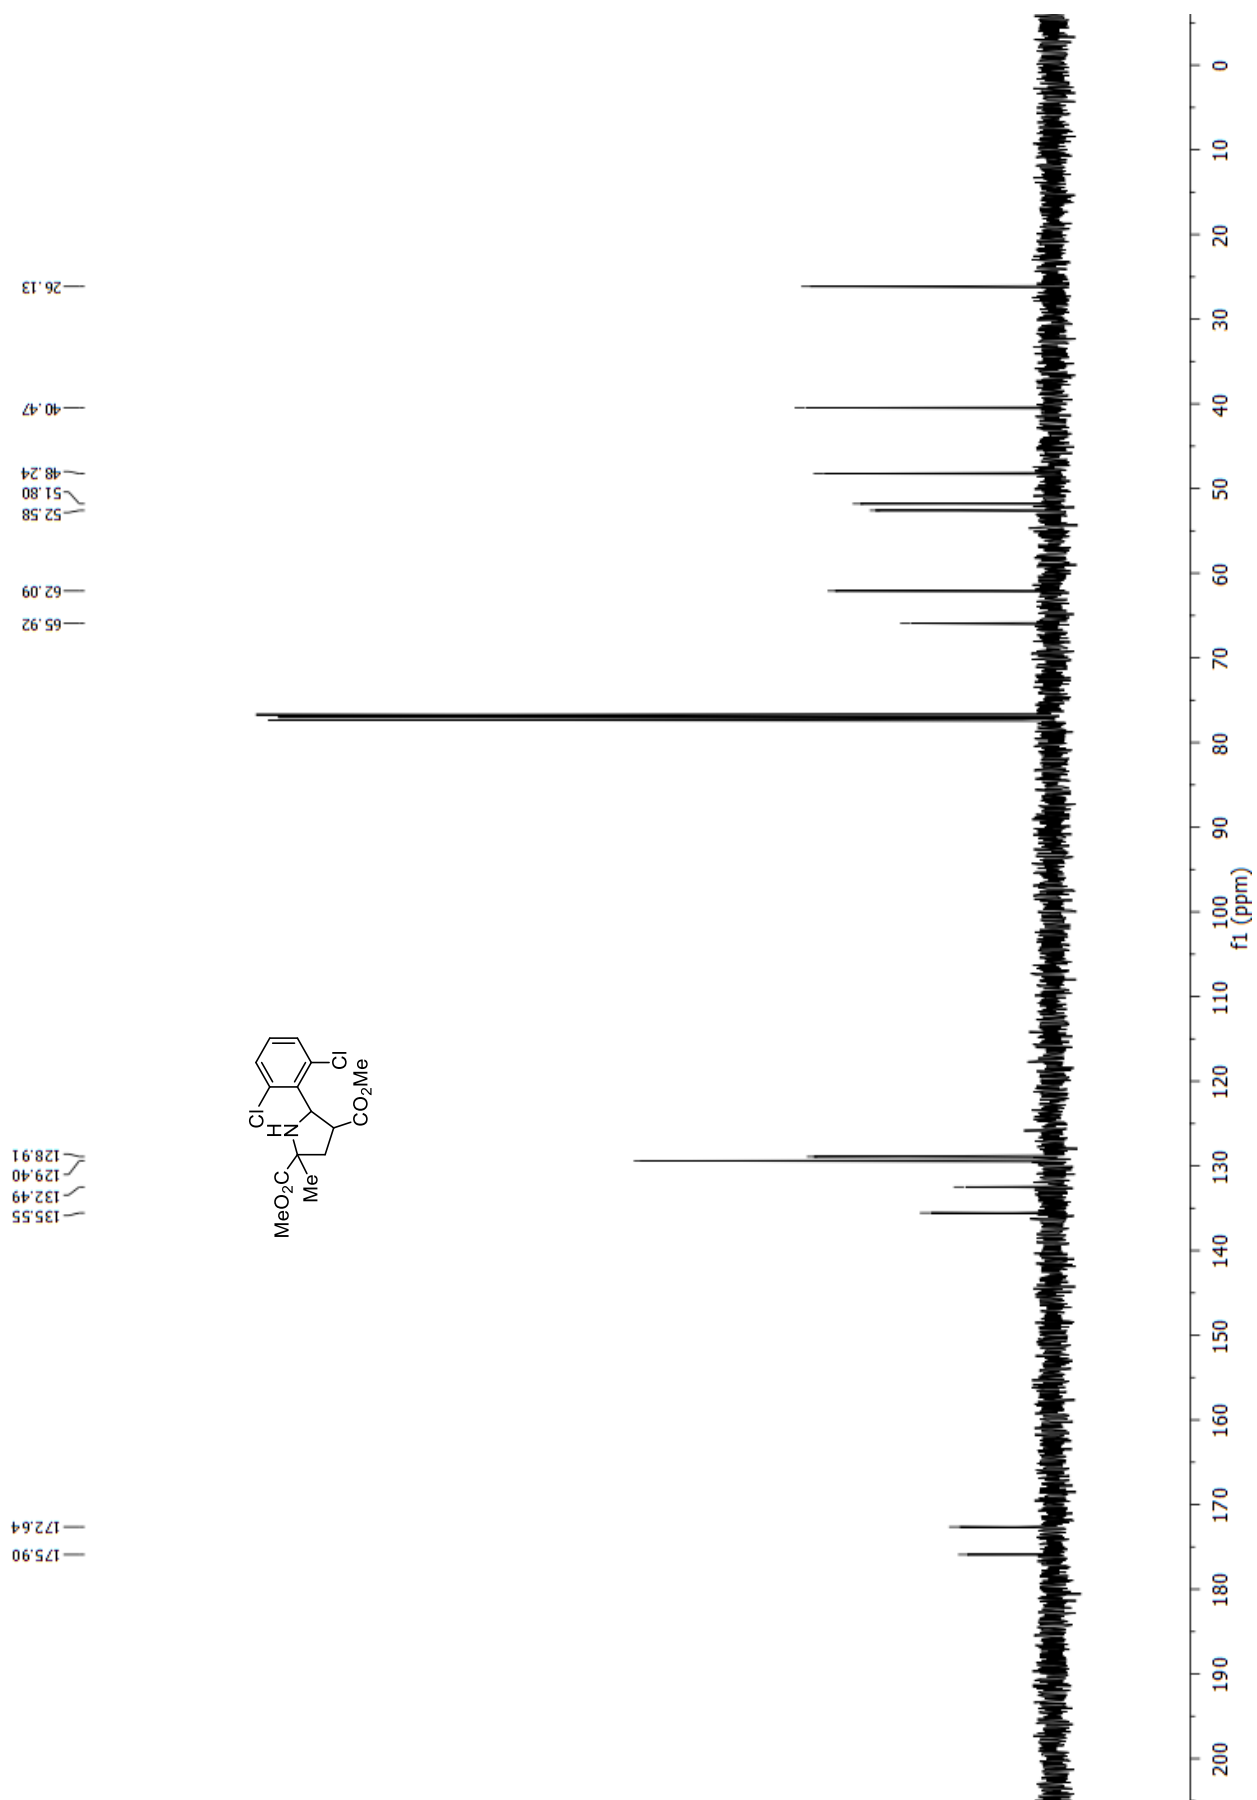

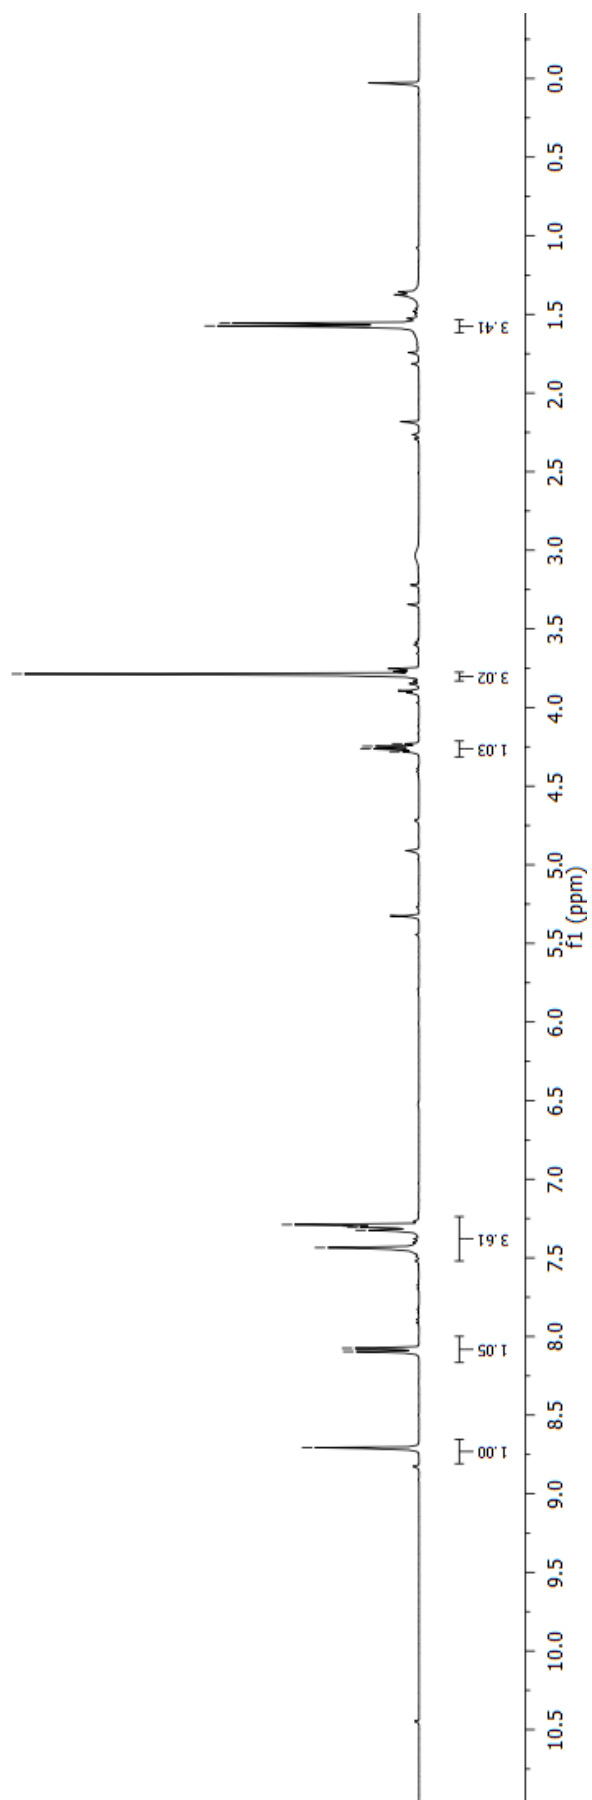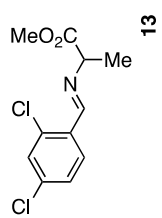

1.56  
1.57

3.79  
4.23  
4.25  
4.26  
4.28

7.29  
7.30  
7.30  
7.32  
7.43  
7.43

8.07  
8.10

8.71

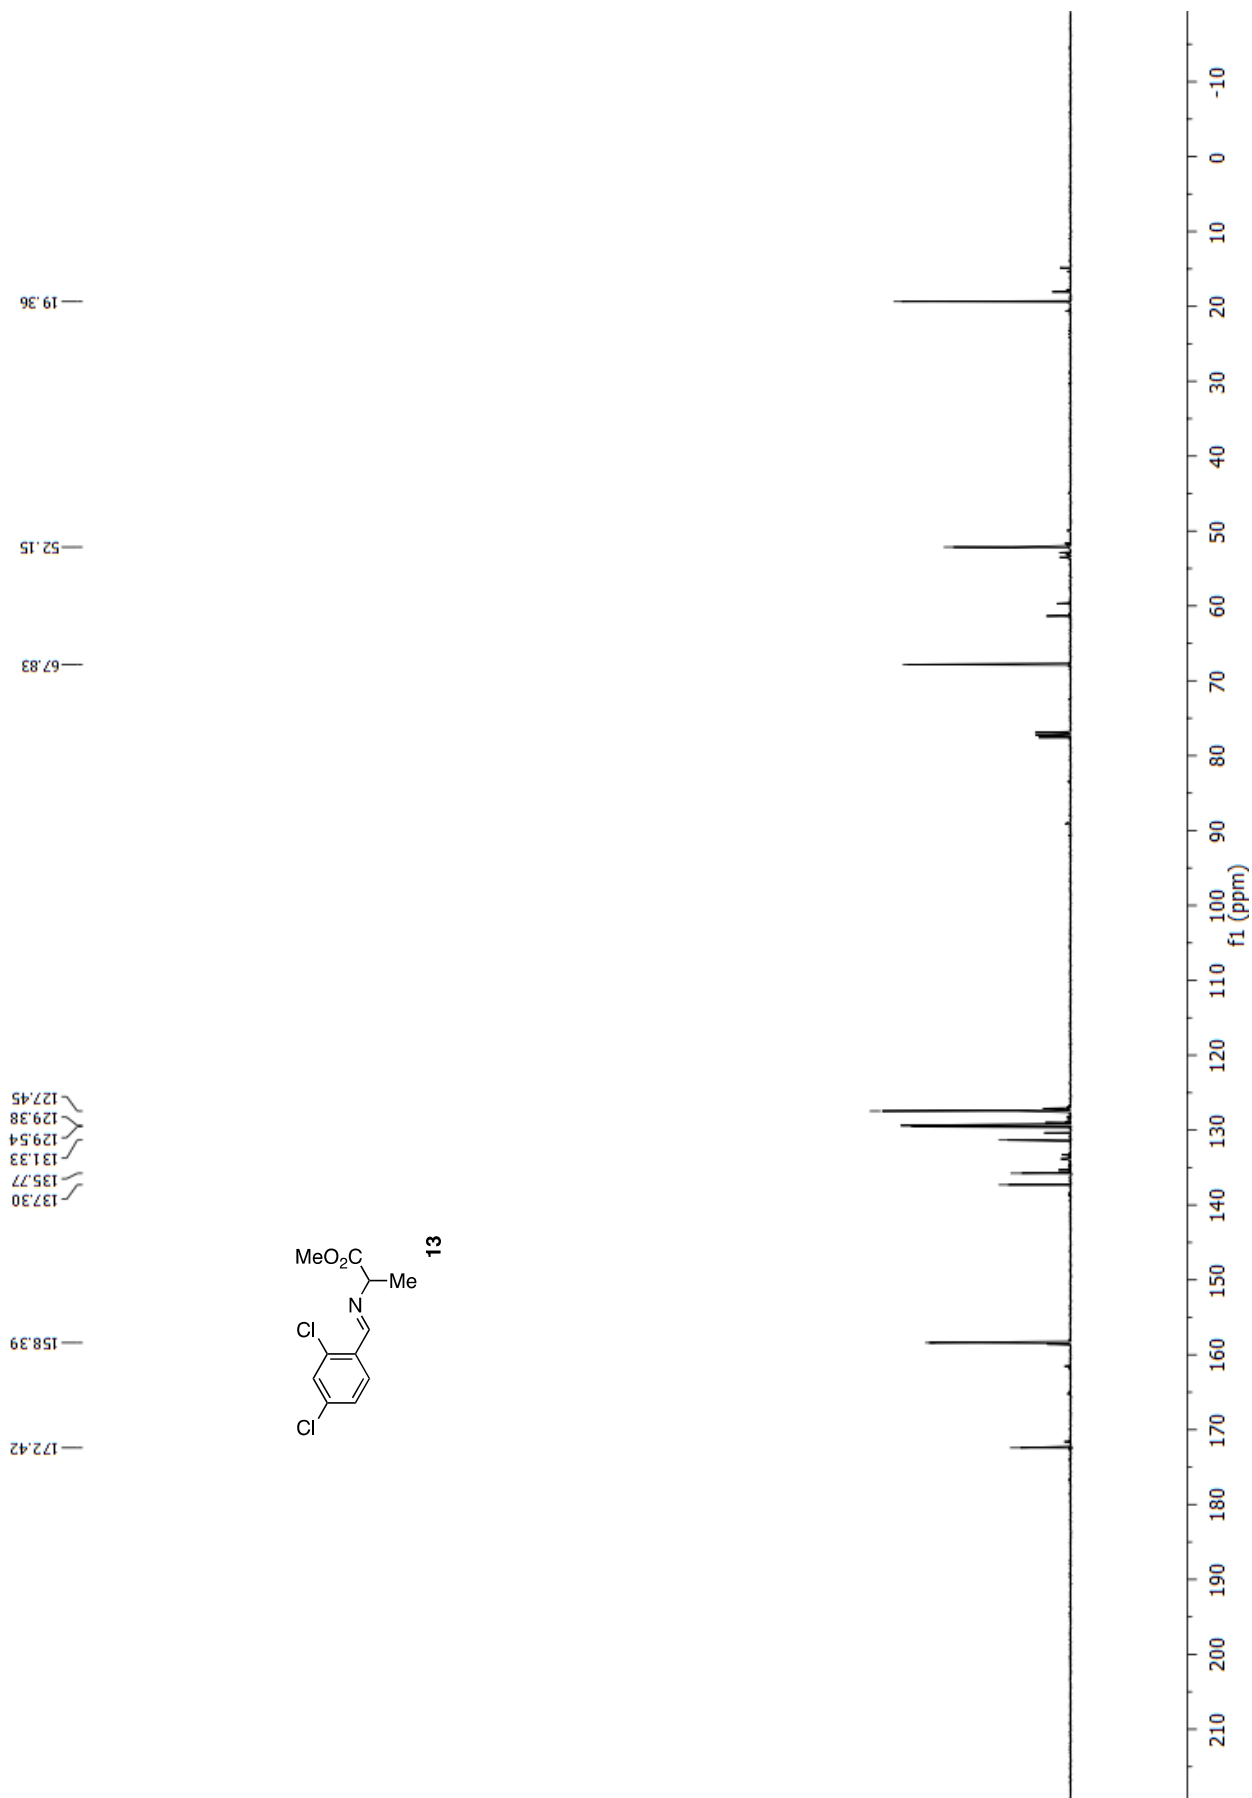

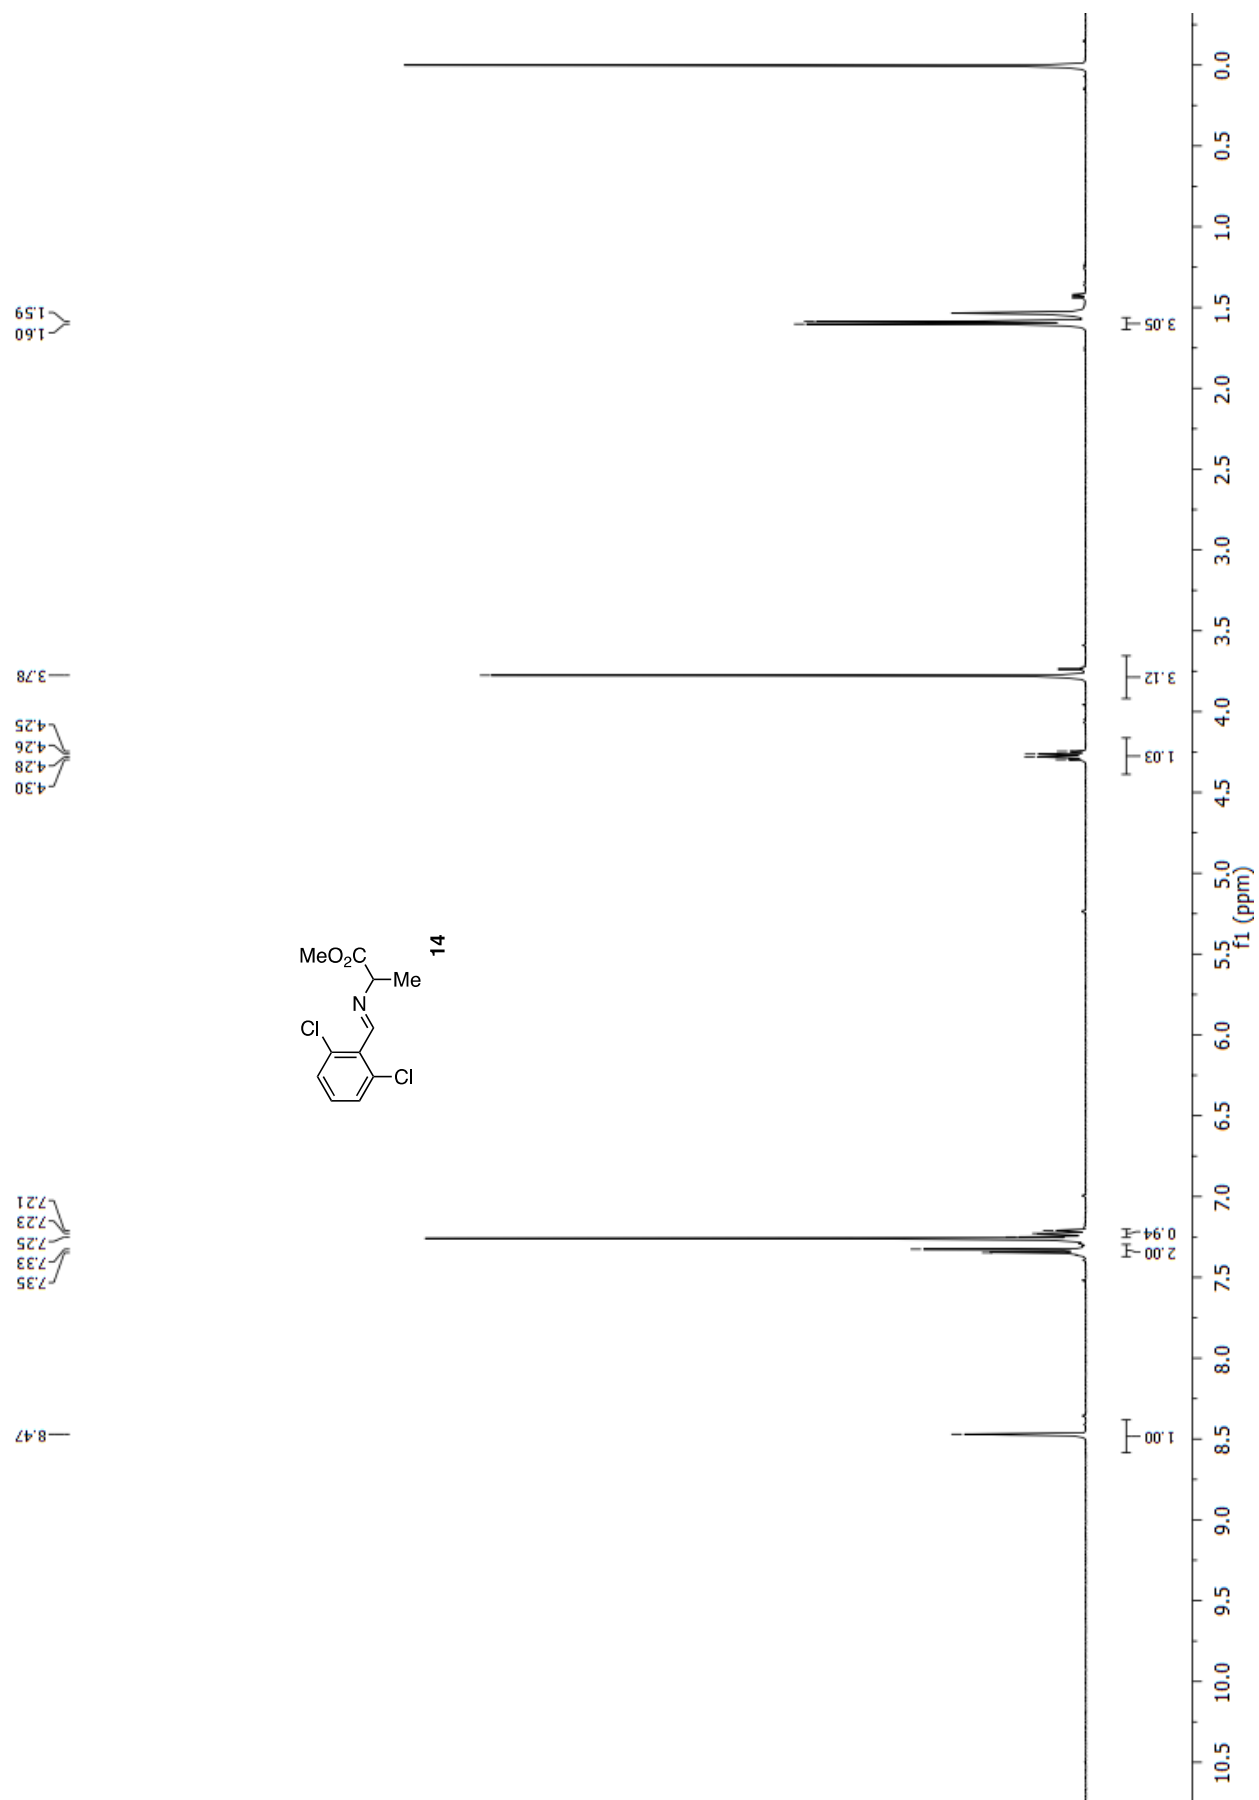

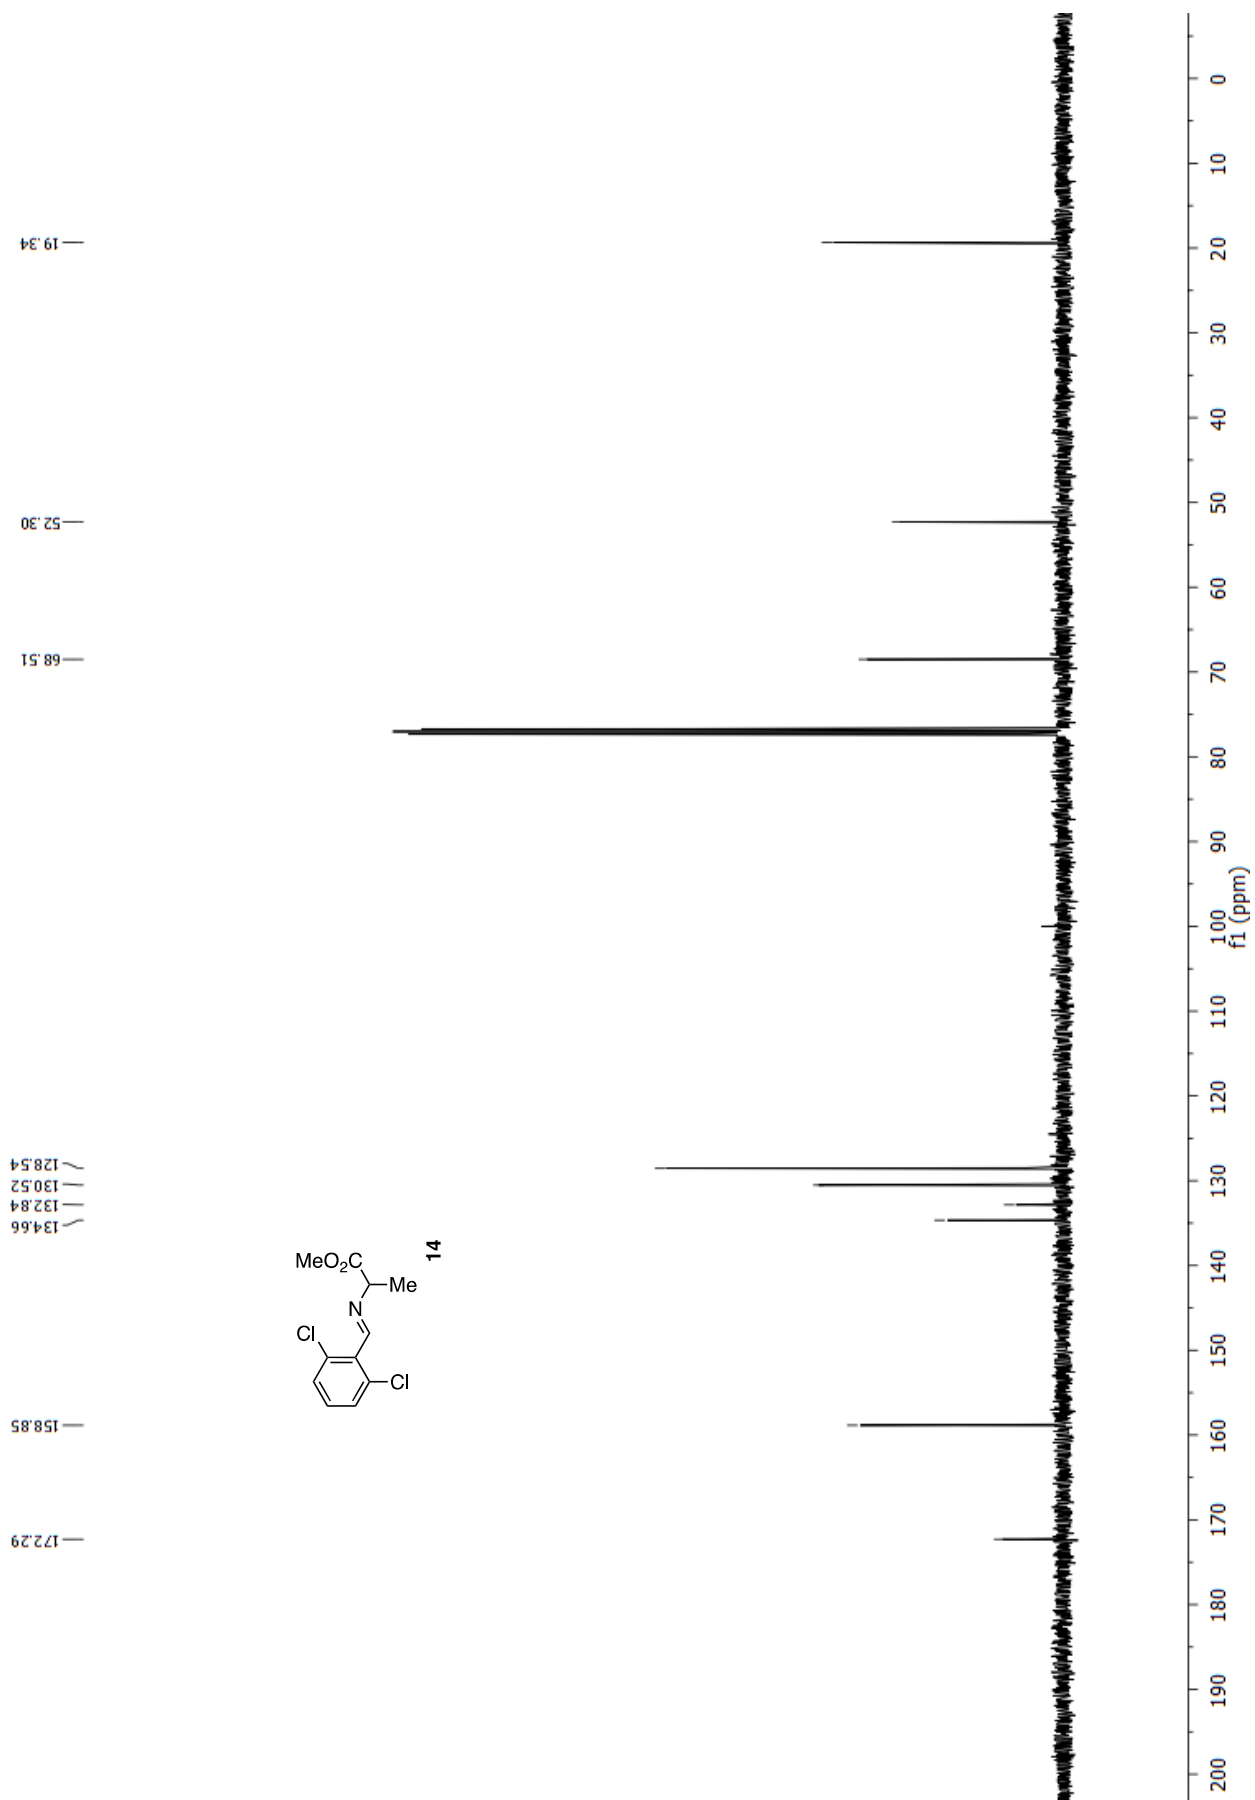



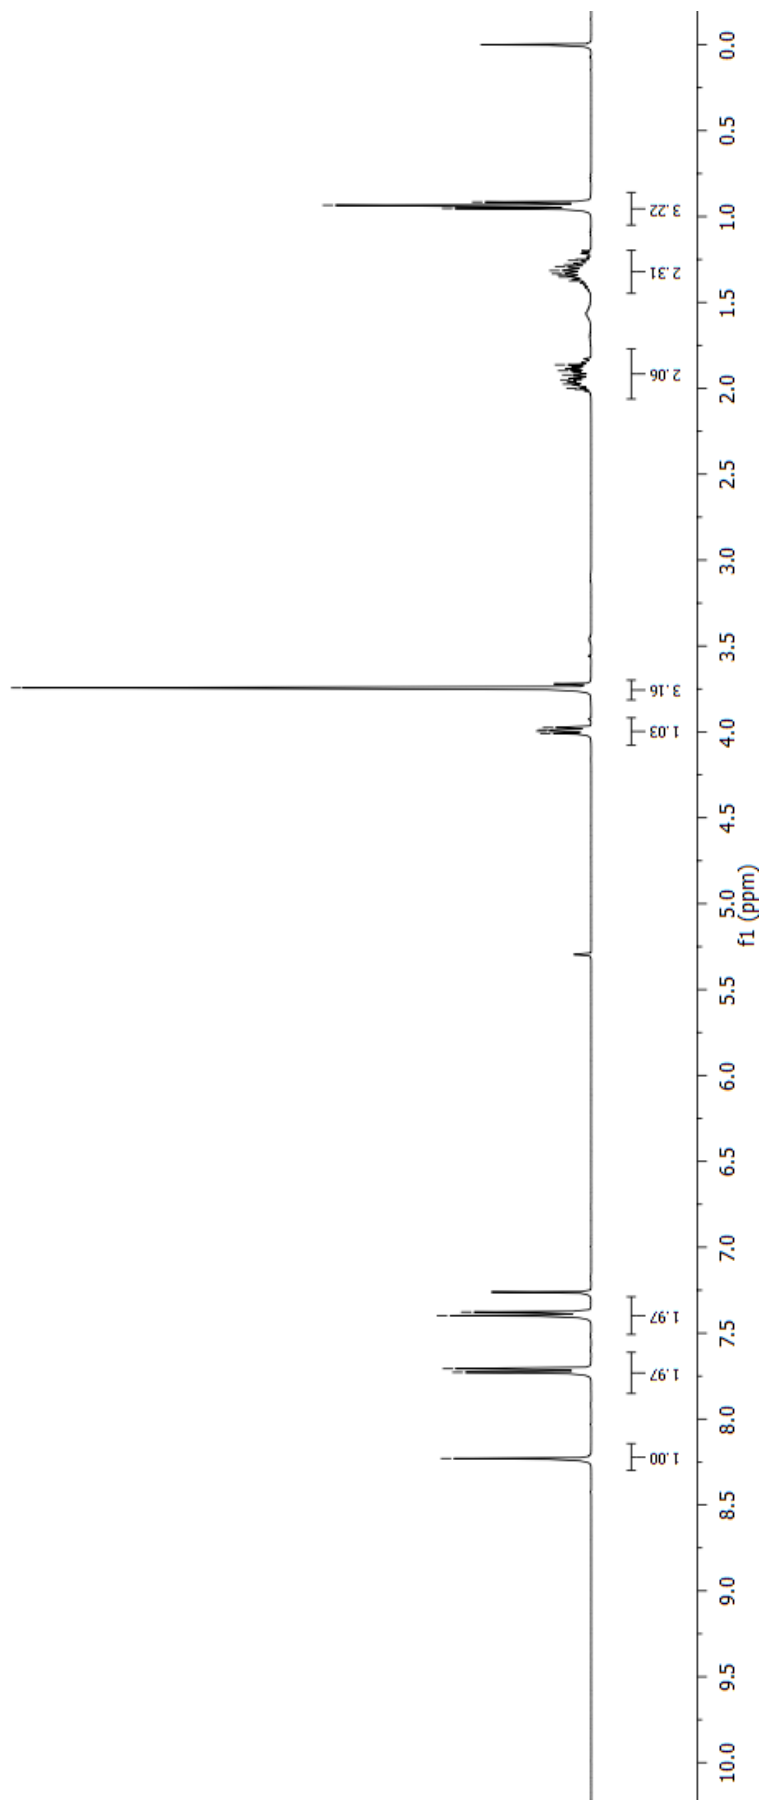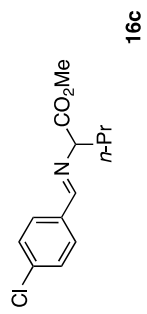

0.92  
0.93  
0.95  
1.25  
1.26  
1.28  
1.29  
1.31  
1.33  
1.34  
1.35  
1.37  
1.86  
1.90  
1.92  
1.95  
1.98  
2.00  
2.01

3.74  
3.97  
3.99  
4.00  
4.01

7.38  
7.40  
7.71  
7.73  
8.23

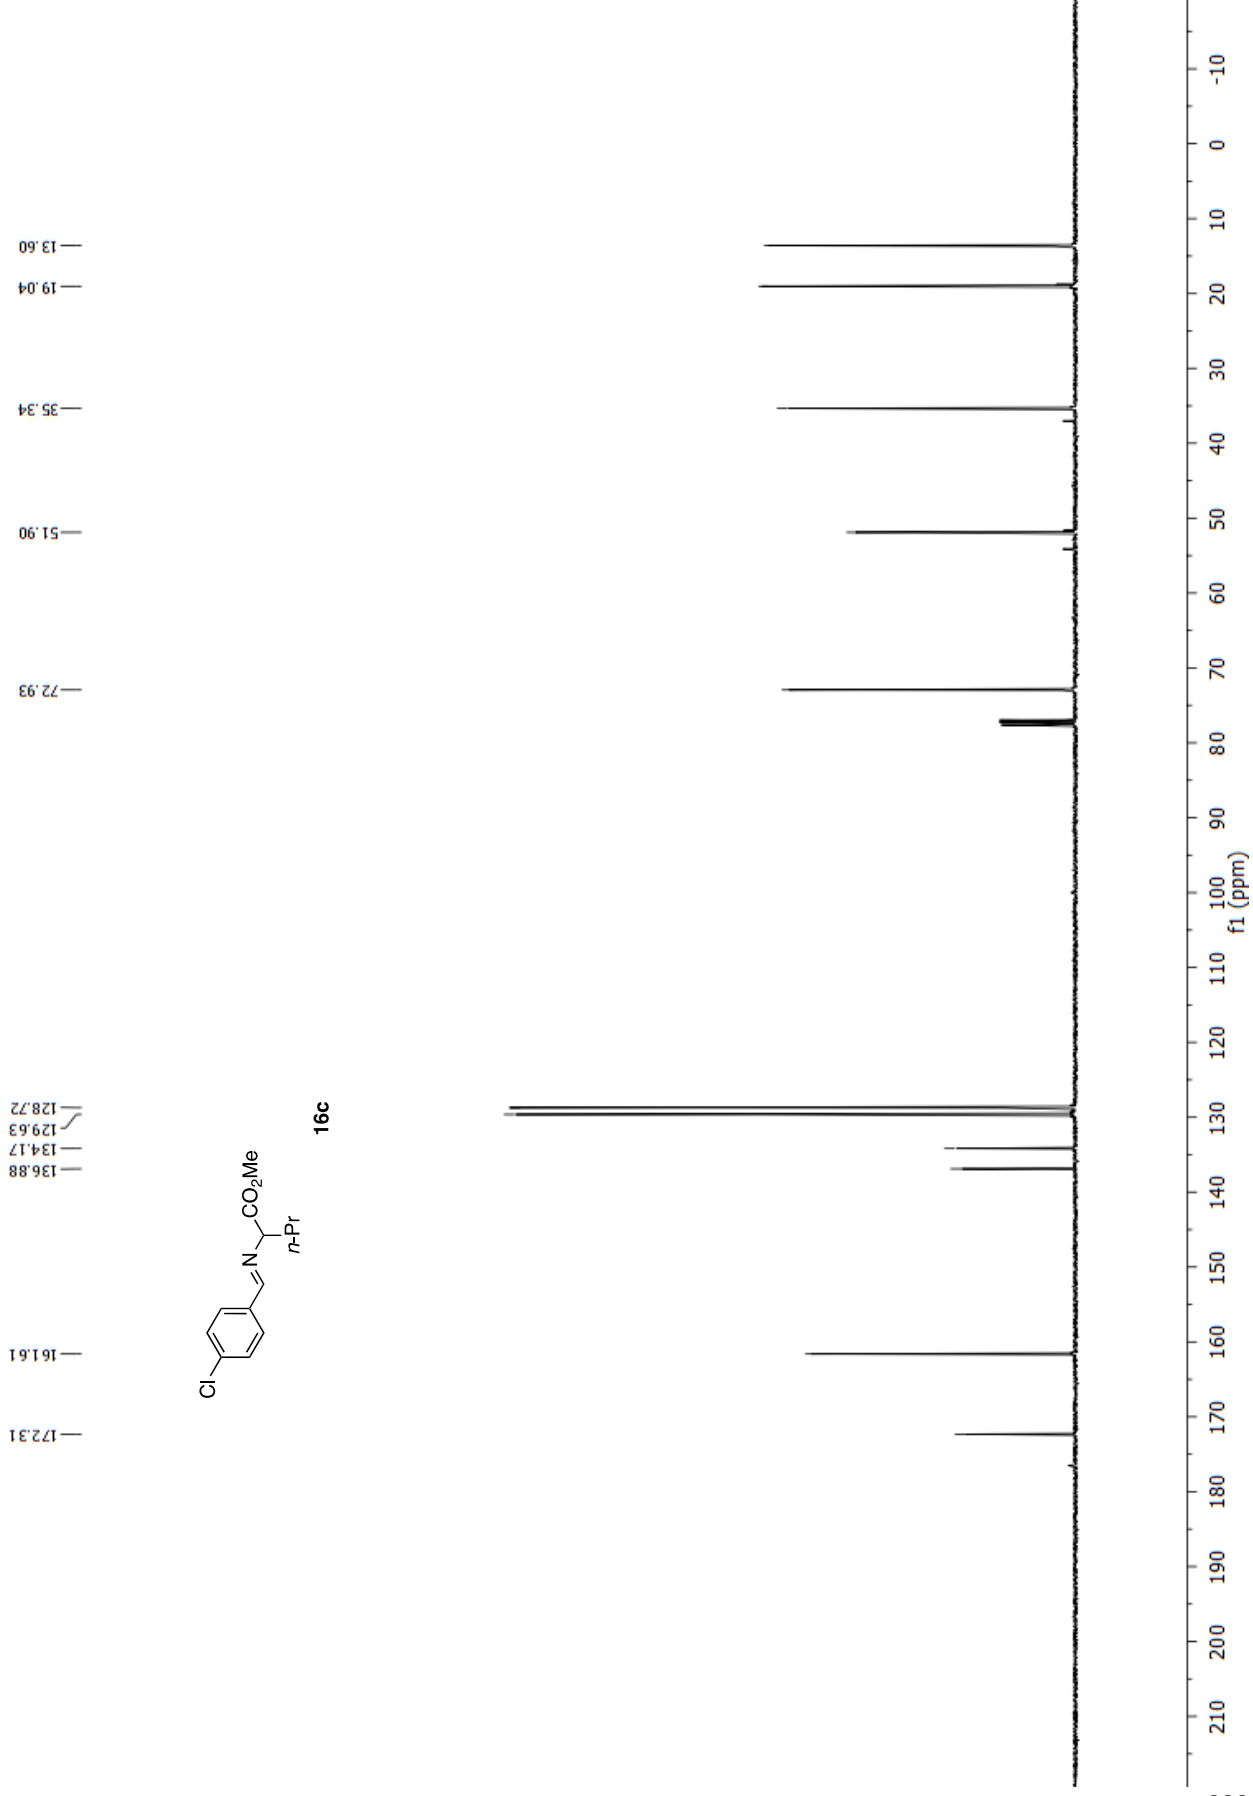

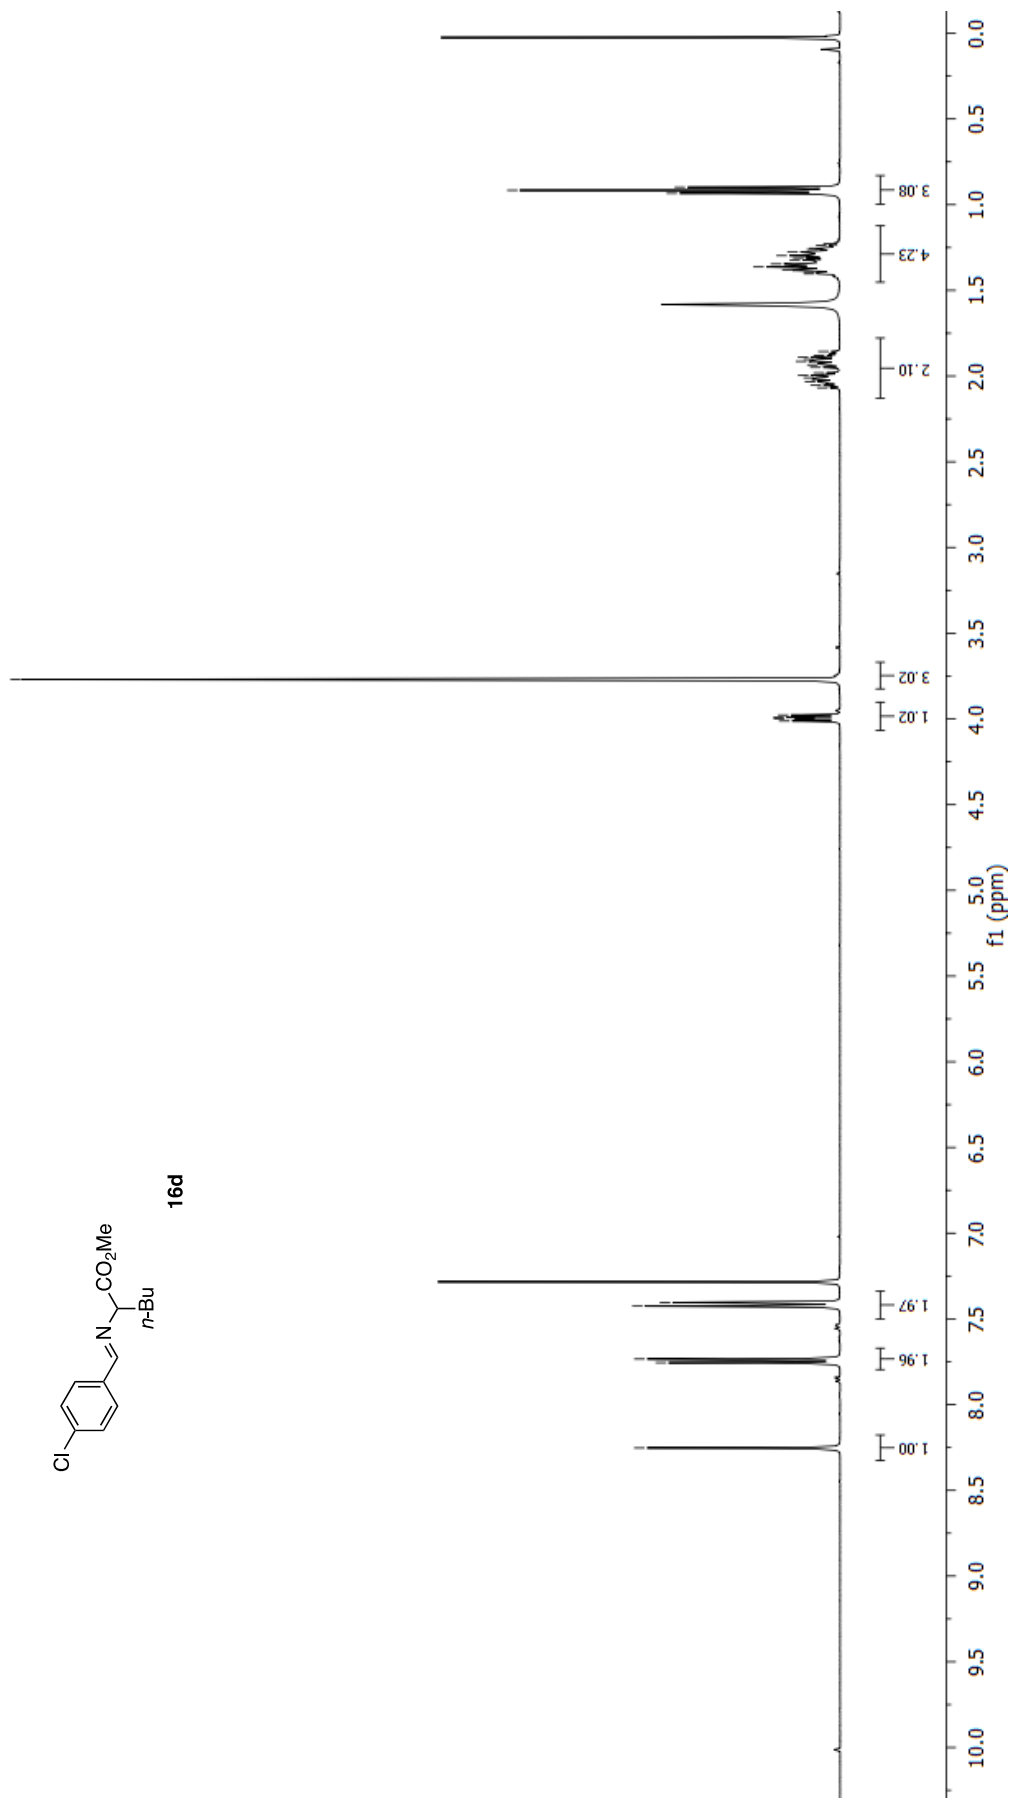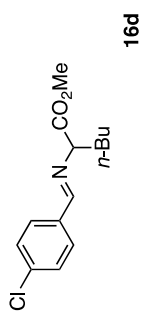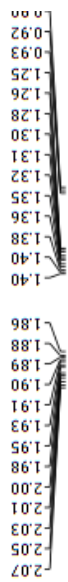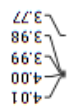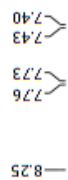

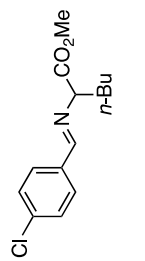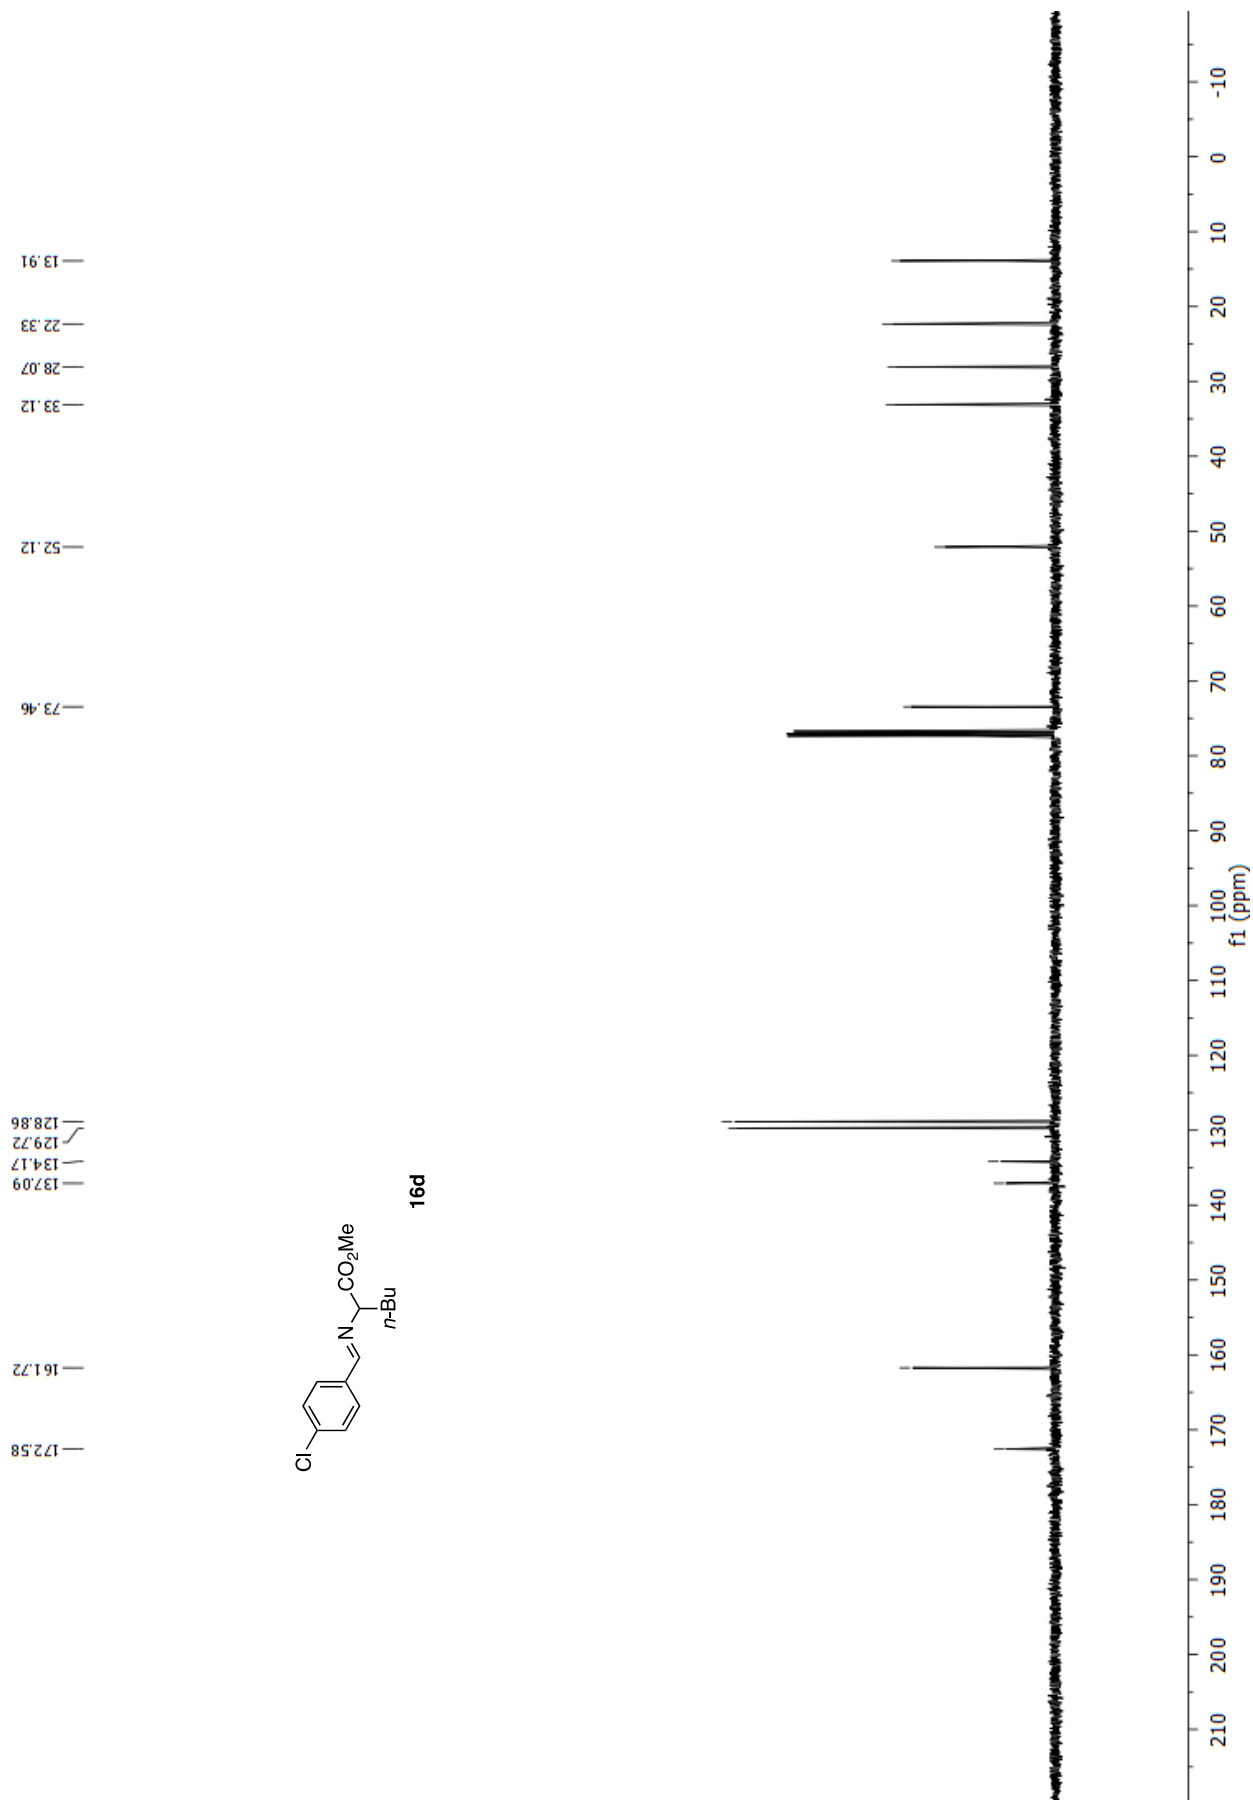

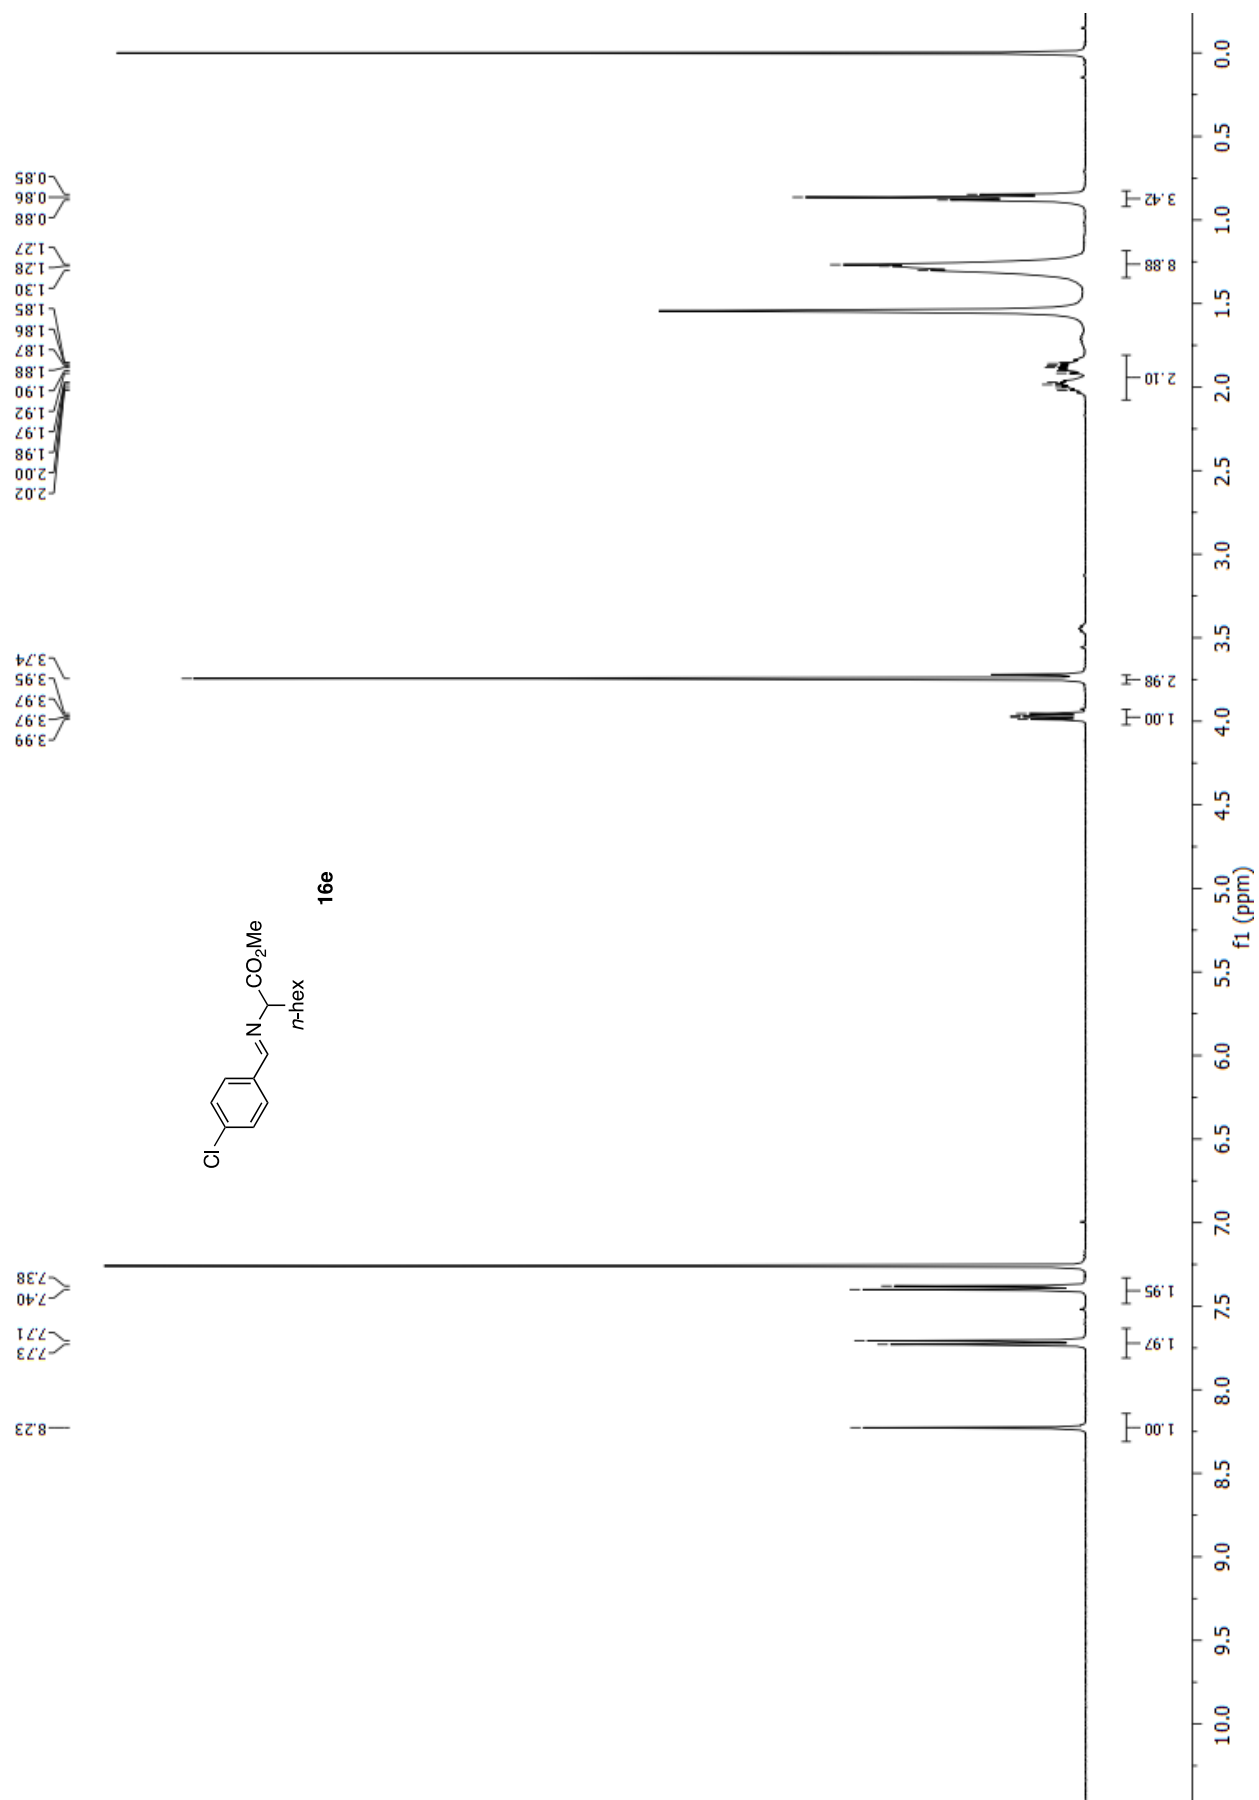

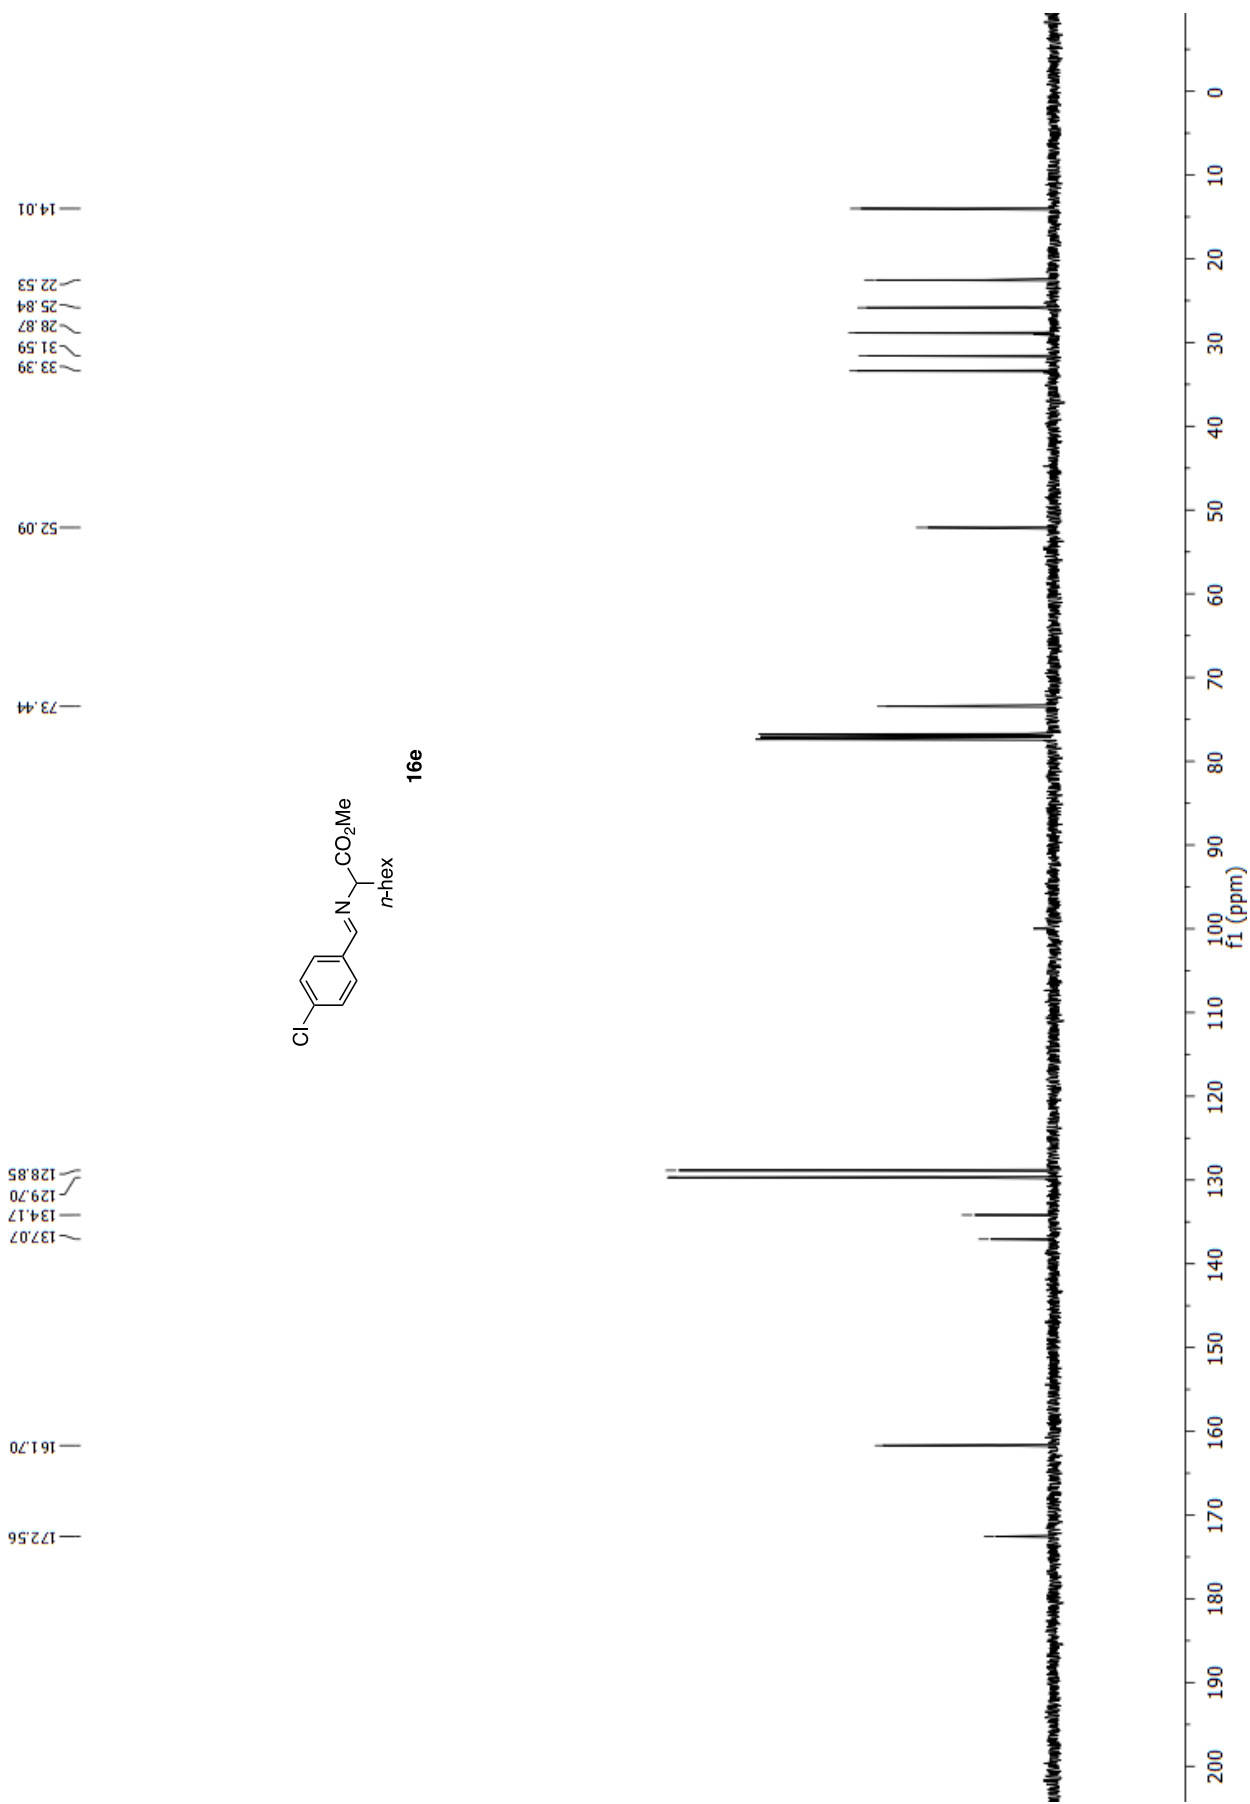

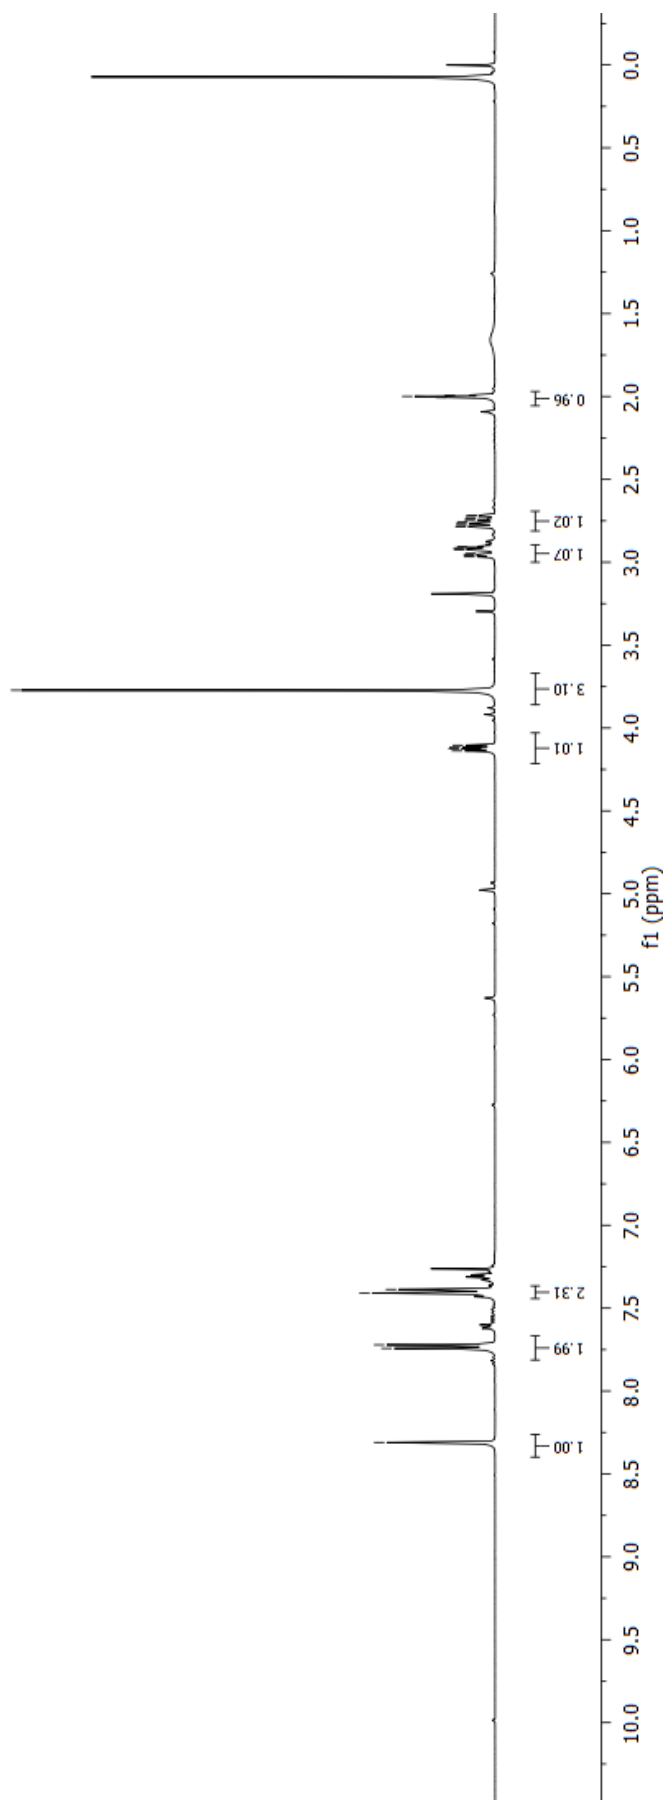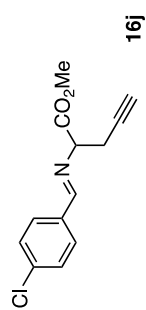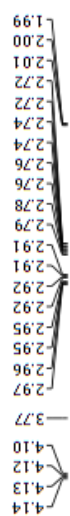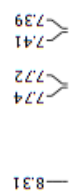

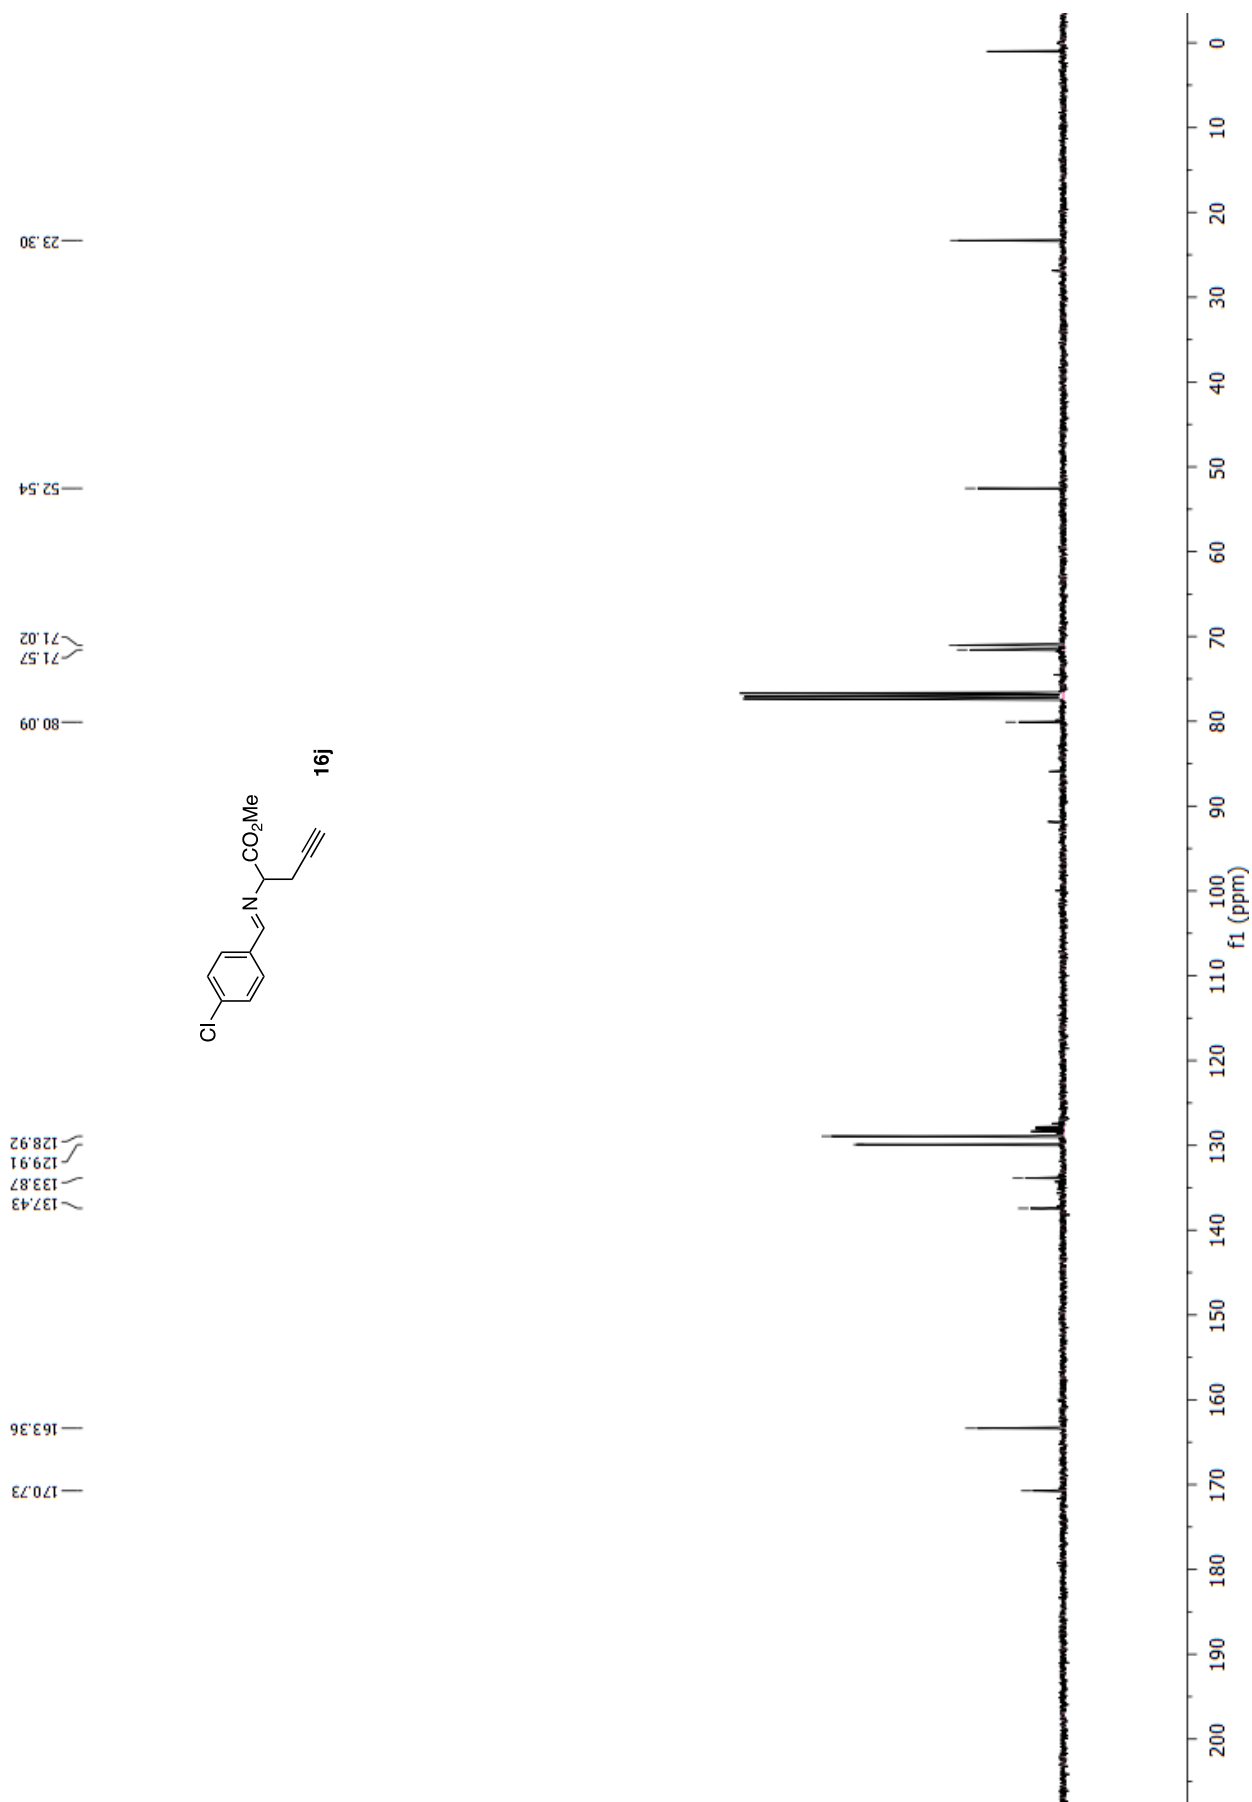



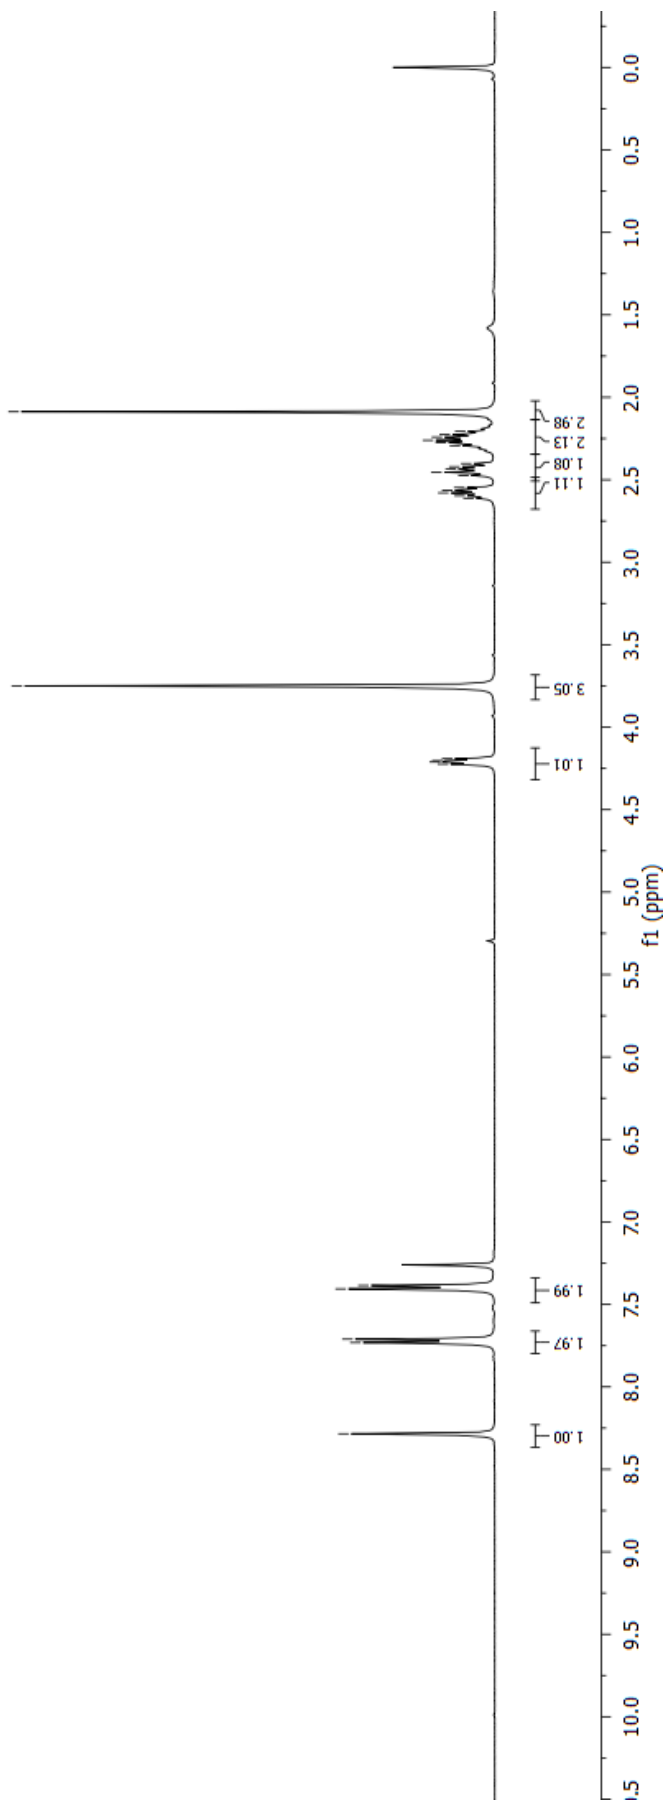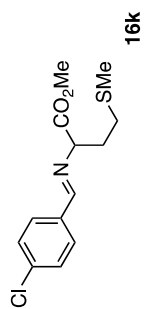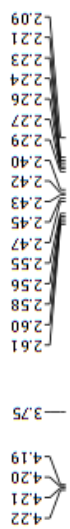

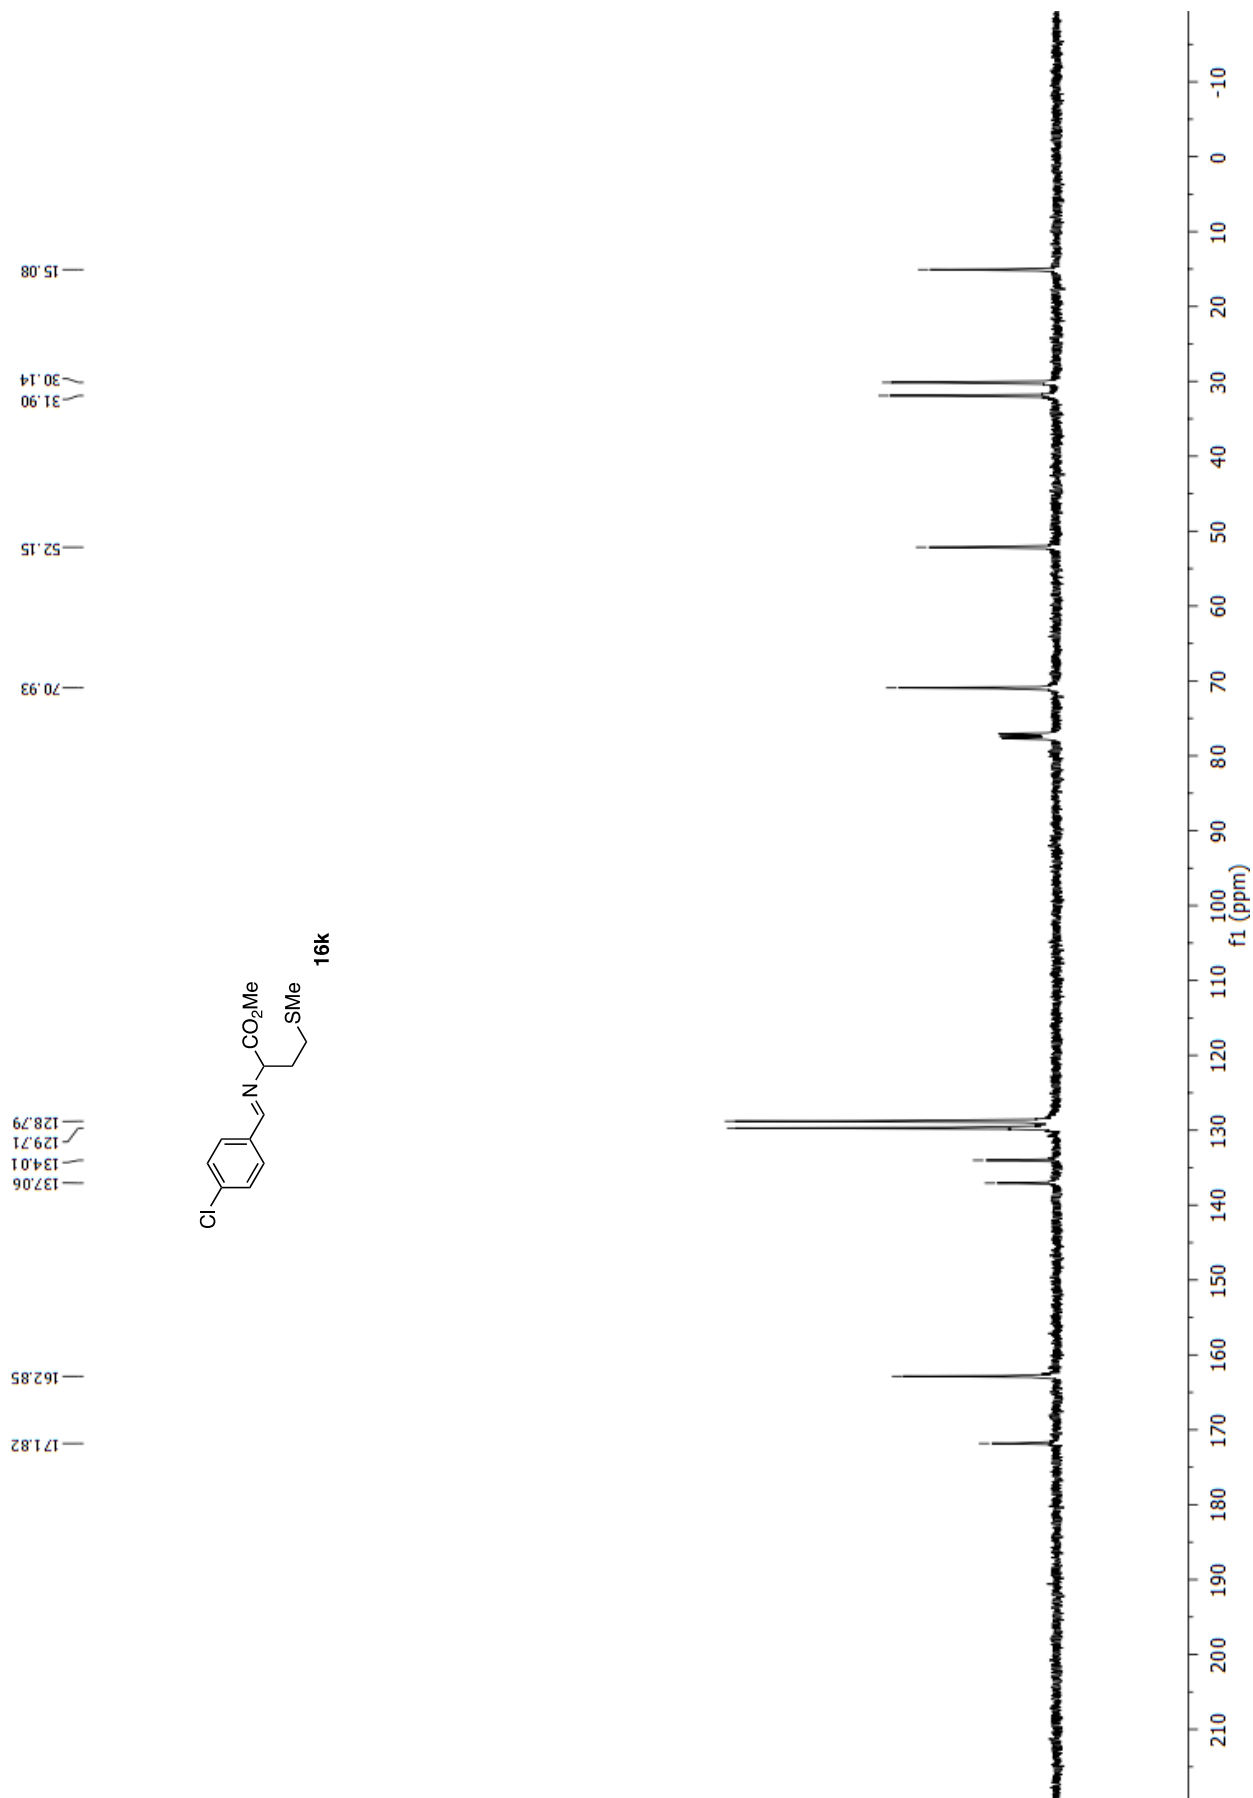

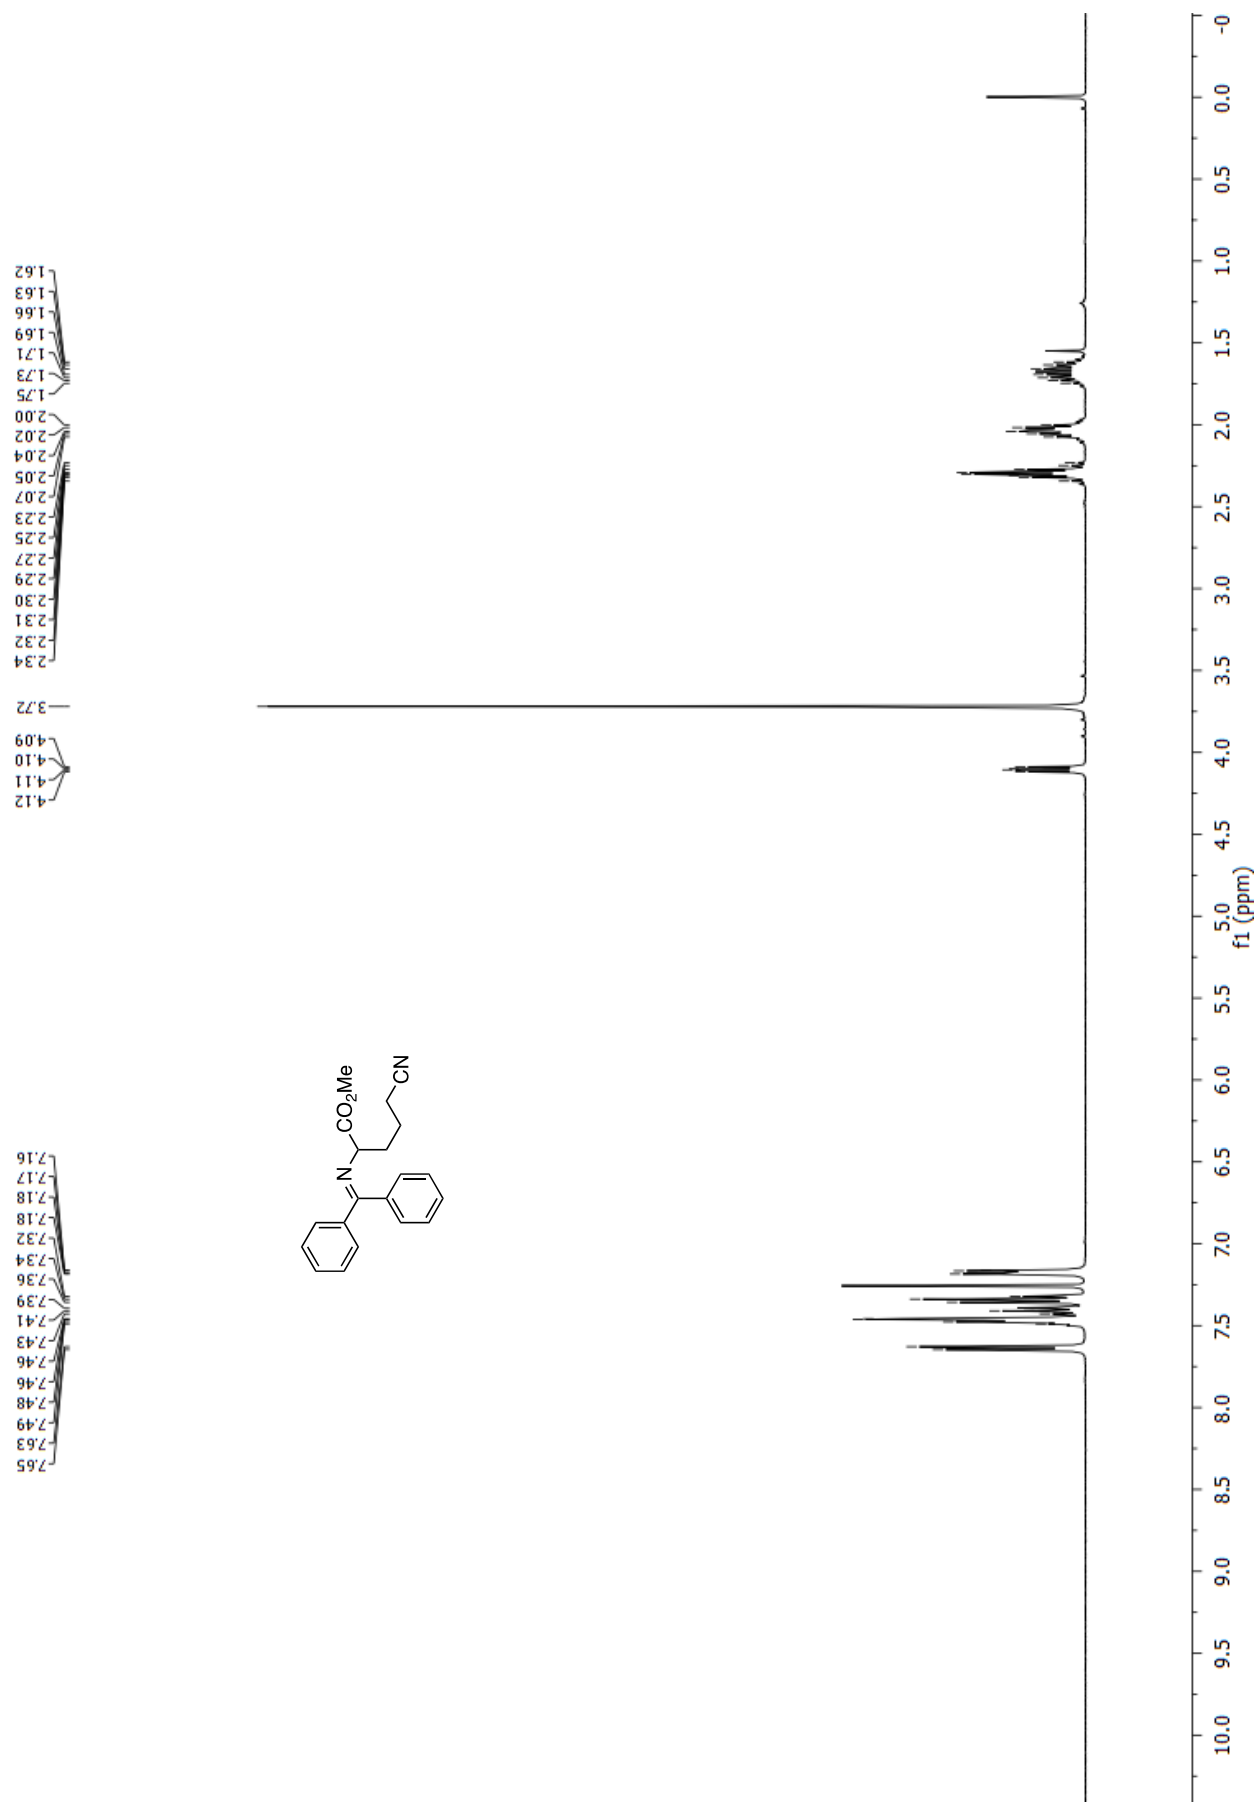

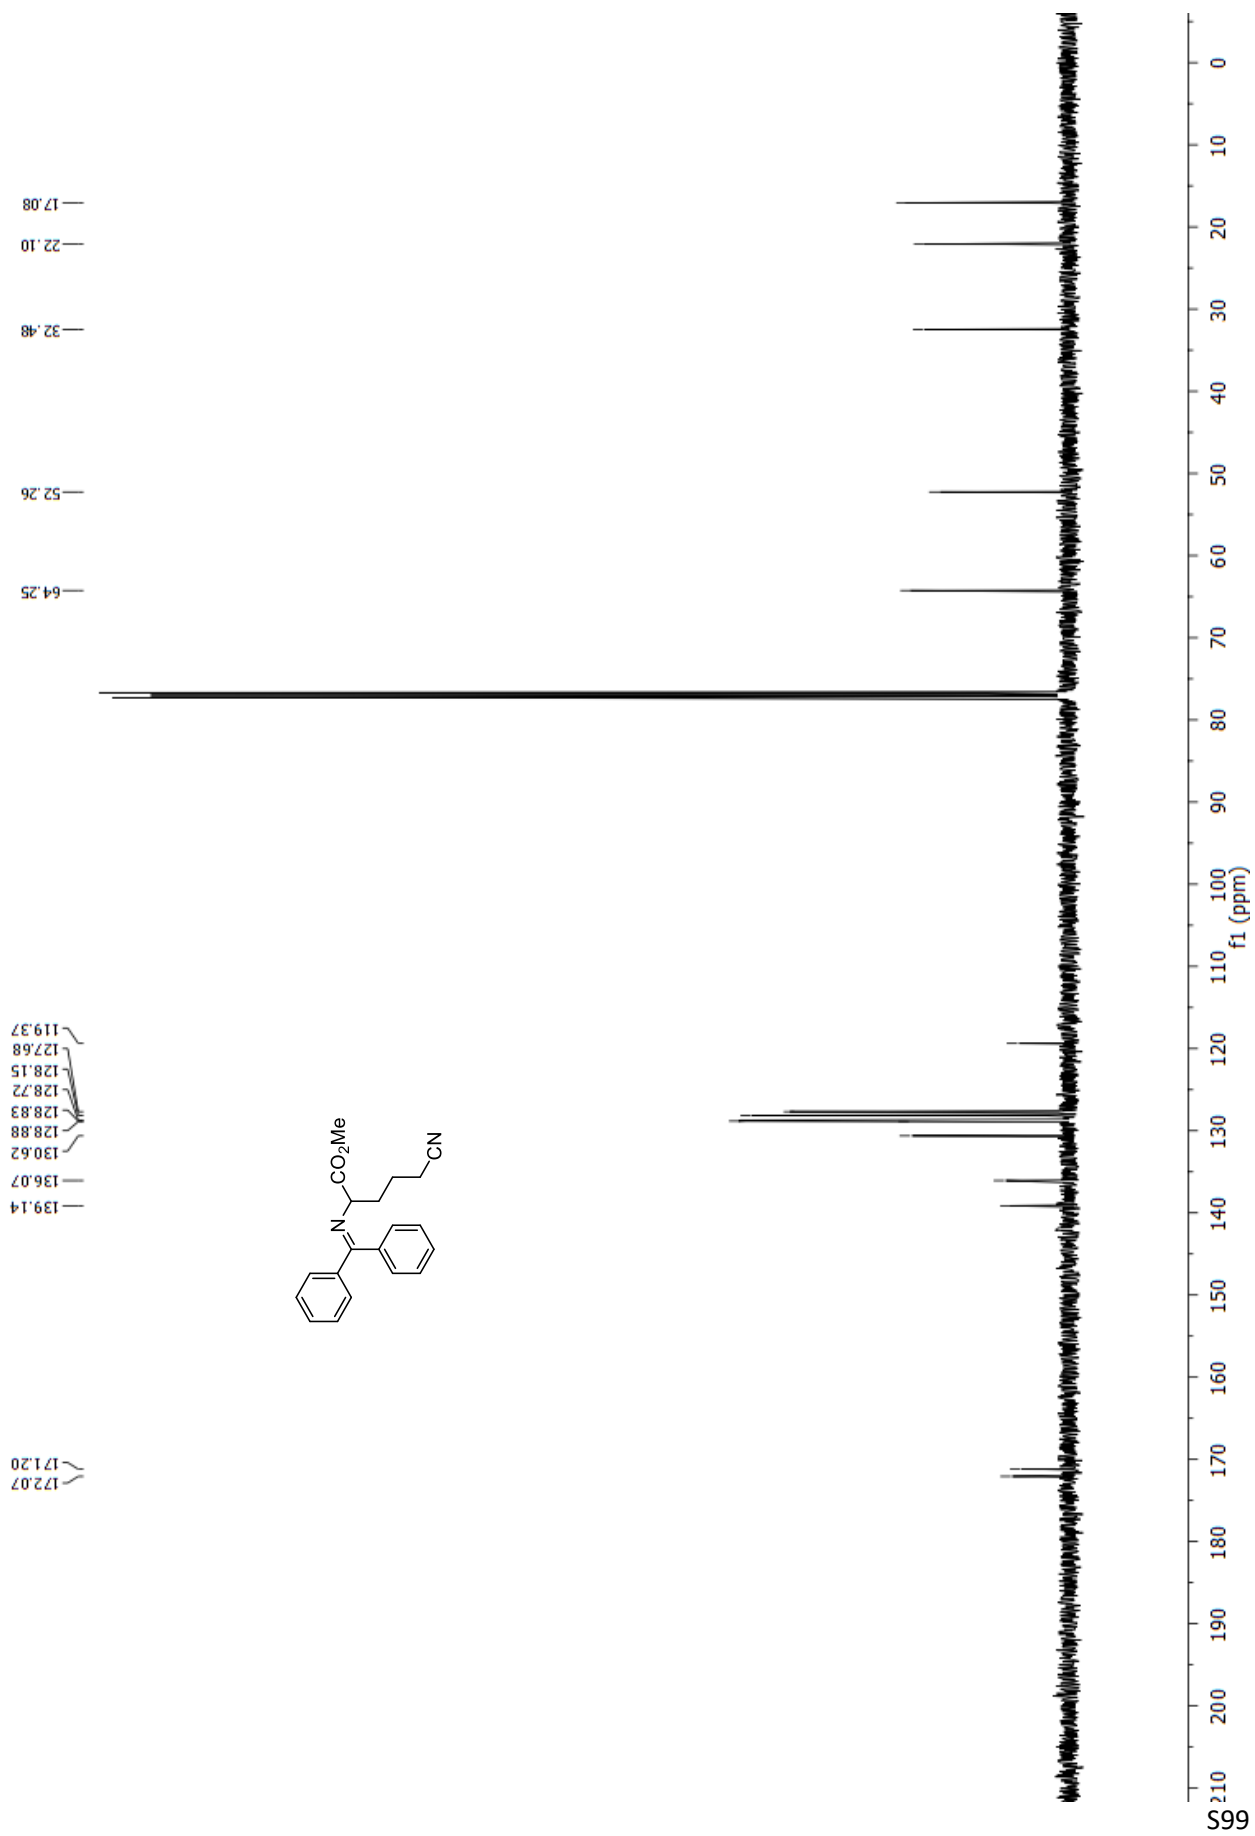

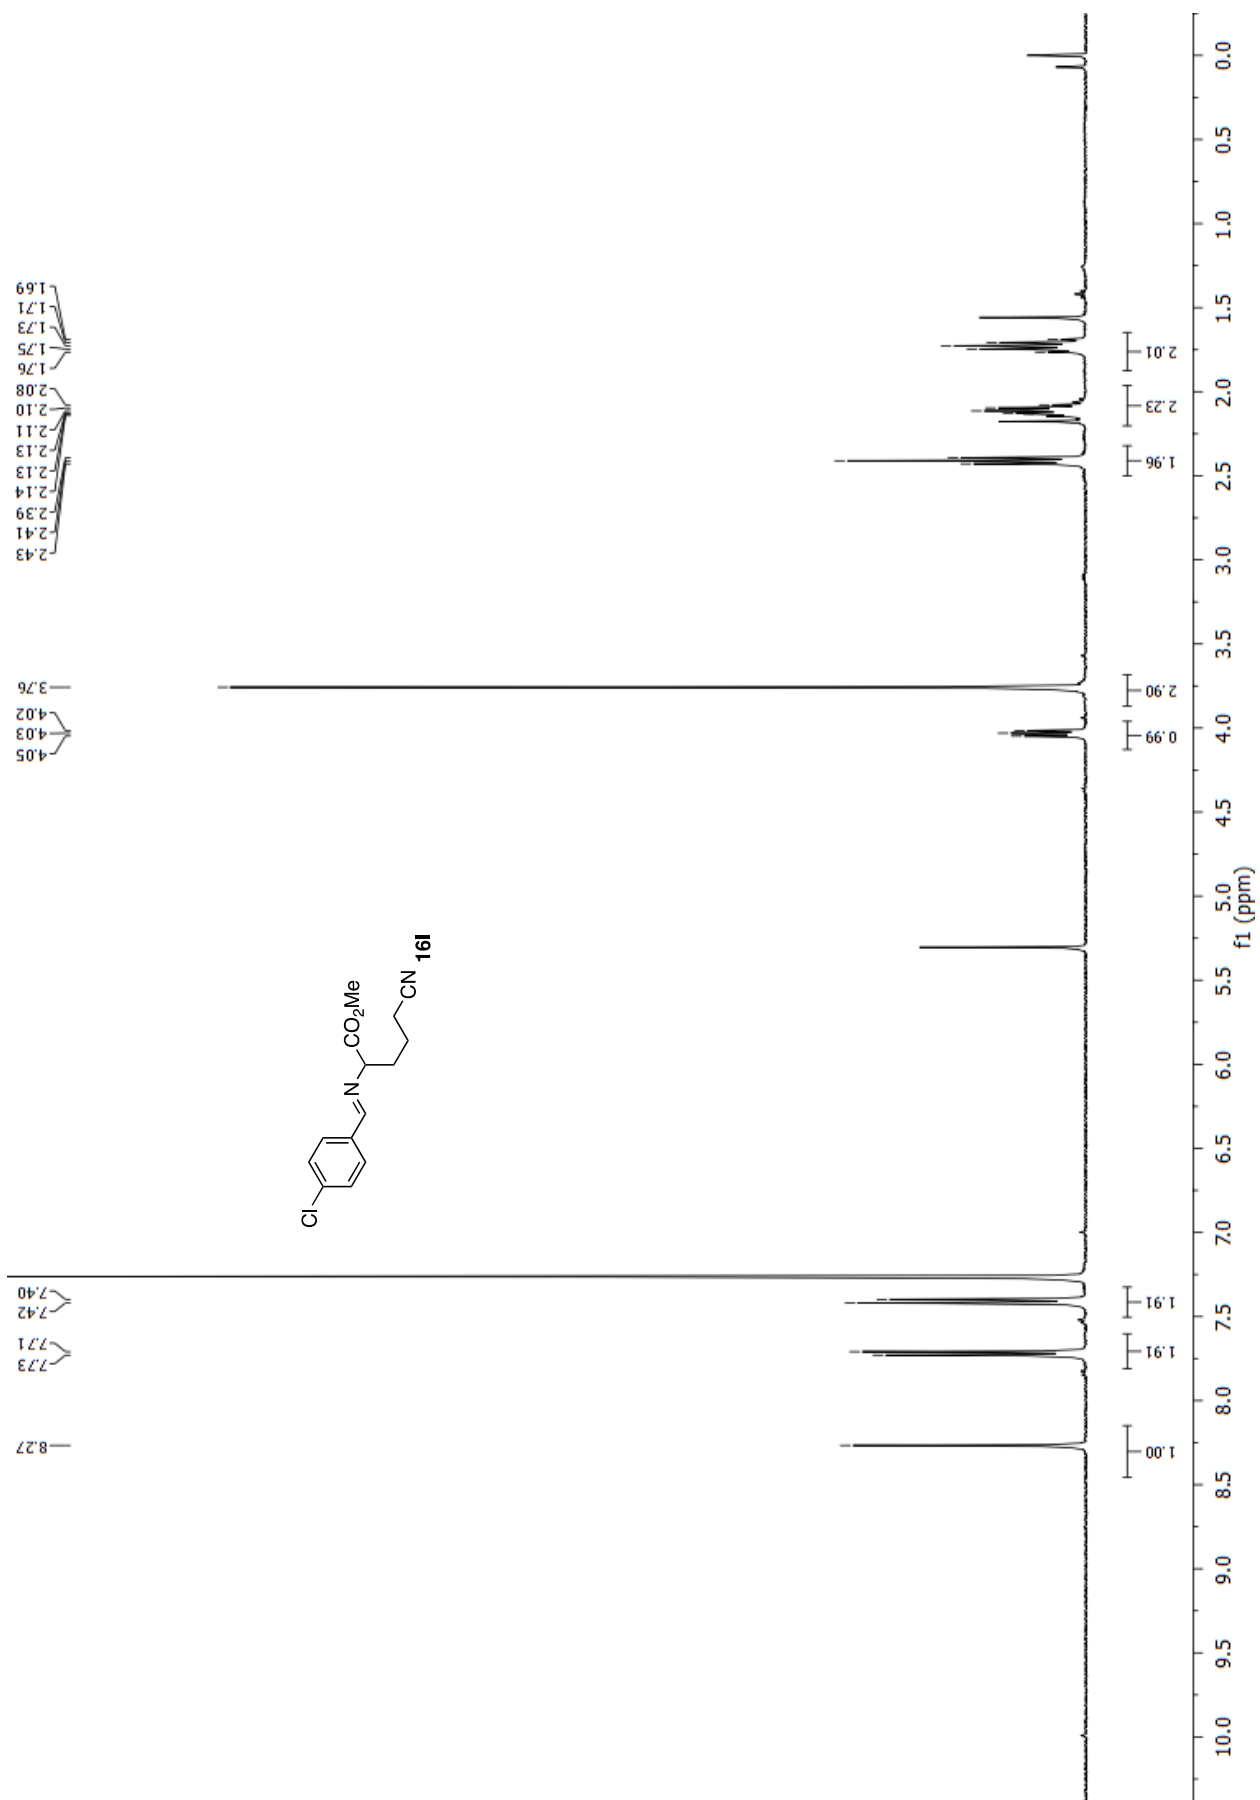

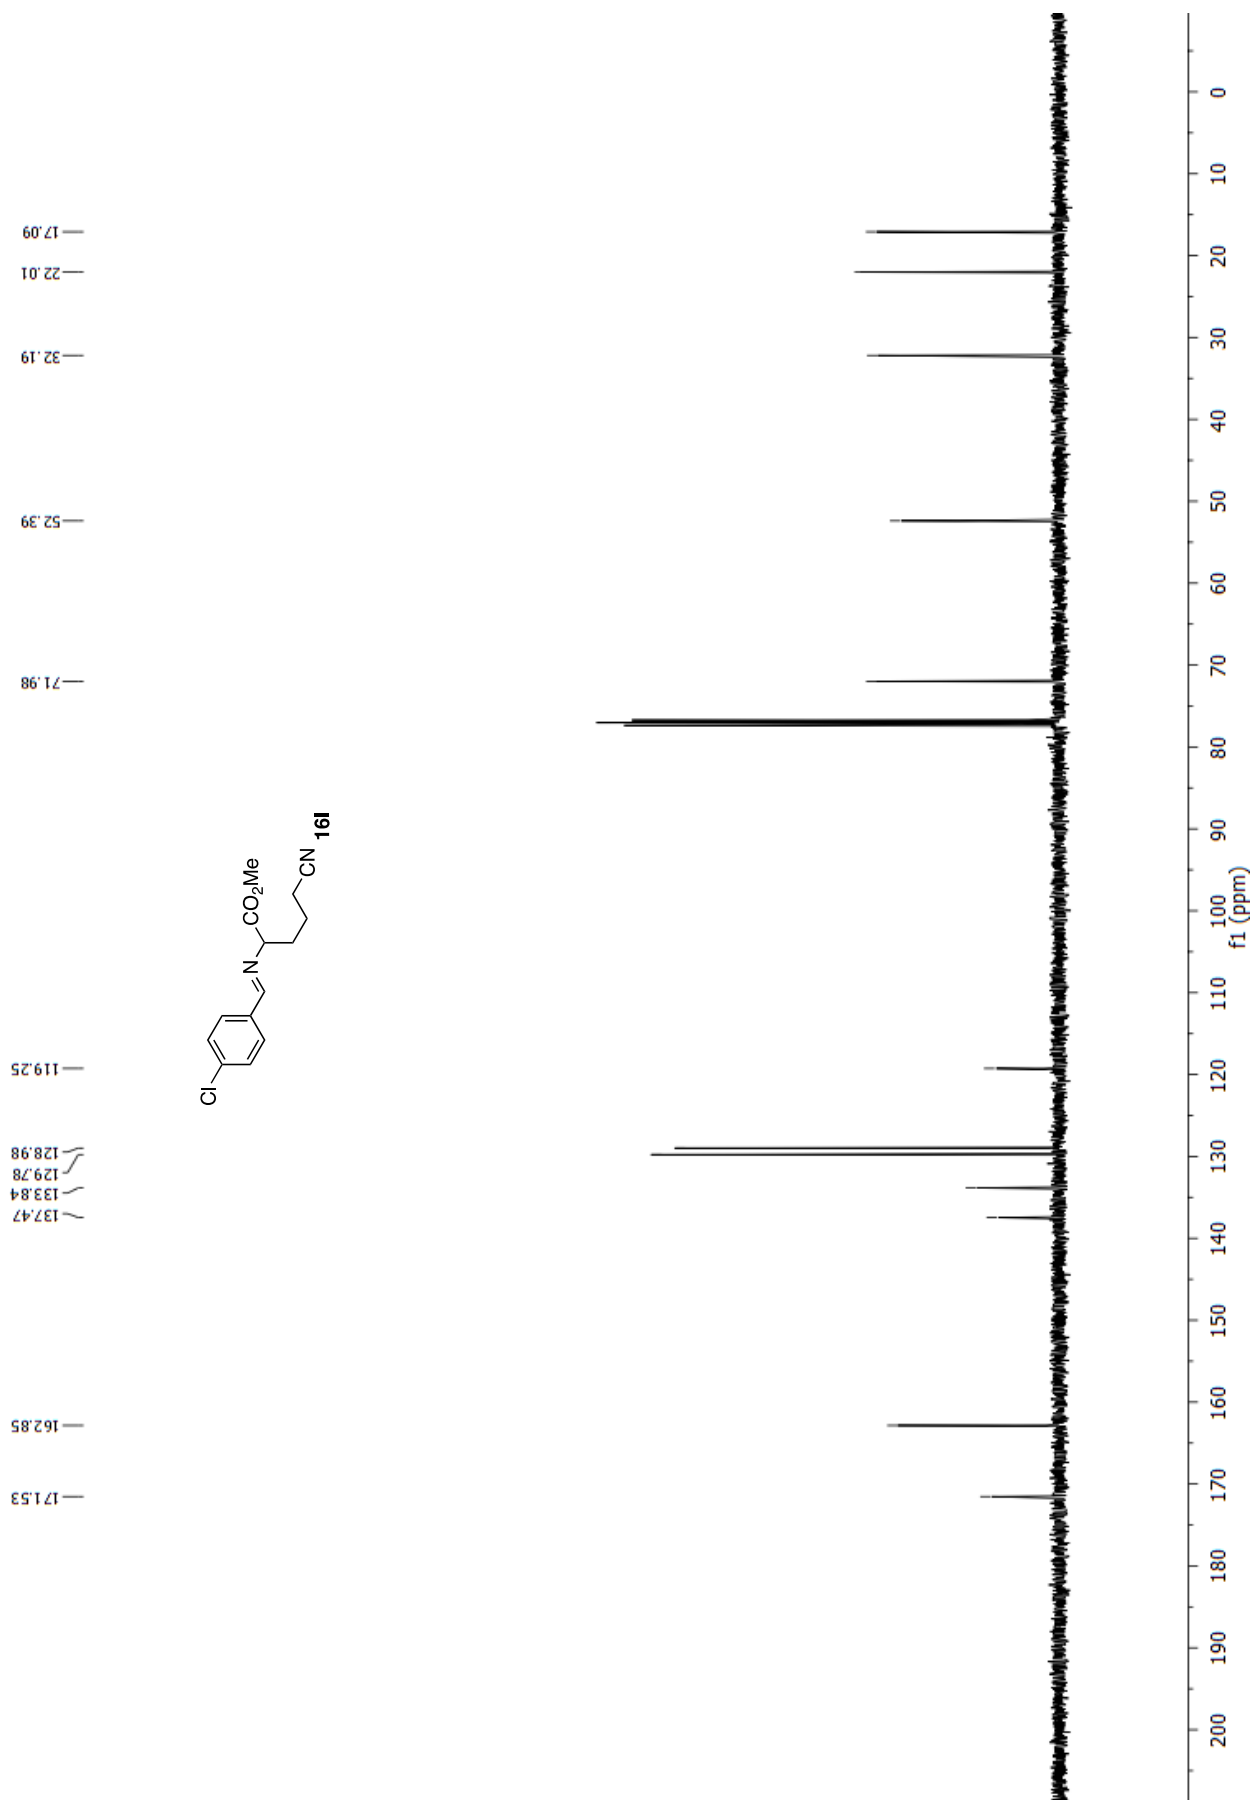

## Chiral HPLC Traces

Note: For each entry the top HPLC trace is a racemic sample that was prepared using an achiral cyclopropenimine

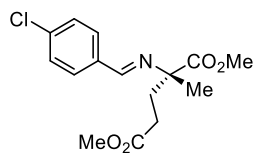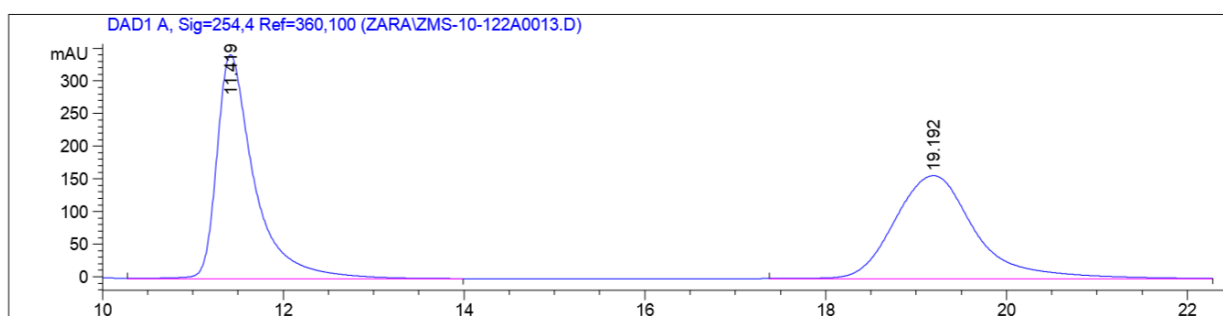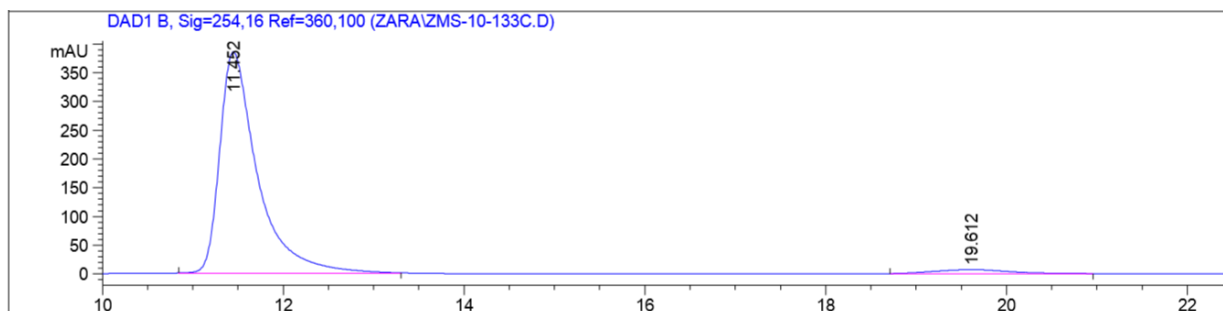

Signal 2: DAD1 B, Sig=254,16 Ref=360,100

| Peak # | RetTime [min] | Type | Width [min] | Area [mAU*s] | Height [mAU] | Area %  |
|--------|---------------|------|-------------|--------------|--------------|---------|
| 1      | 11.452        | BB   | 0.4295      | 1.12013e4    | 384.98013    | 96.4973 |
| 2      | 19.612        | BB   | 0.8173      | 406.59311    | 7.02483      | 3.5027  |

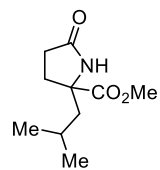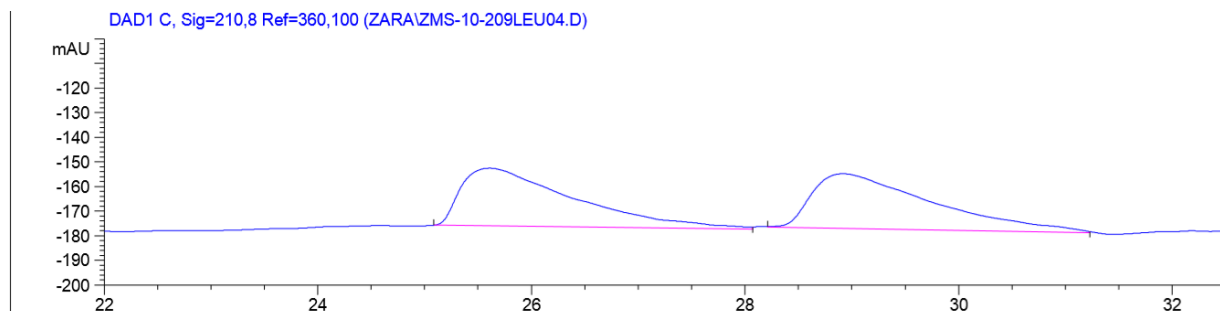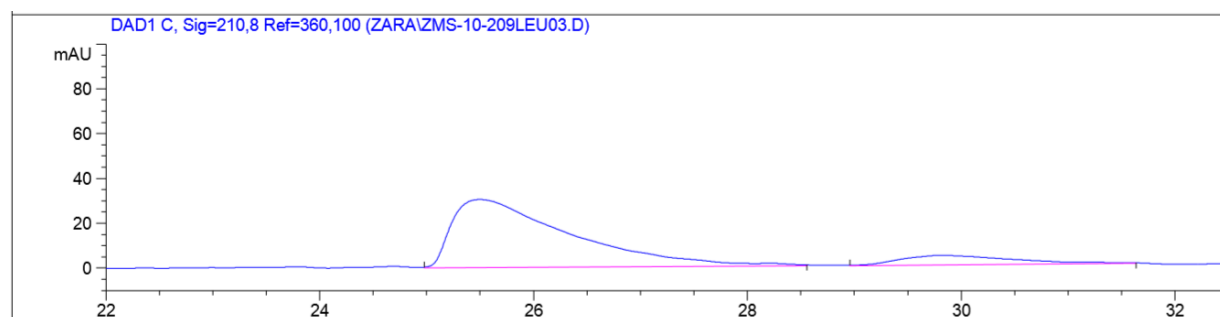

Signal 2: DAD1 C, Sig=210,8 Ref=360,100

| Peak # | RetTime [min] | Type | Width [min] | Area [mAU*s] | Area %  |
|--------|---------------|------|-------------|--------------|---------|
| 1      | 25.498        | MM   | 1.2768      | 2325.11548   | 88.5153 |
| 2      | 29.816        | MM   | 1.1754      | 301.67957    | 11.4847 |



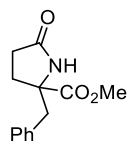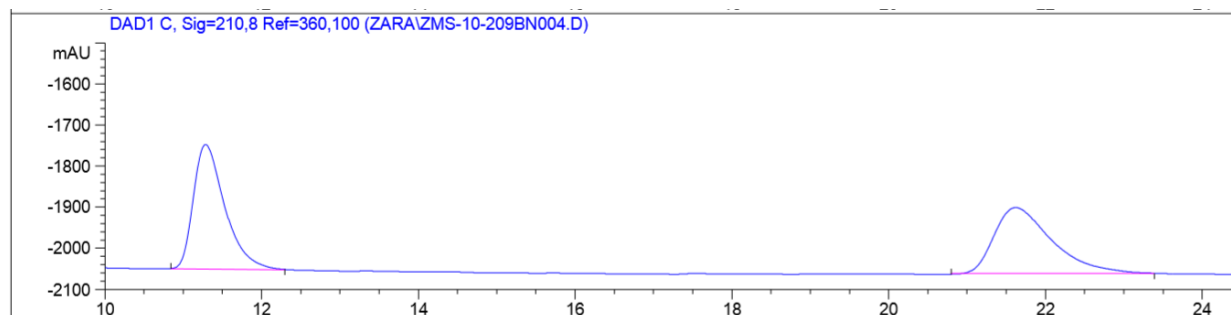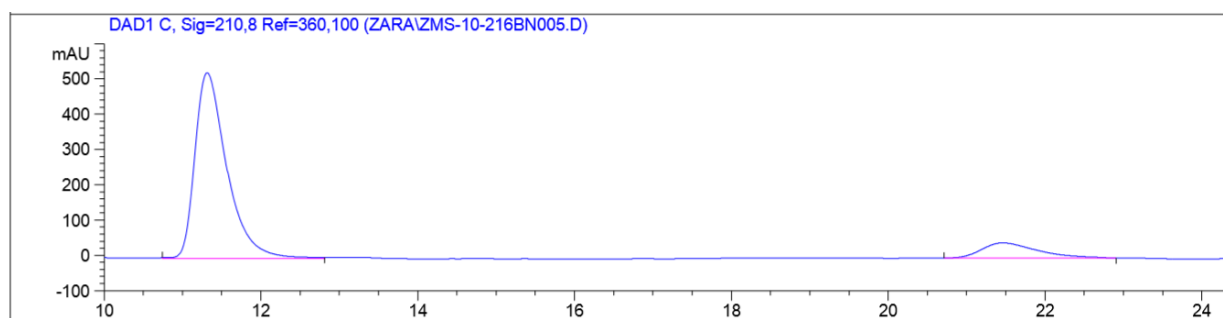

Signal 2: DAD1 C, Sig=210,8 Ref=360,100

| Peak # | RetTime [min] | Type | Width [min] | Area [mAU*s] | Area %  |
|--------|---------------|------|-------------|--------------|---------|
| 1      | 11.315        | MM   | 0.4716      | 1.48888e4    | 87.3501 |
| 2      | 21.460        | BB   | 0.7410      | 2156.17700   | 12.6499 |
